# Supplementary material for: The Role of the Private Sector in the COVID-19 Pandemic: Experiences From Four Health Systems
Source: PubMed Central journal article supplement (PMC9195628; doi:10.3389/fpubh.2022.878225), 2022-05-27
Supplement: Data_Sheet_1.pdf [file Data_Sheet_1.pdf]

## Nigeria media articles – NATIONAL DAILIES

| Date published | Title or full citation of media report                                                             | Source           |
|----------------|----------------------------------------------------------------------------------------------------|------------------|
| 27/01/2020     | Coronavirus: Bill and Melinda Gates Foundation Gives \$10m To China, Africa                        | Nigerian Tribune |
| 31/01/2020     | FG Develops Action Plan Against Coronavirus, Raises Response Committee                             | Nigerian Tribune |
| 31/01/2020     | FG strengthens response plan to stop importation of coronavirus                                    | Vanguard         |
| 01/02/2020     | FG reviews national strategies for Coronavirus, sets up committee to develop action plan           | The Guardian     |
| 03/02/2020     | Lagos Sets up Incident Command for Coronavirus                                                     | This Day         |
| 08/02/2020     | Coronavirus: WHO Deploys Experts To Support Nigeria's Response Plan                                | Nigerian Tribune |
| 12/02/2020     | BREAKING: Nigeria Gets Three Centres To Test For Coronavirus                                       | Nigerian Tribune |
| 13/02/2020     | Coronavirus, Lassa Fever: FG Offers N36 Million To Scientists For Solution                         | Nigerian Tribune |
| 20/02/2020     | Nigerians React To Use Of Chloroquine For Fighting Coronavirus                                     | The Guardian     |
| 24/02/2020     | Coronavirus: FG releases N386m for preparedness                                                    | Vanguard         |
| 28/02/2020     | Nigeria confirms first case of coronavirus                                                         | The Guardian     |
| 28/02/2020     | Coronavirus: FG Deploys Rapid Response Teams Across States                                         | This Day         |
| 28/02/2020     | Nigerians Panic as Lagos Scouts for Persons in Contact with Italian                                | This Day         |
| 28/02/2020     | BREAKING: FG Confirms First Case Of Coronavirus In Lagos                                           | Nigerian Tribune |
| 28/02/2020     | Don't Panic Over Confirmed Case Of Coronavirus — FG                                                | Nigerian Tribune |
| 28/02/2020     | NCDC Deploys Rapid Response Teams To Lagos                                                         | Nigerian Tribune |
| 29/02/2020     | FAAN, Port Health intensify screening at Lagos Airport                                             | Vanguard         |
| 01/03/2020     | NCAA harmonises COVID-19 preventive measures in airports                                           | Vanguard         |
| 01/03/2020     | FCT Residents Decry Scarcity Of Face Masks                                                         | Nigerian Tribune |
| 01/03/2020     | NCDC Releases 4th Advisory To Nigerians On COVID-19                                                | Nigerian Tribune |
| 02/03/2020     | The challenge and opportunities of Coronavirus                                                     | Punch            |
| 02/03/2020     | We trained 342 medical personnel before index case – LASEMA                                        | TheNation        |
| 03/03/2020     | Schools In Lagos Begin Preventive Measures To Protect Pupils, Students                             | Nigerian Tribune |
| 04/03/2020     | Lagos sensitises religious leaders to COVID-19                                                     | Punch            |
| 04/03/2020     | Ship owners get new guidelines to avoid Covid19                                                    | The Guardian     |
| 05/03/2020     | FG may review 2020 budget — Finance Minister                                                       | Vanguard         |
| 05/03/2020     | Buhari applauds Dangote Foundation's N200m donation                                                | The Guardian     |
| 06/03/2020     | COVID-19 and social media                                                                          | Vanguard         |
| 06/03/2020     | NCDC to Spend N1.6bn in 28 Days to Tackle Covid-19                                                 | This Day         |
| 06/03/2020     | Onne Port stations response team, holding bay at terminals                                         | Vanguard         |
| 09/03/2020     | FAAN strengthens airport safety                                                                    | Vanguard         |
| 09/03/2020     | FG confirms another case of coronavirus in Nigeria                                                 | Vanguard         |
| 09/03/2020     | FG urges personal hygiene to curb spread of coronavirus                                            | Vanguard         |
| 09/03/2020     | Buhari names 12-member presidential task force to control spread                                   | Punch            |
| 09/03/2020     | Health Minister Cautions Against Misinformation                                                    | Nigerian Tribune |
| 10/03/2020     | Common myths, controversies, misconceptions about coronavirus                                      | Punch            |
| 11/03/2020     | The World Health Organization (WHO) just declared the novel coronavirus outbreak to be a pandemic. | This Day         |
| 12/03/2020     | FG Increases Health Measures At Airports                                                           | Nigerian Tribune |
| 12/03/2020     | Nigeria Doesn't Stockpile Medical Consumables For Emergency Response -Expert                       | Nigerian Tribune |
| 13/03/2020     | NCDC advises FG on COVID-19 test centres location                                                  | Punch            |
| 13/03/2020     | Why Nigeria isn't implementing travel bans — Health Minister                                       | Vanguard         |
| 13/03/2020     | Why FG Remains Adamant To Place Travel Ban — Health Minister                                       | Nigerian Tribune |
| 14/03/2020     | Firm partners FAAN to prevent Coronavirus spread                                                   | The Guardian     |
| 15/03/2020     | Suspected COVID-19 patient isolated in Enugu                                                       | Vanguard         |
| 15/03/2020     | Enugu Quarantines COVID-19 Suspect                                                                 | This Day         |
| 15/03/2020     | Ban church, mosque worships for 40 days, Buhari's campaign DG tells FG                             | Vanguard         |
| 15/03/2020     | No plan to close schools over COVID-19                                                             | TheNation        |
| 15/03/2020     | Suspected COVID19 Patient: Enugu govt releases funds for emergency response                        | Vanguard         |
| 15/03/2020     | Nigeria Records Decline In Issuance Of Visas                                                       | Nigerian Tribune |

| <b>Date published</b> | <b>Title or full citation of media report</b>                                        | <b>Source</b>    |
|-----------------------|--------------------------------------------------------------------------------------|------------------|
| 16-Mar                | Nigeria's dysfunctional healthcare delivery system and COVID-19 incubus              | Vanguard         |
| 16-Mar                | Enugu case still undergoing medical test, minister declares                          | The Guardian     |
| 16-Mar                | Enugu COVID-19 suspect tests negative                                                | Punch            |
| 16-Mar                | Mass gathering can amplify spread of COVID-19 – NCDC                                 | Vanguard         |
| 16-Mar                | FG Suspends \$3.3bn Eurobond Issuance                                                | Nigerian Tribune |
| 16-Mar                | FG To Begin Secondary Screening Of Travellers From High-Risk Countries               | Nigerian Tribune |
| 16-Mar                | We'll Place Travel Restriction If... — FG                                            | Nigerian Tribune |
| 17-Mar                | Nigeria should deploy military to tackle pandemic, says Gbajabamila                  | Punch            |
| 17-Mar                | Abayomi calls for synergy between doctors in private, public hospitals               | Vanguard         |
| 17-Mar                | FG Extends Travel Caution to Germany, France, Spain                                  | This Day         |
| 17-Mar                | FG turns to varsities, ACEs to tackle COVID-19                                       | Punch            |
| 17-Mar                | Events of mass gatherings must reinforce messages on general hygiene — NCDC          | Vanguard         |
| 17-Mar                | FG Inaugurates Presidential Task Force on Coronavirus                                | This Day         |
| 17-Mar                | FG suspends aviation conference over COVID-19                                        | Vanguard         |
| 17-Mar                | Halting COVID-19 In Nigeria                                                          | Nigerian Tribune |
| 18-Mar                | FG bars officials from foreign trips                                                 | Vanguard         |
| 18-Mar                | Shut all borders now — Senate, House of Reps, NMA, others                            | Vanguard         |
| 18-Mar                | Experts Urge FG to Sustain Measures against COVID-19                                 | This Day         |
| 18-Mar                | FG Suspends Visa on Arrival Policy, Bans Travellers from 13 High-risk Countries      | This Day         |
| 18-Mar                | Enugu govt approves N320m relocates state Isolation Centre to ESUT Teaching Hospital | Vanguard         |
| 18-Mar                | LASG religious leaders bicker over plan shutdown of churches, mosques                | Vanguard         |
| 18-Mar                | Lagos govt places temporary ban on large religious gatherings                        | Vanguard         |
| 18-Mar                | FG cancels visas issued for 13 countries                                             | Vanguard         |
| 18-Mar                | Lagos govt bans religious congregational services over COVID-19                      | Vanguard         |
| 18-Mar                | Enugu Government approves relocation of isolation centre                             | Vanguard         |
| 18-Mar                | Coronavirus: Lagos announces closure of schools                                      | Punch            |
| 18-Mar                | Reps Ask FG To Shutdown Worship Centres                                              | Nigerian Tribune |
| 18-Mar                | Emefiele Announces N1.1trn Intervention Fund                                         | Nigerian Tribune |
| 19-Mar                | FG shutdown 104 unity colleges, public tertiary institutions                         | TheNation        |
| 19-Mar                | Lagos to Close all Sports Facilities                                                 | This Day         |
| 19-Mar                | FG Strategy Of Self-Quarantine Is Counter-Productive — NLC                           | Nigerian Tribune |
| 19-Mar                | Enugu Govt Shuts Down Primary And Secondary Schools                                  | Nigerian Tribune |
| 19-Mar                | FG, State Governors Agree On Establishment Of 36 Functional Test, Isolation Centres  | Nigerian Tribune |
| 19-Mar                | Nigeria's Travel Ban and the Delayed Measure against COVID-19                        | This Day         |
| 20-Mar                | Osinbajo Chairs FG/States Special Committee on COVID-19                              | This Day         |
| 20-Mar                | FG Restricts International Flights to Lagos, Abuja Airports                          | This Day         |
| 20-Mar                | NUC orders closure of all universities nationwide                                    | The Guardian     |
| 20-Mar                | WAEC postpones examination over COVID-19                                             | Vanguard         |
| 20-Mar                | COVID-19 Awareness Not Reaching Grassroots — CSOs                                    | Nigerian Tribune |
| 21-Mar                | FG shuts Enugu, Port Harcourt and Kano Airports                                      | Vanguard         |
| 21-Mar                | FG Stops Railway Operations in Nigeria                                               | This Day         |
| 21-Mar                | Lagos Reduces Social Gathering from 50 to 20                                         | This Day         |
| 21-Mar                | Nigeria closes all airports to international flights                                 | The Guardian     |
| 21-Mar                | Ortom expresses concern over safety of IDPs, Cameroonian refugees                    | Vanguard         |
| 22-Mar                | COVID-19 fund: SERAP asks Buhari to instruct EFCC, ICPC to track, monitor spending   | Vanguard         |
| 22-Mar                | Lagos Issues Public Transport Guidelines                                             | This Day         |
| 22-Mar                | Nigeria Moves to Lockdown as 11 New Cases are Confirmed in Lagos, Abuja              | This Day         |
| 23-Mar                | Enugu police enforces restriction order, stops unnecessary arrests, detention        | Vanguard         |
| 23-Mar                | NSCDC deploys 9500 to curtail spread of COVID- 19                                    | Vanguard         |
| 23-Mar                | FG to recall retired doctors, nurses over COVID-19                                   | TheNation        |
| 23-Mar                | FG shuts land borders over COVID-19                                                  | TheNation        |
| 23-Mar                | FG cautions religious, political leaders over flouting its directives                | Vanguard         |

| <b>Date published</b> | <b>Title or full citation of media report</b>                                                        | <b>Source</b>    |
|-----------------------|------------------------------------------------------------------------------------------------------|------------------|
| 30-Mar                | CBN-Led Coalition Begins Supply Of Medical Facilities In Six Geo-Political Zones                     | Nigerian Tribune |
| 04-Apr                | BoI donates N700 million towards COVID-19 relief aid                                                 | The Guardian     |
| 17-Apr                | Donations To COVID-19 Relief Fund Hit N25.8bn From 107 Donors, Says CBN                              | Nigerian Tribune |
| 19-Apr                | CACOVID to Distribute Food Worth N23bn to 10m Nigerians                                              | This Day         |
| 20-Apr                | CACOVID set to distribute food items to 1.7m vulnerable people in 774 local govts                    | Vanguard         |
| 04-Jun-20             | Health workers disagree over govts' takeover of COVID-19 battle                                      | Punch            |
| 04/06/2020            | Misinformation, Anxiety Fueled Covid-19, Says Google. 4 June 2020                                    | This Day         |
| 04/06/2020            | Ehanire commends Edo government on COVID-19 response                                                 | The Guardian     |
| 04/06/2020            | COVID-19: FG Will Approve Palliative for Security Agencies, Says PTF                                 | This Day         |
| 04/06/2020            | Hunger Games: The Socioeconomic Divide and Response to Disease Outbreaks                             | This Day         |
| 04/06/2020            | COVID-19: NIGERIA EXPERIENCING STEADY RISE IN MATERNAL, CHILD MORTALITY — PTF                        | Nigerian Tribune |
| 04/06/2020            | COVID-19: AFRICAN NATIONS GET \$9.8BN AS IMF SUPPORTS 66 COUNTRIES WITH \$23BN                       | Nigerian Tribune |
| 04/06/2020            | NIGERIANS HAWKING FAKE COVID-19 CONTRACT PAPERS, PTF RAISES ALARM                                    | Nigerian Tribune |
| 04/06/2020            | COVID-19: PTF DECRIES REFUSAL OF CITIZENS ON CONTACT TRACING, ISOLATION                              | Nigerian Tribune |
| 04/06/2020            | COVID-19: DON'T TRANSFER RESPONSIBILITY TO GOVERNORS, NMA PRESIDENT TELLS FG                         | Nigerian Tribune |
| 04-Jun                | NNPC launches App for COVID-19 contacts tracing, begins sale of products online                      | The Guardian     |
| 04-Jun                | Government not making good use of academic resources, says Adeyemi                                   | The Guardian     |
| 04-Jun                | How COVID-19 has derailed efforts to end AIDS, by Idoko                                              | The Guardian     |
| 04-Jun                | FG Laments Ravaging Effect of COVID-19 on Revenues                                                   | This Day         |
| 04-Jun                | COVID-19: Hacey holds maternal health support programme in Lagos, Ogun, Oyo                          | The Guardian     |
| 04-Jun                | PTF calls for decentralization of COVID-19 response to LGA level, identifying high burden LGAs       | The Guardian     |
| 04-Jun                | Why flights after COVID-19 will be 'expensive' – PTF                                                 | Punch            |
| 05/06/2020            | ACCOUNTING FOR COVID-19 FUNDS                                                                        | This Day         |
| 05/06/2020            | COVID-19: Nigeria's Response and Big Challenges                                                      | This Day         |
| 05/06/2020            | COVID-19: MDAs Earmark N20m to Improve Hygiene, Upgrade Facilities                                   | This Day         |
| 05/06/2020            | Horrendous revelations of COVID-19 – Part 2                                                          | The Guardian     |
| 05/06/2020            | FG removes antiviral drugs from COVID-19 treatment guidelines                                        | Punch            |
| 05/06/2020            | Inadequate PPE supply; a health risk to the frontline workers in Africa amidst the COVID-19 pandemic | The Guardian     |
| 05/06/2020            | Top nine coronavirus myths in Africa                                                                 | TheNation        |
| 06/06/2020            | Umahi gives palliatives to Ebonyi indigenes in Lagos                                                 | The Guardian     |
| 06/06/2020            | COVID-19: Lagos begins home care for asymptomatic patients, cases hit 11,844                         | Punch            |
| 06/06/2020            | We panic, expect the worst treating COVID-19 patients –Frontline health workers                      | Punch            |
| 06/06/2020            | Hotel owners seek palliatives from Lagos State, fault 'register to reopen' policy                    | The Guardian     |
| 06/06/2020            | COVID-19: Helppgate Foundation organises sensitisation programme                                     | The Guardian     |
| 06/06/2020            | There is no certified treatment, rapid test kit for COVID-19, says Ehanire                           | The Guardian     |
| 06/06/2020            | Lagos commences home-based care for asymptomatic COVID-19 cases management                           | The Guardian     |
| 06/06/2020            | COVID-19: AfDB approves Nigeria's \$288.5m loan                                                      | Punch            |
| 06/06/2020            | Lagos accredits three private hospitals for COVID-19 treatment                                       | Punch            |
| 06/06/2020            | COVID-19: NNPC COMMENCES CONSTRUCTION OF N21BN INFECTIOUS DISEASE HOSPITAL IN KATSINA                | Nigerian Tribune |
| 15-Jun                | CACOVID TAKES AWARENESS CAMPAIGN TO GRASSROOTS                                                       | Nigerian Tribune |
| 07-Jul                | Coronavirus: International transport and supply chains key to COVID-19 recovery – UN agencies        | The Guardian     |
| 17-Jul                | Why we didn't distribute looted COVID-19 palliatives – Committee                                     | Vanguard         |
| 23-Jul                | COVID-19 palliatives in warehouses were awaiting distribution — CACOVID                              | Vanguard         |
| 07-Aug                | CISLAC Asks N'Assembly to Probe Delay in Palliatives Distribution                                    | This Day         |
| 08-Aug                | FG inaugurates committees for COVID-19 recovery                                                      | Vanguard         |
| 09-Aug                | NCDC launches COVID-19NigeriaStories blog                                                            | Vanguard         |
| 11-Aug                | N28.7bn Spent On Food Items As Palliatives For Nigerians — CACOVID                                   | Nigerian Tribune |

| Date published        | Title or full citation of media report                                                                               | Source                 |
|-----------------------|----------------------------------------------------------------------------------------------------------------------|------------------------|
| 11-Aug                | COVID-19: THE PTF COLLABORATION MODEL                                                                                | This Day               |
| 13-Aug                | States get N66.5b as COVID-19 response grant                                                                         | The Guardian           |
| 31-Aug                | COVID-19 vaccine: Nigerians risk global travel ban, Senate warns, NMA allays fears                                   | Punch                  |
| 01-Sep                | FG Launches COVID-19 Incidence Tracker Dashboards                                                                    | This Day               |
| 06-Sep                | COVID-19: Chloroquine used only in clinical trials in Nigeria, says NCDC boss                                        | Vanguard               |
| 17-Sep                | How we spent N31bn in 4 months to fight COVID-19', FG replies SERAP, CODE                                            | Vanguard               |
| 19-Sep                | Accounting for COVID-19 funds                                                                                        | Punch                  |
| 23-Oct                | Making personal protective equipment against COVID-19 available in hospitals                                         | The Guardian           |
| 26-Oct                | Establishment of National Emergency Medical Service & Ambulance System (NEMSAS) for COVID-19 response                | The Guardian           |
| 01-Nov                | What Scientists Must Do to Access CBN's Research Grant                                                               | This Day               |
| 14-Nov                | Assessment of Public Health Emergency Operations Centres (PHEOC) in response to COVID-19 pandemic                    | The Guardian           |
| 19-Nov                | FG commends wapTV on COVID-19 enlightenment activities                                                               | The Guardian           |
| 21-Nov                | World Bank Approves \$114.28m for Nigeria to Boost States' COVID-19 Response                                         | This Day               |
| 25-Nov                | How non-communicable diseases fuel COVID-19 deaths in Nigeria                                                        | The Guardian           |
| 27-Nov                | Group to close Eti-Osa isolation centre in two weeks                                                                 | The Guardian           |
| 04-Dec                | CACOVID donates N1.4bn medical equipment, 26,400 test kits to boost Covid-19 testing across Nigeria                  | The Guardian           |
| 06-Dec                | NIMR to deploy non-invasive ventilators for COVID-19 patients                                                        | The Guardian           |
| 07-Dec                | COVID-19 must not overshadow HIV — YEDI                                                                              | Vanguard               |
| 7th November, 2020.   | Plateau COVID-19 medical research team submits products to regulatory agencies. David. (.)                           | The Sun Newspaper      |
| 29th October, 2020.   | Medical Guild to chart roadmap on healthcare, mental delivery. Kuni Tyessi. (.)                                      | Thisday Newspaper      |
| 28th May, 2020.       | PTF decries continued refusal by hospitals to treat patients for fear COVID-19. Nkechi Onyedika-Ugoeze. (.)          | The Guardian Newspaper |
| 10th November, 2020.  | Obaseki tasks scientists on innovations, homegrown vaccine for COVID-19. (.)                                         | The Nigerian Observer  |
| 17th November, 2020.  | Strengthening health systems, citizen's participation against COVID-19. (.)                                          | Daily trust            |
| 30th October, 2020.   | Leveraging COVID-19 tools to fund Nigeria's epidemic preparedness. Anthonia Obokoh. (.)                              | Business Day           |
| 4th September, 2020.  | States to retain Ta reliefs till June 2021. Chuks Okocha. (.)                                                        | Thisday Newspaper      |
| 10th September, 2020. | Nigeria media and the fight against COVID-19 misinformattion. (.)                                                    | Thisday Newspaper      |
| 12 September, 2020.   | Group presents gender analysis survey on COVID-19 impact on households. Thomas-Odia. (.)                             | The Guardian Newspaper |
| 10 June, 2020.        | Sexual and gender-based violence: Hidden social pandemic under rader of COVID-19 lockdown-Part 2. Ejiro Umukoro. (.) | The Guardian Newspaper |
| 21st September, 2020. | COVID-19 in Nigeria: States under-testing for virus, FG says. Juliana Taiwo-Obalonye. (.)                            | The Sun Newspaper      |
| 7th August, 2020.     | W'Bank approves \$114.28m for Nigeria to fight COVID-19. Ajiri Daniels. (.)                                          | The Sun                |
| 7 October, 2020.      | Advancing financial inclusion for women. Obinna Chima. (r).                                                          | Thisday Newspaper      |
| 16th October, 2020.   | IMF commits \$100b loans to Nigeria, 79 other economies. Alao Abiodun. (.)                                           | The Nation             |
| 5 May, 2020.          | COVID-19: Nigeria needs updated legislation on infectious diseases- FG. Ahmed Musa. (.)                              | Daily Independent      |
| 24 July, 2020.        | COVID-19: FG asks states to ban Sallah activities. Ekene Coleman. (.)                                                | Daily Independent      |

| <b>Date published</b> | <b>Title or full citation of media report</b>                                                                   | <b>Source</b>          |
|-----------------------|-----------------------------------------------------------------------------------------------------------------|------------------------|
| 24 August, 2020.      | COVID-19: Our case fatality on decline, FG says as figure reaches 1000. ().                                     | Vanguard               |
| 31 August, 2020.      | Fighting for Nigeria: Heroes of battle against COVID-19. Obinna Chima, Kunle Aderinokun and Martins Ifijeh. (). | Thisday Newspaper      |
| 12 May, 2020.         | Nigeria's COVID-19 communications needs to be more inclusive. Omorinsola Balogun. ().                           | Business day           |
| 7 July 2020.          | Slowing spread of COVID-19 with contact tracing apps. Chukwuma Muanya. ).                                       | The Guardian Newspaper |
| 14 June, 2020.        | Little to cheer in health sector, one year after Buhari's second term. Chukwuma Muanya. ().                     | The Guardian Newspaper |
| 5 May, 2020.          | Coronavirus: Buhari seeks int'l cooperation. Egena Sunday Ode. ().                                              | Peoples Daily          |
| 3rd September, 2020.  | Africa countries sign up for COVID-19 vaccine initiative. ().                                                   | The premium times      |
| 8th November, 2020.   | NACA, UN, others identify preventive measures against COVID-19 spread. ().                                      | The Punch Newspaper    |
| 30th October, 2020    | Abuja shuts three isolation centres as COVID-19 infection drops. Eniola Akinkuotu. ).                           | The Punch Newspaper    |
| 22nd September, 2020. | FG to states: Fight COVID-19 with N32bn we gave you. ().                                                        | Daily Trust            |
| 26th June, 2020.      | The 'new normal': Living with and defeating COVID-19.                                                           | Daily Trust            |
| 28th October, 2020.   | Implement 15% budgetary allocation to health, NMA tasks FG. Gabriel Olawale. ().                                | Vanguard               |
| 5th August, 2020.     | CBN's COVID-19 intervention. Rasheed Hassan. ().                                                                | Thisday Newspaper      |

## Nigeria media articles – BLOGS AND ONLINE NEWS

| Source/URL                                                                                                                                                                                                                                                                                                                  | Main purpose                                                                                                      |
|-----------------------------------------------------------------------------------------------------------------------------------------------------------------------------------------------------------------------------------------------------------------------------------------------------------------------------|-------------------------------------------------------------------------------------------------------------------|
| <a href="http://saction.org/civil-societys-role-in-nigerias-covid-19-response/">http://saction.org/civil-societys-role-in-nigerias-covid-19-response/</a>                                                                                                                                                                   | Civil Society's Role In Nigeria's COVID-19 Response                                                               |
| <a href="http://www.factcheckng.com/2020/05/how-csos-ngos-aged-fight-covid-19-in.html">http://www.factcheckng.com/2020/05/how-csos-ngos-aged-fight-covid-19-in.html</a>                                                                                                                                                     | How CSOs, NGOs, aged fight COVID-19 in Nigeria                                                                    |
| <a href="http://www.healthnews.ng/nigerias-covid-19-response-threatened-by-social-stigma/">http://www.healthnews.ng/nigerias-covid-19-response-threatened-by-social-stigma/</a>                                                                                                                                             | Nigeria's COVID-19 response threatened by social stigma                                                           |
| <a href="https://africa.cgtn.com/2020/06/28/nigerias-economic-hub-expands-covid-19-response-capacity/">https://africa.cgtn.com/2020/06/28/nigerias-economic-hub-expands-covid-19-response-capacity/</a>                                                                                                                     | Nigeria's economic hub expands COVID-19 response capacity                                                         |
| <a href="https://africa.unwomen.org/en/news-and-events/stories/2020/04/covid-19-and-the-link-to-violence-against-women-and-girls">https://africa.unwomen.org/en/news-and-events/stories/2020/04/covid-19-and-the-link-to-violence-against-women-and-girls</a>                                                               | COVID-19 and the link to Violence Against Women and Girls                                                         |
| <a href="https://medium.com/@SustainableDFS/for-nigerias-poor-covid-19-is-just-one-out-of-a-myrriad-of-life-hazards-baeca528a2db">https://medium.com/@SustainableDFS/for-nigerias-poor-covid-19-is-just-one-out-of-a-myrriad-of-life-hazards-baeca528a2db</a>                                                               | For Nigeria's poor, Covid-19 is just one of a myriad of life hazards                                              |
| <a href="https://nairametrics.com/2020/06/08/covid-19-survey-confirms-job-losses-hardship-for-nigerians/">https://nairametrics.com/2020/06/08/covid-19-survey-confirms-job-losses-hardship-for-nigerians/</a>                                                                                                               | COVID-19: Survey confirms job losses, hardship for Nigerians                                                      |
| <a href="https://ncdc.gov.ng/news/258/nigeria-launches-covid-19-online-course-on-infection-prevention-and-control-%28ipc%29">https://ncdc.gov.ng/news/258/nigeria-launches-covid-19-online-course-on-infection-prevention-and-control-%28ipc%29</a>                                                                         | Nigeria Launches COVID-19 Online Course on Infection Prevention and Control (IPC)                                 |
| <a href="https://phys.org/news/2020-05-nigerian-tackle-covid-urban-poor.html">https://phys.org/news/2020-05-nigerian-tackle-covid-urban-poor.html</a>                                                                                                                                                                       | Nigerian government's plan to tackle COVID-19 leaves urban poor further disadvantaged                             |
| <a href="https://publicservices.international/resources/news/internally-displaced-persons-in-nigeria-face-double-risk-boko-haram-and-covid?id=10935&amp;lang=en">https://publicservices.international/resources/news/internally-displaced-persons-in-nigeria-face-double-risk-boko-haram-and-covid?id=10935&amp;lang=en</a> | Internally displaced persons in Nigeria face double risk: Boko Haram and Covid                                    |
| <a href="https://www.aa.com.tr/en/africa/nigeria-ramps-up-response-efforts-to-smash-coronavirus/1771922">https://www.aa.com.tr/en/africa/nigeria-ramps-up-response-efforts-to-smash-coronavirus/1771922</a>                                                                                                                 | Nigeria ramps up response efforts to smash coronavirus                                                            |
| <a href="https://www.bloomberg.com/news/articles/2020-07-05/nigerian-security-response-to-covid-is-deadlier-than-the-disease">https://www.bloomberg.com/news/articles/2020-07-05/nigerian-security-response-to-covid-is-deadlier-than-the-disease</a>                                                                       | Nigerian Security Response to Covid Is Deadlier Than the Disease                                                  |
| <a href="https://www.bond.org.uk/news/2020/04/development-in-the-face-of-covid-19-views-from-nigeria">https://www.bond.org.uk/news/2020/04/development-in-the-face-of-covid-19-views-from-nigeria</a>                                                                                                                       | Development in the face of Covid-19: Views from Nigeria                                                           |
| <a href="https://www.devex.com/news/opinion-covid-19-is-a-game-changer-for-health-financing-in-nigeria-97117">https://www.devex.com/news/opinion-covid-19-is-a-game-changer-for-health-financing-in-nigeria-97117</a>                                                                                                       | Opinion: COVID-19 is a game-changer for health financing in Nigeria                                               |
| <a href="https://www.e-ir.info/2020/06/22/nigerias-soft-power-in-the-face-of-covid-19/">https://www.e-ir.info/2020/06/22/nigerias-soft-power-in-the-face-of-covid-19/</a>                                                                                                                                                   | Nigeria's Soft Power in the Face of COVID-19                                                                      |
| <a href="https://www.hrw.org/news/2020/03/25/nigeria-covid-19-cases-rise">https://www.hrw.org/news/2020/03/25/nigeria-covid-19-cases-rise</a>                                                                                                                                                                               | Nigeria: COVID-19 Cases On the Rise, Ensure Emergency Preparedness for Displaced, Vulnerable People               |
| <a href="https://www.hrw.org/news/2020/04/14/nigeria-protect-most-vulnerable-covid-19-response">https://www.hrw.org/news/2020/04/14/nigeria-protect-most-vulnerable-covid-19-response</a>                                                                                                                                   | Nigeria: Protect Most Vulnerable in COVID-19 Response. Extended Lockdown Threatens Livelihoods of Millions        |
| <a href="https://www.orfonline.org/expert-speak/nigeria-must-not-forget-its-poor-in-the-covid-19-world-64389/">https://www.orfonline.org/expert-speak/nigeria-must-not-forget-its-poor-in-the-covid-19-world-64389/</a>                                                                                                     | Nigeria must not forget its poor in the Covid-19 world                                                            |
| <a href="https://www.proshareng.com/news/Fiscal%20Policy/COVID-19--Federal-Government-of-Nigeria-Announces-Fiscal-Stimulus-Measures/50321">https://www.proshareng.com/news/Fiscal%20Policy/COVID-19--Federal-Government-of-Nigeria-Announces-Fiscal-Stimulus-Measures/50321</a>                                             | COVID-19: Federal Government of Nigeria Announces Fiscal Stimulus Measures                                        |
| <a href="https://www.ripplesnigeria.com/special-report-without-palliatives-small-businesses-families-suffer-amid-covid-19-lockdown-in-enugu/">https://www.ripplesnigeria.com/special-report-without-palliatives-small-businesses-families-suffer-amid-covid-19-lockdown-in-enugu/</a>                                       | SPECIAL REPORT... Without palliatives, small businesses, families suffer amid COVID-19 lockdown in Enugu          |
| <a href="https://www.savethechildren.net/news/save-children-covid-19-set-impact-hundreds-thousands-children-dangerous-mix-poverty-hunger-and">https://www.savethechildren.net/news/save-children-covid-19-set-impact-hundreds-thousands-children-dangerous-mix-poverty-hunger-and</a>                                       | COVID-19 set to impact hundreds of thousands of children in dangerous mix of poverty, hunger and protection risks |
| <a href="https://www.tekedia.com/examining-nigerias-response-to-covid-19-pandemic/">https://www.tekedia.com/examining-nigerias-response-to-covid-19-pandemic/</a>                                                                                                                                                           | Examining Nigeria's Response to Covid-19 Pandemic                                                                 |

| Source/URL                                                                                                                                                                                                                                                                                                                                                                                        | Main purpose                                                                                                                                                                                                                                                                                                                                                           |
|---------------------------------------------------------------------------------------------------------------------------------------------------------------------------------------------------------------------------------------------------------------------------------------------------------------------------------------------------------------------------------------------------|------------------------------------------------------------------------------------------------------------------------------------------------------------------------------------------------------------------------------------------------------------------------------------------------------------------------------------------------------------------------|
| <a href="https://www.theafricareport.com/33300/pandemic-to-poverty-nigeria-in-the-post-covid-future/">https://www.theafricareport.com/33300/pandemic-to-poverty-nigeria-in-the-post-covid-future/</a>                                                                                                                                                                                             | Nigeria: Pandemic to poverty in the post-COVID future                                                                                                                                                                                                                                                                                                                  |
| <a href="https://www.thinkglobalhealth.org/article/coronavirus-nigeria-case-community-engagement">https://www.thinkglobalhealth.org/article/coronavirus-nigeria-case-community-engagement</a>                                                                                                                                                                                                     | Coronavirus in Nigeria: A Case for Community Engagement                                                                                                                                                                                                                                                                                                                |
| <a href="https://www.voanews.com/covid-19-pandemic/nigeria-resumes-domestic-flights-amid-pandemic">https://www.voanews.com/covid-19-pandemic/nigeria-resumes-domestic-flights-amid-pandemic</a>                                                                                                                                                                                                   | Nigeria Resumes Domestic Flights Amid Pandemic                                                                                                                                                                                                                                                                                                                         |
| <a href="https://www.von.gov.ng/covid-19-urban-poor-to-benefit-from-palliatives-humanitarian-affairs-minister/">https://www.von.gov.ng/covid-19-urban-poor-to-benefit-from-palliatives-humanitarian-affairs-minister/</a>                                                                                                                                                                         | COVID-19: Urban poor to benefit from palliatives – Humanitarian Affairs Minister                                                                                                                                                                                                                                                                                       |
| <a href="https://www.who.int/health-cluster/news-and-events/news/Nigeria-multi-sector-covid-19/en/">https://www.who.int/health-cluster/news-and-events/news/Nigeria-multi-sector-covid-19/en/</a>                                                                                                                                                                                                 | Multi-sector collaboration in Nigeria’s COVID-19 Response                                                                                                                                                                                                                                                                                                              |
| <a href="https://www.wsscc.org/media/resources/fighting-covid-19-pandemic-should-not-be-one-emergency-action">https://www.wsscc.org/media/resources/fighting-covid-19-pandemic-should-not-be-one-emergency-action</a>                                                                                                                                                                             | Fighting the COVID-19 pandemic should not be a one-off emergency action                                                                                                                                                                                                                                                                                                |
| <a href="https://www.afro.who.int/news/who-supports-anambra-state-boost-covid-19-testing-capacity-trains-cohort-health-workers">https://www.afro.who.int/news/who-supports-anambra-state-boost-covid-19-testing-capacity-trains-cohort-health-workers</a>                                                                                                                                         | To boost COVID-19 testing capacity, trains cohort of health workers                                                                                                                                                                                                                                                                                                    |
| <a href="http://www.nigerianwatch.com/governor-obiano-shuts-down-eke-awka-market-as-anambrans-ignore-covid-19-safeguards/">http://www.nigerianwatch.com/governor-obiano-shuts-down-eke-awka-market-as-anambrans-ignore-covid-19-safeguards/</a>                                                                                                                                                   | To ensure there is adherence to Covid local preventive guidelines. Thus, curtailing the spread of corona virus in the market. This was as a result of non-compliance by the market traders and customers with Covid-19 protocols including wearing of protective face masks, provision of running water and soap for washing of hands, keeping of physical distancing. |
| <a href="https://theconversation.com/lagos-makes-it-hard-for-people-living-in-slums-to-cope-with-shocks-like-covid-19-138234">https://theconversation.com/lagos-makes-it-hard-for-people-living-in-slums-to-cope-with-shocks-like-covid-19-138234</a>                                                                                                                                             | Lagos makes it hard for people living in slums to cope with shocks like COVID-19                                                                                                                                                                                                                                                                                       |
| <a href="https://www.one.org/africa/blog/how-nigeria-minimize-impact-covid-19/">https://www.one.org/africa/blog/how-nigeria-minimize-impact-covid-19/</a>                                                                                                                                                                                                                                         | COVID-19’s potential impact in Nigeria                                                                                                                                                                                                                                                                                                                                 |
| <a href="https://theconversation.com/why-nigerias-efforts-to-support-poor-people-fail-and-what-can-be-done-about-it-137122">https://theconversation.com/why-nigerias-efforts-to-support-poor-people-fail-and-what-can-be-done-about-it-137122</a>                                                                                                                                                 | Why Nigeria’s efforts to support poor people fail, and what can be done about it                                                                                                                                                                                                                                                                                       |
| <a href="https://nigeriahealthwatch.com/a-case-for-phcs-in-the-fight-against-covid19/#.Xw31-hQo_IU">https://nigeriahealthwatch.com/a-case-for-phcs-in-the-fight-against-covid19/#.Xw31-hQo_IU</a>                                                                                                                                                                                                 | A case for PHCs in the fight against COVID19                                                                                                                                                                                                                                                                                                                           |
| <a href="https://www.cfr.org/blog/how-nigeria-has-responded-covid-19-so-far">https://www.cfr.org/blog/how-nigeria-has-responded-covid-19-so-far</a>                                                                                                                                                                                                                                               | How Nigeria Has Responded to COVID-19 So Far                                                                                                                                                                                                                                                                                                                           |
| <a href="https://www.cgdev.org/blog/nigeria-ready-leave-lockdown">https://www.cgdev.org/blog/nigeria-ready-leave-lockdown</a>                                                                                                                                                                                                                                                                     | Is Nigeria Ready to Leave Lockdown?                                                                                                                                                                                                                                                                                                                                    |
| <a href="http://rosalux.sn/en/5146/">http://rosalux.sn/en/5146/</a>                                                                                                                                                                                                                                                                                                                               | Challenges of Fighting COVID-19 Pandemic the Nigerian Case                                                                                                                                                                                                                                                                                                             |
| <a href="https://theconversation.com/coronavirus-corruption-in-health-care-could-get-in-the-way-of-nigerias-response-136913">https://theconversation.com/coronavirus-corruption-in-health-care-could-get-in-the-way-of-nigerias-response-136913</a>                                                                                                                                               | Coronavirus: corruption in health care could get in the way of Nigeria’s response                                                                                                                                                                                                                                                                                      |
| <a href="https://www.thinkglobalhealth.org/article/coronavirus-nigeria-case-community-engagement">https://www.thinkglobalhealth.org/article/coronavirus-nigeria-case-community-engagement</a>                                                                                                                                                                                                     | Coronavirus in Nigeria: A Case for Community Engagement                                                                                                                                                                                                                                                                                                                |
| <a href="https://nigeriahealthwatch.com/fragile-progress-at-the-brink%e2%80%8a-%e2%80%8acovid-19-and-the-nigerian-health-sector/#.XxmBQRQo_IU">https://nigeriahealthwatch.com/fragile-progress-at-the-brink%e2%80%8a-%e2%80%8acovid-19-and-the-nigerian-health-sector/#.XxmBQRQo_IU</a>                                                                                                           | Fragile progress at the brink - COVID-19 and the Nigerian health sector                                                                                                                                                                                                                                                                                                |
| <a href="https://nigeriahealthwatch.com/rayuwa-da-korona-how-two-local-radio-stations-are-responding-to-covid-19-in-kano-state/#.XxmBTRQo_IU">https://nigeriahealthwatch.com/rayuwa-da-korona-how-two-local-radio-stations-are-responding-to-covid-19-in-kano-state/#.XxmBTRQo_IU</a>                                                                                                             | Rayuwa Da Korona: How two local radio stations are responding to COVID-19 in Kano State                                                                                                                                                                                                                                                                                |
| <a href="https://banwo-ighodalo.com/grey-matter/policy-regulatory-measures-against-coronavirus-pandemic-nigeria?utm_source=Mondaq&amp;utm_medium=syndication&amp;utm_campaign=LinkedIn-integration">https://banwo-ighodalo.com/grey-matter/policy-regulatory-measures-against-coronavirus-pandemic-nigeria?utm_source=Mondaq&amp;utm_medium=syndication&amp;utm_campaign=LinkedIn-integration</a> | Policy & Regulatory Measures Against the Coronavirus Pandemic in Nigeria                                                                                                                                                                                                                                                                                               |
| <a href="https://reliefweb.int/report/nigeria/covid-19-forum-advocates-palliatives-almajiri-children">https://reliefweb.int/report/nigeria/covid-19-forum-advocates-palliatives-almajiri-children</a>                                                                                                                                                                                             | COVID-19: Forum advocates palliatives for Almajiri children                                                                                                                                                                                                                                                                                                            |
| <a href="https://www.cfr.org/blog/bayelsa-nigerian-government-response-covid-19-falls-short-promises">https://www.cfr.org/blog/bayelsa-nigerian-government-response-covid-19-falls-short-promises</a>                                                                                                                                                                                             | In Bayelsa, Nigerian Government Response to COVID-19 Falls Short of Promises                                                                                                                                                                                                                                                                                           |

| Source/URL                                                                                                                                                                                                                                                                                                                                                                                                                                                                                        | Main purpose                                                                                     |
|---------------------------------------------------------------------------------------------------------------------------------------------------------------------------------------------------------------------------------------------------------------------------------------------------------------------------------------------------------------------------------------------------------------------------------------------------------------------------------------------------|--------------------------------------------------------------------------------------------------|
| <a href="https://www.cfr.org/blog/nigeria-responds-first-coronavirus-case-learning-2014-ebola-response">https://www.cfr.org/blog/nigeria-responds-first-coronavirus-case-learning-2014-ebola-response</a>                                                                                                                                                                                                                                                                                         | Nigeria Responds to First Coronavirus Case, Learning From 2014 Ebola Response                    |
| <a href="https://www.cfr.org/blog/bayelsa-nigerian-government-response-covid-19-falls-short-promises">https://www.cfr.org/blog/bayelsa-nigerian-government-response-covid-19-falls-short-promises</a>                                                                                                                                                                                                                                                                                             | In Bayelsa, Nigerian Government Response to COVID-19 Falls Short of Promises                     |
| <a href="https://www.chathamhouse.org/expert/comment/coronavirus-nigeria-s-fiscal-flu">https://www.chathamhouse.org/expert/comment/coronavirus-nigeria-s-fiscal-flu</a>                                                                                                                                                                                                                                                                                                                           | Coronavirus: Nigeria's 'Fiscal Flu'                                                              |
| <a href="https://www.creativeassociatesinternational.com/stories/nigeria-program-pivots-to-support-coronavirus-prevention/">https://www.creativeassociatesinternational.com/stories/nigeria-program-pivots-to-support-coronavirus-prevention/</a>                                                                                                                                                                                                                                                 | Nigeria program pivots to support coronavirus prevention                                         |
| <a href="https://www.internationalhealthpolicies.org/feature-article/opportunities-amidst-adversity-in-nigerias-covid-19-response/">https://www.internationalhealthpolicies.org/feature-article/opportunities-amidst-adversity-in-nigerias-covid-19-response/</a>                                                                                                                                                                                                                                 | Opportunities Amidst Adversity in Nigeria's COVID-19 Response                                    |
| <a href="https://theconversation.com/covid-19-nigeria-should-prioritise-power-supply-to-health-care-facilities-134444">https://theconversation.com/covid-19-nigeria-should-prioritise-power-supply-to-health-care-facilities-134444</a>                                                                                                                                                                                                                                                           | COVID-19: Nigeria should prioritise power supply to health care facilities                       |
| -                                                                                                                                                                                                                                                                                                                                                                                                                                                                                                 |                                                                                                  |
| <a href="http://saction.org/civil-societys-role-in-nigerias-covid-19-response/">http://saction.org/civil-societys-role-in-nigerias-covid-19-response/</a>                                                                                                                                                                                                                                                                                                                                         | Civil Society's Role In Nigeria's COVID-19 Response                                              |
| <a href="https://nigeriahealthwatch.com/psychosocial-support-a-priority-for-covid-19-survivors-in-nigeria-oped/#.XyCDKhQo_IU">https://nigeriahealthwatch.com/psychosocial-support-a-priority-for-covid-19-survivors-in-nigeria-oped/#.XyCDKhQo_IU</a>                                                                                                                                                                                                                                             | Psychosocial Support a Priority for COVID-19 Survivors in Nigeria                                |
| <a href="https://gga.org/nigeria-a-pandemic-and-a-weak-health-system/">https://gga.org/nigeria-a-pandemic-and-a-weak-health-system/</a>                                                                                                                                                                                                                                                                                                                                                           | Nigeria: A pandemic and a weak health system                                                     |
| <a href="https://www.globalcitizen.org/en/content/challenges-for-health-care-workers-nigeria-covid/">https://www.globalcitizen.org/en/content/challenges-for-health-care-workers-nigeria-covid/</a>                                                                                                                                                                                                                                                                                               | 5 Challenges Facing Health Care Workers in Nigeria as They Tackle COVID-19                       |
| <a href="https://www.theafricareport.com/33300/pandemic-to-poverty-nigeria-in-the-post-covid-future/">https://www.theafricareport.com/33300/pandemic-to-poverty-nigeria-in-the-post-covid-future/</a>                                                                                                                                                                                                                                                                                             | Nigeria: Pandemic to poverty in the post-COVID future                                            |
| <a href="https://theconversation.com/nigerias-post-covid-19-recovery-plan-has-some-merit-but-it-misses-the-mark-140974">https://theconversation.com/nigerias-post-covid-19-recovery-plan-has-some-merit-but-it-misses-the-mark-140974</a>                                                                                                                                                                                                                                                         | Nigeria's post-COVID-19 recovery plan has some merit. But it misses the mark                     |
| <a href="https://www.theigc.org/blog/the-shadow-pandemic-gender-based-violence-and-covid-19/">https://www.theigc.org/blog/the-shadow-pandemic-gender-based-violence-and-covid-19/</a>                                                                                                                                                                                                                                                                                                             | The pandemic: Gender-based violence and COVID-19                                                 |
| Campbell, J., & McCaslin, J. (2020). How Nigeria has responded to COVID-19 so far. Retrieved from <a href="https://www.cfr.org/blog/how-nigeria-has-responded-covid-19-so-far">https://www.cfr.org/blog/how-nigeria-has-responded-covid-19-so-far</a>                                                                                                                                                                                                                                             | Examining committedness to combating coronavirus in Nigeria                                      |
| John, E. (2020). Covid-19 implications for public transport and shared taxi in Nigeria. Retrieved from <a href="https://www.transformative-mobility.org/news/covid-19-implications-for-public-transport-and-shared-taxi-in-nigeria">https://www.transformative-mobility.org/news/covid-19-implications-for-public-transport-and-shared-taxi-in-nigeria</a>                                                                                                                                        | Transport system in urban centres and how they are affected by Covid-19                          |
| Muggah, R., & Florida, R. (2020). Megacity slums are incubators of disease - but coronavirus response isn't helping the billion people who live in them. Retrieved from <a href="https://theconversation.com/megacity-slums-are-incubators-of-disease-but-coronavirus-response-isnt-helping-the-billion-people-who-live-in-them-138092">https://theconversation.com/megacity-slums-are-incubators-of-disease-but-coronavirus-response-isnt-helping-the-billion-people-who-live-in-them-138092</a> | Studying the fragility and resilience of cities and urban peripheries in Nigeria amidst COVID-19 |
| Ayeni, T. (2020). Coronavirus: Nigeria's varied responses to controlling COVID-19. Retrieved from <a href="https://www.theafricareport.com/27773/coronavirus-nigerias-varied-responses-to-controlling-covid-19/">https://www.theafricareport.com/27773/coronavirus-nigerias-varied-responses-to-controlling-covid-19/</a>                                                                                                                                                                         | Understanding interventions by State and Federal Governments in the fight against COVID-19       |
| Obiwulu, O., & Abia, B. (2020). Internally Displaced Persons (IDPs) as vulnerable populations at risk. Retrieved from <a href="http://cseafrica.org/covid-19-in-nigeria-internally-displaced-persons-idps-as-vulnerable-populations-at-risk/">http://cseafrica.org/covid-19-in-nigeria-internally-displaced-persons-idps-as-vulnerable-populations-at-risk/</a>                                                                                                                                   | Examining resilience of city governments against coronavirus and its effects, especially on IDPs |



| Source/URL                                                                                                                                                                                                                                                                                                                                                | Main purpose                                                                                                                                                                  |
|-----------------------------------------------------------------------------------------------------------------------------------------------------------------------------------------------------------------------------------------------------------------------------------------------------------------------------------------------------------|-------------------------------------------------------------------------------------------------------------------------------------------------------------------------------|
| Dixit, S., Ogundeji, Y., & Onwujekwe, O. (2020). How well has Nigeria responded to COVID-19? Retrieved from brookings.edu/blog/future-development/2020/07/02/how-well-has-nigeria-responded-to-covid-19/                                                                                                                                                  | Examining impacts of policies in ameliorating difficulties created by COVID-19                                                                                                |
| The first 90 days- How has Nigeria responded to the COVID-19 outbreak? #covid19naijaresponse. Chibuike Alagboso and Bashir Abubakar. 29th June, 2020. Nigeria Health Watch).                                                                                                                                                                              |                                                                                                                                                                               |
| Coronavirus - Nigeria: Shoring up COVID-19 prevention in Nigeria's border states; in Ogun state in the country's south-west where the country's first COVID-19 case was detected, they are now helping to curb the importation of COVID-19. (28th October, 2020. African Press Organization).                                                             |                                                                                                                                                                               |
| Coronavirus -Nigeria: National health sector COVID-19 pandemic response Action plan undergoes validation, to be ratified by National Council on Health; it is expected to meet the need of all actors in the health sector and also act as a single point of entry for all to the COVID-19 pandemic response. (21 June 2020. African Press Organization). | Validation of National Health Sector COVID-19 pandemic response action plan.                                                                                                  |
| COVID-19: How lockdowns affected health access in African and Asian slums. Funke Fayehun, Browyn Harris, Frances Griffiths, Narjis Rizvi, Pauline Bakibinga and Syed A.K. Shifat Ahmed. (22nd October, 2020. The Conversation).                                                                                                                           | Reports how lockdowns introduced to curb the spread of the coronavirus decreased access to all healthcare services in seven slums in Kenya, Nigeria, Bangladesh and Pakistan. |
| Medical malpractice in public health emergencies: A review of medical response to COVID-19 in Nigeria. Perchstone & Graeys. (Mondaq Business Briefing, 5th June 2020)                                                                                                                                                                                     | Observes medical malpractice and negligence to the duty of care among some medical practitioners/institutions in a pandemic situation.                                        |

## Nepal Media articles

| Date of publication (yyyy/mm/dd) | Name of news media (select from drop-down menu) | Title of news/headline                                                                                    |
|----------------------------------|-------------------------------------------------|-----------------------------------------------------------------------------------------------------------|
| 2020-08-19                       | Online Khabar (Nepali)                          | निषेधाज्ञा नमान्नेलाई प्रशासनले कारवाही गर्छ, कोभिडले पाता फर्काउँछ                                       |
| 2020-06-22                       | Online Khabar (Nepali)                          | 574.8 million spent on the fight against Corona in the Farwestern                                         |
| 2020-03-03                       | Online Khabar (Nepali)                          | Army Operation COVID-19 Nepal: From Wuhan to Kharipati                                                    |
| 2020-06-23                       | Online Khabar (Nepali)                          | Home Ministry Circular: Who come to the valley should be kept in home quarantine for 14 days              |
| 2020-03-11                       | Online Khabar (Nepali)                          | If necessary, the government can rescue from any country: Shrestha                                        |
| 2020-02-04                       | Online Khabar (Nepali)                          | Let's keep Nepalis returned from China in Parliament House: Yadav                                         |
| 2020-01-27                       | Online Khabar (Nepali)                          | Outbreak of corona virus is not frightening in Nepal, but we are still alert: Tourism Minister            |
| 2020-03-17                       | Online Khabar (Nepali)                          | Prakashman's instruction to the ward chairmen: Join in the service of the people who are scared of Corona |
| 2020-06-26                       | Online Khabar (Nepali)                          | Today, 1,200 Nepalis are coming from different countries                                                  |
| 2020-04-06                       | Kantipur (Nepali)                               | १४ दिन पुग्यो, परीक्षण भएन                                                                                |
| 2020-04-18                       | Kantipur (Nepali)                               | १५ लाख नेपालीको रोजगारी जोखिमम                                                                            |
| 2020-04-07                       | Kantipur (Nepali)                               | १७० सेट पीपीई सहयोग                                                                                       |
| 2020-04-21                       | Kantipur (Nepali)                               | १८१ जना दशगजाम                                                                                            |
| 2020-03-25                       | Kantipur (Nepali)                               | १२५ यात्रीको पहिचानपछि निगरानी                                                                            |
| 2020-04-17                       | Kantipur (Nepali)                               | रोजगारदाता कम्पनी र श्रमिकलाई १९ करोड राहत                                                                |
| 2020-04-07                       | Kantipur (Nepali)                               | रोकिएनन् महाकाली तरने भित्रिनेहरू                                                                         |
| 2020-04-05                       | Kantipur (Nepali)                               | रोगको भन्दा भोकको पीर                                                                                     |
| 2020-04-09                       | Kantipur (Nepali)                               | रू स्वास्थ्य सामग्री किन्न सेना रविभाग दुवैको प्रक्रिया सुरु                                              |
| 2020-03-24                       | Kantipur (Nepali)                               | स्वास्थ्य सामग्री आइपुग्ने छैन टुंगो                                                                      |
| 2020-03-27                       | Kantipur (Nepali)                               | स्वास्थ्य सामग्री पर्सि आइपुग्न                                                                           |
| 2020-03-27                       | Kantipur (Nepali)                               | स्थानीयस्तरमै पीपीई                                                                                       |
| 2020-03-27                       | Kantipur (Nepali)                               | सुरक्षाकर्मीलाई स्वास्थ्य सुरक्षा छैन                                                                     |
| 2020-04-04                       | Kantipur (Nepali)                               | सरकारले नसक्ने, सेनालाई सुम्पने !                                                                         |
| 2020-04-05                       | Kantipur (Nepali)                               | सेना र स्वास्थ्य सेवा विभाग दुवै खरिद प्रक्रियामा                                                         |
| 2020-04-06                       | Kantipur (Nepali)                               | सेनाले अघि बढायो स्वास्थ्य सामग्री खरिद प्रक्रिया                                                         |
| 2020-04-21                       | Kantipur (Nepali)                               | सेनाले पूर । गन्यो खरि द प्रक्रिया                                                                        |
| 2020-04-12                       | Kantipur (Nepali)                               | सेनालाई चीन, भार त रकोरियाको जवाफ                                                                         |
| 2020-03-24                       | Kantipur (Nepali)                               | संक्रमण रोकन १० करोडको कोष                                                                                |
| 2020-03-26                       | Kantipur (Nepali)                               | संक्रमणको जानकारी १४ घण्टा लुकाइयो '                                                                      |
| 2020-04-13                       | Kantipur (Nepali)                               | संक्रमित भेटिएको क्षेत्र 'सिल'                                                                            |
| 2020-04-15                       | Kantipur (Nepali)                               | संक्रमित भर्ना भएपछि अस्पताल सुनसान                                                                       |

| Date of publication (yyyy/mm/dd) | Name of news media (select from drop-down menu) | Title of news/headline                                                  |
|----------------------------------|-------------------------------------------------|-------------------------------------------------------------------------|
| 2020-04-05                       | Kantipur (Nepali)                               | संक्रमितका १०० सहयात्री सम्पर्क बाहिर                                   |
| 2020-04-07                       | Kantipur (Nepali)                               | सुदूरपश्चिममा छैनन् चिकित्सक                                            |
| 2020-04-15                       | Kantipur (Nepali)                               | सांसदको बजेट कारोना कोषमा राख्न सहमति                                   |
| 2020-04-17                       | Kantipur (Nepali)                               | सामग्री ल्याउन दुवै वाइडबडी चीनतप                                       |
| 2020-04-08                       | Kantipur (Nepali)                               | सुनसान अस्पताल                                                          |
| 2020-03-24                       | Kantipur (Nepali)                               | सीमा बन्दले पनि रोकिएन आवागमन                                           |
| 2020-04-07                       | Kantipur (Nepali)                               | सीमा क्षेत्रमा थप सुरक्षा फौज                                           |
| 2020-04-08                       | Kantipur (Nepali)                               | सीमामा ४१५ चेकप्वाइन्ट थप                                               |
| 2020-03-25                       | Kantipur (Nepali)                               | सीमामा दिनभर अलपत्र                                                     |
| 2020-04-04                       | Kantipur (Nepali)                               | २५ हजार बढी किट भन्सार मै                                               |
| 2020-04-20                       | Kantipur (Nepali)                               | 'असुरक्षाले' अर्थ समितिको भर्चुअल बैठक स्थगित                           |
| 2020-04-10                       | Kantipur (Nepali)                               | 'सांसदलाई बजेट नछुट्याऔं, र स्वास्थ्य पूर्वाधार बनाऔं                   |
| 2020-04-10                       | Kantipur (Nepali)                               | 'सांसदलाई बजेट नछुट्याऔं, स्वास्थ्य पूर्वाधार बनाऔं                     |
| 2020-04-12                       | Kantipur (Nepali)                               | 'साइकलबाट भर्दा रगतले सारी भिजेको हुन्थ्यो                              |
| 2020-08-21                       | Online Khabar (Nepali)                          | '७७ जिल्लामै पीसीआर परीक्षणको व्यवस्था मिलाऊ'                           |
| 2020-03-27                       | Himalayan Times (English)                       | 'Announce relief package for daily wage earners'                        |
| 2020-03-26                       | Kantipur (Nepali)                               | 'देशभर एक लाख ३० हजार अट्ने क्वारन्टाइन्ने '                            |
| 2020-06-27                       | Himalayan Times (English)                       | 'Covid victims deserve dignified last rites'                            |
| 2020-07-19                       | Himalayan Times (English)                       | 'Enough is Enough' campaigners begin hunger strike once again           |
| 2020-03-19                       | Himalayan Times (English)                       | 'Govt serious about COVID-19 pandemic'                                  |
| 2020-03-26                       | Himalayan Times (English)                       | 'Govt working to ensure supply of daily essentials'                     |
| 2020-03-17                       | Himalayan Times (English)                       | 'Health desk at Rani border ineffective                                 |
| 2020-03-15                       | Himalayan Times (English)                       | 'Hospitality sector to be hit entire year'                              |
| 2020-04-17                       | Kantipur (Nepali)                               | 'प्रवासी फर्कने व्यवस्था मिलाऊ'                                         |
| 2020-06-28                       | Himalayan Times (English)                       | 'Nepal needs to break free from the shackles of the past', Page 2       |
| 2020-02-12                       | Himalayan Times (English)                       | 'Preparation to quarantine evacuees complete'                           |
| 2020-05-03                       | Himalayan Times (English)                       | 'Quarantined people can suffer mental health problems'                  |
| 2020-07-09                       | Himalayan Times (English)                       | 'Respect rights of vulnerable people'                                   |
| 2020-04-06                       | Kantipur (Nepali)                               | 'चीनले नेपाललाई सामग्री उपलब्ध गराउँछ'                                  |
| 2020-06-12                       | Himalayan Times (English)                       | 'Send critical patients to specialised hospitals'                       |
| 2020-05-05                       | Himalayan Times (English)                       | 'Test, trace, test to arrest COVID transmission'                        |
| 2020-06-01                       | Himalayan Times (English)                       | 'Trace, test, improve quarantines, increase capacity of health centres' |

| Date of publication (yyyy/mm/dd) | Name of news media (select from drop-down menu) | Title of news/headline                                                  |
|----------------------------------|-------------------------------------------------|-------------------------------------------------------------------------|
| 2020-06-01                       | Himalayan Times (English)                       | 'Trace, test, improve quarantines, increase capacity of health centres' |
| 2020-04-06                       | Kantipur (Nepali)                               | 'गम्भीर बिरामीले उपचार पाएनन्'                                          |
| 2020-04-15                       | Kantipur (Nepali)                               | 'गरिवको कोही नहुंदो रहेछ'                                               |
| 2020-03-27                       | Kantipur (Nepali)                               | 'शंकास्पद बिरामी जाँच्दा पीपीई चाहिँदैन'                                |
| 2020-06-08                       | Kantipur (Nepali)                               | 'अब पुँजीबजार खोलनुपर्छ'                                                |
| 2020-04-16                       | Online Khabar (Nepali)                          | 'अब लकडाउनको मोडल फरक हुन्छ, आशंकित समुदाय सिल हुनसक्छ'                 |
| 2020-05-12                       | Kantipur (Nepali)                               | 'अर्थतन्त्र आफैँ पुनर्निर्देशित हुँदैछ'                                 |
| 2020-07-03                       | Kantipur (Nepali)                               | 'अर्थतन्त्रको मनोबल बढाउने नीति'                                        |
| 2020-05-22                       | Kantipur (Nepali)                               | 'आगामी बजेटमा पौने दुई खर्बको राहत'                                     |
| 2020-05-19                       | Kantipur (Nepali)                               | 'आरडीटी किटले संक्रमण विस्तारमा सघाउँछ'                                 |
| 2020-08-24                       | Online Khabar (Nepali)                          | 'उपत्यकामा १५ हजार संक्रमित हुनसक्छन्'                                  |
| 2020-08-10                       | Online Khabar (Nepali)                          | 'उपत्यकामा सार्वजनिक यातायात र अत्यावश्यकबाहेकका सेवा रोकौं'            |
| 2020-06-20                       | Kantipur (Nepali)                               | 'कमजोर अर्थतन्त्रलाई भी सेपमा रिकभरी गर्छौं'                            |
| 2020-06-27                       | Kantipur (Nepali)                               | 'काम गरिखान पाऊँ'                                                       |
| 2020-08-16                       | Kantipur (Nepali)                               | 'कामदारले उपचार पाएनन्'                                                 |
| 2020-05-23                       | Online Khabar (Nepali)                          | 'कि डाक्टर र नर्स देऊ कि कोरोना संक्रमितको उपचार गर'                    |
| 2020-07-16                       | Kantipur (Nepali)                               | 'कोरोना खर्चको लेखापरीक्षण छिटै हुन्छ'                                  |
| 2020-08-17                       | Kantipur (Nepali)                               | 'कोरोना नजिकै छैन सोच्नु गलत'                                           |
| 2020-08-31                       | Kantipur (Nepali)                               | 'कोरोना लागे बाँचिएला, खाने नपाए कसरी बाँच्ने?'                         |
| 2020-06-02                       | Kantipur (Nepali)                               | 'कोरोना सँगसँगै अघि बढ्नुपर्छ'                                          |
| 2020-04-29                       | Online Khabar (Nepali)                          | 'कोरोनाको उपचार गर्ने भएपछि अरू बिरामी झन् सुरक्षित छन्'                |
| 2020-06-12                       | Kantipur (Nepali)                               | 'कोरोनाले मर्छ कि भुकले'                                                |
| 2020-05-21                       | Kantipur (Nepali)                               | 'क्वारेन्टाइन व्यवस्थित गर्नु, परीक्षण बढाउनु'                          |
| 2020-06-01                       | Kantipur (Nepali)                               | 'क्वारेन्टाइनका सबैलाई परीक्षण गर्नु'                                   |
| 2020-06-13                       | Kantipur (Nepali)                               | 'खर्च सार्वजनिक गर्छौं, जोखिमप्रति सचेत होऔं'                           |
| 2020-06-03                       | Kantipur (Nepali)                               | 'गर्भवती र सुत्केरीलाई सेवा देऊ'                                        |
| 2020-07-17                       | Kantipur (Nepali)                               | 'गुणस्तर नजाँची सेनिटाइजर बेच्न नदेऊ'                                   |
| 2020-03-23                       | Kantipur (Nepali)                               | 'चिकित्सक नै असुरक्षित'                                                 |
| 2020-03-23                       | Kantipur (Nepali)                               | 'चिनियाँ मोडल' अपनाउने तयारी                                            |
| 2020-07-11                       | Kantipur (Nepali)                               | 'छिनछिनमा दुर्व्यवहार सहनुपर्यो'                                        |
| 2020-08-01                       | Kantipur (Nepali)                               | 'ठूलाबडा' नै लगाउँदैनन् मास्क                                           |
| 2020-05-09                       | Kantipur (Nepali)                               | 'ढुकुटी रित्तियो, अब थप सकिन्न'                                         |
| 2020-08-01                       | Kantipur (Nepali)                               | 'तलब माग्दा निकालियो'                                                   |
| 2020-07-19                       | Kantipur (Nepali)                               | 'नीति छिटो कार्यान्वयन होस्'                                            |
| 2020-06-18                       | Kantipur (Nepali)                               | 'पल्टनबाट फोन आउन थाल्यो'                                               |
| 2020-05-08                       | Kantipur (Nepali)                               | 'पारि रहेकालाई झिकाइदेऊ'                                                |
| 2020-06-12                       | Kantipur (Nepali)                               | 'पीसीआर रिपोर्ट नेगेटिभ आए मात्रै घर फिर्ता'                            |
| 2020-07-29                       | Kantipur (Nepali)                               | 'पीसीआरको दायरा घटाउने मनसाय छैन'                                       |
| 2020-06-08                       | Kantipur (Nepali)                               | 'पुनः परीक्षण नगरी पठाउनु घातक'                                         |
| 2020-05-17                       | Kantipur (Nepali)                               | 'पुनरुत्थान केन्द्रित नीति आएन'                                         |
| 2020-05-12                       | Kantipur (Nepali)                               | 'फजुल खर्च घटाऔं, ठूला आयोजनालाई निरन्तरता दिऊँ'                        |

| Date of publication (yyyy/mm/dd) | Name of news media (select from drop-down menu) | Title of news/headline                                             |
|----------------------------------|-------------------------------------------------|--------------------------------------------------------------------|
| 2020-07-03                       | Kantipur (Nepali)                               | 'बढी मारमा खेल पत्रकारिता'                                         |
| 2020-06-02                       | Kantipur (Nepali)                               | 'बन्द प्रशिक्षण तत्काल सुरु गरौं'                                  |
| 2020-03-17                       | Kantipur (Nepali)                               | 'बिनामास्क गाडी नचढनुस्'                                           |
| 2020-08-03                       | Kantipur (Nepali)                               | 'भयावह अवस्था अब आउछ'                                              |
| 2020-05-05                       | Kantipur (Nepali)                               | 'मानव जीवन सबैभन्दा महत्त्वपूर्ण'                                  |
| 2020-05-20                       | Kantipur (Nepali)                               | 'मापदण्ड पुर्याए होम कारेन्टाइन पनि सुरक्षित'                      |
| 2020-06-14                       | Kantipur (Nepali)                               | 'मास्क लगाए सुरक्षित हुन सकिन्छ'                                   |
| 2020-07-26                       | Kantipur (Nepali)                               | 'मृत्युदर फरक पर्न सक्छ'                                           |
| 2020-06-11                       | Kantipur (Nepali)                               | 'मैले भनेपछि भैगो ता!'                                             |
| 2020-05-05                       | Kantipur (Nepali)                               | 'राजनीतिमा लाज लाग्ने कुरा भइरहेको छ'                              |
| 2020-06-15                       | Kantipur (Nepali)                               | 'राहत र उपचारमा बेवास्ता भयो'                                      |
| 2020-06-17                       | Kantipur (Nepali)                               | 'रोकथाममा गम्भीर होऊ'                                              |
| 2020-06-12                       | Kantipur (Nepali)                               | 'लकडाउन खुलेपछि मात्रै कर तिर्न लगाउनु'                            |
| 2020-06-02                       | Kantipur (Nepali)                               | 'लकडाउनबारे पुनर्विचार होस्'                                       |
| 2020-05-08                       | Kantipur (Nepali)                               | 'लकडाउनले संक्रमणलाई धकेल्यो, रोकेन'                               |
| 2020-06-11                       | Kantipur (Nepali)                               | 'लडकाउन गरिरहे पनि बढी संक्रमित देखिन सक्छन्'                      |
| 2020-07-11                       | Kantipur (Nepali)                               | 'वित्तीय सुविधा नपाए गाडी चलाउँदैनौं'                              |
| 2020-05-26                       | Kantipur (Nepali)                               | 'विदेशका नेपालीलाई प्राथमिकता हेरेर ल्याउँछौं'                     |
| 2020-04-07                       | Online Khabar (Nepali)                          | 'विदेशबाट आएकाहरु स्वघोषणा गरेर स्वास्थ्यकर्मीको सम्पर्कमा जानुस्' |
| 2020-05-05                       | Kantipur (Nepali)                               | 'विद्यार्थी भर्ना नलिनू'                                           |
| 2020-05-04                       | Kantipur (Nepali)                               | 'विद्यार्थी भर्ना वैशाख २६ बाट'                                    |
| 2020-05-28                       | Kantipur (Nepali)                               | 'संक्रमण भयावह हुने जोखिम'                                         |
| 2020-06-03                       | Kantipur (Nepali)                               | 'संक्रमण व्यापक भए सामूहिक प्रतिरक्षा'                             |
| 2020-05-31                       | Kantipur (Nepali)                               | 'संक्रमणका केन्द्र' कारेन्टाइन                                     |
| 2020-07-09                       | Kantipur (Nepali)                               | 'संक्रमित बढे भन्टिलेटर र आईसीयू पुग्दैन'                          |
| 2020-03-18                       | Kantipur (Nepali)                               | 'सबै सवारी चलाऔं'                                                  |
| 2020-06-07                       | Kantipur (Nepali)                               | 'सरकार बाँसुरी बजाएर नबसोस्'                                       |
| 2020-05-20                       | Online Khabar (Nepali)                          | 'सामान्य संक्रमित' लाई अस्पताल बाहिरै राखिने                       |
| 2020-05-12                       | Kantipur (Nepali)                               | 'सीमामा रोकदा संक्रमण भित्रभित्रै फैलिने डर'                       |
| 2020-06-01                       | Kantipur (Nepali)                               | 'सुक्रेरी र गर्भवती बचाऊ'                                          |
| 2020-04-05                       | Online Khabar (Nepali)                          | 'सुदूरपश्चिम उच्च जोखिममा छ, राष्ट्रिय संकट आउन सक्छ'              |
| 2020-06-11                       | Kantipur (Nepali)                               | 'स्वास्थ्य सामग्री खरिद पारदर्शी'                                  |
| 2020-04-25                       | Kantipur (Nepali)                               | 'स्वास्थ्य सुरक्षा अपनाएर लकडाउन खुकुलो पार्ने तयारी'              |
| 2020-07-07                       | Kantipur (Nepali)                               | 'स्वास्थ्यकर्मीको सुविधा नकाट'                                     |
| 2020-06-03                       | Kantipur (Nepali)                               | 'होटल टिकाउने बजेट आएन'                                            |
| 2020-04-06                       | Kantipur (Nepali)                               | 'यापिड र पीसीआर किटबाट परीक्षण गरिन                                |
| 2020-04-15                       | Kantipur (Nepali)                               | 'यापिड किटबाट ५६ जिल्लामा परीक्षण                                  |
| 2020-04-07                       | Kantipur (Nepali)                               | 'यापिड किटबाटै परीक्षण तयार                                        |
| 2020-04-17                       | Kantipur (Nepali)                               | 'क्रमितसँगै आएका युवक एक महिनापछि क्वारेन्टाइनमा                   |
| 2020-04-23                       | Kantipur (Nepali)                               | 'राज्यले अपमान मात्र गयो'                                          |
| 2020-04-06                       | Kantipur (Nepali)                               | 'स्वास्थ्यकर्मीलाई हौसला चाहिएको छ'                                |
| 2020-04-18                       | Kantipur (Nepali)                               | 'सरकार निम्छाको दर्शक भयो'                                         |
| 2020-04-14                       | Kantipur (Nepali)                               | 'सांसदको बजेटले अस्पताल बनाऔं'                                     |

| Date of publication (yyyy/mm/dd) | Name of news media (select from drop-down menu) | Title of news/headline                                                  |
|----------------------------------|-------------------------------------------------|-------------------------------------------------------------------------|
| 2020-04-17                       | Kantipur (Nepali)                               | 'बसौ खाना छैन, जाऔं दिदैन'                                              |
| 2020-03-24                       | Kantipur (Nepali)                               | 'एकअर्काबाट दूरी राखौं, घरमै बसौ'                                       |
| 2020-04-22                       | Himalayan Times (English)                       | 1,616 swabs tested                                                      |
| 2020-07-14                       | Himalayan Times (English)                       | 1,705 patients of coronavirus disease recover in a day                  |
| 2020-05-20                       | Online Khabar (Nepali)                          | १० जनामा कोरोना भेटिएपछि कचनकवलका ५ वडा सिल                             |
| 2020-06-10                       | Kantipur (Nepali)                               | १० दिनसम्म रिपोर्ट नआएपछि २४ जना भागे                                   |
| 2020-06-15                       | Himalayan Times (English)                       | 11 COVID-19 patients sent home before test reports in Kanchanpur        |
| 2020-04-07                       | Himalayan Times (English)                       | 11 discharged from isolation, 69 test negative for COVID-19             |
| 2020-06-02                       | Himalayan Times (English)                       | 12 migrants returning from India killed in accident                     |
| 2020-08-30                       | Himalayan Times (English)                       | 12 succumb to coronavirus, 884 new cases                                |
| 2020-03-25                       | Himalayan Times (English)                       | 125 who flew with COVID-19 patient traced                               |
| 2020-08-11                       | Kantipur (Nepali)                               | १२९ जनाले गरे कोरोना बिमा दाबी                                          |
| 2020-03-14                       | Himalayan Times (English)                       | 13,000 people screened for coronavirus in Gaur                          |
| 2020-03-27                       | Himalayan Times (English)                       | 137 foreigners stranded on trekking trails rescued in two days          |
| 2020-04-13                       | Online Khabar (Nepali)                          | १३औं संक्रमितको रिपोर्ट : र्यापिड टेस्टमा नेगेटिभ, पीसीआर टेस्ट पोजेटिभ |
| 2020-08-31                       | Himalayan Times (English)                       | 14 deaths in 24 hours                                                   |
| 2020-06-10                       | Himalayan Times (English)                       | 14 health workers infected with coronavirus so far                      |
| 2020-08-05                       | Himalayan Times (English)                       | 14 hospitals for swab collection                                        |
| 2020-05-13                       | Himalayan Times (English)                       | 14 quarantined                                                          |
| 2020-06-24                       | Kantipur (Nepali)                               | १४ दिन कटाउँदै, पठाउँदै                                                 |
| 2020-02-25                       | Kantipur (Nepali)                               | १४ दिन कारेन्टाइन 'पर्याप्त' होइन                                       |
| 2020-03-07                       | Himalayan Times (English)                       | 15 health desks to be set up in Saptari district                        |
| 2020-05-05                       | Himalayan Times (English)                       | 15 Nepalgunj COVID patients admitted to hospital for treatment          |
| 2020-03-19                       | Kantipur (Nepali)                               | १५ एयरलाइन्सका उडान रोकिने                                              |
| 2020-03-16                       | Kantipur (Nepali)                               | १५५ आइसोलेटेड शय्या तयार, २३५ आईसीयू थपिने                              |
| 2020-04-20                       | Himalayan Times (English)                       | 15-point suggestion put forth to manage COVID-19 situation              |
| 2020-08-02                       | Himalayan Times (English)                       | 161 beat COVID-19                                                       |

| Date of publication (yyyy/mm/dd) | Name of news media (select from drop-down menu) | Title of news/headline                                                                                                               |
|----------------------------------|-------------------------------------------------|--------------------------------------------------------------------------------------------------------------------------------------|
| 2020-02-03                       | Himalayan Times (English)                       | 180 Nepalis in China plead to return home Govt likely to airlift them this week, but evacuee quarantine location yet to be finalised |
| 2020-03-13                       | Himalayan Times (English)                       | 19-bed isolation ward in Bharatpur Hospital                                                                                          |
| 2020-05-24                       | Kantipur (Nepali)                               | २ दिनमै भित्रिए साढे १० हजार                                                                                                         |
| 2020-07-02                       | Kantipur (Nepali)                               | २ हजार ६१ बालबालिकामा संक्रमण                                                                                                        |
| 2020-06-04                       | Himalayan Times (English)                       | 200-plus cases in a day, third day in a row                                                                                          |
| 2020-04-12                       | Himalayan Times (English)                       | 21 swab samples sent to Pokhara for test                                                                                             |
| 2020-06-08                       | Kantipur (Nepali)                               | २१३ संक्रमित थपिए, निको हुने ४६७                                                                                                     |
| 2020-05-24                       | Himalayan Times (English)                       | 22 health workers, including 5 doctors, to be kept in isolation                                                                      |
| 2020-05-15                       | Kantipur (Nepali)                               | २२ जिल्लामा पुग्यो संक्रमण                                                                                                           |
| 2020-07-05                       | Himalayan Times (English)                       | 232 new COVID-19 cases detected                                                                                                      |
| 2020-05-13                       | Kantipur (Nepali)                               | २४ घण्टामा ७ हजार जना उपत्यका भित्रिए                                                                                                |
| 2020-04-23                       | Himalayan Times (English)                       | 249 undergo RDT                                                                                                                      |
| 2020-06-02                       | Himalayan Times (English)                       | 25 COVID-19 patients recover in Bhairahawa                                                                                           |
| 2020-04-26                       | Himalayan Times (English)                       | 25 quarantined                                                                                                                       |
| 2020-05-29                       | Online Khabar (Nepali)                          | २५ जनाका लागि कारेन्टिनको तयारी, संक्रमित नै सय पुगे                                                                                 |
| 2020-03-19                       | Kantipur (Nepali)                               | २५ जनाभन्दा बढी भेला हुन प्रतिबन्ध                                                                                                   |
| 2020-06-12                       | Himalayan Times (English)                       | 250 more diagnosed with novel coronavirus disease                                                                                    |
| 2020-03-29                       | Himalayan Times (English)                       | 254 foreign returnees in home quarantine                                                                                             |
| 2020-07-09                       | Himalayan Times (English)                       | 255 more diagnosed with coronavirus in Nepal, 253 discharged                                                                         |
| 2020-04-12                       | Himalayan Times (English)                       | 259 coronavirus suspects in Sudurpaschim test negative                                                                               |
| 2020-06-20                       | Himalayan Times (English)                       | 26 coronavirus patients discharged                                                                                                   |
| 2020-06-05                       | Himalayan Times (English)                       | 27 COVID-19 patients discharged                                                                                                      |
| 2020-07-06                       | Himalayan Times (English)                       | 27 more diagnosed with COVID in Kathmandu                                                                                            |
| 2020-05-24                       | Himalayan Times (English)                       | 27 patients undergoing COVID-19 treatment in Kathmandu valley                                                                        |
| 2020-06-30                       | Kantipur (Nepali)                               | 270 Shops in Thamel Area are Displaced                                                                                               |
| 2020-06-14                       | Himalayan Times (English)                       | 273 new cases of coronavirus today                                                                                                   |
| 2020-06-06                       | Himalayan Times (English)                       | 278 more infected with novel coronavirus disease today                                                                               |

| Date of publication (yyyy/mm/dd) | Name of news media (select from drop-down menu) | Title of news/headline                                      |
|----------------------------------|-------------------------------------------------|-------------------------------------------------------------|
| 2020-06-11                       | Himalayan Times (English)                       | 279 more test positive for novel coronavirus                |
| 2020-06-27                       | Himalayan Times (English)                       | 27th fatality                                               |
| 2020-06-10                       | Himalayan Times (English)                       | 28 coronavirus patients recover                             |
| 2020-03-05                       | Himalayan Times (English)                       | 28 isolation wards prepared in Province 1                   |
| 2020-05-28                       | Kantipur (Nepali)                               | २८ टन स्वास्थ्य सामग्री आउँदै                               |
| 2020-06-28                       | Himalayan Times (English)                       | 28th fatality                                               |
| 2020-06-22                       | Himalayan Times (English)                       | 3 more Nepalis die of COVID-19 in Qatar                     |
| 2020-04-21                       | Kantipur (Nepali)                               | घर फर्किदा २ जनाको बाटैमा मृत्यु                            |
| 2020-04-04                       | Kantipur (Nepali)                               | घर फर्कन ज्यानको बाजी                                       |
| 2020-04-16                       | Kantipur (Nepali)                               | घर पुग्ने आत्तुरीले महाकालीमा हेलिए                         |
| 2020-04-22                       | Kantipur (Nepali)                               | घरजानेकोलको                                                 |
| 2020-06-12                       | Himalayan Times (English)                       | 30 patients recover                                         |
| 2020-04-30                       | Himalayan Times (English)                       | 30 quarantined                                              |
| 2020-04-17                       | Online Khabar (Nepali)                          | ३० हजार र्यापिड टेस्ट किट पठाइयो                            |
| 2020-06-19                       | Kantipur (Nepali)                               | ३० हजार संक्रमितका लागि सामग्री जोहो                        |
| 2020-05-22                       | Himalayan Times (English)                       | 300-bed quarantines to be set up in Jajarkot                |
| 2020-03-22                       | Himalayan Times (English)                       | 30-bed isolation ward in Jajarkot District Hospital         |
| 2020-07-03                       | Himalayan Times (English)                       | 31 more infected with COVID-19 in valley                    |
| 2020-06-12                       | Himalayan Times (English)                       | 31 recovered patients discharged in Karnali                 |
| 2020-06-26                       | Kantipur (Nepali)                               | ३१२ जना डिस्चार्ज                                           |
| 2020-06-09                       | Himalayan Times (English)                       | 314 new COVID-19 cases come to light                        |
| 2020-06-07                       | Himalayan Times (English)                       | 323 new COVID cases, two die of infection                   |
| 2020-06-21                       | Himalayan Times (English)                       | 331 new coronavirus cases detected                          |
| 2020-04-26                       | Kantipur (Nepali)                               | ३५ आए, ३६ गए                                                |
| 2020-08-23                       | Online Khabar (Nepali)                          | ३५ जिल्लामा पूर्ण र १२ मा आंशिक निषेधाज्ञा                  |
| 2020-06-02                       | Kantipur (Nepali)                               | ३५ हजारको टिकटलाई १ लाख                                     |
| 2020-07-07                       | Himalayan Times (English)                       | 35th fatality                                               |
| 2020-03-26                       | Kantipur (Nepali)                               | घटून थाल्यो आयात                                            |
| 2020-06-17                       | Kantipur (Nepali)                               | ४ जिल्ला उच्च जोखिममा                                       |
| 2020-04-26                       | Online Khabar (Nepali)                          | ४० हजार र्यापिड टेस्ट भइसक्यो, अझै परीक्षण भएको छैन गुणस्तर |



| Date of publication (yyyy/mm/dd) | Name of news media (select from drop-down menu) | Title of news/headline                                                                |
|----------------------------------|-------------------------------------------------|---------------------------------------------------------------------------------------|
| 2020-06-22                       | Himalayan Times (English)                       | 421 more hospitalised with novel coronavirus Country's COVID count rockets past 9,000 |
| 2020-04-18                       | Himalayan Times (English)                       | 421 prisoners from across the country released amid coronavirus scare                 |
| 2020-06-15                       | Himalayan Times (English)                       | 425 more diagnosed with coronavirus                                                   |
| 2020-05-26                       | Himalayan Times (English)                       | 43 corona patients discharged                                                         |
| 2020-08-28                       | Kantipur (Nepali)                               | ४५५ सेनिटाइजर गुणस्तरहीन'                                                             |
| 2020-07-08                       | Kantipur (Nepali)                               | ४६ प्रतिशत निको भए                                                                    |
| 2020-06-29                       | Himalayan Times (English)                       | 463 more test positive for novel coronavirus                                          |
| 2020-06-30                       | Himalayan Times (English)                       | 476 more diagnosed with coronavirus                                                   |
| 2020-07-03                       | Himalayan Times (English)                       | 49-day-old infant dies of the virus                                                   |
| 2020-03-15                       | Kantipur (Nepali)                               | ५ अस्पताल कोरोना केन्द्रित गरिने                                                      |
| 2020-03-23                       | Himalayan Times (English)                       | 5,000-bed quarantine facilities to be set up in valley                                |
| 2020-05-04                       | Kantipur (Nepali)                               | ५० प्रतिशतभन्दा बढी पारिश्रमिक दिन कठिन'                                              |
| 2020-05-11                       | Himalayan Times (English)                       | 500 undergo RDT, 25 PCR tests in Bhojpur                                              |
| 2020-08-26                       | Online Khabar (Nepali)                          | ५०० बेडको आइसोलेसन सेन्टर बनाउन सांसदको नेतृत्वमा समिति                               |
| 2020-05-13                       | Kantipur (Nepali)                               | ५१ दिनपछि खुल्यो सेयर बजार                                                            |
| 2020-06-23                       | Himalayan Times (English)                       | 535 more diagnosed with contagion                                                     |
| 2020-04-15                       | Himalayan Times (English)                       | 54 people who came into contact with COVID-19 patient quarantined                     |
| 2020-06-28                       | Himalayan Times (English)                       | 554 new COVID-19 cases reported across country                                        |
| 2020-04-20                       | Kantipur (Nepali)                               | छोराछोरी आऊ भन्छन्, कसरी जानुं?'                                                      |
| 2020-05-28                       | Kantipur (Nepali)                               | ६ लाखको कोरोना परीक्षण गर्न ६ महिना लाग्ने                                            |
| 2020-08-28                       | Himalayan Times (English)                       | 6,000 more beds for COVID patients in valley                                          |
| 2020-02-10                       | Online Khabar (Nepali)                          | 60 health workers will be deployed for supervision of students brought from China     |
| 2020-05-15                       | Himalayan Times (English)                       | 600 swab samples collected from Kalimati market                                       |
| 2020-03-23                       | Himalayan Times (English)                       | 60-bed quarantine coming up in Dhankuta                                               |
| 2020-03-24                       | Himalayan Times (English)                       | 62 isolation wards prepared in Karnali                                                |
| 2020-08-23                       | Himalayan Times (English)                       | 634 new cases of coronavirus, nine succumb to infection                               |
| 2020-03-22                       | Himalayan Times (English)                       | 64 Nepalis quarantined for violating immigration rules                                |

| Date of publication (yyyy/mm/dd) | Name of news media (select from drop-down menu) | Title of news/headline                                   |
|----------------------------------|-------------------------------------------------|----------------------------------------------------------|
| 2020-07-29                       | Himalayan Times (English)                       | 65-year-old dies                                         |
| 2020-07-19                       | Kantipur (Nepali)                               | ६६% निको                                                 |
| 2020-08-03                       | Himalayan Times (English)                       | 68-year-old woman from Birgunj dies                      |
| 2020-02-05                       | Kantipur (Nepali)                               | ७ लाख मास्क निर्यात                                      |
| 2020-03-05                       | Kantipur (Nepali)                               | ७० हजार विदेशी यात्रु घटे                                |
| 2020-06-19                       | Kantipur (Nepali)                               | ७०५ पत्रकारको कोरोना बिमा                                |
| 2020-03-18                       | Himalayan Times (English)                       | 70-bed hospital to be readied in 72 hrs                  |
| 2020-03-11                       | Online Khabar (Nepali)                          | 71 workers working at Pokhara Airport in self-quarantine |
| 2020-03-11                       | Kantipur (Nepali)                               | ७१ चिनियाँ कारेन्टाइनमा                                  |
| 2020-04-24                       | Himalayan Times (English)                       | 72 kept in quarantine                                    |
| 2020-03-20                       | Kantipur (Nepali)                               | ७२ घण्टामै ५० शय्याको अस्पताल                            |
| 2020-06-16                       | Kantipur (Nepali)                               | ७३ जिल्लामा सार्वजनिक सेवा सुरु                          |
| 2020-06-08                       | Kantipur (Nepali)                               | ७५ दिनपछि खुल्यो सुनचाँदी बजार                           |
| 2020-06-20                       | Himalayan Times (English)                       | 75-year-old lung cancer patient recovers                 |
| 2020-06-04                       | Himalayan Times (English)                       | 76-year-old man succumbs to the virus                    |
| 2020-04-27                       | Himalayan Times (English)                       | 77 quarantined                                           |
| 2020-08-23                       | Kantipur (Nepali)                               | ७८ हजार श्रमिक स्वदेश फिर्ने प्रतीक्षामा                 |
| 2020-04-22                       | Kantipur (Nepali)                               | डस्चार्ज भए सुदूरपश्चिमका पहिलो संक्रमित                 |
| 2020-03-14                       | Kantipur (Nepali)                               | ८०% संक्रमित विशेष उपचारबिना निको                        |
| 2020-07-01                       | Kantipur (Nepali)                               | 800 Swaps are on Queue as Testing Mechine is Broken      |
| 2020-04-21                       | Himalayan Times (English)                       | 81 per cent COVID patients in Nepal asymptomatic         |
| 2020-07-01                       | Himalayan Times (English)                       | 83-year-old beats coronavirus                            |
| 2020-03-22                       | Himalayan Times (English)                       | 90 beds for COVID-19 suspects in Panchthar               |
| 2020-07-01                       | Kantipur (Nepali)                               | 90 Percent Shopping Malls in Valley Start Operating      |
| 2020-07-09                       | Himalayan Times (English)                       | 92pc COVID patients recover, return home in Rautahat     |
| 2020-05-30                       | Himalayan Times (English)                       | 97 quarantined                                           |
| 2020-07-10                       | Kantipur (Nepali)                               | ९९.७५ कोरोना संक्रमितमा लक्षण छैन                        |
| 2020-05-01                       | Kantipur (Nepali)                               | A Woman Died In Isolation                                |
| 2020-04-11                       | Kantipur (Nepali)                               | बढाइदै परीक्षण                                           |
| 2020-06-30                       | Himalayan Times (English)                       | Aanbukhairani RM closed for a week                       |
| 2020-06-05                       | Himalayan Times (English)                       | Aathrai RM sealed                                        |

| <b>Date of publication (yyyy/mm/dd)</b> | <b>Name of news media (select from drop-down menu)</b> | <b>Title of news/headline</b>                                                                       |
|-----------------------------------------|--------------------------------------------------------|-----------------------------------------------------------------------------------------------------|
| 2020-06-23                              | Online Khabar (Nepali)                                 | About 260 million rupees has been spent on corona prevention in Province 1                          |
| 2020-04-19                              | Himalayan Times (English)                              | Action taken against ambulance driver                                                               |
| 2020-07-30                              | Himalayan Times (English)                              | Activist lih refuses to be hospitalised                                                             |
| 2020-08-09                              | Himalayan Times (English)                              | Activist lih to end hunger strike today                                                             |
| 2020-06-12                              | Himalayan Times (English)                              | Activists fear quarantines turning into COVID hotspots                                              |
| 2020-07-02                              | Himalayan Times (English)                              | ADB approves \$3m grant from APDRF                                                                  |
| 2020-06-19                              | Himalayan Times (English)                              | ADB, UNICEF join hands to supply medical equipment                                                  |
| 2020-07-09                              | Himalayan Times (English)                              | Adequate social security key to minimise impact of COVID-19, says PM Oli                            |
| 2020-04-23                              | Kantipur (Nepali)                                      | बाडे, उसैबाट डर                                                                                     |
| 2020-04-20                              | Kantipur (Nepali)                                      | बालबच्चा बचाउन घस्रिदै घरतिर                                                                        |
| 2020-03-25                              | Kantipur (Nepali)                                      | बागलुङ र सप्तरीमा सेना परिचालन                                                                      |
| 2020-06-11                              | Himalayan Times (English)                              | Agitated valley traders protest as government halts market operation                                |
| 2020-06-03                              | Himalayan Times (English)                              | AHW attacked                                                                                        |
| 2020-04-11                              | Himalayan Times (English)                              | All COVID-19 patients in Nepal normal                                                               |
| 2020-04-26                              | Himalayan Times (English)                              | All flights to remain suspended till May 15                                                         |
| 2020-07-21                              | Himalayan Times (English)                              | All flights to resume from August 17                                                                |
| 2020-04-29                              | Himalayan Times (English)                              | All Gandaki districts to have ICU                                                                   |
| 2020-08-25                              | Himalayan Times (English)                              | All local govts inside valley to remain shut until August 31                                        |
| 2020-05-01                              | Kantipur (Nepali)                                      | All Migrants are Returned from Employment                                                           |
| 2020-03-11                              | Online Khabar (Nepali)                                 | All political parties are with government in the fight against Corona                               |
| 2020-07-01                              | Online Khabar (Nepali)                                 | All the offices of the Rural municipality are closed after the health workers confirmed with corona |
| 2020-06-04                              | Himalayan Times (English)                              | Alternative approaches to dealing with coronavirus                                                  |
| 2020-04-08                              | Himalayan Times (English)                              | Ambulance drivers at risk of contracting COVID-19                                                   |
| 2020-04-17                              | Himalayan Times (English)                              | Ambulance stopped                                                                                   |
| 2020-01-27                              | Himalayan Times (English)                              | American of Nepali origin screened at TIA, admitted to STIDH                                        |
| 2020-06-30                              | Kantipur (Nepali)                                      | An Alarming Rate of Suicide                                                                         |

| Date of publication (yyyy/mm/dd) | Name of news media (select from drop-down menu) | Title of news/headline                                                              |
|----------------------------------|-------------------------------------------------|-------------------------------------------------------------------------------------|
| 2020-07-16                       | Himalayan Times (English)                       | Another 697 recover from respiratory contagion                                      |
| 2020-01-27                       | Online Khabar (Nepali)                          | Another corona virus infection in Nepal                                             |
| 2020-04-19                       | Kantipur (Nepali)                               | aofgd} ;Gb]x                                                                        |
| 2020-06-24                       | Himalayan Times (English)                       | Apex court stays COVID quarantine guideline                                         |
| 2020-06-16                       | Himalayan Times (English)                       | APN's initiative                                                                    |
| 2020-04-28                       | Himalayan Times (English)                       | Area sealed after COVID case found                                                  |
| 2020-08-22                       | Himalayan Times (English)                       | Arrange 10,000 ventilators, House panel tells govt                                  |
| 2020-04-25                       | Himalayan Times (English)                       | ASI injured in dispute over relief distribution in Debgaun                          |
| 2020-06-26                       | Himalayan Times (English)                       | Asymptomatic cases being sent home in Bajura district                               |
| 2020-04-01                       | Himalayan Times (English)                       | Attending corona patients a must for private hospitals: SC                          |
| 2020-07-10                       | Himalayan Times (English)                       | Authorities provide face masks to locals                                            |
| 2020-04-07                       | Kantipur (Nepali)                               | देउवाद्वारा राष्ट्रिय सहमतिको आह्वान                                                |
| 2020-04-16                       | Himalayan Times (English)                       | BAC agrees to provide fund to fight against virus                                   |
| 2020-03-06                       | Himalayan Times (English)                       | Bagmati govt urges people not to shake hands                                        |
| 2020-08-24                       | Himalayan Times (English)                       | Bagmati Province to set up PCR labs in three more hospitals as virus cases increase |
| 2020-06-19                       | Himalayan Times (English)                       | Bajura ANM exudes sense of service in the time of COVID crisis                      |
| 2020-04-15                       | Himalayan Times (English)                       | Bajura lacks essential medical equipment                                            |
| 2020-05-30                       | Himalayan Times (English)                       | Bajura quarantine facilities in a shambles, sans health workers                     |
| 2020-05-01                       | Himalayan Times (English)                       | Bajura quarantine gets sub-standard rice                                            |
| 2020-06-04                       | Himalayan Times (English)                       | Bandipur RM sealed                                                                  |
| 2020-08-10                       | Himalayan Times (English)                       | Bank sealed after employees contract virus                                          |
| 2020-03-24                       | Himalayan Times (English)                       | Banke residents in home quarantine                                                  |
| 2020-05-18                       | Himalayan Times (English)                       | Banke youth succumbs to novel coronavirus disease                                   |
| 2020-06-30                       | Himalayan Times (English)                       | Banks mull slashing interest rate on deposits from new fiscal year, Page 5          |
| 2020-07-21                       | Himalayan Times (English)                       | Bara DAO issues prohibitory order as virus cases increase                           |

| <b>Date of publication (yyyy/mm/dd)</b> | <b>Name of news media (select from drop-down menu)</b> | <b>Title of news/headline</b>                                                                 |
|-----------------------------------------|--------------------------------------------------------|-----------------------------------------------------------------------------------------------|
| 2020-04-10                              | Himalayan Times (English)                              | Bara families get rotten rice in the name of relief                                           |
| 2020-06-14                              | Himalayan Times (English)                              | Bara locals panic after COVID-19 confirmed as cause of five-year-old boy's death              |
| 2020-08-11                              | Himalayan Times (English)                              | Bara to set up 400-bed isolation ward                                                         |
| 2020-03-06                              | Online Khabar (Nepali)                                 | Bhaktapur festival postponed due to corona                                                    |
| 2020-02-06                              | Himalayan Times (English)                              | Bhaktapur locals protest against likely quarantine site                                       |
| 2020-02-01                              | Online Khabar (Nepali)                                 | Bharatpur Hospital has set up an isolation ward to treat those infected with the corona virus |
| 2020-07-10                              | Himalayan Times (English)                              | Bharatpur Hospital providing dialysis service to COVID patients                               |
| 2020-03-16                              | Himalayan Times (English)                              | Bheri Hospital ill-prepared to tackle possible coronavirus outbreak                           |
| 2020-05-10                              | Himalayan Times (English)                              | Bheri Municipality provides relief materials to needy                                         |
| 2020-08-26                              | Himalayan Times (English)                              | Bhojpur entry points sealed for 15 days                                                       |
| 2020-06-23                              | Himalayan Times (English)                              | Bhojpur lawmaker in quarantine facility                                                       |
| 2020-03-27                              | Himalayan Times (English)                              | Bir Hospital launches phone consultation service                                              |
| 2020-04-11                              | Himalayan Times (English)                              | Bir hospital starts COVID-19 tests                                                            |
| 2020-07-27                              | Himalayan Times (English)                              | Biratnagar shuts services other than essential ones                                           |
| 2020-02-09                              | Online Khabar (Nepali)                                 | Black market of mask in the name of Corona                                                    |
| 2020-04-13                              | Kantipur (Nepali)                                      | दक्षिणी सीमा 'सिल' गर्न सुझाव                                                                 |
| 2020-01-20                              | Himalayan Times (English)                              | Blood, throat swab sent to HK for diagnosis                                                   |
| 2020-04-16                              | Himalayan Times (English)                              | Border points closed                                                                          |
| 2020-04-21                              | Himalayan Times (English)                              | Border points closed in Khotang                                                               |
| 2020-04-06                              | Himalayan Times (English)                              | Borders closed                                                                                |
| 2020-08-09                              | Himalayan Times (English)                              | BPKIHS faces challenge managing COVID-19 cases                                                |
| 2020-06-16                              | Himalayan Times (English)                              | Bread winners return home, kin living on loan                                                 |
| 2020-06-19                              | Himalayan Times (English)                              | Budget for improvement of quarantine facilities                                               |
| 2020-08-26                              | Himalayan Times (English)                              | Budhanilkantha Municipality to set up 50-bed isolation facility                               |
| 2020-05-31                              | Himalayan Times (English)                              | Budhiganga Municipality to insure staffers, health workers                                    |

| Date of publication (yyyy/mm/dd) | Name of news media (select from drop-down menu) | Title of news/headline                                                          |
|----------------------------------|-------------------------------------------------|---------------------------------------------------------------------------------|
| 2020-07-30                       | Himalayan Times (English)                       | Budhinanda Municipality charging Rs 1,400 for RDT                               |
| 2020-07-02                       | Himalayan Times (English)                       | Business activities closed in Khotang                                           |
| 2020-03-24                       | Himalayan Times (English)                       | Businesses closed                                                               |
| 2020-06-25                       | Himalayan Times (English)                       | Businesses start paying taxes though not obliged to                             |
| 2020-06-03                       | Himalayan Times (English)                       | Businesses, general public told to clear tax dues by June 7                     |
| 2020-03-15                       | Online Khabar (Nepali)                          | Businessmen of Rupendehi ready to make quarantine in their hotel                |
| 2020-06-29                       | Online Khabar (Nepali)                          | But feel hungry!                                                                |
| 2020-03-07                       | Himalayan Times (English)                       | Call for House panel to monitor preparedness to fight the virus                 |
| 2020-05-18                       | Himalayan Times (English)                       | Call to test surgery patients, pregnant women                                   |
| 2020-06-18                       | Himalayan Times (English)                       | Can COVID-19 cause long-term effects?                                           |
| 2020-08-11                       | Himalayan Times (English)                       | Capital areas sealed after COVID cases rise                                     |
| 2020-07-14                       | Himalayan Times (English)                       | Capital budget spending at two-decade low of 40 per cent                        |
| 2020-08-21                       | Himalayan Times (English)                       | Capital city to get 5,000-bed isolation centre                                  |
| 2020-05-24                       | Himalayan Times (English)                       | Cardiology, cath lab services halted in MCVTC                                   |
| 2020-06-18                       | Himalayan Times (English)                       | Cases surge past 7,000 after unprecedented intraday spike                       |
| 2020-02-19                       | Online Khabar (Nepali)                          | CDOs, ministers, students and parents are feeling relief at the quarantine site |
| 2020-04-16                       | Kantipur (Nepali)                               | आरडीटी पोजिटिभ भएकाको कन्ट्याक्ट ट्रेसिङ हुनुपर्छ                               |
| 2020-04-18                       | Kantipur (Nepali)                               | आरडीटी पोजिटिभको र बाब संकलनमै ३ दिन                                            |
| 2020-04-14                       | Kantipur (Nepali)                               | आरडीटीबाट यसरी गरिन्छ परीक्षण                                                   |
| 2020-04-22                       | Kantipur (Nepali)                               | आरडीटीमा नेगेटिभ, पीसीआरमा पोजिटिभ                                              |
| 2020-04-16                       | Kantipur (Nepali)                               | आरडीटीमा पोजिटिभ, स्वाब परीक्षणमा नेगेटिभ                                       |
| 2020-04-12                       | Kantipur (Nepali)                               | आरडीटीकै भरमा घर                                                                |
| 2020-04-13                       | Kantipur (Nepali)                               | ओम्नीबाट टेन्डरबाहेकको किट खरिद                                                 |
| 2020-04-11                       | Kantipur (Nepali)                               | ओली-मोदी टेलिफोन वाता                                                           |
| 2020-04-17                       | Kantipur (Nepali)                               | आपत्तमा सघाउँदै आविष्कार                                                        |
| 2020-04-06                       | Kantipur (Nepali)                               | आइसोलेसनबाट भागेका पक्राउ                                                       |
| 2020-05-17                       | Himalayan Times (English)                       | Chandragiri Municipality sealed after five confirmed COVID-19 cases             |
| 2020-06-15                       | Himalayan Times (English)                       | Chief Minister Gurung inspects COVID laboratory in Pokhara                      |
| 2020-02-02                       | Himalayan Times (English)                       | China assures it is taking proactive measures                                   |

| <b>Date of publication (yyyy/mm/dd)</b> | <b>Name of news media (select from drop-down menu)</b> | <b>Title of news/headline</b>                                                      |
|-----------------------------------------|--------------------------------------------------------|------------------------------------------------------------------------------------|
| 2020-06-01                              | Himalayan Times (English)                              | China cities aid Pokhara metropolis                                                |
| 2020-02-18                              | Himalayan Times (English)                              | China evacuees show no symptom of COVID-19                                         |
| 2020-06-17                              | Himalayan Times (English)                              | China provides health materials worth millions                                     |
| 2020-07-23                              | Himalayan Times (English)                              | Chinese national dies of COVID in Nepal                                            |
| 2020-03-11                              | Himalayan Times (English)                              | Chinese quarantined                                                                |
| 2020-03-17                              | Himalayan Times (English)                              | Chitwan DAO devising plan to fight COVID-19                                        |
| 2020-07-02                              | Himalayan Times (English)                              | Chitwan hotels turn into quarantine facilities                                     |
| 2020-05-20                              | Himalayan Times (English)                              | Chitwan to set up quarantine centres in all wards                                  |
| 2020-04-09                              | Kantipur (Nepali)                                      | अपरसन थिएटर मा विरामीले खोकेपछि...                                                 |
| 2020-06-14                              | Himalayan Times (English)                              | CM Employment Programme benefits poor in Jumla district                            |
| 2020-06-02                              | Himalayan Times (English)                              | CNI seeks collective effort to fight crisis                                        |
| 2020-04-18                              | Kantipur (Nepali)                                      | अलपत्र परकालाई राहत दिन निर्देशन                                                   |
| 2020-04-18                              | Kantipur (Nepali)                                      | अलपत्रलाई घर पुऱ्याउनु : सर्वोच्च तर प्रधानमन्त्री भन्छन्- जो जहा छन् त्यहीं रोक्न |
| 2020-03-14                              | Himalayan Times (English)                              | Committee formed to prevent virus spread                                           |
| 2020-08-18                              | Himalayan Times (English)                              | Community spread                                                                   |
| 2020-08-07                              | Himalayan Times (English)                              | Community spread feared in Siraha                                                  |
| 2020-08-15                              | Himalayan Times (English)                              | Community spread of COVID-19 feared in Damak Municipality                          |
| 2020-04-03                              | Himalayan Times (English)                              | Concern raised over Nepalis stranded on border                                     |
| 2020-01-26                              | Online Khabar (Nepali)                                 | Congress demands protection from corona virus                                      |
| 2020-01-31                              | Online Khabar (Nepali)                                 | Congress demands rescue of Nepalis from Wuhan affected by corona virus             |
| 2020-06-04                              | Himalayan Times (English)                              | Conquering COVID-19 strategic plan released                                        |
| 2020-06-01                              | Himalayan Times (English)                              | Contact tracing of six passengers begins in Gandaki                                |
| 2020-07-07                              | Himalayan Times (English)                              | Contagion confirmed in seven NAC staffers                                          |
| 2020-06-16                              | Himalayan Times (English)                              | Coordination panel formed                                                          |
| 2020-06-28                              | Himalayan Times (English)                              | Cop tests positive for coronavirus                                                 |

| <b>Date of publication (yyyy/mm/dd)</b> | <b>Name of news media (select from drop-down menu)</b> | <b>Title of news/headline</b>                                            |
|-----------------------------------------|--------------------------------------------------------|--------------------------------------------------------------------------|
| 2020-03-28                              | Himalayan Times (English)                              | Co-passengers of COVID patient who boarded Air Arabia being tracked down |
| 2020-01-25                              | Kantipur (Nepali)                                      | Corona Virus: Becareful but not Terrified                                |
| 2020-06-25                              | Online Khabar (Nepali)                                 | Corona infection confirmed in Dailekh youth who committed suicide        |
| 2020-05-31                              | Himalayan Times (English)                              | Corona patients forced to spend night outside hospital                   |
| 2020-01-24                              | Online Khabar (Nepali)                                 | Corona virus infection was also found in Nepal                           |
| 2020-01-28                              | Online Khabar (Nepali)                                 | Corona virus: Nepal needs to be alert!                                   |
| 2020-01-23                              | Online Khabar (Nepali)                                 | Corona virus: There is no substitute for caution                         |
| 2020-01-26                              | Online Khabar (Nepali)                                 | Corona Virus: What are being done to prevent infection in Nepal?         |
| 2020-06-25                              | Himalayan Times (English)                              | Coronavirus cases continue to surge as 629 infected in a day             |
| 2020-06-10                              | Himalayan Times (English)                              | Coronavirus cases cross 4,000 in Nepal                                   |
| 2020-06-13                              | Himalayan Times (English)                              | Coronavirus cases surge past 5,000                                       |
| 2020-06-20                              | Himalayan Times (English)                              | Coronavirus cases surge past 8,000                                       |
| 2020-08-29                              | Himalayan Times (English)                              | Coronavirus claims 12 more lives                                         |
| 2020-08-13                              | Himalayan Times (English)                              | Coronavirus claims eight lives in a day                                  |
| 2020-06-24                              | Himalayan Times (English)                              | Coronavirus claims fifth life in Karnali                                 |
| 2020-07-05                              | Himalayan Times (English)                              | Coronavirus detected in valley's drainage water                          |
| 2020-07-04                              | Himalayan Times (English)                              | Coronavirus fatality in Kathmandu                                        |
| 2020-01-26                              | Himalayan Times (English)                              | Coronavirus fear grips tourism sector                                    |
| 2020-01-25                              | Himalayan Times (English)                              | Coronavirus has no boundaries, says Health Minister Dhakal               |
| 2020-02-03                              | Himalayan Times (English)                              | Coronavirus hits Nepal-China trade                                       |
| 2020-03-12                              | Himalayan Times (English)                              | Coronavirus impacts Sauraha hoteliers                                    |
| 2020-08-11                              | Himalayan Times (English)                              | Coronavirus in APF personnel increases risk of community spread in Jhapa |
| 2020-06-23                              | Himalayan Times (English)                              | Coronavirus infected persons moving freely in Bajura                     |
| 2020-03-14                              | Himalayan Times (English)                              | Coronavirus infection threat spreads panic                               |
| 2020-06-08                              | Himalayan Times (English)                              | Coronavirus infects 213 more, Nepal count 3,448                          |
| 2020-06-06                              | Himalayan Times (English)                              | Coronavirus insurance policy gets continuity                             |



| <b>Date of publication<br/>(yyyy/mm/dd)</b> | <b>Name of news media<br/>(select from drop-down menu)</b> | <b>Title of news/headline</b>                                            |
|---------------------------------------------|------------------------------------------------------------|--------------------------------------------------------------------------|
| 2020-08-06                                  | Himalayan Times<br>(English)                               | Coronavirus Insurance Programme formally launched                        |
| 2020-05-14                                  | Himalayan Times<br>(English)                               | Coronavirus patient discharged from hospital after recovery              |
| 2020-03-08                                  | Himalayan Times<br>(English)                               | Coronavirus screening starts at Simara Airport                           |
| 2020-07-04                                  | Himalayan Times<br>(English)                               | Coronavirus spreads in community                                         |
| 2020-02-13                                  | Himalayan Times<br>(English)                               | Coronavirus suspect goes missing                                         |
| 2020-01-29                                  | Himalayan Times<br>(English)                               | Coronavirus suspects test negative                                       |
| 2020-04-16                                  | Himalayan Times<br>(English)                               | Coronavirus threat affects immunisation campaign                         |
| 2020-03-03                                  | Himalayan Times<br>(English)                               | Coronavirus wards to be set up                                           |
| 2020-06-22                                  | Himalayan Times<br>(English)                               | Country faces challenges of COVID-19, monsoon related disasters          |
| 2020-06-24                                  | Himalayan Times<br>(English)                               | Country's COVID count crosses 10,000                                     |
| 2020-07-13                                  | Himalayan Times<br>(English)                               | COVID cases 'on a decline', but EDCC suspects community spread in valley |
| 2020-06-19                                  | Himalayan Times<br>(English)                               | Covid cases continue to surge exponentially                              |
| 2020-07-10                                  | Himalayan Times<br>(English)                               | COVID cases decline mysteriously                                         |
| 2020-07-16                                  | Himalayan Times<br>(English)                               | COVID claims 36-year-old                                                 |
| 2020-06-01                                  | Himalayan Times<br>(English)                               | COVID claims life of a two-year-old girl                                 |
| 2020-07-24                                  | Himalayan Times<br>(English)                               | COVID claims one                                                         |
| 2020-06-19                                  | Himalayan Times<br>(English)                               | COVID confirmed in man who killed self                                   |
| 2020-06-29                                  | Himalayan Times<br>(English)                               | COVID crisis: Banks to adopt austerity measures, Page 5                  |
| 2020-05-26                                  | Himalayan Times<br>(English)                               | COVID fatality: Body handover kicks up row                               |
| 2020-08-10                                  | Himalayan Times<br>(English)                               | COVID fear looms large with more people entering Manang                  |
| 2020-08-31                                  | Himalayan Times<br>(English)                               | COVID infected woman dies                                                |
| 2020-08-21                                  | Himalayan Times<br>(English)                               | COVID infection spreads at community level in Jhapa                      |
| 2020-08-10                                  | Himalayan Times<br>(English)                               | COVID patient dies                                                       |

| <b>Date of publication<br/>(yyyy/mm/dd)</b> | <b>Name of news media<br/>(select from drop-down menu)</b> | <b>Title of news/headline</b>                                       |
|---------------------------------------------|------------------------------------------------------------|---------------------------------------------------------------------|
| 2020-08-03                                  | Himalayan Times<br>(English)                               | COVID patient recovers after plasma therapy                         |
| 2020-05-21                                  | Himalayan Times<br>(English)                               | COVID patient stable                                                |
| 2020-06-03                                  | Himalayan Times<br>(English)                               | COVID patients quarantined for want of isolation wards              |
| 2020-06-07                                  | Himalayan Times<br>(English)                               | COVID recovery                                                      |
| 2020-08-12                                  | Himalayan Times<br>(English)                               | COVID scare spoils Krishna Janmashtami festival                     |
| 2020-08-12                                  | Himalayan Times<br>(English)                               | COVID spreads at community level in Rautahat                        |
| 2020-06-24                                  | Himalayan Times<br>(English)                               | COVID test halted at Narayani Hospital for past three days          |
| 2020-04-17                                  | Himalayan Times<br>(English)                               | COVID test: Question mark over efficacy of labs outside capital     |
| 2020-07-03                                  | Himalayan Times<br>(English)                               | COVID tests not expanded in Sudurpaschim                            |
| 2020-07-05                                  | Himalayan Times<br>(English)                               | COVID victim's body laid to rest amid obstruction                   |
| 2020-06-08                                  | Himalayan Times<br>(English)                               | COVID victims cremated before the result came                       |
| 2020-03-14                                  | Himalayan Times<br>(English)                               | COVID-19 call centre                                                |
| 2020-07-20                                  | Himalayan Times<br>(English)                               | COVID-19 cases up in Saptari                                        |
| 2020-05-31                                  | Himalayan Times<br>(English)                               | COVID-19 claims Dailekh youth                                       |
| 2020-06-26                                  | Himalayan Times<br>(English)                               | COVID-19 confirmed in Dailekh suicide case                          |
| 2020-07-14                                  | Himalayan Times<br>(English)                               | COVID-19 control, disaster management top priorities                |
| 2020-06-04                                  | Himalayan Times<br>(English)                               | COVID-19 curve flattening in Narainapur                             |
| 2020-07-06                                  | Himalayan Times<br>(English)                               | COVID-19 death toll of Nepalis abroad climbs to 143                 |
| 2020-07-26                                  | Himalayan Times<br>(English)                               | COVID-19 detected in community                                      |
| 2020-04-24                                  | Himalayan Times<br>(English)                               | COVID-19 fear in army barracks after Bhulke residents test positive |
| 2020-03-08                                  | Himalayan Times<br>(English)                               | COVID-19 fear spurs hoarding of face masks                          |
| 2020-07-18                                  | Himalayan Times<br>(English)                               | COVID-19 hospital gets 40-bed isolation ward                        |
| 2020-04-28                                  | Himalayan Times<br>(English)                               | COVID-19 hospital operational in BPKIHS                             |

| <b>Date of publication (yyyy/mm/dd)</b> | <b>Name of news media (select from drop-down menu)</b> | <b>Title of news/headline</b>                             |
|-----------------------------------------|--------------------------------------------------------|-----------------------------------------------------------|
| 2020-06-30                              | Himalayan Times (English)                              | COVID-19 infected participating in social functions       |
| 2020-08-20                              | Himalayan Times (English)                              | COVID-19 infected woman dies in Dharan                    |
| 2020-08-08                              | Himalayan Times (English)                              | COVID-19 infected youth dies                              |
| 2020-07-17                              | Himalayan Times (English)                              | COVID-19 infected youth's body disposed                   |
| 2020-03-29                              | Himalayan Times (English)                              | COVID-19 patient accuses doctors of denying him treatment |
| 2020-03-29                              | Himalayan Times (English)                              | COVID-19 patient confident he will recover soon           |
| 2020-05-16                              | Himalayan Times (English)                              | COVID-19 patients shifted to corona special hospital      |
| 2020-03-10                              | Himalayan Times (English)                              | Covid-19 scare keeps most revellers indoors               |
| 2020-04-09                              | Himalayan Times (English)                              | COVID-19 sledgehammers economic activities                |
| 2020-08-07                              | Himalayan Times (English)                              | COVID-19 spread in community thru factory in Dharan       |
| 2020-03-16                              | Himalayan Times (English)                              | COVID-19 suspect sent to Kathmandu                        |
| 2020-08-30                              | Himalayan Times (English)                              | COVID-19 tracing easier said than done                    |
| 2020-06-20                              | Himalayan Times (English)                              | COVID-19 victim laid to rest in Banke                     |
| 2020-03-29                              | Himalayan Times (English)                              | COVID-19 website                                          |
| 2020-06-05                              | Himalayan Times (English)                              | COVID-19: The gender conundrum                            |
| 2020-05-25                              | Himalayan Times (English)                              | COVID-infected person flees from hospital                 |
| 2020-06-23                              | Himalayan Times (English)                              | Covira app launched to measure COVID risk                 |
| 2020-04-18                              | Himalayan Times (English)                              | Crisis management centre to be set up                     |
| 2020-06-26                              | Himalayan Times (English)                              | Crores mobilised to combat COVID                          |
| 2020-04-10                              | Kantipur (Nepali)                                      | अग्रपंक्तिका र स्वास्थ्यकर्मी र प्रहरीकै तलब कट्टा        |
| 2020-06-26                              | Online Khabar (Nepali)                                 | Cyber crime has increased in the lockdown                 |
| 2020-04-06                              | Kantipur (Nepali)                                      | मूल सडकमा कडाइ, भित्र भीडभाड                              |
| 2020-04-08                              | Kantipur (Nepali)                                      | मेसिनले नधान्दा काठमाडौं पठाइयो स्वाब                     |
| 2020-06-08                              | Himalayan Times (English)                              | Dailekh becoming COVID hotspot in Karnali                 |
| 2020-03-29                              | Himalayan Times (English)                              | Daily wage earners in Tanahun face starvation             |

| <b>Date of publication (yyyy/mm/dd)</b> | <b>Name of news media (select from drop-down menu)</b> | <b>Title of news/headline</b>                                              |
|-----------------------------------------|--------------------------------------------------------|----------------------------------------------------------------------------|
| 2020-03-27                              | Himalayan Times (English)                              | Daily wagers bear the brunt of lockdown, govt fails to provide reprieve    |
| 2020-06-15                              | Himalayan Times (English)                              | DAO puts more restrictions on entry into valley                            |
| 2020-05-16                              | Himalayan Times (English)                              | DAO seals Katuwalpauwa amid virus scare                                    |
| 2020-08-08                              | Himalayan Times (English)                              | DAOs agree on 16-day restrictions in valley                                |
| 2020-03-06                              | Himalayan Times (English)                              | DAOs urge people to avoid gatherings                                       |
| 2020-02-04                              | Himalayan Times (English)                              | DDA warns black marketeers                                                 |
| 2020-06-25                              | Himalayan Times (English)                              | Dealing with summer heat amid COVID-19 pandemic                            |
| 2020-07-31                              | Himalayan Times (English)                              | Death in quarantine                                                        |
| 2020-06-01                              | Himalayan Times (English)                              | Death toll of Nepalis abroad rises to 121                                  |
| 2020-05-01                              | Kantipur (Nepali)                                      | Debate in Management of Corona Hospital                                    |
| 2020-06-04                              | Himalayan Times (English)                              | Decision protested                                                         |
| 2020-07-15                              | Himalayan Times (English)                              | Decision to ramp up tests in Sudurpaschim yet to be implemented            |
| 2020-05-19                              | Himalayan Times (English)                              | Decision to turn Kalaiya Hospital into COVID treatment facility draws flak |
| 2020-07-01                              | Kantipur (Nepali)                                      | Demand For Introducing Relief Program                                      |
| 2020-05-05                              | Himalayan Times (English)                              | Dengue cases up in Gandaki Province                                        |
| 2020-05-27                              | Himalayan Times (English)                              | Deuba renews demand for relief package to journos and media houses         |
| 2020-03-28                              | Himalayan Times (English)                              | Deuba urges govt to act                                                    |
| 2020-04-19                              | Kantipur (Nepali)                                      | मोहनापारि दशगजाभिन्नै सिल                                                  |
| 2020-08-13                              | Himalayan Times (English)                              | Dhading DAO issues prohibitory order                                       |
| 2020-03-17                              | Himalayan Times (English)                              | Dhangadi sub-metropolis conducting health check-up at border point         |
| 2020-08-07                              | Himalayan Times (English)                              | Dhangadi sub-metropolis sets up isolation ward                             |
| 2020-08-12                              | Himalayan Times (English)                              | Dharan sub-metropolis sets up isolation ward                               |
| 2020-08-03                              | Himalayan Times (English)                              | Dharan to conduct mass PCR tests                                           |
| 2020-03-22                              | Himalayan Times (English)                              | Dial 1180 in case of COVID-19 suspicion: KMC                               |
| 2020-04-22                              | Himalayan Times (English)                              | DIGs told to strictly enforce lockdown                                     |

| Date of publication (yyyy/mm/dd) | Name of news media (select from drop-down menu) | Title of news/headline                                                            |
|----------------------------------|-------------------------------------------------|-----------------------------------------------------------------------------------|
| 2020-01-23                       | Himalayan Times (English)                       | Dire straits                                                                      |
| 2020-06-13                       | Himalayan Times (English)                       | Directive on RDT creates panic in Sudurpaschim                                    |
| 2020-01-30                       | Online Khabar (Nepali)                          | Discussions are underway to rescue Nepali students from China: Ministry of Health |
| 2020-05-05                       | Himalayan Times (English)                       | Disinfectant tunnel                                                               |
| 2020-04-30                       | Himalayan Times (English)                       | Disinfection tunnel to be inaugurated today                                       |
| 2020-06-25                       | Online Khabar (Nepali)                          | Disruption in management of corpses in Pokhara again                              |
| 2020-02-02                       | Himalayan Times (English)                       | Disseminate information on coronavirus in tourist areas: Stakeholders             |
| 2020-03-31                       | Himalayan Times (English)                       | Distance maintained                                                               |
| 2020-08-25                       | Himalayan Times (English)                       | Docs advocate plasma therapy for critically ill COVID patients                    |
| 2020-03-24                       | Himalayan Times (English)                       | Docs favour treatment only in designated hospitals                                |
| 2020-03-21                       | Himalayan Times (English)                       | Docs seek more protective equipment                                               |
| 2020-03-07                       | Himalayan Times (English)                       | Doctors at BPKIHS accused of ditching patient amidst coronavirus scare            |
| 2020-07-03                       | Himalayan Times (English)                       | DoFE starts issuing re-entry permits                                              |
| 2020-06-16                       | Himalayan Times (English)                       | Don't be careless, keep following safety measures                                 |
| 2020-03-13                       | Himalayan Times (English)                       | Drastic steps planned to prevent outbreak                                         |
| 2020-06-24                       | Himalayan Times (English)                       | Drive to end stigma, discrimination against coronavirus patients launched         |
| 2020-03-20                       | Himalayan Times (English)                       | DRRMA dwells on preparedness, response plan for COVID-19                          |
| 2020-06-08                       | Himalayan Times (English)                       | Duty comes first for these Koshi lab heroes                                       |
| 2020-07-26                       | Himalayan Times (English)                       | Ease restrictions on domestic flights: Airline operators                          |
| 2020-06-21                       | Himalayan Times (English)                       | E-conference on COVID-19 held in Karnali Province                                 |
| 2020-01-20                       | Himalayan Times (English)                       | EDCD to display banners in Mandarin                                               |
| 2020-03-27                       | Kantipur (Nepali)                               | भारतबाट आएकालाई क्वारन्टाइनमा रोख्नु                                              |
| 2020-04-20                       | Kantipur (Nepali)                               | भोकै परका ५ सय मजदुरले मागे राहत                                                  |
| 2020-04-25                       | Himalayan Times (English)                       | Efficacy of rapid corona tests questioned as 16 test positive after negative RDT  |
| 2020-05-05                       | Himalayan Times (English)                       | Eight injured in dispute over relief distribution                                 |

| <b>Date of publication (yyyy/mm/dd)</b> | <b>Name of news media (select from drop-down menu)</b> | <b>Title of news/headline</b>                                                 |
|-----------------------------------------|--------------------------------------------------------|-------------------------------------------------------------------------------|
| 2020-08-28                              | Himalayan Times (English)                              | Eight more die                                                                |
| 2020-03-27                              | Himalayan Times (English)                              | Eight suspected COVID-19 patients in isolation wards                          |
| 2020-08-04                              | Himalayan Times (English)                              | Elderly COVID patient dies                                                    |
| 2020-06-09                              | Himalayan Times (English)                              | Elderly man succumbs to virus                                                 |
| 2020-08-05                              | Himalayan Times (English)                              | Elderly succumbs to contagion                                                 |
| 2020-08-27                              | Himalayan Times (English)                              | Eleven more succumb to coronavirus                                            |
| 2020-06-11                              | Himalayan Times (English)                              | Emergency ward of province hospital closed                                    |
| 2020-06-12                              | Himalayan Times (English)                              | Enough is enough! How it all started and where is it headed                   |
| 2020-03-07                              | Himalayan Times (English)                              | Enough stock of essentials: Govt                                              |
| 2020-06-17                              | Himalayan Times (English)                              | Ensuring safety and livelihood of waste workers                               |
| 2020-03-05                              | Online Khabar (Nepali)                                 | Entering Nepal saying 'Delhi riots bigger than Corona'!                       |
| 2020-06-04                              | Himalayan Times (English)                              | Entry points closed                                                           |
| 2020-05-08                              | Himalayan Times (English)                              | Entry points sealed                                                           |
| 2020-04-10                              | Kantipur (Nepali)                                      | भएकै प्रयोगशाला उपयोग गरिएन                                                   |
| 2020-07-01                              | Kantipur (Nepali)                                      | Equipment were halted in China But Nepal keeps Purchasing Them in the Country |
| 2020-07-03                              | Himalayan Times (English)                              | EU, UNICEF to prevent malnutrition in Nepal                                   |
| 2020-02-05                              | Himalayan Times (English)                              | Evacuees could be quarantined in Bhaktapur                                    |
| 2020-02-29                              | Himalayan Times (English)                              | Evacuees to return home on 17th day                                           |
| 2020-05-01                              | Kantipur (Nepali)                                      | Exams after Three Weeks of Lockdown End                                       |
| 2020-08-24                              | Himalayan Times (English)                              | Expand PCR tests across country: Deuba                                        |
| 2020-05-01                              | Himalayan Times (English)                              | Expecting mother expelled from operation theatre                              |
| 2020-01-29                              | Himalayan Times (English)                              | Face masks rerouted to China, shortage hits market                            |
| 2020-03-17                              | Himalayan Times (English)                              | Face masks, sanitisers crunch in Nepalgunj                                    |
| 2020-07-03                              | Himalayan Times (English)                              | Family of deceased in dire straits                                            |
| 2020-04-18                              | Himalayan Times (English)                              | Federal govt starts sending doctors to provinces, 34 docs reach Dhangadi      |

| <b>Date of publication<br/>(yyyy/mm/dd)</b> | <b>Name of news media<br/>(select from drop-down menu)</b> | <b>Title of news/headline</b>                                    |
|---------------------------------------------|------------------------------------------------------------|------------------------------------------------------------------|
| 2020-03-29                                  | Himalayan Times<br>(English)                               | Fifth COVID-19 case confirmed in teenager from Baglung           |
| 2020-06-02                                  | Himalayan Times<br>(English)                               | FinMin Khatiwada defends budget for FY 2020-21                   |
| 2020-06-10                                  | Himalayan Times<br>(English)                               | First COVID death in Chitwan                                     |
| 2020-05-17                                  | Himalayan Times<br>(English)                               | First COVID-19 death in Nepal                                    |
| 2020-04-05                                  | Himalayan Times<br>(English)                               | First local transmission of COVID-19                             |
| 2020-05-11                                  | Himalayan Times<br>(English)                               | Fiscal budget to prioritise revitalising crisis-hit economy      |
| 2020-08-07                                  | Himalayan Times<br>(English)                               | Five deaths in a day                                             |
| 2020-03-07                                  | Himalayan Times<br>(English)                               | Five hospitalised for COVID-19                                   |
| 2020-06-08                                  | Himalayan Times<br>(English)                               | Five infected persons isolated in Dadeldhura                     |
| 2020-04-21                                  | Himalayan Times<br>(English)                               | Five involved in distribution of relief held                     |
| 2020-08-18                                  | Himalayan Times<br>(English)                               | Five local levels sealed in Tanahun                              |
| 2020-08-08                                  | Himalayan Times<br>(English)                               | Five more fatalities                                             |
| 2020-05-06                                  | Himalayan Times<br>(English)                               | Five quarantined                                                 |
| 2020-04-08                                  | Himalayan Times<br>(English)                               | Flight suspension extended till April 30                         |
| 2020-05-21                                  | Himalayan Times<br>(English)                               | Flights to remain suspended till June 14                         |
| 2020-08-11                                  | Himalayan Times<br>(English)                               | Flights to remain suspended till September 1                     |
| 2020-06-01                                  | Himalayan Times<br>(English)                               | FNCCI calls for lockdown extension review                        |
| 2020-04-26                                  | Himalayan Times<br>(English)                               | Food distributed                                                 |
| 2020-06-19                                  | Himalayan Times<br>(English)                               | Food insecurity increases by 23 per cent in Nepal                |
| 2020-04-02                                  | Himalayan Times<br>(English)                               | Foreign returnees facing humiliation                             |
| 2020-06-14                                  | Himalayan Times<br>(English)                               | Foreign returnees to be quarantined in Dhulikhel                 |
| 2020-03-20                                  | Himalayan Times<br>(English)                               | Foreigners not complying with mandatory self-quarantine measures |
| 2020-05-02                                  | Himalayan Times<br>(English)                               | Four areas sealed in Nepalgunj                                   |

| <b>Date of publication<br/>(yyyy/mm/dd)</b> | <b>Name of news media<br/>(select from drop-down menu)</b> | <b>Title of news/headline</b>                                                                 |
|---------------------------------------------|------------------------------------------------------------|-----------------------------------------------------------------------------------------------|
| 2020-06-03                                  | Himalayan Times<br>(English)                               | Four health workers test positive in valley, 288 COVID cases in a day, Nepal count tops 2,000 |
| 2020-08-15                                  | Himalayan Times<br>(English)                               | Four more deaths                                                                              |
| 2020-08-11                                  | Himalayan Times<br>(English)                               | Four more succumb to contagion                                                                |
| 2020-08-12                                  | Himalayan Times<br>(English)                               | Four more succumb to COVID-19                                                                 |
| 2020-08-14                                  | Himalayan Times<br>(English)                               | Four new coronavirus fatalities                                                               |
| 2020-08-27                                  | Himalayan Times<br>(English)                               | Four succumb to virus in 24 hours in Birgunj                                                  |
| 2020-03-02                                  | Himalayan Times<br>(English)                               | Four suspected COVID-19 patients in hospital                                                  |
| 2020-07-26                                  | Himalayan Times<br>(English)                               | Fourteen health workers quarantined in Rajbiraj                                               |
| 2020-07-01                                  | Himalayan Times<br>(English)                               | Fourteen new COVID patients diagnosed in Kathmandu valley                                     |
| 2020-07-20                                  | Himalayan Times<br>(English)                               | Free COVID-19 test for cancer, heart patients                                                 |
| 2020-06-04                                  | Himalayan Times<br>(English)                               | Frontline workers to get hazard allowance                                                     |
| 2020-04-09                                  | Himalayan Times<br>(English)                               | Funeral workers demand PPE                                                                    |
| 2020-04-12                                  | Kantipur (Nepali)                                          | नेपाल छिर्न अनेक जुक्ति                                                                       |
| 2020-04-19                                  | Kantipur (Nepali)                                          | नेपाली अर्थतन्त्रले कति गुमाउला                                                               |
| 2020-08-05                                  | Himalayan Times<br>(English)                               | Gai Jatra celebrated amid COVID pandemic                                                      |
| 2020-07-02                                  | Himalayan Times<br>(English)                               | Gandaki COVID cases near one thousand                                                         |
| 2020-07-03                                  | Himalayan Times<br>(English)                               | Gandaki PA panel president donates perks to corona fund                                       |
| 2020-06-11                                  | Himalayan Times<br>(English)                               | Gandaki Province collecting details at entry point                                            |
| 2020-06-14                                  | Himalayan Times<br>(English)                               | Gandaki province local levels to procure PCR machines                                         |
| 2020-03-24                                  | Himalayan Times<br>(English)                               | Gandaki Province shuts vehicular movement                                                     |
| 2020-04-06                                  | Kantipur (Nepali)                                          | नारायणीमा २० आइसोलेसन शय्या थप                                                                |
| 2020-04-06                                  | Himalayan Times<br>(English)                               | Give priority to needy people in relief distribution: MoFAGA                                  |
| 2020-03-25                                  | Himalayan Times<br>(English)                               | Gokarneshwor Municipality to set up 27-bed centre for coronavirus patients                    |
| 2020-03-18                                  | Himalayan Times<br>(English)                               | Good samaritans willing to turn houses into quarantine facilities                             |
| 2020-04-12                                  | Himalayan Times<br>(English)                               | Government issues COVID-19 fund directive                                                     |



| <b>Date of publication (yyyy/mm/dd)</b> | <b>Name of news media (select from drop-down menu)</b> | <b>Title of news/headline</b>                                             |
|-----------------------------------------|--------------------------------------------------------|---------------------------------------------------------------------------|
| 2020-06-16                              | Himalayan Times (English)                              | Government offices resume service in two shifts                           |
| 2020-06-09                              | Himalayan Times (English)                              | Government response to Covid crisis abysmal: NC                           |
| 2020-08-08                              | Himalayan Times (English)                              | Government rules out complete lockdown                                    |
| 2020-05-09                              | Himalayan Times (English)                              | Government set to begin pool testing to trace novel coronavirus infection |
| 2020-03-12                              | Himalayan Times (English)                              | Government still not prepared to fight coronavirus outbreak               |
| 2020-03-19                              | Himalayan Times (English)                              | Government takes drastic steps to counter novel coronavirus threat        |
| 2020-02-02                              | Himalayan Times (English)                              | Government to evacuate Nepalis from Hubei                                 |
| 2020-04-26                              | Himalayan Times (English)                              | Government urged to adopt reliable testing method                         |
| 2020-04-04                              | Himalayan Times (English)                              | Government urged to protect migrant workers, marginalised groups          |
| 2020-02-03                              | Himalayan Times (English)                              | Government urged to take precautionary measures against coronavirus       |
| 2020-05-02                              | Himalayan Times (English)                              | Government's stimulus packages inadequate, laments private sector         |
| 2020-04-01                              | Himalayan Times (English)                              | Govt adopts three-pronged approach to fight COVID-19                      |
| 2020-02-13                              | Himalayan Times (English)                              | Govt allays fear of coronavirus in Sindhupalchowk                         |
| 2020-06-15                              | Himalayan Times (English)                              | Govt asked to strengthen law and order                                    |
| 2020-04-01                              | Himalayan Times (English)                              | Govt cancels Visit Nepal 2020 campaign                                    |
| 2020-04-04                              | Himalayan Times (English)                              | Govt decision to outsource PPE procurement contract to NA draws flak      |
| 2020-06-07                              | Himalayan Times (English)                              | Govt directed to ensure regular medical services to citizen               |
| 2020-05-15                              | Himalayan Times (English)                              | Govt does away with issuing vehicle passes                                |
| 2020-03-25                              | Himalayan Times (English)                              | Govt doing its bit to prevent COVID-19 outbreak in prisons                |
| 2020-06-12                              | Himalayan Times (English)                              | Govt eases lockdown                                                       |
| 2020-05-31                              | Himalayan Times (English)                              | Govt extends lockdown till June 14                                        |
| 2020-03-14                              | Himalayan Times (English)                              | Govt fails to deliver right information at right time                     |
| 2020-02-24                              | Himalayan Times (English)                              | Govt halts Nepali workers from going to South Korea                       |

| <b>Date of publication (yyyy/mm/dd)</b> | <b>Name of news media (select from drop-down menu)</b> | <b>Title of news/headline</b>                              |
|-----------------------------------------|--------------------------------------------------------|------------------------------------------------------------|
| 2020-04-11                              | Himalayan Times (English)                              | Govt hospitals in Bara turning patients away               |
| 2020-06-20                              | Himalayan Times (English)                              | Govt issues COVID safety guidelines                        |
| 2020-05-22                              | Himalayan Times (English)                              | Govt issues COVID-19 Unified Hospital Operation Order      |
| 2020-06-06                              | Himalayan Times (English)                              | Govt issues new guidelines for COVID testing               |
| 2020-05-01                              | Himalayan Times (English)                              | Govt launches relief package targeting workers             |
| 2020-06-23                              | Himalayan Times (English)                              | Govt managing ventilators, ICUs by estimating corona cases |
| 2020-06-04                              | Himalayan Times (English)                              | Govt may declare state of public health emergency          |
| 2020-05-02                              | Himalayan Times (English)                              | Govt plans to ease lockdown, restart economy               |
| 2020-05-05                              | Himalayan Times (English)                              | Govt plans to evacuate over 35,000 illegal migrants        |
| 2020-05-27                              | Himalayan Times (English)                              | Govt projects 2.3 per cent economic growth for this fiscal |
| 2020-07-18                              | Himalayan Times (English)                              | Govt rules out COVID community spread in valley            |
| 2020-03-23                              | Himalayan Times (English)                              | Govt seals border, creates Rs 500 million fund             |
| 2020-05-23                              | Himalayan Times (English)                              | Govt still unprepared to bring back Nepalis                |
| 2020-04-05                              | Himalayan Times (English)                              | Govt to conduct rapid testing in three districts           |
| 2020-07-21                              | Himalayan Times (English)                              | Govt to conduct sero-survey of COVID community spread      |
| 2020-06-15                              | Himalayan Times (English)                              | Govt to let pvt labs conduct PCR tests                     |
| 2020-04-06                              | Himalayan Times (English)                              | Govt to mobilise 50,000 health volunteers                  |
| 2020-05-20                              | Himalayan Times (English)                              | Govt to rescue Nepalis stranded abroad 'on priority basis' |
| 2020-03-27                              | Himalayan Times (English)                              | Govt told to ensure smooth supply of daily essentials      |
| 2020-03-03                              | Himalayan Times (English)                              | Govt told to halt flights to high-risk countries           |
| 2020-03-12                              | Himalayan Times (English)                              | Govt urged to act on war footing                           |
| 2020-03-16                              | Himalayan Times (English)                              | Govt urged to declare 'economic emergency'                 |
| 2020-03-19                              | Himalayan Times (English)                              | Govt urged to ensure supply of daily essentials            |

| <b>Date of publication (yyyy/mm/dd)</b> | <b>Name of news media (select from drop-down menu)</b> | <b>Title of news/headline</b>                                                                                                                                       |
|-----------------------------------------|--------------------------------------------------------|---------------------------------------------------------------------------------------------------------------------------------------------------------------------|
| 2020-07-06                              | Himalayan Times (English)                              | Govt urged to guarantee citizens' right to health                                                                                                                   |
| 2020-03-20                              | Himalayan Times (English)                              | Govt's measures to fight COVID-19 inadequate, say MPs                                                                                                               |
| 2020-06-05                              | Himalayan Times (English)                              | GPKTC turned into Corona hospital                                                                                                                                   |
| 2020-04-27                              | Himalayan Times (English)                              | Grant of Rs 30 million                                                                                                                                              |
| 2020-03-25                              | Himalayan Times (English)                              | Grocery stores can operate during week-long shutdown, reiterates govt                                                                                               |
| 2020-03-27                              | Kantipur (Nepali)                                      | नगर जुटे आइसोलेसन कक्षमा                                                                                                                                            |
| 2020-05-22                              | Himalayan Times (English)                              | Gulmi teacher succumbs to coronavirus                                                                                                                               |
| 2020-04-15                              | Kantipur (Nepali)                                      | जसले त्रासका बेला आशा जगाए ७५३ र थानीय तहका जनप्रतिनिधिलाई यतिबे ला धपे डी छ । को भिड-१९ को त्रास भएसगै जनचे तनामूलक कार्यक्रम सुरू गरे का उनीहरुले अहिले आफ्नै बजे |
| 2020-08-10                              | Himalayan Times (English)                              | Handigaon sealed in Kathmandu                                                                                                                                       |
| 2020-01-28                              | Kantipur (Nepali)                                      | Has not Spread From Infected                                                                                                                                        |
| 2020-06-16                              | Himalayan Times (English)                              | Health centre sealed                                                                                                                                                |
| 2020-03-06                              | Himalayan Times (English)                              | Health check at airport in Bhadrapur                                                                                                                                |
| 2020-03-18                              | Himalayan Times (English)                              | Health desk established at Pokhara Lakeside                                                                                                                         |
| 2020-03-16                              | Himalayan Times (English)                              | Health desk on border with Sikkim                                                                                                                                   |
| 2020-02-11                              | Himalayan Times (English)                              | Health desk operated                                                                                                                                                |
| 2020-02-04                              | Himalayan Times (English)                              | Health desk set up                                                                                                                                                  |
| 2020-01-31                              | Himalayan Times (English)                              | Health desk set up at Tatopani checkpoint                                                                                                                           |
| 2020-03-06                              | Himalayan Times (English)                              | Health desk set up at Nepalgunj airport                                                                                                                             |
| 2020-02-01                              | Himalayan Times (English)                              | Health desk set up at Pokhara airport                                                                                                                               |
| 2020-03-05                              | Himalayan Times (English)                              | Health desk set up at Rupaidiha border                                                                                                                              |
| 2020-01-30                              | Himalayan Times (English)                              | Health desks set up for coronavirus test                                                                                                                            |
| 2020-03-11                              | Himalayan Times (English)                              | Health desks to be set up in Mustang                                                                                                                                |
| 2020-04-19                              | Himalayan Times (English)                              | Health experts for more polymerase chain reaction tests                                                                                                             |

| <b>Date of publication (yyyy/mm/dd)</b> | <b>Name of news media (select from drop-down menu)</b> | <b>Title of news/headline</b>                                                                                 |
|-----------------------------------------|--------------------------------------------------------|---------------------------------------------------------------------------------------------------------------|
| 2020-04-13                              | Himalayan Times (English)                              | Health experts in Panchthar start COVID-19 sample tests                                                       |
| 2020-07-02                              | Himalayan Times (English)                              | Health materials distributed among youths                                                                     |
| 2020-06-06                              | Himalayan Times (English)                              | Health ministry pitches for declaring health emergency                                                        |
| 2020-01-20                              | Himalayan Times (English)                              | Health system needs to be restructured                                                                        |
| 2020-01-20                              | Himalayan Times (English)                              | Health system needs to be restructured, Page 5                                                                |
| 2020-03-16                              | Himalayan Times (English)                              | Health workers asked not to stay on leave                                                                     |
| 2020-04-30                              | Himalayan Times (English)                              | Health workers at Koshi Hospital fighting coronavirus undeterred, undaunted'                                  |
| 2020-03-30                              | Himalayan Times (English)                              | Health workers attending COVID-19 patient to undergo test                                                     |
| 2020-03-18                              | Himalayan Times (English)                              | Health workers in Bhojpur district directed not to go on leave                                                |
| 2020-06-16                              | Himalayan Times (English)                              | Help sought for lab                                                                                           |
| 2020-06-04                              | Himalayan Times (English)                              | Hepatitis patient being treated in quarantine facility                                                        |
| 2020-04-04                              | Kantipur (Nepali)                                      | जनताको जीवनलाई सबैभन्दा माथि राख्                                                                             |
| 2020-01-31                              | Online Khabar (Nepali)                                 | High level monitoring committee formed for corona virus prevention                                            |
| 2020-06-13                              | Himalayan Times (English)                              | High-level COVID control panel disbanded                                                                      |
| 2020-04-11                              | Himalayan Times (English)                              | High-level panel formed to monitor rights situation                                                           |
| 2020-06-03                              | Himalayan Times (English)                              | High-level panel to decide on easing lockdown by tomorrow, Page 1                                             |
| 2020-04-04                              | Kantipur (Nepali)                                      | ज्वरोका बिरामी जाँच्नेनन् अस्पताल                                                                             |
| 2020-04-20                              | Kantipur (Nepali)                                      | जटिल बन्दै कन्ट्याक्ट ट्रेसिङ                                                                                 |
| 2020-03-24                              | Kantipur (Nepali)                                      | जति धेरै परीक्षण, उति जोखिम कम                                                                                |
| 2020-05-25                              | Himalayan Times (English)                              | Holding areas set up                                                                                          |
| 2020-07-04                              | Himalayan Times (English)                              | Holding centre in Khotang                                                                                     |
| 2020-07-25                              | Himalayan Times (English)                              | Holding, isolation centre for women established                                                               |
| 2020-03-09                              | Himalayan Times (English)                              | Holi being celebrated amid COVID-19 scare                                                                     |
| 2020-06-04                              | Himalayan Times (English)                              | Home isolation for asymptomatic, mild Covid cases                                                             |
| 2020-06-30                              | Kantipur (Nepali)                                      | Home Ministry is not Supportive to Nepali Army for Briging Health Equipment with Financial Support From China |

| <b>Date of publication (yyyy/mm/dd)</b> | <b>Name of news media (select from drop-down menu)</b> | <b>Title of news/headline</b>                                          |
|-----------------------------------------|--------------------------------------------------------|------------------------------------------------------------------------|
| 2020-05-22                              | Himalayan Times (English)                              | Hospital provides delivery service amid COVID fear                     |
| 2020-06-15                              | Himalayan Times (English)                              | Hospital sealed                                                        |
| 2020-08-08                              | Himalayan Times (English)                              | Hospital shuts down services                                           |
| 2020-02-27                              | Himalayan Times (English)                              | Hospitals ill-equipped to handle COVID-19 patients                     |
| 2020-05-17                              | Himalayan Times (English)                              | Hospitals in Karnali to get medical equipment worth Rs 10mn            |
| 2020-03-08                              | Himalayan Times (English)                              | Hospitals outside Kathmandu ill-equipped to tackle COVID-19            |
| 2020-04-07                              | Himalayan Times (English)                              | Hospitals outside Kathmandu ill-prepared to fight coronavirus outbreak |
| 2020-03-29                              | Himalayan Times (English)                              | Hospitals outside valley lack PPE, infrastructure                      |
| 2020-08-13                              | Himalayan Times (English)                              | Hospitals told to test health workers' swab samples for COVID          |
| 2020-05-14                              | Himalayan Times (English)                              | Hospitals treating COVID face shortage of beds                         |
| 2020-05-02                              | Himalayan Times (English)                              | Hospitals turn away patients with fever                                |
| 2020-03-22                              | Himalayan Times (English)                              | Hospitals waiting for reagent to test COVID-19                         |
| 2020-07-09                              | Himalayan Times (English)                              | Hospitals warned against charging for tests                            |
| 2020-08-23                              | Himalayan Times (English)                              | Hotel quarantine not for profit, but govt trying to haggle: HAN        |
| 2020-06-04                              | Himalayan Times (English)                              | Hotels in five locations selected for quarantine                       |
| 2020-07-27                              | Himalayan Times (English)                              | Hotels in Sauraha ready to welcome guests                              |
| 2020-05-24                              | Himalayan Times (English)                              | Hotels to provide rooms to quarantine healthcare workers               |
| 2020-07-31                              | Himalayan Times (English)                              | Hotels, restaurants start resuming services                            |
| 2020-03-18                              | Himalayan Times (English)                              | Hotline service                                                        |
| 2020-06-23                              | Himalayan Times (English)                              | House panel points out discrepancies in purchase of medical supplies   |
| 2020-08-07                              | Himalayan Times (English)                              | House sealed after coronavirus claims man                              |
| 2020-06-08                              | Himalayan Times (English)                              | How a PCR is done                                                      |
| 2020-05-02                              | Kantipur (Nepali)                                      | How COVID-19 Infection Spreads                                         |
| 2020-06-30                              | Kantipur (Nepali)                                      | How to Move in Post-COVID-19 Era?                                      |

| <b>Date of publication (yyyy/mm/dd)</b> | <b>Name of news media (select from drop-down menu)</b> | <b>Title of news/headline</b>                                                                 |
|-----------------------------------------|--------------------------------------------------------|-----------------------------------------------------------------------------------------------|
| 2020-05-01                              | Himalayan Times (English)                              | Human rights monitoring panel formed in all districts                                         |
| 2020-04-28                              | Himalayan Times (English)                              | Hundreds of Kathmandu returnees stranded at Thankot check post                                |
| 2020-06-12                              | Himalayan Times (English)                              | Hundreds protest against govt's 'incompetence'                                                |
| 2020-06-27                              | Himalayan Times (English)                              | Hunger strike against government inefficiency, Page 2                                         |
| 2020-07-02                              | Himalayan Times (English)                              | Hunger strike by youth activists enters sixth day                                             |
| 2020-04-07                              | Kantipur (Nepali)                                      | जहाँ आफन्तलाई पनि प्रवेश निषेध छ                                                              |
| 2020-04-17                              | Kantipur (Nepali)                                      | जहाको सास्ती सरकारले देख्दैन                                                                  |
| 2020-03-11                              | Online Khabar (Nepali)                                 | If necessary, the government can rescue from any country: Shrestha                            |
| 2020-01-31                              | Online Khabar (Nepali)                                 | If there is a risk of corona, we will bring back Nepali students from China : Minister Dhakal |
| 2020-04-03                              | Himalayan Times (English)                              | Imadol locals protest against Indonesian Islamic leaders sheltering in mosque                 |
| 2020-03-13                              | Online Khabar (Nepali)                                 | In print today: How reliable is the corona test in Nepal?                                     |
| 2020-01-27                              | Kantipur (Nepali)                                      | Increase Attention                                                                            |
| 2020-05-18                              | Himalayan Times (English)                              | India gifts 30,000 PCR testing kits to Nepal                                                  |
| 2020-03-16                              | Himalayan Times (English)                              | India offers \$10 million to fight COVID-19                                                   |
| 2020-04-23                              | Himalayan Times (English)                              | India provides 23 tonnes of medicines to Nepal                                                |
| 2020-06-07                              | Himalayan Times (English)                              | India returnees brought to Panchthar sans PCR tests                                           |
| 2020-04-03                              | Himalayan Times (English)                              | Industries allowed to resume operations with residential workers                              |
| 2020-06-02                              | Himalayan Times (English)                              | Infected, non-infected sharing same toilet in Bajura's isolation ward, Page 2                 |
| 2020-07-10                              | Himalayan Times (English)                              | Infection rate high among returnee migrants                                                   |
| 2020-08-12                              | Himalayan Times (English)                              | Informal, salaried workers hit hard by COVID-19 in Kathmandu valley: Study                    |
| 2020-06-29                              | Online Khabar (Nepali)                                 | Instructions to strictly enforce the loosened lockdown criteria                               |
| 2020-06-14                              | Himalayan Times (English)                              | Insurance firms start paying COVID claims                                                     |
| 2020-06-13                              | Himalayan Times (English)                              | Isolation building                                                                            |
| 2020-08-07                              | Himalayan Times (English)                              | Isolation centre vandalised over food quality                                                 |
| 2020-08-31                              | Himalayan Times (English)                              | Isolation facility set up in Dhankuta Municipality                                            |
| 2020-03-19                              | Himalayan Times (English)                              | Isolation ward being set up in Lamjung hospital                                               |

| Date of publication (yyyy/mm/dd) | Name of news media (select from drop-down menu) | Title of news/headline                                                         |
|----------------------------------|-------------------------------------------------|--------------------------------------------------------------------------------|
| 2020-06-26                       | Himalayan Times (English)                       | Isolation ward established in Dhangadi                                         |
| 2020-04-08                       | Himalayan Times (English)                       | Isolation ward in Bajura without docs, equipment                               |
| 2020-08-10                       | Himalayan Times (English)                       | Isolation ward set up                                                          |
| 2020-07-08                       | Himalayan Times (English)                       | Isolation wards empty as COVID-19 cases stay put in quarantine                 |
| 2020-06-28                       | Himalayan Times (English)                       | Isolation wards packed                                                         |
| 2020-03-15                       | Himalayan Times (English)                       | Isolation wards set up in Ramechhap district                                   |
| 2020-07-30                       | Himalayan Times (English)                       | Israel gifts medical supplies to Province 2                                    |
| 2020-02-03                       | Online Khabar (Nepali)                          | It takes at least 2 days to bring back Nepali from China: MoHP                 |
| 2020-06-22                       | Himalayan Times (English)                       | It's okay to be worried, but don't be too worried                              |
| 2020-03-24                       | Kantipur (Nepali)                               | वृद्धवृद्धालाई घरभित्रै राख्नुस्                                               |
| 2020-03-28                       | Himalayan Times (English)                       | Janakpur Provincial Hospital declines to treat woman suffering from high fever |
| 2020-07-16                       | Himalayan Times (English)                       | Jhapa at high risk of COVID-19 spread                                          |
| 2020-06-28                       | Online Khabar (Nepali)                          | Just spoke but PCR machine did not reach Doti                                  |
| 2020-04-09                       | Kantipur (Nepali)                               | परीक्षण सातै प्रदेशमा तर सुरु त                                                |
| 2020-04-15                       | Kantipur (Nepali)                               | परीक्षणबिनाै क्वारेन्टाइनबाट घर                                                |
| 2020-03-26                       | Kantipur (Nepali)                               | प्रदेशहरूमा क्वारेन्टाइन र आइसोलेसनको तयारी                                    |
| 2020-04-20                       | Himalayan Times (English)                       | Kailali COVID patient recovers, discharged                                     |
| 2020-04-22                       | Himalayan Times (English)                       | Kailali youth recovers, discharged                                             |
| 2020-03-23                       | Himalayan Times (English)                       | Kanchanpur, Nepalgunj under indefinite lockdown                                |
| 2020-05-12                       | Himalayan Times (English)                       | Kapilvastu sealed for a week                                                   |
| 2020-05-05                       | Himalayan Times (English)                       | Karnali Province to be sealed for a week                                       |
| 2020-03-08                       | Himalayan Times (English)                       | Karnali to take precautions against virus infection                            |
| 2020-08-24                       | Himalayan Times (English)                       | Kaski NC for continuing prohibitory order                                      |
| 2020-05-01                       | Kantipur (Nepali)                               | Kathmandu is Becoming Insecure                                                 |
| 2020-04-03                       | Himalayan Times (English)                       | Kathmandu patients still to recover                                            |
| 2020-06-17                       | Himalayan Times (English)                       | Kathmandu among 380 fresh COVID cases                                          |
| 2020-08-27                       | Himalayan Times (English)                       | Kavre local levels reluctant to set up isolation wards                         |

| <b>Date of publication (yyyy/mm/dd)</b> | <b>Name of news media (select from drop-down menu)</b> | <b>Title of news/headline</b>                                        |
|-----------------------------------------|--------------------------------------------------------|----------------------------------------------------------------------|
| 2020-05-23                              | Himalayan Times (English)                              | Kavre quarantines almost vacant                                      |
| 2020-08-14                              | Himalayan Times (English)                              | Kawasoti Municipality sealed for nine days                           |
| 2020-04-08                              | Kantipur (Nepali)                                      | पाहुना राखे ५० हजारजरिवाना                                           |
| 2020-02-10                              | Online Khabar (Nepali)                                 | Kharipati quarantine                                                 |
| 2020-04-16                              | Kantipur (Nepali)                                      | पीसीआरको दायरा घट्द                                                  |
| 2020-03-27                              | Kantipur (Nepali)                                      | पीपीई बनाउँदै पाटन अस्पताल                                           |
| 2020-04-06                              | Kantipur (Nepali)                                      | पीपीई भन्दै 'गाउन' पठाइया                                            |
| 2020-03-26                              | Kantipur (Nepali)                                      | पीपीईको सट्टा रनको ट                                                 |
| 2020-06-04                              | Himalayan Times (English)                              | KMC Hospital sealed                                                  |
| 2020-08-01                              | Himalayan Times (English)                              | KMC set to introduce local curriculum at schools                     |
| 2020-06-06                              | Himalayan Times (English)                              | KMC set to launch 'Cash for Work' scheme                             |
| 2020-03-30                              | Himalayan Times (English)                              | KMC to distribute relief through one-door system                     |
| 2020-03-28                              | Himalayan Times (English)                              | KMC to provide relief package to homeless, daily wage earners        |
| 2020-06-19                              | Himalayan Times (English)                              | KMC to provide relief to COVID-19-hit businesses, public             |
| 2020-08-01                              | Himalayan Times (English)                              | KMC urges people to avoid large gatherings                           |
| 2020-06-25                              | Himalayan Times (English)                              | KMC waives tax on various sectors                                    |
| 2020-04-05                              | Kantipur (Nepali)                                      | फर्काउने अस्पताललाई कारबाही गर्न निर्देशन                            |
| 2020-02-25                              | Himalayan Times (English)                              | Korea-returnees visit hospital                                       |
| 2020-04-16                              | Kantipur (Nepali)                                      | सिमानामा थपिए प्रहरी र सशस्त्रका फौज                                 |
| 2020-04-13                              | Himalayan Times (English)                              | Lab tests conducted                                                  |
| 2020-07-01                              | Kantipur (Nepali)                                      | Labrotary Added For Testing COVID-19                                 |
| 2020-03-19                              | Himalayan Times (English)                              | Lack of kits at Nepal's only testing centre hampering COVID-19 fight |
| 2020-04-18                              | Himalayan Times (English)                              | Lack of kits slows down coronavirus testing in Sudurpaschim          |
| 2020-05-01                              | Kantipur (Nepali)                                      | Land Should Not be Kept Barren                                       |
| 2020-03-22                              | Himalayan Times (English)                              | Large number of people leaving valley amid virus scare               |
| 2020-05-08                              | Himalayan Times (English)                              | Lawmakers tested for COVID, result today                             |
| 2020-04-13                              | Kantipur (Nepali)                                      | दिल्ली र गोन्जाउबाट र् वास्थ्य सामग्री ल्याइँद                       |
| 2020-03-13                              | Online Khabar (Nepali)                                 | Let's go back to the village, let's give priority to agriculture     |
| 2020-03-24                              | Himalayan Times (English)                              | Little done at Western Regional Hospital                             |



| <b>Date of publication<br/>(yyyy/mm/dd)</b> | <b>Name of news media<br/>(select from drop-down menu)</b> | <b>Title of news/headline</b>                                                     |
|---------------------------------------------|------------------------------------------------------------|-----------------------------------------------------------------------------------|
| 2020-05-01                                  | Kantipur (Nepali)                                          | Livelihood Should not be Uneased                                                  |
| 2020-04-07                                  | Kantipur (Nepali)                                          | विदेशबाट आएका सबैलाई क्वारन्टाइनमा रे ।खु : सर्वोच्च                              |
| 2020-04-07                                  | Kantipur (Nepali)                                          | विपन्नमाथि नै बढी मार                                                             |
| 2020-03-11                                  | Himalayan Times<br>(English)                               | Local bourse plunges 6.02pc on virus worries                                      |
| 2020-06-22                                  | Online Khabar (Nepali)                                     | Local government priorities in the Corona epidemic                                |
| 2020-08-30                                  | Himalayan Times<br>(English)                               | Local level buys VTM at its own expense                                           |
| 2020-08-09                                  | Himalayan Times<br>(English)                               | Local level in Jhapa imposes lockdown                                             |
| 2020-05-13                                  | Himalayan Times<br>(English)                               | Local level in Tanahun to provide textbooks at students' doorsteps                |
| 2020-04-01                                  | Himalayan Times<br>(English)                               | Local levels collecting details of returnees                                      |
| 2020-03-29                                  | Himalayan Times<br>(English)                               | Local levels in Lamjung to set up quarantine facilities                           |
| 2020-07-20                                  | Himalayan Times<br>(English)                               | Local levels to prepare list of unemployed people                                 |
| 2020-04-09                                  | Himalayan Times<br>(English)                               | Local levels told to ensure basic amenities in quarantine centres                 |
| 2020-07-19                                  | Himalayan Times<br>(English)                               | Local levels yet to expand quarantine facilities                                  |
| 2020-05-21                                  | Himalayan Times<br>(English)                               | Locals capture quarantine centre in Banke                                         |
| 2020-03-07                                  | Himalayan Times<br>(English)                               | Locals told to take precautions against spread of coronavirus                     |
| 2020-08-10                                  | Himalayan Times<br>(English)                               | Locals, kin of deceased vandalise Narayani Hospital                               |
| 2020-05-29                                  | Himalayan Times<br>(English)                               | Locals, police clash over quarantine in Rautahat                                  |
| 2020-08-04                                  | Himalayan Times<br>(English)                               | Lockdown at religious sites affects Rakshya Bandhan celebrations                  |
| 2020-06-08                                  | Himalayan Times<br>(English)                               | Lockdown defiance up in valley                                                    |
| 2020-05-10                                  | Himalayan Times<br>(English)                               | Lockdown eased in Kavre                                                           |
| 2020-05-12                                  | Himalayan Times<br>(English)                               | Lockdown eased in Udayapur                                                        |
| 2020-08-13                                  | Himalayan Times<br>(English)                               | Lockdown extended                                                                 |
| 2020-08-24                                  | Himalayan Times<br>(English)                               | Lockdown extended by a week in Sindhupalchowk                                     |
| 2020-05-18                                  | Himalayan Times<br>(English)                               | Lockdown extended by another 15 days                                              |
| 2020-04-15                                  | Himalayan Times<br>(English)                               | Lockdown extended till April 27 - Flights suspended, borders sealed till April 30 |

| <b>Date of publication (yyyy/mm/dd)</b> | <b>Name of news media (select from drop-down menu)</b> | <b>Title of news/headline</b>                                  |
|-----------------------------------------|--------------------------------------------------------|----------------------------------------------------------------|
| 2020-03-30                              | Himalayan Times (English)                              | Lockdown extended till April 7 midnight                        |
| 2020-05-04                              | Himalayan Times (English)                              | Lockdown hits immunisation drive against diarrhoea             |
| 2020-08-06                              | Himalayan Times (English)                              | Lockdown imposed in Dharan, Kailari                            |
| 2020-08-14                              | Himalayan Times (English)                              | Lockdown in Butwal                                             |
| 2020-07-22                              | Himalayan Times (English)                              | Lockdown lifted, some restrictions remain                      |
| 2020-05-06                              | Himalayan Times (English)                              | Lockdown likely to be extended, decision today                 |
| 2020-04-26                              | Himalayan Times (English)                              | Lockdown modality will be changed: CM Gurung                   |
| 2020-04-17                              | Himalayan Times (English)                              | Lockdown tightened in Dhading district                         |
| 2020-07-05                              | Himalayan Times (English)                              | Lockdown tightened in Lamjung                                  |
| 2020-03-26                              | Kantipur (Nepali)                                      | चिनियाँ कम्पनीद्वारा २ हजार किट सहयोग                          |
| 2020-04-11                              | Kantipur (Nepali)                                      | चितवनबाट हिडे रौ कोहलपुर                                       |
| 2020-04-10                              | Kantipur (Nepali)                                      | हिंसापीडितलाई भन् पीडा                                         |
| 2020-04-10                              | Kantipur (Nepali)                                      | हिडेरै १६३ किलोमिटर                                            |
| 2020-04-26                              | Himalayan Times (English)                              | Malaria seen in people staying in quarantine                   |
| 2020-03-28                              | Himalayan Times (English)                              | Man from Kailali tests positive for COVID-19                   |
| 2020-06-26                              | Himalayan Times (English)                              | Man from Lalitpur among two corona fatalities                  |
| 2020-05-29                              | Himalayan Times (English)                              | Man from Lalitpur fifth to succumb to COVID in Nepal           |
| 2020-03-26                              | Himalayan Times (English)                              | Man from UAE third Nepali with COVID                           |
| 2020-05-13                              | Himalayan Times (English)                              | Man jumps off roof to avoid quarantine                         |
| 2020-06-24                              | Himalayan Times (English)                              | Manage COVID crisis effectively: Lawmakers                     |
| 2020-07-30                              | Himalayan Times (English)                              | Masks distributed                                              |
| 2020-07-28                              | Himalayan Times (English)                              | Mass testing begins in Jhapa's Mechinagar                      |
| 2020-08-26                              | Himalayan Times (English)                              | Maternity Hospital to get 200 isolation beds                   |
| 2020-02-16                              | Online Khabar (Nepali)                                 | Mayor of Changuarayan demands immediate health desk for locals |
| 2020-06-06                              | Himalayan Times (English)                              | Mayor quarantined                                              |

| <b>Date of publication (yyyy/mm/dd)</b> | <b>Name of news media (select from drop-down menu)</b> | <b>Title of news/headline</b>                                                    |
|-----------------------------------------|--------------------------------------------------------|----------------------------------------------------------------------------------|
| 2020-06-24                              | Himalayan Times (English)                              | Mayor reaches Jumla with swabs for PCR test                                      |
| 2020-07-14                              | Himalayan Times (English)                              | Mayur company resumes bus service in Kathmandu                                   |
| 2020-06-23                              | Himalayan Times (English)                              | Meals provided for COVID infected                                                |
| 2020-08-14                              | Himalayan Times (English)                              | Mechi AMDA Hospital sealed                                                       |
| 2020-06-17                              | Himalayan Times (English)                              | Medical equipment                                                                |
| 2020-03-26                              | Himalayan Times (English)                              | Medical help thru mobile app                                                     |
| 2020-06-09                              | Himalayan Times (English)                              | Medicine sales down amid COVID-19 pandemic                                       |
| 2020-04-12                              | Himalayan Times (English)                              | Mental effects of lockdown on children a matter of growing concern among parents |
| 2020-03-21                              | Himalayan Times (English)                              | Minister Bhattarai pledges to improve sanitation at airports                     |
| 2020-06-20                              | Himalayan Times (English)                              | Minister Gyawali calls for concerted effort to fight against COVID-19 pandemic   |
| 2020-06-09                              | Himalayan Times (English)                              | MoFA submits list of citizens needing urgent evacuation                          |
| 2020-06-22                              | Himalayan Times (English)                              | MoFAGA fiat to facilitate implementation of CCMC decisions                       |
| 2020-05-07                              | Himalayan Times (English)                              | MoHP gets medical assistance worth 45.3 million rupees                           |
| 2020-04-03                              | Himalayan Times (English)                              | MoHP issues notice                                                               |
| 2020-04-28                              | Himalayan Times (English)                              | Monitoring under way                                                             |
| 2020-07-04                              | Himalayan Times (English)                              | More COVID patients discharged than diagnosed in a day                           |
| 2020-05-01                              | Kantipur (Nepali)                                      | More Discussion is Needed in Education Sector                                    |
| 2020-07-05                              | Himalayan Times (English)                              | More patients recovering from COVID-19 in Karnali                                |
| 2020-06-12                              | Himalayan Times (English)                              | More PCR machines                                                                |
| 2020-05-27                              | Himalayan Times (English)                              | More PCR tests necessary for accurate diagnosis                                  |
| 2020-03-20                              | Himalayan Times (English)                              | More people leaving Kathmandu valley                                             |
| 2020-03-31                              | Himalayan Times (English)                              | More than 2,000 lockdown violators punished                                      |
| 2020-08-26                              | Himalayan Times (English)                              | More than 4,000 COVID patients recover in Sudurpaschim                           |
| 2020-07-28                              | Himalayan Times (English)                              | More women journalists losing their jobs due to coronavirus pandemic             |

| <b>Date of publication<br/>(yyyy/mm/dd)</b> | <b>Name of news media<br/>(select from drop-down menu)</b> | <b>Title of news/headline</b>                                                 |
|---------------------------------------------|------------------------------------------------------------|-------------------------------------------------------------------------------|
| 2020-04-28                                  | Himalayan Times<br>(English)                               | Most Bhojpur quarantine centres do not meet government-set criteria           |
| 2020-03-23                                  | Himalayan Times<br>(English)                               | Most border points closed in Province 2                                       |
| 2020-04-29                                  | Himalayan Times<br>(English)                               | Most quarantine facilities in Bajura ill-managed                              |
| 2020-04-19                                  | Himalayan Times<br>(English)                               | Move to set up quarantine in Tribhuvan Park opposed                           |
| 2020-06-11                                  | Himalayan Times<br>(English)                               | MoWCSC seeks people's access to regular health services                       |
| 2020-02-05                                  | Himalayan Times<br>(English)                               | MPs flay laxity to evacuate Nepalis from China                                |
| 2020-03-08                                  | Himalayan Times<br>(English)                               | Mugu to set up health desks on border                                         |
| 2020-06-21                                  | Himalayan Times<br>(English)                               | Municipal area sealed                                                         |
| 2020-05-15                                  | Himalayan Times<br>(English)                               | Municipality sealed                                                           |
| 2020-06-23                                  | Himalayan Times<br>(English)                               | Municipality sealed over virus fears                                          |
| 2020-03-19                                  | Himalayan Times<br>(English)                               | NA conducts rehearsal to respond to COVID-19                                  |
| 2020-03-22                                  | Himalayan Times<br>(English)                               | NA personnel deployed at Jamunaha entry point                                 |
| 2020-03-17                                  | Himalayan Times<br>(English)                               | NA sets up makeshift tents for quarantine                                     |
| 2020-05-10                                  | Himalayan Times<br>(English)                               | Narayani Hospital to resume general services soon                             |
| 2020-04-20                                  | Himalayan Times<br>(English)                               | Narayani Hospital yet to start PCR testing                                    |
| 2020-02-17                                  | Himalayan Times<br>(English)                               | Nasal, throat swabs collected from 175 evacuees who finally arrive from China |
| 2020-04-07                                  | Himalayan Times<br>(English)                               | Nationwide lockdown extended till April 15                                    |
| 2020-05-07                                  | Himalayan Times<br>(English)                               | Nationwide lockdown extended till May 18                                      |
| 2020-04-27                                  | Himalayan Times<br>(English)                               | Nationwide lockdown extended till May 7                                       |
| 2020-06-18                                  | Himalayan Times<br>(English)                               | NC registers notice of attention at HoR over govt handling of COVID-19        |
| 2020-06-17                                  | Himalayan Times<br>(English)                               | NC calls for new testing guidelines                                           |
| 2020-05-07                                  | Himalayan Times<br>(English)                               | NC forms 14-member special committee                                          |
| 2020-06-01                                  | Himalayan Times<br>(English)                               | NC leaders find fault in fiscal budget                                        |

| <b>Date of publication (yyyy/mm/dd)</b> | <b>Name of news media (select from drop-down menu)</b> | <b>Title of news/headline</b>                                           |
|-----------------------------------------|--------------------------------------------------------|-------------------------------------------------------------------------|
| 2020-05-25                              | Himalayan Times (English)                              | NC proposes relief for COVID-hit businesses                             |
| 2020-03-28                              | Himalayan Times (English)                              | NC submits memo to high-level committee                                 |
| 2020-06-17                              | Himalayan Times (English)                              | NC submits memorandum to Gandaki CM                                     |
| 2020-06-16                              | Himalayan Times (English)                              | NC takes govt to task as contagion spreads                              |
| 2020-05-16                              | Himalayan Times (English)                              | NC urges government to rescue stranded Nepalis                          |
| 2020-05-14                              | Himalayan Times (English)                              | NC urges govt to act responsibly                                        |
| 2020-04-16                              | Himalayan Times (English)                              | NC urges govt to fully gear up against COVID-19                         |
| 2020-06-11                              | Himalayan Times (English)                              | NC urges govt to get its act together                                   |
| 2020-04-19                              | Himalayan Times (English)                              | NC urges govt to help stranded persons reach home safely                |
| 2020-08-14                              | Himalayan Times (English)                              | Nearly a quarter of workers lost jobs due to coronavirus: NRB           |
| 2020-06-29                              | Online Khabar (Nepali)                                 | Negative in Saudi, positive in Khotang! Sealed in Rupakot               |
| 2020-07-01                              | Kantipur (Nepali)                                      | Negligence in Home Quarantine                                           |
| 2020-01-25                              | Himalayan Times (English)                              | Nepal confirms first case of coronavirus                                |
| 2020-03-24                              | Himalayan Times (English)                              | Nepal confirms second COVID-19 case                                     |
| 2020-02-08                              | Himalayan Times (English)                              | Nepal donates masks to China                                            |
| 2020-03-25                              | Himalayan Times (English)                              | Nepal government lets in stranded Nepalis within days of sealing border |
| 2020-02-26                              | Himalayan Times (English)                              | Nepal ill-prepared for coronavirus outbreak                             |
| 2020-03-05                              | Himalayan Times (English)                              | Nepal Police to launch awareness programme                              |
| 2020-07-31                              | Himalayan Times (English)                              | Nepal to reopen Everest to climbers despite coronavirus case rise       |
| 2020-06-02                              | Himalayan Times (English)                              | Nepal volunteers become local heroes during virus pandemic              |
| 2020-01-17                              | Himalayan Times (English)                              | Nepal vulnerable to new China virus, warn doctors                       |
| 2020-06-25                              | Himalayan Times (English)                              | Nepal, World Bank sign \$100 million DPC                                |
| 2020-06-16                              | Himalayan Times (English)                              | Nepal's coronavirus count tops 6,000                                    |
| 2020-08-25                              | Himalayan Times (English)                              | Nepal's COVID death toll tops 150                                       |

| <b>Date of publication<br/>(yyyy/mm/dd)</b> | <b>Name of news media<br/>(select from drop-down menu)</b> | <b>Title of news/headline</b>                                                |
|---------------------------------------------|------------------------------------------------------------|------------------------------------------------------------------------------|
| 2020-07-22                                  | Himalayan Times<br>(English)                               | Nepal's COVID recovery rate: 69.34 per cent                                  |
| 2020-04-30                                  | Himalayan Times<br>(English)                               | Nepal's economic growth set to slump to 2.27 per cent this fiscal            |
| 2020-07-24                                  | Himalayan Times<br>(English)                               | Nepal's economic growth to shrink to 2.1 pc: WB                              |
| 2020-06-05                                  | Himalayan Times<br>(English)                               | Nepal's economy to suffer \$1.4bn hit due to coronavirus                     |
| 2020-08-17                                  | Himalayan Times<br>(English)                               | Nepali Army deployed in Birgunj metropolis                                   |
| 2020-04-18                                  | Himalayan Times<br>(English)                               | Nepali Congress asks govt to provide relief to the poor                      |
| 2020-03-05                                  | Himalayan Times<br>(English)                               | Nepali Congress postpones meetings due to coronavirus scare                  |
| 2020-07-01                                  | Himalayan Times<br>(English)                               | Nepali families face hunger, skip meals as pandemic hits remittances, Page 2 |
| 2020-01-30                                  | Kantipur (Nepali)                                          | Nepali Students in China Say, When Will We Return Home                       |
| 2020-01-27                                  | Kantipur (Nepali)                                          | Nepali Students in China Say: Rumor Sounds More Risky                        |
| 2020-02-09                                  | Himalayan Times<br>(English)                               | Nepalis returning from Hubei to be quarantined in two NEATC buildings        |
| 2020-05-30                                  | Himalayan Times<br>(English)                               | Nepalis stranded abroad to be evacuated                                      |
| 2020-03-03                                  | Himalayan Times<br>(English)                               | Nepalis urged to scrap foreign visits                                        |
| 2020-07-08                                  | Himalayan Times<br>(English)                               | Nepal's virus caseload tops 16,000                                           |
| 2020-08-23                                  | Himalayan Times<br>(English)                               | New COVID-19 rules for hospitals                                             |
| 2020-06-07                                  | Himalayan Times<br>(English)                               | NHRC concerned about journos' rights, condition in quarantine                |
| 2020-05-20                                  | Himalayan Times<br>(English)                               | NHRC tells government to respect rights of those in quarantine               |
| 2020-07-07                                  | Himalayan Times<br>(English)                               | NHRC urges govt to increase PCR tests                                        |
| 2020-04-07                                  | Kantipur (Nepali)                                          | लम्बियो लकडाउन                                                               |
| 2020-04-06                                  | Kantipur (Nepali)                                          | ललितपुरदेखि पैदलै सप्तरी                                                     |
| 2020-05-08                                  | Himalayan Times<br>(English)                               | NMA demands 10pc of total budget for health sector                           |
| 2020-06-15                                  | Himalayan Times<br>(English)                               | No COVID-19 death of Nepalis abroad recorded last week                       |
| 2020-05-01                                  | Kantipur (Nepali)                                          | No Demad of Loan in Banks After Lockdown                                     |
| 2020-06-05                                  | Himalayan Times<br>(English)                               | No insurance for coronavirus from today                                      |
| 2020-07-16                                  | Himalayan Times<br>(English)                               | No jobs, few crops: Coronavirus, pests leave people fearing hunger           |
| 2020-06-29                                  | Himalayan Times<br>(English)                               | No new COVID death of Nepalis abroad reported last week                      |

| Date of publication (yyyy/mm/dd) | Name of news media (select from drop-down menu) | Title of news/headline                                   |
|----------------------------------|-------------------------------------------------|----------------------------------------------------------|
| 2020-04-01                       | Himalayan Times (English)                       | No new COVID-19 case reported: Health ministry           |
| 2020-06-19                       | Himalayan Times (English)                       | No one attends funeral of coronavirus victim             |
| 2020-04-05                       | Himalayan Times (English)                       | No preparation to fight COVID-19 in Jajarkot             |
| 2020-01-27                       | Himalayan Times (English)                       | Novel coronavirus scare                                  |
| 2020-07-28                       | Himalayan Times (English)                       | NRB pins relief to COVID impact                          |
| 2020-04-28                       | Himalayan Times (English)                       | NRB to bring relief package for businesses next week     |
| 2020-04-12                       | Kantipur (Nepali)                               | लकडाउन बढाउन मुख्यमन्त्रीहरूको सुझाव                     |
| 2020-04-15                       | Kantipur (Nepali)                               | लकडाउन लम्बियो                                           |
| 2020-04-13                       | Kantipur (Nepali)                               | लकडाउनमा बलात्कारका ४० घटना                              |
| 2020-04-21                       | Kantipur (Nepali)                               | लकडाउनमा महिला असुरक्षित                                 |
| 2020-04-16                       | Kantipur (Nepali)                               | लकडाउनले मात्रै समाधान हुँदैन : कांग्रेस                 |
| 2020-03-25                       | Kantipur (Nepali)                               | लकडाउनकोआंशिक उल्लघन                                     |
| 2020-04-14                       | Kantipur (Nepali)                               | यसरी घरमै पढाइ                                           |
| 2020-04-11                       | Kantipur (Nepali)                               | यसरी तयार हुदैछ विशेष अस्पताल                            |
| 2020-04-20                       | Kantipur (Nepali)                               | यसरी हुदै छ १३ संक्रमितको हेरचाह                         |
| 2020-08-06                       | Himalayan Times (English)                       | Odd-even rule back                                       |
| 2020-08-29                       | Himalayan Times (English)                       | Odd-even rule for vehicles in Kaski                      |
| 2020-04-12                       | Kantipur (Nepali)                               | युवाले बनाए 'सेनिटाइजिङ टनेल'                            |
| 2020-02-07                       | Himalayan Times (English)                       | Oli directs authorities to bring back Nepalis from China |
| 2020-04-23                       | Himalayan Times (English)                       | Oli in favour of letting leaders split parties           |
| 2020-03-14                       | Himalayan Times (English)                       | On-arrival visas scrapped till April 30                  |
| 2020-08-31                       | Himalayan Times (English)                       | One house, one person PCR test in Durgabhagawati RM      |
| 2020-05-22                       | Himalayan Times (English)                       | One kept in isolation                                    |
| 2020-08-06                       | Himalayan Times (English)                       | One more COVID-19 death in Parsa, total casualties 17    |
| 2020-06-30                       | Himalayan Times (English)                       | One more death                                           |
| 2020-06-19                       | Himalayan Times (English)                       | One tests positive                                       |
| 2020-05-04                       | Himalayan Times (English)                       | One tests positive                                       |
| 2020-08-19                       | Himalayan Times (English)                       | One-week curfew clamped in valley                        |

| <b>Date of publication (yyyy/mm/dd)</b> | <b>Name of news media (select from drop-down menu)</b> | <b>Title of news/headline</b>                                        |
|-----------------------------------------|--------------------------------------------------------|----------------------------------------------------------------------|
| 2020-06-29                              | Himalayan Times (English)                              | One-year-old recovers                                                |
| 2020-06-23                              | Himalayan Times (English)                              | Only lockdown has eased, for many life's looking more difficult now  |
| 2020-08-27                              | Himalayan Times (English)                              | Opposition parties find fault with government's response to pandemic |
| 2020-07-03                              | Himalayan Times (English)                              | Over 2,000 minors infected                                           |
| 2020-03-31                              | Himalayan Times (English)                              | Over 500 Nepali migrant workers stranded on border                   |
| 2020-06-27                              | Himalayan Times (English)                              | PA meet obstructed over quarantine guideline, Page 2                 |
| 2020-07-18                              | Himalayan Times (English)                              | Panchthar district free of coronavirus cases                         |
| 2020-08-22                              | Himalayan Times (English)                              | Pandemic dampens Teej spirit                                         |
| 2020-04-21                              | Himalayan Times (English)                              | Panel to assess corona impact on industries                          |
| 2020-05-02                              | Kantipur (Nepali)                                      | Parliamentary Committee Directs to Ease Lockdown                     |
| 2020-03-21                              | Himalayan Times (English)                              | Partial lockdown from Monday                                         |
| 2020-08-25                              | Himalayan Times (English)                              | Partial lockdown in Gauradaha                                        |
| 2020-06-05                              | Himalayan Times (English)                              | Party venues to host foreign returnees                               |
| 2020-07-21                              | Himalayan Times (English)                              | Pashupati all set to reopen for public                               |
| 2020-04-09                              | Himalayan Times (English)                              | Patient dies in isolation ward                                       |
| 2020-02-01                              | Himalayan Times (English)                              | Patient suspected of coronavirus infection referred to Kathmandu     |
| 2020-08-22                              | Himalayan Times (English)                              | Patient tests positive for coronavirus, hospital sealed              |
| 2020-04-19                              | Himalayan Times (English)                              | Patient treated in isolation ward dies                               |
| 2020-05-17                              | Himalayan Times (English)                              | Patients complain about lack of care, inadequate food                |
| 2020-04-02                              | Himalayan Times (English)                              | Patients with fever being turned away due to COVID fear              |
| 2020-07-03                              | Himalayan Times (English)                              | Pay attention to mental health, prevention of suicide: WHO           |
| 2020-08-04                              | Himalayan Times (English)                              | PCR lab set up                                                       |
| 2020-08-19                              | Himalayan Times (English)                              | PCR lab yet to come into operation in Jhapa                          |
| 2020-06-03                              | Himalayan Times (English)                              | PCR report now mandatory for COVID-19 insurance                      |



| <b>Date of publication<br/>(yyyy/mm/dd)</b> | <b>Name of news media<br/>(select from drop-down menu)</b> | <b>Title of news/headline</b>                                                                      |
|---------------------------------------------|------------------------------------------------------------|----------------------------------------------------------------------------------------------------|
| 2020-06-18                                  | Himalayan Times<br>(English)                               | PCR report yet to come even after two weeks                                                        |
| 2020-08-31                                  | Himalayan Times<br>(English)                               | PCR test cheaper                                                                                   |
| 2020-08-17                                  | Himalayan Times<br>(English)                               | PCR tests expanding in Sudurpaschim                                                                |
| 2020-06-10                                  | Himalayan Times<br>(English)                               | Peaceful protesters beaten up                                                                      |
| 2020-04-10                                  | Himalayan Times<br>(English)                               | Penniless and nothing to eat                                                                       |
| 2020-03-30                                  | Himalayan Times<br>(English)                               | People mentally stressed, doctors suggest they limit social media                                  |
| 2020-06-01                                  | Himalayan Times<br>(English)                               | People opting to sanitise homes, office spaces as COVID-19 infections keep rising everyday, Page 6 |
| 2020-04-24                                  | Himalayan Times<br>(English)                               | People's representatives feud mars relief distribution in Sunsari                                  |
| 2020-06-24                                  | Online Khabar (Nepali)                                     | Person in quarantine committed suicide                                                             |
| 2020-06-18                                  | Himalayan Times<br>(English)                               | Person who killed self tests COVID positive                                                        |
| 2020-04-19                                  | Kantipur (Nepali)                                          | उपत्यकाबाट बाहिरिनेमाथि थप कडाइ                                                                    |
| 2020-06-02                                  | Himalayan Times<br>(English)                               | Plan to evacuate Nepalis from abroad unveiled                                                      |
| 2020-06-02                                  | Himalayan Times<br>(English)                               | Plan to evacuate Nepalis from abroad unveiled, Page 1                                              |
| 2020-05-16                                  | Himalayan Times<br>(English)                               | Plan to revive COVID-hit economy missing                                                           |
| 2020-05-26                                  | Himalayan Times<br>(English)                               | Plan to set up coronavirus treatment centre at Mechi Zonal Hospital draws flak                     |
| 2020-08-19                                  | Himalayan Times<br>(English)                               | Plasma therapy used to treat COVID patient in Dharan                                               |
| 2020-07-31                                  | Himalayan Times<br>(English)                               | Pokhara hotels back in business                                                                    |
| 2020-04-18                                  | Himalayan Times<br>(English)                               | Pokhara metropolis to manage free food                                                             |
| 2020-06-26                                  | Himalayan Times<br>(English)                               | Pokhara residents protest victim's burial                                                          |
| 2020-08-02                                  | Himalayan Times<br>(English)                               | Police arrest dozens of protesters                                                                 |
| 2020-03-22                                  | Himalayan Times<br>(English)                               | Police begin crackdown on rumour-mongers                                                           |
| 2020-06-14                                  | Himalayan Times<br>(English)                               | Police fire tear gas, shots to control quarantined people                                          |
| 2020-06-10                                  | Himalayan Times<br>(English)                               | Police halt operation of businesses in valley                                                      |
| 2020-08-29                                  | Himalayan Times<br>(English)                               | Police halt home delivery service, arrest staff                                                    |

| <b>Date of publication (yyyy/mm/dd)</b> | <b>Name of news media (select from drop-down menu)</b> | <b>Title of news/headline</b>                                                          |
|-----------------------------------------|--------------------------------------------------------|----------------------------------------------------------------------------------------|
| 2020-07-30                              | Himalayan Times (English)                              | Police launch COVID awareness campaign                                                 |
| 2020-03-29                              | Himalayan Times (English)                              | Police personnel at high risk of contracting COVID-19                                  |
| 2020-03-19                              | Himalayan Times (English)                              | Police seize one million masks                                                         |
| 2020-04-09                              | Himalayan Times (English)                              | Police using man-catcher to detain lockdown violators                                  |
| 2020-06-08                              | Himalayan Times (English)                              | Poor lab testing capacity keeps people waiting for reports                             |
| 2020-04-09                              | Himalayan Times (English)                              | Poor people get relief                                                                 |
| 2020-03-22                              | Himalayan Times (English)                              | Precaution adopted at Chhinnamasta temple                                              |
| 2020-06-01                              | Himalayan Times (English)                              | Pregnant woman recovers from COVID-19 in five days                                     |
| 2020-06-10                              | Himalayan Times (English)                              | Pregnant woman with COVID goes under knife                                             |
| 2020-07-26                              | Himalayan Times (English)                              | Preparations on to reopen hotels                                                       |
| 2020-03-18                              | Himalayan Times (English)                              | Preparations to cope with coronavirus begin in Khotang, isolation ward set up          |
| 2020-05-11                              | Himalayan Times (English)                              | Preparations under way to add more quarantine facilities in Kavre                      |
| 2020-06-26                              | Online Khabar (Nepali)                                 | Prepared Physiotherapy guideline for Corona infected                                   |
| 2020-03-06                              | Online Khabar (Nepali)                                 | Preparing to table a proposal of urgent public importance in Parliament about COVID-19 |
| 2020-06-25                              | Himalayan Times (English)                              | Prez meets leaders                                                                     |
| 2020-06-06                              | Himalayan Times (English)                              | Prez sends message                                                                     |
| 2020-03-28                              | Himalayan Times (English)                              | Private sector concerned about delay in stimulus packages                              |
| 2020-04-10                              | Himalayan Times (English)                              | Private sector keen to mass produce PPE, seeks incentives                              |
| 2020-03-31                              | Himalayan Times (English)                              | Private sector rues inadequate relief package                                          |
| 2020-05-19                              | Himalayan Times (English)                              | Private sector threatens to take to the streets if demands not met in budget           |
| 2020-08-19                              | Himalayan Times (English)                              | Prohibitory order extended by 15 more days in Saptari                                  |
| 2020-08-30                              | Himalayan Times (English)                              | Prohibitory order extended in Kailali, Jhapa districts                                 |
| 2020-06-04                              | Himalayan Times (English)                              | Prohibitory order imposed in Gulmi, Jumla to contain coronavirus spread                |
| 2020-08-22                              | Himalayan Times (English)                              | Prohibitory order imposed in Kailali                                                   |

| <b>Date of publication (yyyy/mm/dd)</b> | <b>Name of news media (select from drop-down menu)</b> | <b>Title of news/headline</b>                                                                     |
|-----------------------------------------|--------------------------------------------------------|---------------------------------------------------------------------------------------------------|
| 2020-08-06                              | Himalayan Times (English)                              | Prohibitory order in 15 districts to curb COVID                                                   |
| 2020-06-06                              | Himalayan Times (English)                              | Prohibitory order in two local levels                                                             |
| 2020-08-16                              | Himalayan Times (English)                              | Prohibitory order lifted in Banke district                                                        |
| 2020-08-21                              | Himalayan Times (English)                              | Prohibitory order, lockdown inadequate to fight COVID-19 pandemic, says NC                        |
| 2020-08-27                              | Himalayan Times (English)                              | Prohibitory orders extended till September 2                                                      |
| 2020-08-26                              | Himalayan Times (English)                              | Prohibitory orders in valley extended till September 2                                            |
| 2020-03-26                              | Himalayan Times (English)                              | Protective gear shortage imperils health workers                                                  |
| 2020-02-15                              | Online Khabar (Nepali)                                 | Protest in Nagarkot regarding quarantine for pilots and health workers who bring Chinese students |
| 2020-03-22                              | Himalayan Times (English)                              | Province 1 government to construct 50-bed hospital                                                |
| 2020-03-21                              | Himalayan Times (English)                              | Province 1 govt to set up 50-bed provisional hospital in Biratnagar                               |
| 2020-04-13                              | Himalayan Times (English)                              | Province 2 government expedites bid to trace contacts of three positive cases                     |
| 2020-04-07                              | Himalayan Times (English)                              | Provinces following federal government's one-door policy                                          |
| 2020-03-24                              | Kantipur (Nepali)                                      | एक साता मुलुक बन्द                                                                                |
| 2020-04-08                              | Kantipur (Nepali)                                      | एकै दिन दुई सयको स्वाब संकलन                                                                      |
| 2020-06-24                              | Himalayan Times (English)                              | Quarantined youth kills self                                                                      |
| 2020-05-02                              | Himalayan Times (English)                              | Quarantine centres in Bhojpur ill-managed, lack basic facilities                                  |
| 2020-04-05                              | Himalayan Times (English)                              | Quarantine centres sans basic facilities                                                          |
| 2020-07-06                              | Himalayan Times (English)                              | Quarantine death                                                                                  |
| 2020-07-05                              | Himalayan Times (English)                              | Quarantine facilities emptying in Province 2                                                      |
| 2020-05-28                              | Himalayan Times (English)                              | Quarantine facilities in Tanahun ill-managed                                                      |
| 2020-05-27                              | Himalayan Times (English)                              | Quarantine facility poses risk of virus spread                                                    |
| 2020-02-04                              | Himalayan Times (English)                              | Quarantine location to be finalised today                                                         |
| 2020-04-07                              | Himalayan Times (English)                              | Quarantine period could be extended                                                               |
| 2020-06-30                              | Kantipur (Nepali)                                      | Quarantine Remained Unsuccessful                                                                  |
| 2020-06-15                              | Himalayan Times (English)                              | Quarantine set up                                                                                 |

| <b>Date of publication<br/>(yyyy/mm/dd)</b> | <b>Name of news media<br/>(select from drop-down menu)</b> | <b>Title of news/headline</b>                                      |
|---------------------------------------------|------------------------------------------------------------|--------------------------------------------------------------------|
| 2020-06-28                                  | Himalayan Times<br>(English)                               | Quarantine shelters emptying in Banke                              |
| 2020-07-12                                  | Himalayan Times<br>(English)                               | Quarantined elderly dies                                           |
| 2020-05-29                                  | Himalayan Times<br>(English)                               | Quarantined people living in poorly managed facilities             |
| 2020-05-09                                  | Himalayan Times<br>(English)                               | Quarantined people sent home without any test                      |
| 2020-06-18                                  | Himalayan Times<br>(English)                               | Quarantined people sent home without test results, villagers panic |
| 2020-06-02                                  | Himalayan Times<br>(English)                               | Quarantined people's swabs collected after minor's death           |
| 2020-06-02                                  | Himalayan Times<br>(English)                               | Quarantined people's swabs collected after minor's death, Page 2   |
| 2020-06-08                                  | Himalayan Times<br>(English)                               | Quarantined youths die                                             |
| 2020-06-03                                  | Himalayan Times<br>(English)                               | Quarantines in Sudurpaschim bursting at seams                      |
| 2020-06-22                                  | Online Khabar (Nepali)                                     | Question on Health Minister and Advisor Karki regarding Omni case  |
| 2020-03-25                                  | Kantipur (Nepali)                                          | चैत १५ गतेभित्र आपूर्ति गरिसकिने                                   |
| 2020-05-31                                  | Himalayan Times<br>(English)                               | Rajbiraj-based hospital to begin tests for coronavirus             |
| 2020-08-14                                  | Himalayan Times<br>(English)                               | Ramechhap municipal office halts services after staff infected     |
| 2020-04-06                                  | Himalayan Times<br>(English)                               | Rapid coronavirus antibodies tests begin today                     |
| 2020-04-08                                  | Himalayan Times<br>(English)                               | Rapid diagnostic test starts in Kailali, Kanchanpur                |
| 2020-04-13                                  | Himalayan Times<br>(English)                               | Rapid diagnostic testing picks up pace in Gandaki Province         |
| 2020-04-10                                  | Himalayan Times<br>(English)                               | Rapid diagnostic tests carried out                                 |
| 2020-02-15                                  | Himalayan Times<br>(English)                               | Rasuwagadhi border to be closed till February 21                   |
| 2020-01-30                                  | Himalayan Times<br>(English)                               | Rasuwagadi border shut over coronavirus threat                     |
| 2020-03-23                                  | Himalayan Times<br>(English)                               | Rautahat border points shut                                        |
| 2020-08-16                                  | Himalayan Times<br>(English)                               | Rautahat local levels join hands to set up isolation ward, PCR lab |
| 2020-04-12                                  | Himalayan Times<br>(English)                               | RDT kits in Nawalpur                                               |
| 2020-06-27                                  | Online Khabar (Nepali)                                     | Recovered from Corona but scared of neighbours                     |
| 2020-05-04                                  | Himalayan Times<br>(English)                               | Recovered patients in hospital again                               |

| <b>Date of publication (yyyy/mm/dd)</b> | <b>Name of news media (select from drop-down menu)</b> | <b>Title of news/headline</b>                                                   |
|-----------------------------------------|--------------------------------------------------------|---------------------------------------------------------------------------------|
| 2020-07-09                              | Himalayan Times (English)                              | Relief distributed                                                              |
| 2020-05-08                              | Himalayan Times (English)                              | Relief distributed                                                              |
| 2020-07-16                              | Himalayan Times (English)                              | Relief distributed among farmers                                                |
| 2020-05-12                              | Himalayan Times (English)                              | Relief distributed among more than 5,000 families                               |
| 2020-03-30                              | Himalayan Times (English)                              | Relief for hunkered down populace                                               |
| 2020-07-25                              | Himalayan Times (English)                              | Relief materials distributed                                                    |
| 2020-04-10                              | Himalayan Times (English)                              | Relief packages elude the poorest of the poor                                   |
| 2020-04-30                              | Himalayan Times (English)                              | Relief provided                                                                 |
| 2020-04-23                              | Himalayan Times (English)                              | Remittances to Nepal to slump 14 per cent                                       |
| 2020-01-26                              | Kantipur (Nepali)                                      | Request Hospitals to Submit Workplan                                            |
| 2020-05-01                              | Kantipur (Nepali)                                      | Request To Invest More On Infrastructure                                        |
| 2020-05-28                              | Himalayan Times (English)                              | Restrictions eased in Bhulke after a month                                      |
| 2020-03-30                              | Himalayan Times (English)                              | Returnee migrant workers from India resist quarantine                           |
| 2020-04-06                              | Himalayan Times (English)                              | Returnees in Lamjung refuse to stay in quarantine                               |
| 2020-04-30                              | Himalayan Times (English)                              | Returnees not staying in self-quarantine in Kavre                               |
| 2020-02-26                              | Himalayan Times (English)                              | Revenue collection nil at Rasuwa customs                                        |
| 2020-07-17                              | Himalayan Times (English)                              | Reverse migration puts spotlight on social, economic reintegration of returnees |
| 2020-04-01                              | Himalayan Times (English)                              | Reverse migration spreads to Nepal                                              |
| 2020-04-18                              | Himalayan Times (English)                              | Reverse migration: Govt told to arrange transport for those trudging back home  |
| 2020-04-01                              | Himalayan Times (English)                              | Rise in GBV, sexual abuse cases feared                                          |
| 2020-01-26                              | Kantipur (Nepali)                                      | Risk of Novel Corona Virus (Editorial)                                          |
| 2020-04-14                              | Himalayan Times (English)                              | Rs 1.98 billion collected for coronavirus fund                                  |
| 2020-05-30                              | Himalayan Times (English)                              | Rs 210-billion stimulus package in budget: FinMin                               |
| 2020-04-22                              | Himalayan Times (English)                              | Rs 4 billion already spent to combat coronavirus                                |
| 2020-04-09                              | Himalayan Times (English)                              | RTPCR machine installed in Dhangadi                                             |

| <b>Date of publication (yyyy/mm/dd)</b> | <b>Name of news media (select from drop-down menu)</b> | <b>Title of news/headline</b>                                        |
|-----------------------------------------|--------------------------------------------------------|----------------------------------------------------------------------|
| 2020-08-10                              | Himalayan Times (English)                              | Rural municipality in Jhapa imposes lockdown                         |
| 2020-04-09                              | Kantipur (Nepali)                                      | कस्तो पीपीई सुरक्षित ?                                               |
| 2020-04-09                              | Kantipur (Nepali)                                      | कसलाई कति प्रोत्साहन भत्ता ?                                         |
| 2020-04-05                              | Kantipur (Nepali)                                      | कैलाली, कञ्चनपुर र बागलुङमा ' व्यापिड टे स्ट' बढाइन                  |
| 2020-03-26                              | Kantipur (Nepali)                                      | कर्णालीका १०३ जना क्वारन्टाइनमा                                      |
| 2020-03-17                              | Online Khabar (Nepali)                                 | Sajha bus started providing service only after spraying sanitizer    |
| 2020-01-23                              | Kantipur (Nepali)                                      | Sample of Suspected Patient Has Sent to Hong Kong                    |
| 2020-01-21                              | Kantipur (Nepali)                                      | Sample of Suspected Patient sent to Aboard for Testing               |
| 2020-03-01                              | Himalayan Times (English)                              | Samples collected for second time from quarantined Nepalis           |
| 2020-04-27                              | Himalayan Times (English)                              | Sanitiser tunnel                                                     |
| 2020-07-17                              | Himalayan Times (English)                              | Saptari dwellers discard lockdown rules as Bihar poses virus threat  |
| 2020-06-05                              | Himalayan Times (English)                              | Saptari's first Covid patient recovers                               |
| 2020-03-05                              | Himalayan Times (English)                              | Sauraha hotels start cutting down on staff                           |
| 2020-07-11                              | Himalayan Times (English)                              | Saving lives vital, NCP feud trivial, says PM Oli                    |
| 2020-04-17                              | Himalayan Times (English)                              | SC asks govt to bring back migrant Nepalis stranded in foreign lands |
| 2020-06-15                              | Himalayan Times (English)                              | Second death in Gulmi                                                |
| 2020-06-24                              | Himalayan Times (English)                              | Second death in Dailekh                                              |
| 2020-05-04                              | Himalayan Times (English)                              | Security on Nepal-India border to be tightened                       |
| 2020-05-06                              | Himalayan Times (English)                              | Security tightened in Bhimad Municipality                            |
| 2020-05-03                              | Himalayan Times (English)                              | SEE new dates uncertain due to govt indecision on lockdown           |
| 2020-03-28                              | Himalayan Times (English)                              | Senior citizens to get Rs 10,000 per month                           |
| 2020-02-12                              | Himalayan Times (English)                              | Separate room for coronavirus patients                               |
| 2020-04-08                              | Himalayan Times (English)                              | Seti Hospital health workers at risk                                 |
| 2020-06-04                              | Himalayan Times (English)                              | Seti Provincial Hospital refuses to admit COVID patients             |
| 2020-08-06                              | Himalayan Times (English)                              | Seven govt offices in Banke district sealed                          |
| 2020-05-06                              | Himalayan Times (English)                              | Seven more COVID cases detected in Nepalgunj                         |
| 2020-08-19                              | Himalayan Times (English)                              | Seven more succumb to new coronavirus; Nepal toll 114                |

| Date of publication (yyyy/mm/dd) | Name of news media (select from drop-down menu) | Title of news/headline                                                    |
|----------------------------------|-------------------------------------------------|---------------------------------------------------------------------------|
| 2020-05-03                       | Himalayan Times (English)                       | Seven police personnel quarantined                                        |
| 2020-08-26                       | Himalayan Times (English)                       | Seven succumb to infection                                                |
| 2020-07-02                       | Himalayan Times (English)                       | Seventeen more COVID cases in valley                                      |
| 2020-05-07                       | Himalayan Times (English)                       | Seventeen of a Parsa family test positive for coronavirus infection       |
| 2020-04-10                       | Kantipur (Nepali)                               | कोरोना कोषमा ३० लाख                                                       |
| 2020-04-10                       | Kantipur (Nepali)                               | काठमाडौंबाट पैदलै बाँके-बर्दिया                                           |
| 2020-05-06                       | Himalayan Times (English)                       | Shortage of laboratory materials imperils novel coronavirus testing       |
| 2020-08-28                       | Himalayan Times (English)                       | Shortage of VTM mars swab collection                                      |
| 2020-06-02                       | Himalayan Times (English)                       | Single-day COVID surge tops 200                                           |
| 2020-08-20                       | Himalayan Times (English)                       | Six fatalities                                                            |
| 2020-05-07                       | Himalayan Times (English)                       | Six Indians discharged                                                    |
| 2020-08-21                       | Himalayan Times (English)                       | Six succumb to virus                                                      |
| 2020-03-31                       | Himalayan Times (English)                       | Six youths who flew with man who tested positive for COVID-19 quarantined |
| 2020-05-04                       | Himalayan Times (English)                       | Sixteen test positive for neo-coronavirus                                 |
| 2020-06-13                       | Himalayan Times (English)                       | Sixteenth victim                                                          |
| 2020-03-27                       | Kantipur (Nepali)                               | क्वारेन्टाइनबाट धमाधम भाग्द                                               |
| 2020-03-24                       | Kantipur (Nepali)                               | क्वारेन्टाइनबाट ५४० जना भाग                                               |
| 2020-04-16                       | Kantipur (Nepali)                               | क्वारेन्टाइनमै किरिया                                                     |
| 2020-03-26                       | Kantipur (Nepali)                               | क्वारेन्टाइनमाे राख्नै मुस्किल                                            |
| 2020-05-01                       | Kantipur (Nepali)                               | Slow Speed of Pandemic                                                    |
| 2020-05-01                       | Kantipur (Nepali)                               | Slow Testing in Risky Zone                                                |
| 2020-06-11                       | Himalayan Times (English)                       | Space crunch forces COVID suspects into tent                              |
| 2020-08-01                       | Himalayan Times (English)                       | Staffer gets infected, Banke district court closed                        |
| 2020-01-26                       | Himalayan Times (English)                       | STIDH admits 2019-nCov suspects                                           |
| 2020-03-16                       | Himalayan Times (English)                       | Stock of kits to transport coronavirus samples limited                    |
| 2020-06-08                       | Himalayan Times (English)                       | Stop RDTs: PA members                                                     |
| 2020-02-12                       | Online Khabar (Nepali)                          | Story behind delaying in rescue of Nepalis from China                     |
| 2020-04-13                       | Himalayan Times (English)                       | Substandard rice distributed to poor people in Bajura                     |

| <b>Date of publication (yyyy/mm/dd)</b> | <b>Name of news media (select from drop-down menu)</b> | <b>Title of news/headline</b>                                                  |
|-----------------------------------------|--------------------------------------------------------|--------------------------------------------------------------------------------|
| 2020-06-30                              | Kantipur (Nepali)                                      | Sucide Can be Prevented Through Psychosocial Couseling                         |
| 2020-06-30                              | Kantipur (Nepali)                                      | Sucide or Murder!                                                              |
| 2020-04-06                              | Himalayan Times (English)                              | Sudurpaschim Province expediting efforts to contain pandemic                   |
| 2020-05-01                              | Kantipur (Nepali)                                      | Suggest to Make Lockdown Ease                                                  |
| 2020-07-29                              | Himalayan Times (English)                              | Suicide case tests COVID positive                                              |
| 2020-04-06                              | Himalayan Times (English)                              | Sukraraj hospital needs anaesthetists, critical care physicians                |
| 2020-07-31                              | Himalayan Times (English)                              | Sunsari denizens cautioned on threat of COVID-19 community spread              |
| 2020-03-06                              | Himalayan Times (English)                              | Supply of essentials intact, says govt                                         |
| 2020-06-06                              | Himalayan Times (English)                              | Surgical, N-95 masks mandatory in airports                                     |
| 2020-03-19                              | Himalayan Times (English)                              | Surveillance room established at Trinagar customs point as preventive measure  |
| 2020-05-03                              | Himalayan Times (English)                              | Swab collection booth                                                          |
| 2020-06-06                              | Himalayan Times (English)                              | Swab collection halted for five days in Sudurpaschim                           |
| 2020-06-09                              | Himalayan Times (English)                              | Swab collection halted in Jajarkot                                             |
| 2020-07-13                              | Himalayan Times (English)                              | Swab collection slows down                                                     |
| 2020-08-09                              | Himalayan Times (English)                              | Swab sample collected from communities                                         |
| 2020-04-13                              | Kantipur (Nepali)                                      | कहाँ-कहाँ घुमे तीन संक्रमित ?                                                  |
| 2020-01-30                              | Kantipur (Nepali)                                      | Symptom Could be Seen within 10 Days                                           |
| 2020-06-26                              | Himalayan Times (English)                              | Tanahun's Myagde RM closed for a week                                          |
| 2020-03-18                              | Himalayan Times (English)                              | Taskforce to tackle virus spread formed                                        |
| 2020-02-11                              | Himalayan Times (English)                              | Tatopani border closed                                                         |
| 2020-06-04                              | Himalayan Times (English)                              | Tax clearance deadline put off till June 21                                    |
| 2020-07-01                              | Kantipur (Nepali)                                      | Taxi Drivers Are in Strike                                                     |
| 2020-08-25                              | Himalayan Times (English)                              | Technicians busy conducting PCR tests                                          |
| 2020-03-21                              | Himalayan Times (English)                              | Teku lab to get kits for testing 20,000 samples                                |
| 2020-06-12                              | Himalayan Times (English)                              | Temporary COVID-19 hospital established                                        |
| 2020-03-21                              | Himalayan Times (English)                              | Temporary hospital established to treat COVID-19 patients comes into operation |



| <b>Date of publication (yyyy/mm/dd)</b> | <b>Name of news media (select from drop-down menu)</b> | <b>Title of news/headline</b>                                                         |
|-----------------------------------------|--------------------------------------------------------|---------------------------------------------------------------------------------------|
| 2020-03-15                              | Himalayan Times (English)                              | Tension grips Nepalgunj as two cases of COVID-19 confirmed in Lucknow                 |
| 2020-06-05                              | Himalayan Times (English)                              | Tenth COVID death                                                                     |
| 2020-04-01                              | Himalayan Times (English)                              | Test for virus to start in Pokhara                                                    |
| 2020-05-08                              | Himalayan Times (English)                              | Testing expanded in coronavirus hotspots                                              |
| 2020-07-04                              | Himalayan Times (English)                              | Testing extended                                                                      |
| 2020-01-28                              | Himalayan Times (English)                              | Testing for coronavirus starts in Nepal                                               |
| 2020-05-01                              | Kantipur (Nepali)                                      | Testing of COVID-19 has Stopped in the Absence of Kit                                 |
| 2020-05-20                              | Himalayan Times (English)                              | Thakre Rural Municipality sealed                                                      |
| 2020-02-09                              | Online Khabar (Nepali)                                 | The 'main criteria' for the rescue of Nepalis in Wuhan have yet to be met!            |
| 2020-07-01                              | Kantipur (Nepali)                                      | The Residents of Kathmandu Are Doing Negligence                                       |
| 2020-06-25                              | Online Khabar (Nepali)                                 | The villagers sacrificed animals to drive away Corona, the leader says - superstition |
| 2020-03-15                              | Online Khabar (Nepali)                                 | The work of the Ministry of Health for Corona: 'Theory' is fine                       |
| 2020-06-22                              | Himalayan Times (English)                              | Third death in Gulmi                                                                  |
| 2020-05-01                              | Kantipur (Nepali)                                      | Thousands are Happy and Millions are at Waiting                                       |
| 2020-08-05                              | Himalayan Times (English)                              | Thousands return home, desire to work                                                 |
| 2020-08-06                              | Himalayan Times (English)                              | Three COVID suspects die in Saptari district                                          |
| 2020-08-29                              | Himalayan Times (English)                              | Three COVID-19 patients die at Dharan hospital                                        |
| 2020-08-24                              | Himalayan Times (English)                              | Three more fatalities                                                                 |
| 2020-07-28                              | Himalayan Times (English)                              | Three more succumb to COVID-19                                                        |
| 2020-06-27                              | Himalayan Times (English)                              | Three of 593 new COVID cases from Kathmandu                                           |
| 2020-01-27                              | Kantipur (Nepali)                                      | Three People are Suspected to Be Corona Infected                                      |
| 2020-08-09                              | Himalayan Times (English)                              | Three persons succumb to COVID                                                        |
| 2020-04-24                              | Himalayan Times (English)                              | Three recover, discharged                                                             |
| 2020-08-16                              | Himalayan Times (English)                              | Three succumb to coronavirus                                                          |
| 2020-08-18                              | Himalayan Times (English)                              | Three succumb to the infection                                                        |
| 2020-03-31                              | Himalayan Times (English)                              | Three suspected COVID-19 patients die while undergoing treatment in capital hospitals |

| <b>Date of publication<br/>(yyyy/mm/dd)</b> | <b>Name of news media<br/>(select from drop-down menu)</b> | <b>Title of news/headline</b>                                            |
|---------------------------------------------|------------------------------------------------------------|--------------------------------------------------------------------------|
| 2020-06-21                                  | Online Khabar (Nepali)                                     | Three villages sealed when one pregnant woman got COVID-19 positive      |
| 2020-04-12                                  | Himalayan Times (English)                                  | Three virus infected persons test positive again                         |
| 2020-07-14                                  | Himalayan Times (English)                                  | Three wards of Lalitpur's Mahalaxmi Municipality sealed                  |
| 2020-05-02                                  | Himalayan Times (English)                                  | Throat swabs                                                             |
| 2020-01-28                                  | Himalayan Times (English)                                  | TIA told to manage separate service for arrivals from China              |
| 2020-06-26                                  | Online Khabar (Nepali)                                     | Tighten Lockdown in Bhimsen Thapa Rural municipality                     |
| 2020-04-17                                  | Kantipur (Nepali)                                          | तीन सातापछि पनि र हिरहन्छ संक्रमण                                        |
| 2020-05-01                                  | Kantipur (Nepali)                                          | To Receive Relief Package One has to Obey the Government                 |
| 2020-03-27                                  | Kantipur (Nepali)                                          | तयारी अवस्थामा हब अस्पताल                                                |
| 2020-03-01                                  | Online Khabar (Nepali)                                     | Tokha Festival has been postponed due to Corona's terror                 |
| 2020-06-02                                  | Himalayan Times (English)                                  | Tourist standard hotels agree to government rate for quarantine          |
| 2020-01-29                                  | Online Khabar (Nepali)                                     | Tourists are barred from entering Nepal from Rasuwagadhi and Tatopani    |
| 2020-06-04                                  | Himalayan Times (English)                                  | Traders defy lockdown as patience runs thin                              |
| 2020-07-14                                  | Himalayan Times (English)                                  | Transport workers demand salary for lockdown period in Gandaki           |
| 2020-04-17                                  | Himalayan Times (English)                                  | Trauma centre starts RDT for patients who need surgery                   |
| 2020-06-30                                  | Kantipur (Nepali)                                          | Treated Like Prisoner                                                    |
| 2020-06-30                                  | Kantipur (Nepali)                                          | Treated Like Prisoner                                                    |
| 2020-04-14                                  | Himalayan Times (English)                                  | Twenty-six put under quarantine again due to 'negligence of authorities' |
| 2020-04-19                                  | Himalayan Times (English)                                  | Two COVID-19 patients discharged                                         |
| 2020-05-11                                  | Himalayan Times (English)                                  | Two COVID-19 patients discharged from hospital                           |
| 2020-03-18                                  | Himalayan Times (English)                                  | Two COVID-19 suspects admitted to STIDH                                  |
| 2020-05-19                                  | Himalayan Times (English)                                  | Two hospitals sealed after COVID cases                                   |
| 2020-03-05                                  | Online Khabar (Nepali)                                     | Two medical clinics locked due to black market in masks                  |
| 2020-06-14                                  | Himalayan Times (English)                                  | Two more succumb to COVID                                                |
| 2020-04-20                                  | Himalayan Times (English)                                  | Two more labs ready to verify PCR tests                                  |
| 2020-08-17                                  | Himalayan Times (English)                                  | Two more lives lost                                                      |
| 2020-01-26                                  | Online Khabar (Nepali)                                     | Two more Nepalis are suspected of having corona virus                    |

| Date of publication (yyyy/mm/dd) | Name of news media (select from drop-down menu) | Title of news/headline                                                       |
|----------------------------------|-------------------------------------------------|------------------------------------------------------------------------------|
| 2020-06-19                       | Himalayan Times (English)                       | Two more succumb to virus                                                    |
| 2020-05-02                       | Himalayan Times (English)                       | Two more test positive for COVID-19                                          |
| 2020-03-13                       | Himalayan Times (English)                       | Two quarantine centres to be established in Province 1                       |
| 2020-04-23                       | Himalayan Times (English)                       | Two recover                                                                  |
| 2020-05-08                       | Himalayan Times (English)                       | Two test positive for COVID-19 in RDT                                        |
| 2020-08-01                       | Himalayan Times (English)                       | Two-week lockdown in Biratnagar                                              |
| 2020-03-27                       | Kantipur (Nepali)                               | गाउँमा पालना भएन लकडाउन                                                      |
| 2020-06-10                       | Himalayan Times (English)                       | UNDP initiates livelihoods recovery programme                                |
| 2020-04-21                       | Himalayan Times (English)                       | UNFPA hands over 1,200 PPE kits to government                                |
| 2020-07-09                       | Himalayan Times (English)                       | Unilever's initiative                                                        |
| 2020-06-20                       | Himalayan Times (English)                       | Unspent pork barrel fund for COVID-19 fight                                  |
| 2020-06-25                       | Himalayan Times (English)                       | Urgent action needed to safeguard millions of children's future, says UNICEF |
| 2020-03-07                       | Himalayan Times (English)                       | US provides PPE to contain COVID-19                                          |
| 2020-03-26                       | Himalayan Times (English)                       | Utilise lockdown time to test all suspected cases: Thapa                     |
| 2020-05-16                       | Himalayan Times (English)                       | Valley local levels to conduct more tests to control coronavirus             |
| 2020-07-06                       | Himalayan Times (English)                       | Valley witnesses 92 new cases in a week                                      |
| 2020-04-24                       | Himalayan Times (English)                       | Vehicles allowed entry after sanitisation                                    |
| 2020-05-15                       | Himalayan Times (English)                       | Vehicles held for defying lockdown                                           |
| 2020-07-23                       | Himalayan Times (English)                       | Vehicular movement resumes in full swing in Kathmandu valley                 |
| 2020-07-07                       | Himalayan Times (English)                       | Venturing out without wearing mask banned                                    |
| 2020-04-09                       | Kantipur (Nepali)                               | खाडीमा हजारौंको रोजगारी गुम्दै                                               |
| 2020-03-27                       | Kantipur (Nepali)                               | खाद्यवस्तु घरघर पुऱ्याउन गृहको निर्देशन                                      |
| 2020-04-16                       | Kantipur (Nepali)                               | खाने चीज न जाने ठाड                                                          |
| 2020-07-02                       | Himalayan Times (English)                       | Virus claims 45-year-old man                                                 |
| 2020-08-14                       | Himalayan Times (English)                       | Virus kills one                                                              |

| <b>Date of publication<br/>(yyyy/mm/dd)</b> | <b>Name of news media<br/>(select from drop-down menu)</b> | <b>Title of news/headline</b>                                                        |
|---------------------------------------------|------------------------------------------------------------|--------------------------------------------------------------------------------------|
| 2020-08-13                                  | Himalayan Times<br>(English)                               | Virus spreads at community level in Jhapa                                            |
| 2020-03-10                                  | Himalayan Times<br>(English)                               | Visa hurdle for citizens of eight corona-hit countries                               |
| 2020-06-26                                  | Himalayan Times<br>(English)                               | Vitamin A, deworming drug drive on July 6, 7                                         |
| 2020-04-06                                  | Kantipur (Nepali)                                          | खरिपाटी क्वारन्टाइनको प्रशंसा किन हुन्छ ?                                            |
| 2020-06-10                                  | Himalayan Times<br>(English)                               | VTM crunch hits COVID testing                                                        |
| 2020-07-17                                  | Himalayan Times<br>(English)                               | VTM kits donated                                                                     |
| 2020-05-28                                  | Himalayan Times<br>(English)                               | Wage earners hit hard due to prolonged lockdown                                      |
| 2020-08-27                                  | Himalayan Times<br>(English)                               | Ward office sets up 30-bed isolation facility                                        |
| 2020-01-26                                  | Kantipur (Nepali)                                          | Warning to Chinese People                                                            |
| 2020-04-05                                  | Kantipur (Nepali)                                          | wdfwd cfs!ds sf]if                                                                   |
| 2020-03-24                                  | Himalayan Times<br>(English)                               | Week-long nationwide lockdown from today                                             |
| 2020-03-15                                  | Online Khabar (Nepali)                                     | Western Nepal Bus Company will carry passengers only after measuring the temperature |
| 2020-04-30                                  | Himalayan Times<br>(English)                               | WFP sounds food crisis warning                                                       |
| 2020-01-25                                  | Kantipur (Nepali)                                          | What is Novel Corana Virus?                                                          |
| 2020-05-04                                  | Himalayan Times<br>(English)                               | Where returnees prefer cave to quarantine                                            |
| 2020-06-23                                  | Online Khabar (Nepali)                                     | Why PCR kit of 6.5 crore brought by army did not fit in labs?                        |
| 2020-02-10                                  | Online Khabar (Nepali)                                     | Widebody flying china to bring nepali on Falgun 3                                    |
| 2020-07-23                                  | Himalayan Times<br>(English)                               | Willpower needed to defeat COVID-19'                                                 |
| 2020-05-30                                  | Himalayan Times<br>(English)                               | Woman delivers baby in quarantine facility                                           |
| 2020-05-02                                  | Himalayan Times<br>(English)                               | Woman dies in isolation ward of Achham hospital                                      |
| 2020-06-03                                  | Himalayan Times<br>(English)                               | Woman dies in quarantine                                                             |
| 2020-06-04                                  | Himalayan Times<br>(English)                               | Woman quarantined in Dadeldhura dies                                                 |
| 2020-04-27                                  | Himalayan Times<br>(English)                               | Woman tests positive in RDT thrice, dies                                             |
| 2020-07-11                                  | Himalayan Times<br>(English)                               | Woman with COVID-19 delivers baby                                                    |
| 2020-06-18                                  | Himalayan Times<br>(English)                               | Women's quarantine                                                                   |
| 2020-05-01                                  | Kantipur (Nepali)                                          | Work Halt Led Livelihood Stopped                                                     |
| 2020-05-27                                  | Himalayan Times<br>(English)                               | Work in two teams, directs health ministry                                           |

| Date of publication (yyyy/mm/dd) | Name of news media (select from drop-down menu) | Title of news/headline                                                    |
|----------------------------------|-------------------------------------------------|---------------------------------------------------------------------------|
| 2020-04-26                       | Himalayan Times (English)                       | Work to increase isolation ward's capacity under way                      |
| 2020-06-12                       | Himalayan Times (English)                       | World Bank's \$450m road support in Nepal to spur COVID-19 recovery       |
| 2020-03-25                       | Kantipur (Nepali)                               | हामी साथमा छौं : चीन                                                      |
| 2020-06-11                       | Himalayan Times (English)                       | Yangbarak Rural Municipality procures VTM kits for swab test              |
| 2020-06-18                       | Himalayan Times (English)                       | Yet another suicide case tests positive for coronavirus                   |
| 2020-06-05                       | Himalayan Times (English)                       | Yet another unprecedented overnight spike in COVID cases                  |
| 2020-04-09                       | Kantipur (Nepali)                               | थप रणनीति बनाउन चार कार्यदल                                               |
| 2020-08-09                       | Himalayan Times (English)                       | Young woman dies for want of treatment                                    |
| 2020-07-27                       | Himalayan Times (English)                       | Youth activist's fast-unto-death enters ninth day, government indifferent |
| 2020-07-08                       | Himalayan Times (English)                       | Youth activists end hunger strike as govt buckles                         |
| 2020-07-18                       | Himalayan Times (English)                       | Youth found dead in Lamjung quarantine                                    |
| 2020-07-05                       | Himalayan Times (English)                       | Youth kills self after testing positive                                   |
| 2020-05-02                       | Himalayan Times (English)                       | Youth kills self in quarantine                                            |
| 2020-06-06                       | Himalayan Times (English)                       | Youth leaves quarantine with no symptoms, dies at home of COVID!          |
| 2020-06-22                       | Himalayan Times (English)                       | Youth passes current into water tank, woman electrocuted                  |
| 2020-04-26                       | Himalayan Times (English)                       | Youth recovers                                                            |
| 2020-08-21                       | Himalayan Times (English)                       | Youth tests positive for virus after death                                |
| 2020-08-16                       | Himalayan Times (English)                       | Youths ban entry of outsiders                                             |
| 2020-06-14                       | Himalayan Times (English)                       | Youths continue anti-government protest                                   |
| 2020-06-12                       | Himalayan Times (English)                       | Youths protest against government                                         |
| 2020-06-21                       | Himalayan Times (English)                       | Youths take to street against poor handling of COVID-19 yet again         |
| 2020-05-04                       | Kantipur (Nepali)                               | अग्रपंक्तिमा खटिनेले पाएनन् भत्ता                                         |
| 2020-07-08                       | Kantipur (Nepali)                               | अझै बनेन कोभिड अस्पताल                                                    |
| 2020-04-28                       | Kantipur (Nepali)                               | अत्यावश्यक बाहेकलाई उपत्यका छिर्न नदिनु : गृह                             |
| 2020-03-21                       | Kantipur (Nepali)                               | अत्यावश्यकबाहेकका सेवा चैत २१ सम्म बन्द                                   |
| 2020-05-31                       | Kantipur (Nepali)                               | अधिकांश संक्रमितमा लक्षण छैन                                              |
| 2020-03-13                       | Kantipur (Nepali)                               | अनअराइभल भिसा वैशाख १८ सम्म बन्द                                          |

| Date of publication (yyyy/mm/dd) | Name of news media (select from drop-down menu) | Title of news/headline                              |
|----------------------------------|-------------------------------------------------|-----------------------------------------------------|
| 2020-07-07                       | Kantipur (Nepali)                               | अनलाइन कक्षा बन्द गर्ने विद्यालयको चेतावनी          |
| 2020-07-19                       | Online Khabar (Nepali)                          | अनलाइन कक्षा सञ्चालन गर्न शिक्षा मन्त्रालयको अनुरोध |
| 2020-08-28                       | Online Khabar (Nepali)                          | अनलाइन डेलिभरीमा सीडीओको नीति वुहानको भन्दा कडा !   |
| 2020-06-03                       | Kantipur (Nepali)                               | अनुमति दिन आलटाल                                    |
| 2020-06-22                       | Kantipur (Nepali)                               | अनुमतिबिना उपत्यका पस्नेलाई नाकाबाटै फिर्ता         |
| 2020-03-03                       | Kantipur (Nepali)                               | अन्तर्राष्ट्रिय आवागमनमा कडाइ                       |
| 2020-06-04                       | Kantipur (Nepali)                               | अन्य रोग भए कोरोनाबाट मृत्यु नमानिने                |
| 2020-06-10                       | Kantipur (Nepali)                               | अपांगता भएकाहरू ओझेलमा                              |
| 2020-08-16                       | Kantipur (Nepali)                               | अपांगता भएकाहरूलाई झन् गाह्रो                       |
| 2020-08-04                       | Online Khabar (Nepali)                          | अब थप सचेत हुने बेला आएको छ : मुख्यमन्त्री भट्ट     |
| 2020-03-10                       | Kantipur (Nepali)                               | अब दैनिक १० हजार मास्क उत्पादन                      |
| 2020-08-11                       | Online Khabar (Nepali)                          | अब रेस्टुरेन्टमा बसेर खान नपाइने                    |
| 2020-06-03                       | Kantipur (Nepali)                               | अब लकडाउन थप सक्दैनौं : व्यवसायी                    |
| 2020-08-21                       | Online Khabar (Nepali)                          | अब लक्षण भएका संक्रमितलाई मात्र अस्पताल भर्ना गरिने |
| 2020-06-01                       | Kantipur (Nepali)                               | अब सौत्रैपछि लकडाउनको विकल्प                        |
| 2020-03-07                       | Kantipur (Nepali)                               | अमेरिकी सरकारले दियो उपकरण                          |
| 2020-08-31                       | Kantipur (Nepali)                               | अर्को सातादेखि समुदायमा एन्टिबडी परीक्षण            |
| 2020-06-17                       | Online Khabar (Nepali)                          | अर्घाखाँचीको कारेन्टिनामा एक पुरुषले गरे आत्महत्या  |
| 2020-05-18                       | Kantipur (Nepali)                               | अर्थतन्त्र उकास्न तीनखुट्टे रणनीति                  |
| 2020-05-22                       | Kantipur (Nepali)                               | अर्थतन्त्र उकास्न रोजगारी र राहत'                   |
| 2020-05-15                       | Kantipur (Nepali)                               | अर्थतन्त्र जोगाउन पर्याप्त राहत'                    |
| 2020-05-16                       | Kantipur (Nepali)                               | अव्यवस्थित कारेन्टाइनले संक्रमण : विज्ञ             |
| 2020-07-19                       | Kantipur (Nepali)                               | असमानतालाई महामारीले प्रस्ट देखायो'                 |
| 2020-05-24                       | Kantipur (Nepali)                               | असाधारण अवस्थामा असामान्य बजेटको अपेक्षा            |
| 2020-06-10                       | Kantipur (Nepali)                               | अस्ट्रेलियाबाट ११ आए                                |
| 2020-06-24                       | Kantipur (Nepali)                               | अस्ट्रेलियाबाट उडे २५९ नेपाली                       |
| 2020-03-19                       | Kantipur (Nepali)                               | अस्पताल प्रवेशअघि 'थर्मल गन'                        |
| 2020-05-17                       | Kantipur (Nepali)                               | अस्पताल र स्वास्थ्यकर्मीबाट पनि संक्रमणको जोखिम     |
| 2020-07-12                       | Kantipur (Nepali)                               | अस्पताल सिल गर्नु पर्दैन'                           |
| 3/22/20202                       | Kantipur (Nepali)                               | अस्पतालका ओपीडी खुलै                                |
| 2020-07-11                       | Kantipur (Nepali)                               | अस्पतालको व्यवस्थापन हाम्रो होइन'                   |
| 2020-02-04                       | Kantipur (Nepali)                               | अस्पतालमा छैनन् सुरक्षा सामग्री                     |
| 2020-08-12                       | Online Khabar (Nepali)                          | अस्पतालमा मृत्यु भएका धादिङका युवकमा कोरोना पुष्टि  |
| 2020-08-12                       | Kantipur (Nepali)                               | अस्पतालमा शय्या अभाव                                |
| 2020-03-20                       | Kantipur (Nepali)                               | अस्पतालमै छैन ज्वरो क्लिनिक                         |
| 2020-03-13                       | Kantipur (Nepali)                               | अस्पतालमै बन्छ स्यानिटाइजर                          |
| 2020-05-25                       | Online Khabar (Nepali)                          | अस्पतालमै मनाए कोरोना संक्रमितले ईद                 |
| 2020-04-18                       | Online Khabar (Nepali)                          | अस्पताललाई कोभिड-१९ स्क्रिनिङ बुथ हस्तान्तरण        |
| 2020-08-14                       | Kantipur (Nepali)                               | अस्पताललाई युद्धस्तरमा सुधारौं                      |
| 2020-05-25                       | Kantipur (Nepali)                               | अस्पतालहरूको दायित्व                                |
| 2020-08-19                       | Kantipur (Nepali)                               | अस्पतालहरूमा संक्रमित अटाउनै मुस्किल                |
| 2020-08-26                       | Kantipur (Nepali)                               | अस्वाभाविक मूल्यवृद्धिले सास्ती                     |
| 2020-05-23                       | Kantipur (Nepali)                               | अहिलेसम्म ७० निको भए                                |

| Date of publication (yyyy/mm/dd) | Name of news media (select from drop-down menu) | Title of news/headline                                                     |
|----------------------------------|-------------------------------------------------|----------------------------------------------------------------------------|
| 2020-06-06                       | Kantipur (Nepali)                               | आइपुगे १९४ जना                                                             |
| 2020-05-14                       | Kantipur (Nepali)                               | आइसोलेसन नहुँदा पर्साका संक्रमित घरमै                                      |
| 2020-08-23                       | Online Khabar (Nepali)                          | आइसोलेसन बढाउन नेकपा रुपन्देहीको माग                                       |
| 2020-08-13                       | Online Khabar (Nepali)                          | आइसोलेसन बनाउन प्रदेश १ सरकारबाट १ करोड ६० लाख निकास                       |
| 2020-03-13                       | Kantipur (Nepali)                               | आइसोलेसन बेड थपियो                                                         |
| 2020-03-17                       | Kantipur (Nepali)                               | आइसोलेसन बेड राख्न निर्देशन                                                |
| 2020-06-02                       | Kantipur (Nepali)                               | आइसोलेसन र कारेन्टाइन भद्रगोल                                              |
| 2020-02-06                       | Kantipur (Nepali)                               | आइसोलेसन सेन्टरबारे सरकार अनिर्णीत                                         |
| 2020-05-25                       | Kantipur (Nepali)                               | आइसोलेसनको ढोका फोडेर संक्रमित फरार                                        |
| 2020-03-06                       | Kantipur (Nepali)                               | आइसोलेसनको सुरक्षामा प्रहरी                                                |
| 2020-06-27                       | Kantipur (Nepali)                               | आइसोलेसनबाट भागेपछि सबै छाडिए                                              |
| 2020-06-03                       | Kantipur (Nepali)                               | आइसोलेसनमा जाने डराउँछन् स्वास्थ्यकर्मी                                    |
| 2020-08-14                       | Kantipur (Nepali)                               | आइसोलेसनमा बस्ने कर्मचारीको खर्च बैंकको                                    |
| 2020-03-17                       | Kantipur (Nepali)                               | आइसोलेसनमा व्यक्तिको घर                                                    |
| 2020-07-31                       | Kantipur (Nepali)                               | आईसीयू जाने बिरामीको संख्या बढ्दो                                          |
| 2020-08-21                       | Kantipur (Nepali)                               | आईसीयू र भन्टिलेटर थप्दै छौं : प्रवक्ता गौतम                               |
| 2020-08-18                       | Kantipur (Nepali)                               | आईसीयूमा राख्नुपर्ने संक्रमितमध्ये ३ प्रतिशतसम्मको मृत्यु हुन सक्ने        |
| 2020-07-10                       | Kantipur (Nepali)                               | आतंकित होइन, संयमित बनेौं                                                  |
| 2020-05-04                       | Kantipur (Nepali)                               | आत्मनिर्भर अर्थतन्त्र निर्माणको अवसर                                       |
| 2020-06-29                       | Kantipur (Nepali)                               | आत्महत्या बढेर दिनहुँ १९                                                   |
| 2020-06-28                       | Kantipur (Nepali)                               | आन्तरिक उडान कहिले खुल्छ?                                                  |
| 2020-06-20                       | Kantipur (Nepali)                               | आफैं किट किन्दै, परीक्षण गर्दै                                             |
| 2020-07-12                       | Kantipur (Nepali)                               | आम बेरोजगारीले निम्त्याउने राष्ट्रिय संकट                                  |
| 2020-06-25                       | Kantipur (Nepali)                               | आयात खुम्चिँदा विदेशी मुद्रा सञ्चिति बढ्यो                                 |
| 2020-06-14                       | Kantipur (Nepali)                               | आयोजनाले पाउन थाले निर्माण सामग्री                                         |
| 2020-06-28                       | Kantipur (Nepali)                               | आरडीटी गर्दै घर पठाउँदै                                                    |
| 2020-04-24                       | Kantipur (Nepali)                               | 'आरडीटी पोजिटिभ र पीसीआर नेगेटिभ आए पनि पुनः परीक्षण'                      |
| 2020-05-14                       | Online Khabar (Nepali)                          | आरडीटीमा सरकारको नीति : टेस्ट संख्या जोड्ने, पोजेटिभ गन्दै नगर्ने          |
| 2020-04-16                       | Online Khabar (Nepali)                          | आरुघाटका युवकको परिवार र छिमेकीमा पनि कोरोना संक्रमण परीक्षण गरिने         |
| 2020-06-11                       | Kantipur (Nepali)                               | आर्थिक क्षेत्र चलायमान बनाउन कांग्रेसको माग                                |
| 2020-05-15                       | Kantipur (Nepali)                               | आर्थिक वृद्धिदर १५ हुने प्रक्षेपण                                          |
| 2020-05-25                       | Kantipur (Nepali)                               | आर्थिक शैथिल्यमा कोरोना मात्र दोषी छैन                                     |
| 2020-03-20                       | Kantipur (Nepali)                               | आवश्यक परे 'लकडाउन' गर्न मोडालिटी बनाइँदै                                  |
| 2020-06-29                       | Kantipur (Nepali)                               | आवेगले धेरै आत्महत्या                                                      |
| 2020-08-22                       | Online Khabar (Nepali)                          | आशारामलाई कोभिड अस्पताल बनाउन खोज्दा स्थानीयको विरोध                       |
| 2020-08-01                       | Kantipur (Nepali)                               | आश्रयस्थलबाट पनि निकालिन थाले कामदार                                       |
| 2020-04-16                       | Online Khabar (Nepali)                          | इटालीबाट आएका महिलामा एन्टिबडी पोजेटिभ, टेस्ट गर्ने डाक्टर नै कारेन्टाइनमा |
| 2020-08-04                       | Kantipur (Nepali)                               | ई: अस्पताल भर्ना                                                           |
| 2020-07-06                       | Kantipur (Nepali)                               | ईटा उद्योगमा २४ हजार लाई रोजरी                                             |
| 2020-07-31                       | Online Khabar (Nepali)                          | उच्च अदालतको आदेश : प्रदेश २ मा भारतबाट प्रवेशमा कडाइ गर्नु                |

| Date of publication (yyyy/mm/dd) | Name of news media (select from drop-down menu) | Title of news/headline                                             |
|----------------------------------|-------------------------------------------------|--------------------------------------------------------------------|
| 2020-08-28                       | Kantipur (Nepali)                               | उच्च जोखिममा कैदीबन्दी                                             |
| 2020-03-01                       | Kantipur (Nepali)                               | उच्चस्तरीय समन्वय समिति गठन                                        |
| 2020-06-12                       | Kantipur (Nepali)                               | उडान पर्खदै ईपीएस कामदार                                           |
| 2020-05-01                       | Online Khabar (Nepali)                          | उदयपुरका बिरामी अस्पतालबाट फेरि निकालिए                            |
| 2020-04-23                       | Online Khabar (Nepali)                          | उदयपुरमै कोरोना परीक्षण गर्न माग                                   |
| 2020-05-20                       | Kantipur (Nepali)                               | उद्धार गर्न ३ महिना लाग्ने                                         |
| 2020-07-13                       | Kantipur (Nepali)                               | उद्धारका लागि थप उडान                                              |
| 2020-05-19                       | Kantipur (Nepali)                               | उद्यम चलाउन उद्योग र वाणिज्यको पास                                 |
| 2020-05-15                       | Kantipur (Nepali)                               | उद्योग र आयोजना सञ्चालन पुनः अन्यालमा                              |
| 2020-06-08                       | Kantipur (Nepali)                               | उद्योगलाई कामदारकै पिरलो                                           |
| 2020-05-30                       | Kantipur (Nepali)                               | उद्योगलाई प्रोत्साहन                                               |
| 2020-06-04                       | Kantipur (Nepali)                               | उद्योगीको विरोधपछि कर तिर्ने अवधि थपियो                            |
| 2020-05-04                       | Kantipur (Nepali)                               | उद्योगीले मागे संरक्षण प्याकेज                                     |
| 2020-08-18                       | Kantipur (Nepali)                               | उपचार नपाइने भो                                                    |
| 2020-08-09                       | Online Khabar (Nepali)                          | उपचार नपाएर मर्ने क्रम बढेको भन्दै वीरगञ्जमा प्रदर्शन              |
| 2020-05-12                       | Kantipur (Nepali)                               | उपचारमा आयुर्वेदिक औषधि !                                          |
| 2020-03-17                       | Kantipur (Nepali)                               | उपचारमा खट्दा संक्रमण भए १० लाख                                    |
| 2020-05-14                       | Kantipur (Nepali)                               | उपत्यका छिर्नेको मात्र परीक्षण !                                   |
| 2020-07-31                       | Kantipur (Nepali)                               | उपत्यका छिर्नेलाई निगरानी छैन                                      |
| 2020-07-01                       | Online Khabar (Nepali)                          | उपत्यका प्रवेश गर्ने नाकाबाट झण्डै ४ सय गाडी फर्काइयो              |
| 2020-06-15                       | Kantipur (Nepali)                               | उपत्यका प्रवेशमा तीन पक्षको स्वीकृति अनिवार्य                      |
| 2020-05-14                       | Online Khabar (Nepali)                          | उपत्यका फर्किनेलाई आफ्नै कोठामा प्रवेश निषेध !                     |
| 2020-05-08                       | Kantipur (Nepali)                               | उपत्यका भित्रिँदै छन् दिनमा पाँच हजार                              |
| 2020-07-08                       | Kantipur (Nepali)                               | उपत्यका समुदाय संक्रमणको संघारमा'                                  |
| 2020-05-26                       | Kantipur (Nepali)                               | उपत्यकाका नाकामा 'डेडिकेटेड टिम' कहिले ?                           |
| 2020-06-16                       | Kantipur (Nepali)                               | उपत्यकाका सपिङ मल खुले                                             |
| 2020-08-17                       | Online Khabar (Nepali)                          | उपत्यकामा कोरोना संक्रमितलाई अस्पताल पुर्याउनेहरु                  |
| 2020-08-23                       | Online Khabar (Nepali)                          | उपत्यकामा खाद्यान्न र तरकारी पसल बिहान ९ बजेसम्म मात्र खोल्न पाइने |
| 2020-06-23                       | Kantipur (Nepali)                               | उपत्यकामै घट्यो परीक्षण                                            |
| 2020-06-23                       | Kantipur (Nepali)                               | उपत्यकालाई जोगाऔं                                                  |
| 2020-04-06                       | Online Khabar (Nepali)                          | ऊर्जामन्त्री पुनले रोल्पा पठाए पीपीईसहित स्वास्थ्य सामग्री         |
| 2020-07-09                       | Kantipur (Nepali)                               | ऋणको भुक्तानी म्याद बढाउन माग                                      |
| 2020-07-05                       | Kantipur (Nepali)                               | ऋणपत्र निष्कासन गर्न बैंकहरूलाई थप समय                             |
| 2020-07-07                       | Online Khabar (Nepali)                          | एक घर, एक पीसीआर टेस्टको माग गर्दै गण्डकी प्रदेशमा संकल्प प्रस्ताव |
| 2020-05-17                       | Kantipur (Nepali)                               | एक प्रतिशत बिन्दुले गरिबी बढ्ने                                    |
| 2020-04-10                       | Online Khabar (Nepali)                          | एक महिनामा झण्डै ३५ करोडको स्वास्थ्य सामग्री आयात                  |
| 2020-05-26                       | Kantipur (Nepali)                               | एक महिनामा झन्डै ५० हजार भित्रिए                                   |
| 2020-05-24                       | Kantipur (Nepali)                               | एक महिनामा डेढ लाखले गरे कोरोना बिमा                               |
| 2020-04-26                       | Kantipur (Nepali)                               | एक साता थप सिफारिस                                                 |
| 2020-08-13                       | Kantipur (Nepali)                               | एक सातादेखि संक्रमित कोठामै                                        |
| 2020-05-03                       | Kantipur (Nepali)                               | एक सातामा थप १७ हजारले गरे कोरोना बिमा                             |
| 2020-08-25                       | Kantipur (Nepali)                               | एकका लागि एक' अभियानबाट पीसीआर प्रयोगशाला                          |



| Date of publication (yyyy/mm/dd) | Name of news media (select from drop-down menu) | Title of news/headline                                       |
|----------------------------------|-------------------------------------------------|--------------------------------------------------------------|
| 2020-08-12                       | Online Khabar (Nepali)                          | एकजना कोरोना संक्रमित भेटिएपछि इच्छाकामना गाउँपालिका सिल     |
| 2020-07-14                       | Kantipur (Nepali)                               | एकै दिन १,७०५ जना निको भए                                    |
| 2020-05-10                       | Online Khabar (Nepali)                          | एकै दिन १३ सय जनाको पीसीआर परीक्षण                           |
| 2020-06-20                       | Kantipur (Nepali)                               | एकै दिन ४९४ जना फर्किए                                       |
| 2020-03-18                       | Kantipur (Nepali)                               | एक्स्पो सेन्टरलाई कोरोना उपचार केन्द्र बनाइँदै               |
| 2020-08-18                       | Online Khabar (Nepali)                          | एटीएमबाट पैसा झिकेपछि स्यानिटाइजर अनिवार्य                   |
| 2020-05-28                       | Kantipur (Nepali)                               | एडीबीको २५ करोड डलर सहायता स्वीकृत                           |
| 2020-07-04                       | Kantipur (Nepali)                               | एडीबीको ३० लाख डलर अनुदान                                    |
| 2020-05-15                       | Kantipur (Nepali)                               | एनआईसीको १०५ ब्याज छुट                                       |
| 2020-08-28                       | Kantipur (Nepali)                               | एनबी बैंकले दियो ५ हजार थान रेमडेसिभर                        |
| 2020-05-10                       | Kantipur (Nepali)                               | एनबीआईले दियो ३० लाखको पीपीई                                 |
| 2020-05-11                       | Kantipur (Nepali)                               | एभरेस्टका कर्मचारीले दिए ३० लाखको राहत                       |
| 2020-08-30                       | Kantipur (Nepali)                               | एभरेस्टका ग्राहकलाई पीसीआरमा छुट                             |
| 2020-06-05                       | Kantipur (Nepali)                               | एयरपोर्टबाट सीधै होल्डिङ सेन्टर                              |
| 2020-08-31                       | Kantipur (Nepali)                               | एयर-फिल्टर मास्क नलगाऔं                                      |
| 2020-06-09                       | Kantipur (Nepali)                               | एयरलाइन्स विवाद नमिल्दा विदेशबाट उद्धारमा ढिलाइ              |
| 2020-03-15                       | Kantipur (Nepali)                               | एसईई केन्द्रमा हेल्थ डेस्क                                   |
| 2020-05-11                       | Kantipur (Nepali)                               | एसईई हुन्छ, तयारीमै रहनुहोस् : शिक्षा मन्त्रालय              |
| 2020-03-19                       | Kantipur (Nepali)                               | एसईईसहित सबै परीक्षा स्थगित                                  |
| 2020-05-06                       | Kantipur (Nepali)                               | एसबीआईको १ करोड सहयोग                                        |
| 2020-05-03                       | Kantipur (Nepali)                               | एस्कर्टिङ' मा स्याउ र लसुनका कन्टेनर                         |
| 2020-07-17                       | Kantipur (Nepali)                               | ओपीडी खुले, बिरामी घटे                                       |
| 2020-05-28                       | Kantipur (Nepali)                               | ओपीडीबाटै संक्रमण सरे के गर्ने?                              |
| 2020-06-16                       | Kantipur (Nepali)                               | ओमानबाट १६६ जना स्वदेश फिर्ता                                |
| 2020-06-23                       | Kantipur (Nepali)                               | ओम्रीले ल्याएका पीसीआर काम नलाग्ने                           |
| 2020-06-17                       | Kantipur (Nepali)                               | औषधि नै नखाई ७४ लाखको बिल                                    |
| 2020-06-17                       | Kantipur (Nepali)                               | कक्षा १० र ११ का परीक्षा                                     |
| 2020-04-29                       | Kantipur (Nepali)                               | कक्षा १०-१२ को परीक्षा सञ्चालन गर्न तीन विकल्प               |
| 2020-07-06                       | Kantipur (Nepali)                               | कक्षा ११ को बोर्ड परीक्षा नहुने                              |
| 2020-03-23                       | Kantipur (Nepali)                               | कञ्चनपुरमा 'कप्पु'                                           |
| 2020-07-11                       | Kantipur (Nepali)                               | कतारबाट सिधै कारेन्टाइनमा                                    |
| 2020-04-29                       | Kantipur (Nepali)                               | 'कन्ट्याक्ट ट्रेसिङ' धेरै गाह्रो रहेछ                        |
| 2020-05-05                       | Kantipur (Nepali)                               | कन्ट्याक्ट ट्रेसिङ र परीक्षणबारे अन्याोल                     |
| 2020-05-18                       | Online Khabar (Nepali)                          | कपिलवस्तु जिल्ला जेठ २० गतेसम्म सिल                          |
| 2020-08-06                       | Online Khabar (Nepali)                          | कपिलवस्तुमा साउन ३२ गतेसम्म अत्यावश्यक बाहेकका सबै सेवा बन्द |
| 2020-05-12                       | Online Khabar (Nepali)                          | कपिलवस्तुलाई जेठ ५ सम्म सिल गर्ने निर्णय                     |
| 2020-08-03                       | Kantipur (Nepali)                               | कम खर्चिलो भएकाले उपयुक्त'                                   |
| 2020-06-23                       | Kantipur (Nepali)                               | कमजोर निर्णयले शिक्षा पछाडि                                  |
| 2020-08-10                       | Kantipur (Nepali)                               | कमजोर पूर्वतयारीले महामारी तीव्र                             |
| 2020-02-10                       | Kantipur (Nepali)                               | कम्तीमा ७२ घण्टा चाहिन्छ : चीन                               |
| 2020-06-04                       | Kantipur (Nepali)                               | कर कसरी तिर्ने?                                              |
| 2020-06-07                       | Kantipur (Nepali)                               | कर तिर्न सकिन्न                                              |
| 2020-08-16                       | Kantipur (Nepali)                               | करिब २० प्रतिशतमा लक्षण                                      |

| Date of publication (yyyy/mm/dd) | Name of news media (select from drop-down menu) | Title of news/headline                                                                 |
|----------------------------------|-------------------------------------------------|----------------------------------------------------------------------------------------|
| 2020-05-14                       | Kantipur (Nepali)                               | कर्जा असुलीमा अबको जोखिम                                                               |
| 2020-05-05                       | Kantipur (Nepali)                               | कर्णाली प्रदेश एक साता सिल                                                             |
| 2020-06-18                       | Online Khabar (Nepali)                          | कर्णालीमा कांग्रेसको प्रस्ताव : सरकारी पदाधिकारीको गाडी कोरोना नियन्त्रणमा प्रयोग गरौं |
| 2020-04-07                       | Online Khabar (Nepali)                          | कर्णालीमा कोरोनाको जोखिम : लकडाउनले नपुग्ने भन्दै कोरियन मोडेलको खोजी                  |
| 2020-05-17                       | Kantipur (Nepali)                               | कर्णालीमा खेती अभियान सुरु                                                             |
| 2020-08-14                       | Online Khabar (Nepali)                          | कर्णालीमा प्रवेश गर्न पीसीआर अनिवार्य, होटल रेस्टुरेन्ट बन्द                           |
| 2020-07-17                       | Kantipur (Nepali)                               | कर्णालीमा मेसिन धेरै, परीक्षण थोरै                                                     |
| 2020-03-20                       | Online Khabar (Nepali)                          | कर्णालीमा हजार बेडको कारेन्टाइन, नाकाबाट नेपालीलाई मात्रै प्रवेश                       |
| 2020-06-22                       | Kantipur (Nepali)                               | कर्मचारी कटौतीको तयारी                                                                 |
| 2020-05-05                       | Kantipur (Nepali)                               | कर्मचारी भर्ना बन्द                                                                    |
| 2020-05-29                       | Kantipur (Nepali)                               | कर्मचारीको भत्ता कटौती                                                                 |
| 2020-08-16                       | Online Khabar (Nepali)                          | कर्मचारीमा कोरोना देखिएपछि बुटवल उपमहानगरमा अत्यावश्यकबाहेकका सेवा बन्द                |
| 2020-07-30                       | Online Khabar (Nepali)                          | कर्मचारीमा कोरोना संक्रमण देखिएपछि जलेश्वर नगरपालिका बन्द                              |
| 2020-05-25                       | Kantipur (Nepali)                               | कर्मचारीलाई ५० प्रतिशत तलब देऊ'                                                        |
| 2020-06-15                       | Kantipur (Nepali)                               | कस्तो आउँदै छ प्रदेश बजेट ?                                                            |
| 2020-05-11                       | Kantipur (Nepali)                               | कस्तो छ डिजिटल पूर्वाधार?                                                              |
| 2020-06-09                       | Kantipur (Nepali)                               | कहाँ चुक्यो सरकार?                                                                     |
| 2020-08-09                       | Kantipur (Nepali)                               | कहिले हुन्छ दिनहुँ १० हजार परीक्षण?                                                    |
| 2020-07-07                       | Kantipur (Nepali)                               | कांग्रेस महाधिवेशन फागुन ७-१० मै                                                       |
| 2020-03-03                       | Kantipur (Nepali)                               | कांग्रेसको १४ बुँदे अपिल                                                               |
| 2020-08-19                       | Online Khabar (Nepali)                          | काठमाडौँ उपत्यकामा बुधबार मध्यरातदेखि निषेधाज्ञा                                       |
| 2020-08-14                       | Online Khabar (Nepali)                          | काठमाडौँ उपत्यकामा भेला, प्रदर्शन र जात्रा सञ्चालनमा रोक                               |
| 2020-07-18                       | Kantipur (Nepali)                               | काठमाडौँ कारेन्टाइन                                                                    |
| 2020-07-30                       | Online Khabar (Nepali)                          | काठमाडौँ प्रवेश गर्ने नाकामा स्वाब दिएकामध्ये २४ जनामा कोरोना पुष्टि                   |
| 2020-08-14                       | Kantipur (Nepali)                               | काठमाडौँ भित्रिने राजमार्गमा कडाई                                                      |
| 2020-08-13                       | Online Khabar (Nepali)                          | काठमाडौँ महानगर वडा नम्बर १४ मा फलफूल तथा तरकारी पसल चार घण्टा मात्र खोल्न पाइने       |
| 2020-06-21                       | Kantipur (Nepali)                               | काठमाडौँ संक्रमणको जोखिममा                                                             |
| 2020-08-16                       | Online Khabar (Nepali)                          | काठमाडौँ-१० मा फुटपाथ पसल र चियापसल बन्द                                               |
| 2020-08-12                       | Online Khabar (Nepali)                          | काठमाडौँका पसलहरुमा अपनाईदेन सावधानी                                                   |
| 2020-08-07                       | Online Khabar (Nepali)                          | काठमाडौँका सार्वजनिक यातायातमा छैन सुरक्षा सावधानी                                     |
| 2020-08-08                       | Online Khabar (Nepali)                          | काठमाडौँको गहनापोखरी-हाँडीगाउँ क्षेत्र सिल                                             |
| 2020-05-15                       | Online Khabar (Nepali)                          | काठमाडौँको चन्द्रागिरि नगरपालिका 'सिल'                                                 |
| 2020-04-17                       | Online Khabar (Nepali)                          | काठमाडौँबाट ३३ चिकित्सकको टोली सुदूरपश्चिम पुग्यो                                      |
| 2020-05-06                       | Kantipur (Nepali)                               | काठमाडौँमा कति जनाको भयो कोरोना परीक्षण?                                               |
| 2020-08-26                       | Online Khabar (Nepali)                          | काठमाडौँमा कौसीमै नाचियो गौरा (फोटो फिचर)                                              |
| 2020-05-21                       | Kantipur (Nepali)                               | काठमाडौँमा छैन कारेन्टाइन                                                              |
| 2020-08-22                       | Online Khabar (Nepali)                          | काठमाडौँमा संक्रमितको संख्या बढेपछि...                                                 |
| 2020-08-18                       | Kantipur (Nepali)                               | काठमाडौँलाई जोगाऊ                                                                      |
| 2020-08-21                       | Online Khabar (Nepali)                          | काभ्रेमा सार्वजनिक यातायात बन्द                                                        |
| 2020-05-30                       | Kantipur (Nepali)                               | कामदार ल्याउन नेपाललाई खर्च नलाग्ने                                                    |
| 2020-03-19                       | Kantipur (Nepali)                               | कामदारलाई छुट्टी दिँदै होटल                                                            |

| Date of publication (yyyy/mm/dd) | Name of news media (select from drop-down menu) | Title of news/headline                                                  |
|----------------------------------|-------------------------------------------------|-------------------------------------------------------------------------|
| 2020-08-16                       | Kantipur (Nepali)                               | कामदारलाई स्वदेश फर्काउने प्रक्रिया सुस्त                               |
| 2020-08-30                       | Kantipur (Nepali)                               | कामनाको पनि छुट योजना                                                   |
| 2020-08-24                       | Online Khabar (Nepali)                          | काममा नजाने वीरगञ्जका निजी अस्पतालका डाक्टरको निर्णय                    |
| 2020-03-20                       | Kantipur (Nepali)                               | कारागारमा उच्च जोखिम                                                    |
| 2020-03-17                       | Kantipur (Nepali)                               | कार्यान्वयन फितलो                                                       |
| 2020-06-17                       | Kantipur (Nepali)                               | कार्यान्वयनको कसीमा प्रदेश बजेट                                         |
| 2020-04-07                       | Online Khabar (Nepali)                          | कालिकोटबाट 'श्रोत स्वाब' लिएर फर्किए मन्त्री                            |
| 2020-05-20                       | Online Khabar (Nepali)                          | कालीमाटीका सुरक्षाकर्मीमा संक्रमण देखिएपछि प्रहरीका ६ इकाइ सिल          |
| 2020-05-11                       | Kantipur (Nepali)                               | कालोबजारी आरोपमा दुई पक्राउ                                             |
| 2020-03-06                       | Kantipur (Nepali)                               | कालोबजारीविरुद्ध खबरदारी गर्ने                                          |
| 2020-05-03                       | Online Khabar (Nepali)                          | किट अभावले जुम्लामा सुरु भएन कोरोना परीक्षण                             |
| 2020-05-03                       | Online Khabar (Nepali)                          | किट अभावले भैरहवामा कोरोना परीक्षण रोकियो                               |
| 2020-06-13                       | Kantipur (Nepali)                               | किन उत्रिए युवा सडकमा ?                                                 |
| 2020-07-07                       | Kantipur (Nepali)                               | किसानलाई १० करोड राहत दिइँदै                                            |
| 2020-07-14                       | Kantipur (Nepali)                               | किस्ताको दबाबले व्यवसायी आन्दोलित                                       |
| 2020-08-01                       | Kantipur (Nepali)                               | कीर्तिपुर मैदानमै आवासीय सुविधा, बाहिर जान र आउन बन्देज                 |
| 2020-06-11                       | Kantipur (Nepali)                               | कुखुराको मासु अभाव                                                      |
| 2020-06-29                       | Kantipur (Nepali)                               | कुन चरणमा पुग्यो कोरोना संक्रमण?                                        |
| 2020-06-18                       | Kantipur (Nepali)                               | कुवेतमा ५३ दिनदेखि जहाज कुद्दै २३९३ नेपाली                              |
| 2020-03-17                       | Kantipur (Nepali)                               | कूटनीतिक ब्रिफिङ                                                        |
| 2020-05-11                       | Kantipur (Nepali)                               | कूटनीतिक वार्ता कहिले ?                                                 |
| 2020-06-23                       | Kantipur (Nepali)                               | कृषकलाई होइन, 'प्रपोजल' लाई अनुदान !                                    |
| 2020-05-13                       | Kantipur (Nepali)                               | कृषि उत्पादन बढाऊ'                                                      |
| 2020-06-15                       | Kantipur (Nepali)                               | केएमजीका सबै कर्मचारीको कोरोना बिमा                                     |
| 2020-06-03                       | Online Khabar (Nepali)                          | केएमसी अस्पतालको आकस्मिकसहित सबै सेवा बन्द                              |
| 2020-04-05                       | Online Khabar (Nepali)                          | कैलाली, कञ्चनपुर र बागलुङमा क-कसको हुने भयो कोरोना परीक्षण ?            |
| 2020-04-21                       | Online Khabar (Nepali)                          | कैलालीका एक युवकमा कोरोना एन्टिबडी पोजेटिभ                              |
| 2020-05-30                       | Online Khabar (Nepali)                          | कैलालीका सात स्थानीय तह मिलेर कोरोना अस्पताल सञ्चालन गर्दै              |
| 2020-05-21                       | Online Khabar (Nepali)                          | कैलालीमा भारतीय भूमिबाट साढे ८ सय नेपालीको उद्धार                       |
| 2020-08-10                       | Online Khabar (Nepali)                          | कोटेश्वरका थप ४ जनालाई कोरोना संक्रमण                                   |
| 2020-08-10                       | Online Khabar (Nepali)                          | कोटेश्वरको 'कोरोना संक्रमित क्षेत्र'मा चिहाउँदा...                      |
| 2020-07-30                       | Online Khabar (Nepali)                          | कोभिड १९ उपचार गरेबापत निजी अस्पतालले १५ हजारसम्म शुल्क लिन पाउने       |
| 2020-08-14                       | Online Khabar (Nepali)                          | कोभिड १९ का बिरामीको उपचारका लागि जनमैत्री अस्पताल सञ्चालनमा ल्याउन माग |
| 2020-08-17                       | Online Khabar (Nepali)                          | कोभिड कोषमा बेलायतबाट व्यवसायी लामिछानेको १५ लाख सहयोग                  |
| 2020-07-30                       | Online Khabar (Nepali)                          | कोभिड नियन्त्रणमा नखटिने २५ स्वास्थ्यकर्मी पक्राउ                       |
| 2020-06-14                       | Kantipur (Nepali)                               | कोभिड-१९ : चुनौती र सम्भावना सँगसँगै                                    |
| 2020-03-24                       | Online Khabar (Nepali)                          | कोभिड-१९ : हालसम्म नेपालमा ६१० नमूना परीक्षण, दुईमा संक्रमण             |
| 2020-07-08                       | Kantipur (Nepali)                               | कोभिड-१९ को पर्भाव र नेपाली किर्केट                                     |
| 2020-06-07                       | Kantipur (Nepali)                               | कोभिड-१९ पछि विद्यालय शिक्षा कसरी?                                      |
| 2020-06-04                       | Kantipur (Nepali)                               | कोभिड-१९ पछिको सहरी विकास                                               |
| 2020-06-12                       | Kantipur (Nepali)                               | कोभिड-१९ बाट आँखाको सुरक्षा                                             |
| 2020-04-24                       | Kantipur (Nepali)                               | कोभिड-१९ विरुद्ध सरकार कति सफल?                                         |

| Date of publication (yyyy/mm/dd) | Name of news media (select from drop-down menu) | Title of news/headline                                                       |
|----------------------------------|-------------------------------------------------|------------------------------------------------------------------------------|
| 2020-08-30                       | Kantipur (Nepali)                               | कोभिडका कारण आम्दानी गुमाउँदै टेलिकम क्षेत्र                                 |
| 2020-05-02                       | Kantipur (Nepali)                               | कोभिडको पटाक्षेप र चाँदीका घेरा                                              |
| 2020-07-20                       | Kantipur (Nepali)                               | कोभिडले शिथिल आर्थतन्त्रमा मौर्दिक नीतिले राहत                               |
| 2020-05-16                       | Online Khabar (Nepali)                          | कोरोना अपडेट : १२ हजारमा परीक्षण, कारेन्टाइनमा १६३६६ जना                     |
| 2020-03-07                       | Kantipur (Nepali)                               | कोरोना असर मास्क उद्योगमा पनि                                                |
| 2020-06-17                       | Kantipur (Nepali)                               | कोरोना अस्थायी अस्पताल बन्द                                                  |
| 2020-04-02                       | Online Khabar (Nepali)                          | कोरोना अस्पतालका डाक्टरको पीडा : घरबेटीले घर नआऊ भने, होटेलमा बसेको छु       |
| 2020-06-21                       | Kantipur (Nepali)                               | कोरोना अस्पतालले संक्रमितलाई सुत्केरी गराउन मानेन                            |
| 2020-05-06                       | Kantipur (Nepali)                               | कोरोना आयो, मानवता हरायो'                                                    |
| 2020-04-26                       | Online Khabar (Nepali)                          | कोरोना उपचार कोषमा शेष घले र जमुना गुरुङको ३ करोड सहयोग                      |
| 2020-08-20                       | Online Khabar (Nepali)                          | कोरोना उपचारमा बेड छुट्याउनुपर्ने निर्णय सच्याऊ : चिकित्सक संघ               |
| 2020-08-13                       | Kantipur (Nepali)                               | कोरोना उपचारमा रेमडेसिभिर प्रयोग गरिने                                       |
| 2020-07-21                       | Online Khabar (Nepali)                          | कोरोना उपचारवापत ८ निजी अस्पतालले लिए २३ लाख भत्ता                           |
| 2020-02-16                       | Kantipur (Nepali)                               | कोरोना कहर                                                                   |
| 2020-08-17                       | Online Khabar (Nepali)                          | कोरोना कहर : बाँकेमा सुकुम्बासी बस्तीका ८५ घरपरिवार भोकभोकै                  |
| 2020-05-31                       | Online Khabar (Nepali)                          | कोरोना कोषको रकम खर्च गर्न थालियो, दुई दर्जन जिल्लामा पठाइए बजेट             |
| 2020-06-16                       | Kantipur (Nepali)                               | कोरोना कोषबाट २४ करोड निकासी                                                 |
| 2020-06-01                       | Kantipur (Nepali)                               | कोरोना कोषबाट खर्च गर्न सुरु                                                 |
| 2020-08-19                       | Kantipur (Nepali)                               | कोरोना कोषमा एनआईसीको १ करोड                                                 |
| 2020-08-14                       | Kantipur (Nepali)                               | कोरोना कोषमा एनएमबी लघुवित्तको १३ लाख                                        |
| 2020-05-25                       | Kantipur (Nepali)                               | कोरोना कोषमा एनबी बैंकको डेढ करोड                                            |
| 2020-06-11                       | Kantipur (Nepali)                               | कोरोना कोषमा नबिलको २६ लाख                                                   |
| 2020-08-17                       | Kantipur (Nepali)                               | कोरोना कोषमा नबिलको ६ करोड                                                   |
| 2020-08-15                       | Kantipur (Nepali)                               | कोरोना कोषमा सनराइजको ७९ लाख                                                 |
| 2020-08-20                       | Kantipur (Nepali)                               | कोरोना कोषमा सिटिजन्सको २० लाख                                               |
| 2020-08-13                       | Kantipur (Nepali)                               | कोरोना कोषमा सिद्धार्थको २ करोड                                              |
| 2020-08-18                       | Kantipur (Nepali)                               | कोरोना कोषमा स्वावलम्बनको १ करोड                                             |
| 2020-06-13                       | Kantipur (Nepali)                               | कोरोना खर्चमा लेखाको छानबिन                                                  |
| 2020-03-18                       | Kantipur (Nepali)                               | कोरोना जोखिम व्यवस्थापन समिति                                                |
| 2020-05-23                       | Online Khabar (Nepali)                          | कोरोना नभएकालाई मात्रै नाकाबाट प्रवेश दिने व्यवस्था गर्न कर्णाली सरकारको माग |
| 2020-02-04                       | Kantipur (Nepali)                               | कोरोना नमस्ते                                                                |
| 2020-05-28                       | Kantipur (Nepali)                               | कोरोना नियन्त्रण र पुराना कार्यक्रममा गण्डकीको जोड                           |
| 2020-08-22                       | Kantipur (Nepali)                               | कोरोना नियन्त्रणमा १२ अर्ब खर्च                                              |
| 2020-07-29                       | Kantipur (Nepali)                               | कोरोना नियन्त्रणमा कहाँ चुक्यो सरकार ?                                       |
| 2020-06-03                       | Online Khabar (Nepali)                          | कोरोना नियन्त्रणमा खटिएकालाई दुर्व्यवहार गर्नेलाई पक्राउ गर्न गृहको निर्देशन |
| 2020-05-07                       | Kantipur (Nepali)                               | कोरोना नियन्त्रणमा चुक्दै सरकार                                              |
| 2020-05-03                       | Kantipur (Nepali)                               | कोरोना नियन्त्रणमा प्रदेशको पहल                                              |
| 2020-08-27                       | Online Khabar (Nepali)                          | कोरोना नियन्त्रणमा प्रदेशले दिएको रकम खर्च भएन : मुख्यमन्त्री राउत           |
| 2020-04-08                       | Online Khabar (Nepali)                          | कोरोना परीक्षण गर्न तीन जिल्लाबाट ८०२ नमुना संकलन                            |
| 2020-04-24                       | Online Khabar (Nepali)                          | कोरोना परीक्षण गर्न सबै पालिकामा स्वास्थ्यकर्मीको टोली                       |

| Date of publication (yyyy/mm/dd) | Name of news media (select from drop-down menu) | Title of news/headline                                                   |
|----------------------------------|-------------------------------------------------|--------------------------------------------------------------------------|
| 2020-04-04                       | Online Khabar (Nepali)                          | कोरोना परीक्षण बढाउन कांग्रेसको माग                                      |
| 2020-08-31                       | Online Khabar (Nepali)                          | कोरोना परीक्षण शुल्क अब ४ हजार मात्र                                     |
| 2020-04-20                       | Online Khabar (Nepali)                          | कोरोना परीक्षणको दायरा समुदाय स्तरसम्म विस्तार गर्नुपर्छ : देउवा         |
| 2020-08-02                       | Online Khabar (Nepali)                          | कोरोना परीक्षणको मापदण्ड परिवर्तन, झाडा पखालाका विरामीको पनि टेष्ट गरिने |
| 2020-04-18                       | Online Khabar (Nepali)                          | कोरोना पोजेटिभको स्वाब काठमाडौं पठाउँदाको सास्ती                         |
| 2020-02-28                       | Kantipur (Nepali)                               | कोरोना प्रभावको आर्थिक सतर्कता                                           |
| 2020-05-24                       | Online Khabar (Nepali)                          | कोरोना प्रभावबारे जानकारी लिन सर्वेक्षण                                  |
| 2020-02-27                       | Kantipur (Nepali)                               | कोरोना प्रभावले औषधिको कच्चा पदार्थ अभाव                                 |
| 2020-03-10                       | Kantipur (Nepali)                               | कोरोना प्रभावित देशबाट हुने आयातमा कडाइ गरिँदै                           |
| 2020-06-10                       | Kantipur (Nepali)                               | कोरोना प्राथमिकतामा परेन                                                 |
| 2020-03-12                       | Kantipur (Nepali)                               | कोरोना फोबिया                                                            |
| 2020-02-26                       | Kantipur (Nepali)                               | कोरोना बारेको गम्भीरता                                                   |
| 2020-08-24                       | Kantipur (Nepali)                               | कोरोना बिमा गर्ने साढे ७ लाख पुगे                                        |
| 2020-06-04                       | Kantipur (Nepali)                               | कोरोना बिमाको मोडालिटी परिमार्जन गरिँदै                                  |
| 2020-06-14                       | Kantipur (Nepali)                               | कोरोना बिमामा दाबी पर्न थाल्यो                                           |
| 2020-06-28                       | Kantipur (Nepali)                               | कोरोना भगाउने जन्तर                                                      |
| 2020-02-24                       | Kantipur (Nepali)                               | कोरोना भाइरस र असंवेदनशील हामी                                           |
| 2020-02-02                       | Kantipur (Nepali)                               | कोरोना भाइरस र सजगता                                                     |
| 2020-02-01                       | Online Khabar (Nepali)                          | कोरोना भाइरसको असर चितवनको पर्यटन व्यवसायमा                              |
| 2020-01-29                       | Online Khabar (Nepali)                          | कोरोना भाइरसको डर, मास्कले छोपिए अनुहार                                  |
| 2020-02-10                       | Kantipur (Nepali)                               | कोरोना भाइरसबाट कसरी बच्ने?                                              |
| 2020-03-04                       | Kantipur (Nepali)                               | कोरोना भित्रिन नदिन सतर्कता                                              |
| 2020-06-09                       | Kantipur (Nepali)                               | कोरोना महामारी र सर्वोच्च अदालतको चासो                                   |
| 2020-08-06                       | Online Khabar (Nepali)                          | कोरोना महामारीमा चाडपर्व मनाउन सरकारले ल्यायो निर्देशिका                 |
| 2020-07-07                       | Online Khabar (Nepali)                          | कोरोना महामारीमा सक्रिय स्वास्थ्यकर्मी र सफाइकर्मी सम्मानित              |
| 2020-08-24                       | Online Khabar (Nepali)                          | कोरोना महामारीमा स्थानीय तरकारीले बजार पायो                              |
| 2020-08-23                       | Online Khabar (Nepali)                          | कोरोना महामारीलाई गिज्याउने बल्लु बजारको दृश्य                           |
| 2020-08-28                       | Online Khabar (Nepali)                          | कोरोना र बाढी प्रभावित ५९७ परिवारलाई खाद्यान्न                           |
| 2020-05-28                       | Online Khabar (Nepali)                          | कोरोना राहत प्याकेज : उद्योगी-कामदारलाई के दियो बजेटले ?                 |
| 2020-05-07                       | Online Khabar (Nepali)                          | कोरोना रिपोर्ट नदेखाई संसद बैठकमा प्रवेश निषेध                           |
| 2020-06-14                       | Kantipur (Nepali)                               | कोरोना रोकथाम र नियन्त्रणमा ८ अर्ब ३९ करोड खर्च                          |
| 2020-08-09                       | Online Khabar (Nepali)                          | कोरोना रोकथामका लागि प्रदेश २ ले संघीय सरकारसँग माग्यो विशेष प्याकेज     |
| 2020-06-25                       | Kantipur (Nepali)                               | कोरोना रोकथामकै वरिपरि                                                   |
| 2020-06-10                       | Online Khabar (Nepali)                          | कोरोना रोकथाममा अन्य प्रदेश भन्दा उत्कृष्ट छौं : मुख्यमन्त्री राई        |
| 2020-03-27                       | Online Khabar (Nepali)                          | कोरोना रोकथाममा प्रदेश २ को तयारी : पैसा छ, उपकरण छैन                    |
| 2020-02-18                       | Kantipur (Nepali)                               | कोरोना रोकथाममा मास्कको प्रभावकारिता                                     |
| 2020-05-02                       | Online Khabar (Nepali)                          | कोरोना रोकथाममा सार्क राष्ट्रमा नेपालको अवस्था राम्रो                    |
| 2020-05-22                       | Kantipur (Nepali)                               | कोरोना रोकथाममा स्थानीय तह                                               |
| 2020-03-14                       | Kantipur (Nepali)                               | कोरोना रोकन प्रशिक्षण                                                    |
| 2020-04-05                       | Online Khabar (Nepali)                          | कोरोना र्यापिड टेस्ट : सुरुमा ३००, त्यसपछि २० हजार !                     |
| 2020-05-20                       | Kantipur (Nepali)                               | कोरोना संकटको वेक-अप कल आइसकेको छ'                                       |
| 2020-02-06                       | Kantipur (Nepali)                               | कोरोना संक्रमण ख्यालठट्टा होइन                                           |

| Date of publication (yyyy/mm/dd) | Name of news media (select from drop-down menu) | Title of news/headline                                                 |
|----------------------------------|-------------------------------------------------|------------------------------------------------------------------------|
| 2020-04-12                       | Online Khabar (Nepali)                          | कोरोना संक्रमण देखिएको ठाउँलाई पूर्ण लकडाउन गर्छौं : मुख्यमन्त्री राउत |
| 2020-04-28                       | Online Khabar (Nepali)                          | कोरोना संक्रमण देखिएपछि रौतहटका दुई गाउँ सिल                           |
| 2020-08-19                       | Online Khabar (Nepali)                          | कोरोना संक्रमणले चितवनका अस्पतालको सेवा खुम्चियो                       |
| 2020-03-28                       | Online Khabar (Nepali)                          | कोरोना संक्रमित किशोरीको परिवारको नमुना नै संकलन गरिएन                 |
| 2020-05-04                       | Online Khabar (Nepali)                          | कोरोना संक्रमित क्षेत्रमा पुगे प्रदेशमन्त्री                           |
| 2020-05-16                       | Online Khabar (Nepali)                          | कोरोना संक्रमित परिवारको पीडा : आत्मबल बढाउनुको साटो खुच्चिड भने       |
| 2020-05-20                       | Online Khabar (Nepali)                          | कोरोना संक्रमित भेटिएपछि भक्तपुरको ल्योसिखेल सिल                       |
| 2020-05-20                       | Online Khabar (Nepali)                          | कोरोना संक्रमित भेटिएपछि मैतीदेवी क्षेत्र सिल                          |
| 2020-05-02                       | Online Khabar (Nepali)                          | कोरोना संक्रमित भेटिएपछि रुपन्देही र बाँकेका चार स्थानमा आउ-जाउ बन्द   |
| 2020-05-14                       | Online Khabar (Nepali)                          | कोरोना संक्रमित महिला केही घण्टा बसेको कैलालीको एक टोललाई सिल गरियो    |
| 2020-08-23                       | Online Khabar (Nepali)                          | कोरोना संक्रमितका लागि मनमोहनको ३३३ शय्याको अस्पताल                    |
| 2020-07-30                       | Online Khabar (Nepali)                          | कोरोना संक्रमितको उचित व्यवस्थापन गर्न माग गर्दै अदालतमा उजुरी         |
| 2020-04-26                       | Online Khabar (Nepali)                          | कोरोना संक्रमितको उपचार गर्न धरानमा बन्यो सुविधासम्पन्न अस्पताल        |
| 2020-07-01                       | Online Khabar (Nepali)                          | कोरोना संक्रमितको उपचार गर्ने अस्पतालले सरकारबाट अनुदान पाउने          |
| 2020-08-13                       | Online Khabar (Nepali)                          | कोरोना संक्रमितको औषधिमा कालोबजारी !                                   |
| 2020-04-09                       | Online Khabar (Nepali)                          | कोरोना संक्रमितको कोठामै छिर्ने नु डाक्टर !                            |
| 2020-08-17                       | Online Khabar (Nepali)                          | कोरोना संक्रमितको घरमा छिमेकीको ताला !                                 |
| 2020-08-20                       | Online Khabar (Nepali)                          | कोरोना संक्रमितको मनोबल बढाउन बुटवलमा 'होम भिजिट' अभियान               |
| 2020-08-19                       | Online Khabar (Nepali)                          | कोरोना संक्रमितलाई अण्डा र मासु                                        |
| 2020-03-08                       | Kantipur (Nepali)                               | कोरोना संक्रमितलाई छैन आईसीयू                                          |
| 2020-07-05                       | Kantipur (Nepali)                               | कोरोना सचेतना दौड                                                      |
| 2020-05-20                       | Kantipur (Nepali)                               | कोरोनाइतर स्वास्थ्य समस्या सतहमा                                       |
| 2020-06-02                       | Kantipur (Nepali)                               | कोरोना-कहरमा राज्यका चुनौती                                            |
| 2020-04-08                       | Online Khabar (Nepali)                          | कोरोनाका कारण कसरी बदलिँदैछ नेपाली संस्कार ?                           |
| 2020-03-12                       | Online Khabar (Nepali)                          | कोरोनाका कारण संसद बैठक रोकन कांग्रेस सांसदको माग                      |
| 2020-05-02                       | Online Khabar (Nepali)                          | कोरोनाका नक्कली बिरामी अस्पतालमा आउँदा...                              |
| 2020-06-11                       | Kantipur (Nepali)                               | कोरोनाका नाममा अपारदर्शी खर्च                                          |
| 2020-05-14                       | Kantipur (Nepali)                               | कोरोनाका भ्रम निराधार                                                  |
| 2020-08-18                       | Kantipur (Nepali)                               | कोरोनाका मृतकको अन्त्येष्टि                                            |
| 2020-08-18                       | Kantipur (Nepali)                               | कोरोनाकालका किताब                                                      |
| 2020-08-09                       | Kantipur (Nepali)                               | कोरोनाकालमा खान्की                                                     |
| 2020-06-01                       | Kantipur (Nepali)                               | कोरोनाकालमा जुठोचोखो                                                   |
| 2020-07-04                       | Kantipur (Nepali)                               | कोरोनाकालमा 'प्लेग' पढ्नु !                                            |
| 2020-05-24                       | Kantipur (Nepali)                               | कोरोनाकालमा स्थानीय तह                                                 |
| 2020-05-05                       | Kantipur (Nepali)                               | कोरोनाको आलोकमा हाम्रो युग                                             |
| 2020-05-14                       | Kantipur (Nepali)                               | कोरोनाको चेपमा लिपुलेक                                                 |
| 2020-07-31                       | Online Khabar (Nepali)                          | कोरोनाको नयाँ हटस्पट बन्न सक्छ काठमाडौं                                |
| 2020-02-12                       | Kantipur (Nepali)                               | कोरोनाको भूराजनीतिक असर                                                |
| 2020-06-16                       | Kantipur (Nepali)                               | कोरोनाको मारमा श्रमिक                                                  |
| 2020-07-13                       | Kantipur (Nepali)                               | कोरोनाको व्यवस्थापन कमजोर                                              |
| 2020-05-05                       | Online Khabar (Nepali)                          | कोरोनाको हटस्पट भुल्के : त्रास कम तर जोखिम उस्तै                       |

| Date of publication (yyyy/mm/dd) | Name of news media (select from drop-down menu) | Title of news/headline                                                 |
|----------------------------------|-------------------------------------------------|------------------------------------------------------------------------|
| 2020-03-09                       | Kantipur (Nepali)                               | कोरोनाको हल्लाले खाद्य संकट                                            |
| 2020-05-31                       | Kantipur (Nepali)                               | कोरोना-त्रासबीच गाउँले जगाएको आशा                                      |
| 2020-05-10                       | Online Khabar (Nepali)                          | कोरोनापछि मिटर घुमे जसरी बढ्दैछ बेरोजगारी                              |
| 2020-05-13                       | Kantipur (Nepali)                               | कोरोनापीडित ऋणीलाई मात्र ब्याज छुट                                     |
| 2020-04-28                       | Kantipur (Nepali)                               | कोरोनाबाट जोगिन काठमाडौं !                                             |
| 2020-03-07                       | Kantipur (Nepali)                               | कोरोनाबाट बच्ने उपाय                                                   |
| 2020-06-02                       | Online Khabar (Nepali)                          | कोरोनाबाट मृत्यु हुनेको परिवारलाई प्रदेश सरकारले एक लाख दिने           |
| 2020-04-15                       | Online Khabar (Nepali)                          | कोरोनाबारे अपवाह फैलाउने पक्राउ                                        |
| 2020-08-10                       | Online Khabar (Nepali)                          | कोरोनाबारे जनचेतना जगाउँदै पर्यटक प्रहरी                               |
| 2020-06-09                       | Online Khabar (Nepali)                          | कोरोनाबारे सरकारलाई कांग्रेसको पाँच प्रश्न                             |
| 2020-03-10                       | Kantipur (Nepali)                               | कोरोनाबारे सूचनामै संक्रमण                                             |
| 2020-07-13                       | Kantipur (Nepali)                               | कोरोनाभन्दा मान्छेको डर !'                                             |
| 2020-04-29                       | Kantipur (Nepali)                               | कोरोनाभन्दा समाजको डर                                                  |
| 2020-08-21                       | Online Khabar (Nepali)                          | कोरोनामा १३ अर्ब ३७ करोड खर्च, धेरै खर्च रक्षा मन्त्रालयबाट            |
| 2020-02-15                       | Kantipur (Nepali)                               | कोरोनामाथि जितपछि आयोजनामा काम ः राजदूत होउ                            |
| 2020-05-20                       | Kantipur (Nepali)                               | कोरोनामुक्त नेपाल पहिलो प्राथमिकता : प्रधानमन्त्री                     |
| 2020-06-14                       | Kantipur (Nepali)                               | कोरोनाले खोस्दै सुनीलको पढ्ने सपना                                     |
| 2020-08-20                       | Kantipur (Nepali)                               | कोरोनाले खोस्यो चाडको रौनक                                             |
| 2020-08-10                       | Kantipur (Nepali)                               | कोरोनाले मृत्यु भएकामध्ये ५७.३ प्रतिशत दीर्घरोगी                       |
| 2020-05-18                       | Kantipur (Nepali)                               | कोरोनाले मृत्यु भएकामा फरक-फरक लक्षण                                   |
| 2020-06-28                       | Kantipur (Nepali)                               | कोरोनाले रोकेन असार विकास                                              |
| 2020-08-06                       | Kantipur (Nepali)                               | कोरोनाले ल्याएको अवसर                                                  |
| 2020-05-28                       | Kantipur (Nepali)                               | कोरोनाले सरकारलाई छोएन                                                 |
| 2020-02-13                       | Kantipur (Nepali)                               | कोरोनाविरुद्ध प्लान बी र सी तयार'                                      |
| 2020-03-03                       | Kantipur (Nepali)                               | कोरोनाविरुद्ध उच्च सतर्कता माग                                         |
| 2020-05-09                       | Kantipur (Nepali)                               | कोरोनाविरुद्ध एक ठाउँ                                                  |
| 2020-03-07                       | Kantipur (Nepali)                               | कोरोनाविरुद्ध एकीकृत योजना माग                                         |
| 2020-02-08                       | Kantipur (Nepali)                               | कोरोनाविरुद्ध एन्टिबायोटिकले काम गर्दैन                                |
| 2020-03-23                       | Online Khabar (Nepali)                          | कोरोनाविरुद्ध लड्न एनआरएनले नेपाल सरकारलाई एक करोड सहयोग गर्ने         |
| 2020-05-24                       | Online Khabar (Nepali)                          | कोरोनाविरुद्ध लड्न वीरगञ्ज महानगरले बाँड्यो चयवनप्रास                  |
| 2020-07-17                       | Kantipur (Nepali)                               | कोरोनाविरुद्ध लड्न सूर्य नेपालको ७ करोड                                |
|                                  | Kantipur (Nepali)                               | कोरोनाविरुद्ध सतर्कता                                                  |
| 2020-02-20                       | Kantipur (Nepali)                               | कोरोनाविरुद्धको संघर्षमा ऐक्यबद्धता                                    |
| 2020-06-22                       | Kantipur (Nepali)                               | कोरोनासँग जुध्नु दिनुहुँ योग                                           |
| 2020-06-07                       | Kantipur (Nepali)                               | कोरोनासँग जुध्नु बेलायतको थप सहयोग                                     |
| 2020-06-06                       | Kantipur (Nepali)                               | कोषमा महासंघको २७ लाख                                                  |
| 2020-05-09                       | Kantipur (Nepali)                               | कोसीबाट ८ जना डिस्चार्ज                                                |
| 2020-06-01                       | Kantipur (Nepali)                               | कारेन्टाइन नै आइसोलेसन                                                 |
| 2020-08-28                       | Kantipur (Nepali)                               | कारेन्टाइन बनाउन २० शय्या सहयोग                                        |
| 2020-04-02                       | Online Khabar (Nepali)                          | कारेन्टाइन बस्नेको कथा : आफन्तले भेट्न मान्दैनन्, फोनमा हालखबर सोध्छन् |
| 2020-02-07                       | Kantipur (Nepali)                               | कारेन्टाइनका लागि चार ठाउँ छान्न निर्देशन                              |
| 2020-02-09                       | Kantipur (Nepali)                               | कारेन्टाइनको संरचना बन्दै                                              |

| Date of publication (yyyy/mm/dd) | Name of news media (select from drop-down menu) | Title of news/headline                                           |
|----------------------------------|-------------------------------------------------|------------------------------------------------------------------|
| 2020-04-26                       | Kantipur (Nepali)                               | कारेन्टाइनको सट्टा होम कारेन्टाइनले जोखिम                        |
| 2020-03-03                       | Kantipur (Nepali)                               | कारेन्टाइनबाट घर फिर्ता                                          |
| 2020-05-04                       | Kantipur (Nepali)                               | कारेन्टाइनबाट भागे १८ भारतीय                                     |
| 2020-05-24                       | Kantipur (Nepali)                               | कारेन्टाइनबाटै संक्रमित भागाभाग                                  |
| 2020-06-09                       | Kantipur (Nepali)                               | 'कारेन्टाइनबारे सीडीओले सही रिपोर्टिङ गर्दैन्'                   |
| 2020-03-01                       | Kantipur (Nepali)                               | कारेन्टाइनबिनै कार्यक्षेत्रमा चिनियाँ                            |
| 2020-02-19                       | Kantipur (Nepali)                               | कारेन्टाइनमा 'संवेदनशीलता अपनाइएन'                               |
| 2020-06-02                       | Kantipur (Nepali)                               | कारेन्टाइनमा कोचाकोचले संक्रमणको जोखिम                           |
| 2020-06-08                       | Kantipur (Nepali)                               | कारेन्टाइनमा चरम लापरवाही                                        |
| 2020-06-23                       | Kantipur (Nepali)                               | कारेन्टाइनमा धेरै खर्च, त्यसमै बिजोग                             |
| 2020-05-19                       | Kantipur (Nepali)                               | कारेन्टाइनमा भद्रगोल                                             |
| 2020-04-19                       | Online Khabar (Nepali)                          | कारेन्टाइनमा राखिएकाहरूलाई वडाध्यक्षले छाडिदिए                   |
| 2020-02-02                       | Kantipur (Nepali)                               | कारेन्टाइनमा राख्न ठाउँ खोजिँदै                                  |
| 2020-02-18                       | Kantipur (Nepali)                               | कारेन्टाइनमा र्यालको नमुना लिइयो                                 |
| 2020-04-29                       | Kantipur (Nepali)                               | कारेन्टाइनमा वृद्धको मृत्यु                                      |
| 2020-02-17                       | Kantipur (Nepali)                               | कारेन्टाइनमा स्यान्डविच र दाल-भात                                |
| 2020-05-10                       | Kantipur (Nepali)                               | कारेन्टाइनमै जन्मिए जुम्ल्याहा                                   |
| 2020-05-19                       | Kantipur (Nepali)                               | क्वारेन्टाइनमै मृत्यु हुनु चरम लापरबाही : विज्ञ                  |
| 2020-06-15                       | Kantipur (Nepali)                               | कारेन्टाइनमै 'सामूहिक बलात्कार' तीन स्वयंसेवक पक्राउ             |
| 2020-05-20                       | Kantipur (Nepali)                               | कारेन्टाइनहरू नाम मात्रका                                        |
| 2020-06-16                       | Kantipur (Nepali)                               | कारेन्टिन' लाई सुरक्षित बनाउने दायित्व कसको?                     |
| 2020-06-16                       | Kantipur (Nepali)                               | कारेन्टिनको औचित्यमाथि प्रश्न                                    |
| 2020-06-11                       | Kantipur (Nepali)                               | कारेन्टिनको कारुणिक कहानी                                        |
| 2020-06-28                       | Kantipur (Nepali)                               | कारेन्टिनमा अनुगमन खै?                                           |
| 2020-08-10                       | Online Khabar (Nepali)                          | कारेन्टिनमा आत्महत्या : विभेद र गरीबी मुख्य कारण                 |
| 2020-07-28                       | Online Khabar (Nepali)                          | कारेन्टिनमा आत्महत्या गरेका पुरुषमा कोरोना पुष्टि                |
| 2020-05-21                       | Kantipur (Nepali)                               | कारेन्टिनलाई सुरक्षित बनाऊ                                       |
| 2020-06-10                       | Kantipur (Nepali)                               | खपत घट्टा किसानले मूल्य पाएनन्                                   |
| 2020-02-05                       | Kantipur (Nepali)                               | खरिपाटीमा 'आइसोलेसन सेन्टर'                                      |
| 2020-02-08                       | Kantipur (Nepali)                               | खरिपाटीमा भवन खाली गरिँदै                                        |
| 2020-07-30                       | Kantipur (Nepali)                               | खर्च घटाउने उपाय खोज्दै बैंक                                     |
| 2020-03-01                       | Kantipur (Nepali)                               | खाडीमा कोरोना संक्रमण बढ्दो नेपालीलाई सतर्क रहन आग्रह            |
| 2020-08-12                       | Kantipur (Nepali)                               | खाने पेट थपिए, अन्नको गेडो छैन                                   |
| 2020-05-05                       | Kantipur (Nepali)                               | खाली ठाउँमा खेती गरे अनुदान                                      |
| 2020-08-14                       | Kantipur (Nepali)                               | खाली हुन थाले उपत्यकाका पसल                                      |
| 2020-08-23                       | Kantipur (Nepali)                               | खाली हुन थाले सटर                                                |
| 2020-06-03                       | Kantipur (Nepali)                               | खाल्डोमा तरकारी, बजारमा अभाव                                     |
| 2020-05-14                       | Kantipur (Nepali)                               | खुम्चियो बैंकहरूको नाफा                                          |
| 2020-06-05                       | Kantipur (Nepali)                               | खुल्न थाले पसल                                                   |
| 2020-05-02                       | Kantipur (Nepali)                               | खोइ के बन्द छ यहाँ?                                              |
| 2020-06-10                       | Kantipur (Nepali)                               | खोइ खर्च विवरण?                                                  |
| 2020-04-28                       | Online Khabar (Nepali)                          | गण्डकमा कोभिड-१९ अस्पताल सञ्चालन अनुमति दिन वीरगञ्ज महानगरको माग |



| Date of publication (yyyy/mm/dd) | Name of news media (select from drop-down menu) | Title of news/headline                                                            |
|----------------------------------|-------------------------------------------------|-----------------------------------------------------------------------------------|
| 2020-05-14                       | Online Khabar (Nepali)                          | गण्डकीका मन्त्री भन्छन्- नेपालीलाई सीमामा परीक्षण गरेर ल्याउनुपर्छ                |
| 2020-08-17                       | Online Khabar (Nepali)                          | गण्डकीमा धमाधम निषेधाज्ञा र लकडाउन                                                |
| 2020-07-15                       | Kantipur (Nepali)                               | गण्डकीलाई सूर्य नेपालको एक करोड                                                   |
| 2020-07-06                       | Kantipur (Nepali)                               | गर्भवती र सुत्केरीलाई विशेष ध्यान दिनुपर्छ                                        |
| 2020-08-18                       | Kantipur (Nepali)                               | गर्भवतीको शल्यक्रियामा सकस                                                        |
| 2020-03-07                       | Kantipur (Nepali)                               | गर्मीमा कोरोना संक्रमणको जोखिम कम                                                 |
| 2020-06-14                       | Kantipur (Nepali)                               | गल्याङ एक साता बन्द                                                               |
| 2020-05-28                       | Online Khabar (Nepali)                          | गाइडलाइन नहुँदा नारायणीबाट जनरल सेवा सञ्चालन गर्न समस्या                          |
| 2020-07-02                       | Kantipur (Nepali)                               | गाउँका लागि सहर                                                                   |
| 2020-05-13                       | Online Khabar (Nepali)                          | गाउँपालिका अध्यक्षको विज्ञप्ति : बर्दियाको कोरोना संक्रमित दाङको अस्पतालमा नल्याऊ |
| 2020-05-10                       | Kantipur (Nepali)                               | गाडी चलाउन समयसीमा                                                                |
| 2020-04-25                       | Kantipur (Nepali)                               | गाडीबाट भित्रिएका सीधै घरमा                                                       |
| 2020-08-12                       | Kantipur (Nepali)                               | गाह्रो भयो भने अस्पताल जान सक्नुहुन्छ, बेड व्यवस्था हुन्छ                         |
| 2020-02-14                       | Kantipur (Nepali)                               | गुम्बा गाउँमा नमुना संकलन                                                         |
| 2020-05-26                       | Online Khabar (Nepali)                          | गुल्मीमा गाउँपालिका अध्यक्षलाई कोरोना संक्रमण                                     |
| 2020-08-20                       | Online Khabar (Nepali)                          | गुल्मीमा शुक्रबार रातिदेखि निषेधाज्ञा                                             |
| 2020-07-17                       | Online Khabar (Nepali)                          | गैँडाकोट नगरपालिका एकसाताका लागि सिल                                              |
| 2020-08-16                       | Online Khabar (Nepali)                          | गोदाममै थन्कियो भन्टिलेटर, घरमै मर्न थाले संक्रमित                                |
| 2020-05-26                       | Online Khabar (Nepali)                          | गौरीफन्टा नाकाबाट एकैदिन ५०१३ नेपाली घर फर्किए                                    |
| 2020-08-24                       | Kantipur (Nepali)                               | घटेन पीसीआर शुल्क                                                                 |
| 2020-04-26                       | Kantipur (Nepali)                               | घट्यो औषधि उत्पादन र बिक्री                                                       |
| 2020-05-05                       | Kantipur (Nepali)                               | घर फर्कने कामदारका पक्षमा                                                         |
| 2020-08-07                       | Kantipur (Nepali)                               | घरकै आइसोलेसनले मनोबल उच्च                                                        |
| 2020-03-07                       | Kantipur (Nepali)                               | घरघरमा जनचेतना जगाउन निर्देशन                                                     |
| 2020-05-30                       | Kantipur (Nepali)                               | घरबाट निस्कन डराउँछन् नरैनापुरवासी                                                |
| 2020-06-16                       | Kantipur (Nepali)                               | घरबाहिर खाँदा कसरी सुरक्षित रहने?                                                 |
| 2020-07-04                       | Kantipur (Nepali)                               | घरभाडामा छुट भए व्यवसाय धानिन्छ                                                   |
| 2020-08-28                       | Kantipur (Nepali)                               | घरमै बनाऔं मास्क                                                                  |
| 2020-08-18                       | Kantipur (Nepali)                               | घरमै बसेका संक्रमितहरूलाई निगरानी गरौं                                            |
| 2020-06-07                       | Kantipur (Nepali)                               | घरमै बस्दा झन् बढी हिंसा ?                                                        |
| 2020-05-20                       | Kantipur (Nepali)                               | घरै बसौं, स्वस्थ रहौं                                                             |
| 2020-03-09                       | Kantipur (Nepali)                               | घरैमा बनाएर बिक्री                                                                |
| 2020-04-27                       | Online Khabar (Nepali)                          | घोराहीमा गरिएको पीसीआर परीक्षणमा ११ जनाको रिपोर्ट नेगेटिभ                         |
| 2020-06-23                       | Kantipur (Nepali)                               | चन्दा उठाएर पीसीआर मेसिन                                                          |
| 2020-08-30                       | Kantipur (Nepali)                               | चमत्कार दाबी गर्दै भीड                                                            |
| 2020-08-06                       | Kantipur (Nepali)                               | चाडपर्व मनाउँदा सावधान रहौं                                                       |
| 2020-05-03                       | Online Khabar (Nepali)                          | चाप बढेपछि उपत्यकामा थप सतर्कता                                                   |
| 2020-04-30                       | Kantipur (Nepali)                               | चामल 'गुणस्तरहीन' भेटिएपछि वितरणमा रोक                                            |
| 2020-03-02                       | Kantipur (Nepali)                               | चार जना आइसोलेसनमा                                                                |
| 2020-08-06                       | Online Khabar (Nepali)                          | चिकित्सक र प्राविधिकले पाएनन्, महानगरका कर्मचारीले लिएर जोखिम भत्ता               |
| 2020-05-22                       | Online Khabar (Nepali)                          | चिकित्सक र महानगरपालिकालाई २ संस्थाको स्वास्थ्य सामग्री                           |

| Date of publication (yyyy/mm/dd) | Name of news media (select from drop-down menu) | Title of news/headline                                               |
|----------------------------------|-------------------------------------------------|----------------------------------------------------------------------|
| 2020-08-12                       | Online Khabar (Nepali)                          | चिकित्सक र स्वास्थ्यकर्मीको पीसीआर गरेर मात्रै सेवामा खटाउन निर्देशन |
| 2020-08-25                       | Online Khabar (Nepali)                          | चितवनका ४ नगरपालिकाले बनाए संयुक्त आइसोलेसन                          |
| 2020-06-15                       | Online Khabar (Nepali)                          | चितवनको कोरोना अस्पताल खाली गराइयो, संक्रमित भरतपुर अस्पतालमा        |
| 2020-05-05                       | Online Khabar (Nepali)                          | चितवनको कोरोना परीक्षण ल्याब पाँच दिनदेखि बन्द                       |
| 2020-08-21                       | Online Khabar (Nepali)                          | चितवनमा एक साता निषेधाज्ञा थपियो                                     |
| 2020-04-01                       | Online Khabar (Nepali)                          | चितवनमा कोरोना भाइरस परीक्षण कहिले ?                                 |
| 2020-08-28                       | Online Khabar (Nepali)                          | चितवनमा भदौ १९ गतेसम्म निषेधाज्ञा                                    |
| 2020-04-05                       | Online Khabar (Nepali)                          | चितवनमा सोमबारबाट कोरोना भाइरसको नमूना परीक्षण सुरु हुने             |
| 2020-03-22                       | Kantipur (Nepali)                               | चित्लाङका होटल बन्द                                                  |
| 2020-08-06                       | Kantipur (Nepali)                               | चिनियाँ दूतावासद्वारा सरकारी ल्याबको रिपोर्ट अस्वीकार                |
| 2020-03-03                       | Kantipur (Nepali)                               | चिनियाँ देख्दा हच्किन्छन् स्थानीय                                    |
| 2020-02-21                       | Kantipur (Nepali)                               | चिनियाँ नआउँदा पुनर्निर्माण रोकियो                                   |
| 2020-03-20                       | Kantipur (Nepali)                               | चिनियाँ सहयोग लिन पत्राचार                                           |
| 2020-08-09                       | Kantipur (Nepali)                               | चिया मजदुर भन्छन्- पुरानै ज्याला पाएँ                                |
| 2020-03-23                       | Kantipur (Nepali)                               | चीन र भारतबाट चिकित्सा सामान ल्याइने                                 |
| 2020-02-02                       | Kantipur (Nepali)                               | चीनतिरै लिएर मास्क                                                   |
| 2020-04-30                       | Kantipur (Nepali)                               | चीनबाट ३ सय ४० टन स्वास्थ्य सामग्री ल्याइँदै                         |
| 2020-02-02                       | Online Khabar (Nepali)                          | चीनबाट उद्धार गरिने नेपालीलाई कहाँ राख्ने ?                          |
| 2020-02-11                       | Kantipur (Nepali)                               | चीनबाट नेपालीको उद्धार गर्न सांसदको माग                              |
| 2020-02-06                       | Kantipur (Nepali)                               | चीनबाट फर्किएकाहरू मान्दैनन् अस्पताल बस्न                            |
| 2020-02-04                       | Kantipur (Nepali)                               | चीनबाट ल्याएपछि १४ दिन निगरानीमा                                     |
| 2020-02-10                       | Kantipur (Nepali)                               | चीनमा रहेका विद्यार्थीको अझै उद्धार भएन                              |
| 2020-02-13                       | Kantipur (Nepali)                               | चीनमै पो सुरक्षित हुन्छन् कि !                                       |
| 2020-05-11                       | Online Khabar (Nepali)                          | चीनले दियो ४० हजार थान पीसीआर किट                                    |
| 2020-03-18                       | Kantipur (Nepali)                               | चीनले राख्यो सहयोग प्रस्ताव                                          |
| 2020-05-18                       | Kantipur (Nepali)                               | चुनौतीको फ्रन्ट लाइनमा साना र मझौला उद्यम                            |
| 2020-05-18                       | Kantipur (Nepali)                               | चैतमा ४ प्रतिशत रेमिट्यान्स घट्यो                                    |
| 2020-03-21                       | Kantipur (Nepali)                               | चोक चोकमा साबुनपानी                                                  |
| 2020-05-12                       | Kantipur (Nepali)                               | छलफलबाट निकास खोज्नुपर्छ                                             |
| 2020-08-12                       | Kantipur (Nepali)                               | छाक टार्ने मुस्किल                                                   |
| 2020-08-19                       | Kantipur (Nepali)                               | छिमेकीको अपमानपछि फेरि आइसोलेसनमै                                    |
| 2020-03-17                       | Kantipur (Nepali)                               | छुट्टै अस्पताल माग                                                   |
| 2020-08-06                       | Kantipur (Nepali)                               | छेकबारले गरिखानै गाह्रो                                              |
| 2020-08-18                       | Kantipur (Nepali)                               | छोटा फिल्ममा कोरोना कहुर                                             |
| 2020-06-21                       | Kantipur (Nepali)                               | छोरा स्याहार्न आमा आइसोलेसनमा                                        |
| 2020-05-05                       | Kantipur (Nepali)                               | छोरी रोइरहन्छे, म सुन्न सकिदैन                                       |
| 2020-06-26                       | Kantipur (Nepali)                               | जँचाउन जानै पाएनन् गर्भवती                                           |
| 2020-08-14                       | Kantipur (Nepali)                               | जटिल अवस्थाका संक्रमितले उपचार नपाउने जोखिम                          |
| 2020-04-24                       | Online Khabar (Nepali)                          | जनकपुरको कोरोना रिपोर्ट काठमाडौंमा पुनः परीक्षण गरिने                |
| 2020-08-09                       | Online Khabar (Nepali)                          | जनकपुरधाममा साउनभरि नै निषेधाज्ञा                                    |
| 2020-05-02                       | Online Khabar (Nepali)                          | जनकपुरमा पुरानै मोडेलको पीसीआर मेसिन                                 |
| 2020-07-03                       | Kantipur (Nepali)                               | जनताको कर, जनप्रतिनिधिलाई सुविधा                                     |

| Date of publication (yyyy/mm/dd) | Name of news media (select from drop-down menu) | Title of news/headline                                              |
|----------------------------------|-------------------------------------------------|---------------------------------------------------------------------|
| 2020-08-31                       | Online Khabar (Nepali)                          | जनमैत्री अस्पतालको भवनमा १०० बेडको आइसोलेसन सञ्चालन                 |
| 2020-08-28                       | Online Khabar (Nepali)                          | जनमैत्री, कान्तिपुर र नेशनल पनि कोभिड विशेष अस्पताल                 |
| 2020-05-25                       | Online Khabar (Nepali)                          | जनसंख्याको दुई प्रतिशतको कोरोना परीक्षण गरिन्छ : प्रधानमन्त्री      |
| 2020-07-03                       | Online Khabar (Nepali)                          | जनस्तरबाट रकम उठाएर डडेलधुरामा पीसीआर मेसिन                         |
| 2020-06-10                       | Kantipur (Nepali)                               | जनस्वास्थ्य प्रयोगशालालाई गुणस्तर प्रमाणपत्र                        |
| 2020-05-23                       | Kantipur (Nepali)                               | जब अँध्यारोमा जून देखियो                                            |
| 2020-05-03                       | Kantipur (Nepali)                               | जमिन बाँझो नराखौं                                                   |
| 2020-06-22                       | Kantipur (Nepali)                               | जसले एक्लाएकलै सम्हालिरहेछन्कारेन्टाइन र आइसोलेसन                   |
| 2020-05-22                       | Kantipur (Nepali)                               | जसले कोरोना जितिन्                                                  |
| 2020-06-25                       | Kantipur (Nepali)                               | जसले संक्रमित सम्हालिरहेकी छन्                                      |
| 2020-05-15                       | Kantipur (Nepali)                               | जीवनरक्षा र घरबाटै कामको योजना                                      |
| 2020-04-05                       | Online Khabar (Nepali)                          | जुन भाग कमजोर, त्यहीँ कोरोनाको दोस्रो हमला                          |
| 2020-07-15                       | Online Khabar (Nepali)                          | जुम्लाको खलङ्गामा निषेधाज्ञा                                        |
| 2020-06-03                       | Online Khabar (Nepali)                          | जुम्लामा ३ दिनका लागि निषेधाज्ञा जारी                               |
| 2020-06-05                       | Online Khabar (Nepali)                          | जेठ २५ देखि निश्चित जिल्लामा छोटो दुरीका सवारी चलाउने प्रस्ताव      |
| 2020-07-22                       | Online Khabar (Nepali)                          | जेठमा मगाएको अटोमेटेड पीसीआर मेसिन साउनमा आइपुग्यो                  |
| 2020-06-12                       | Kantipur (Nepali)                               | जो कोरोना जितेर काममा जुटिसकेका छन्                                 |
| 2020-08-22                       | Kantipur (Nepali)                               | जो दिनभर संक्रमित बोक्छन्                                           |
| 2020-06-09                       | Kantipur (Nepali)                               | जोखिम बढ्यो, सावधानी छैन                                            |
| 2020-06-06                       | Kantipur (Nepali)                               | जोखिम बाँड्ने सहमतिमा कोरोना बिमा पुनः सुरु                         |
| 2020-03-22                       | Kantipur (Nepali)                               | जोखिम रोक्न विपद् कोषबाट खर्च गरिने                                 |
| 2020-07-07                       | Kantipur (Nepali)                               | जोगिने एक मात्र उपाय सावधानी'                                       |
| 2020-05-03                       | Kantipur (Nepali)                               | ज्याला मात्र ६ दिन हिँडेर खोटाङबाट काठमाडौं                         |
| 2020-08-19                       | Kantipur (Nepali)                               | झन्डै ५ हजार महिलालाई सहूलियत ऋण                                    |
| 2020-05-21                       | Online Khabar (Nepali)                          | झापाको कचनकवल गाउँपालिका सिल                                        |
| 2020-05-30                       | Online Khabar (Nepali)                          | झापाबाट धरान पठाइएका संक्रमितलाई भर्ना नगरी रातभर बाहिरै राखियो     |
| 2020-06-26                       | Kantipur (Nepali)                               | टिकट काट्न नसक्नेहरू खाडीमै अलपत्र                                  |
| 2020-08-27                       | Online Khabar (Nepali)                          | टेक अवे र होम डेलिभरी सेवा प्रदायक प्रहरी नियन्त्रणमा               |
| 2020-04-09                       | Online Khabar (Nepali)                          | टेकु अस्पतालको एउटा गेट, जसले संक्रमणबाट जोगाउँछ                    |
| 2020-04-02                       | Online Khabar (Nepali)                          | टेकुमा उपचाररत कोरोना संक्रमित दुई जनाको दोस्रो रिपोर्ट पनि पोजेटिभ |
| 2020-05-13                       | Kantipur (Nepali)                               | टेलिकमको आम्दानी घट्यो                                              |
| 2020-08-27                       | Online Khabar (Nepali)                          | टोखा नगरपालिकाबाट केही सिक्ने कि !                                  |
| 2020-03-03                       | Kantipur (Nepali)                               | टोखा महोत्सव स्थगित                                                 |
| 2020-07-09                       | Kantipur (Nepali)                               | ट्याक्सी चलाउन दिन विकास समितिको निर्देशन                           |
| 2020-08-12                       | Kantipur (Nepali)                               | ट्रेसिड नहुदा संक्रमित घरमै                                         |
| 2020-04-27                       | Kantipur (Nepali)                               | ट्रेसिडको काम सन्तोषजनक : महाशाखा                                   |
| 2020-05-11                       | Kantipur (Nepali)                               | ट्रयाकमा फर्कन आतुर                                                 |
| 2020-03-21                       | Online Khabar (Nepali)                          | ठमेलका अधिकांश होटल रेष्टुराँ बन्द, कर्मचारीलाई बेतलबी बिदा         |
| 2020-05-30                       | Kantipur (Nepali)                               | ठाउँ हेरी लकडाउन खुकुलो पारौं : विश्व                               |
| 2020-06-08                       | Kantipur (Nepali)                               | ठाकुरलाई सहयोग जुट्यो                                               |
| 2020-08-27                       | Online Khabar (Nepali)                          | ठूला अस्पताललाई कोरोना विशेष बनाउ : शान्ति समाज                     |
| 2020-05-18                       | Online Khabar (Nepali)                          | ठोरीको सीमा आइपुगेकाहरूलाई भारततर्फ फर्काइयो                        |

| Date of publication (yyyy/mm/dd) | Name of news media (select from drop-down menu) | Title of news/headline                                                             |
|----------------------------------|-------------------------------------------------|------------------------------------------------------------------------------------|
| 2020-08-27                       | Online Khabar (Nepali)                          | डाक्टरलाई कोरोना देखिएपछि जाजरकोट अस्पतालको ओपीडी सेवा बन्द                        |
| 2020-06-24                       | Kantipur (Nepali)                               | डाबरका सेनिटाइजर र फ्लोर क्लिनर                                                    |
| 2020-03-04                       | Kantipur (Nepali)                               | डेढ महिनामा ४३ लाख मास्क निर्यात                                                   |
| 2020-05-16                       | Online Khabar (Nepali)                          | डेरामा डाक्टर र नर्सलाई अवरोध नगरौं : स्वास्थ्य मन्त्रालय                          |
| 2020-08-24                       | Online Khabar (Nepali)                          | डेरावाल संक्रमितलाई घरबेटीले नै बनाइदिए आइसोलेसन                                   |
| 2020-07-02                       | Kantipur (Nepali)                               | डेरीको कारोबार ६० प्रतिशत                                                          |
| 2020-04-08                       | Online Khabar (Nepali)                          | डोटीबाट ३२६ जनाको नमुना संकलन                                                      |
| 2020-03-20                       | Online Khabar (Nepali)                          | डोटीमा कोरोना रोकथाम : हेल्थ डेस्कदेखि भाकलसम्म                                    |
| 2020-04-12                       | Online Khabar (Nepali)                          | डोटीमा थप चार हजारको र्यापिड टेस्ट गर्न माग                                        |
| 2020-06-10                       | Kantipur (Nepali)                               | डोरीले घेरेर आइसोलेसन                                                              |
| 2020-06-12                       | Kantipur (Nepali)                               | ढुलमुले सरकारी नीति                                                                |
| 2020-06-10                       | Kantipur (Nepali)                               | ढुवानीमा समस्यै समस्या                                                             |
| 2020-03-18                       | Kantipur (Nepali)                               | ढोकेमा साबुन पानी                                                                  |
| 2020-04-12                       | Online Khabar (Nepali)                          | तत्काल कोरोना अस्पताल सञ्चालन गर्न वीरगञ्जका चिकित्सकको माग                        |
| 2020-05-20                       | Kantipur (Nepali)                               | तत्काल ल्याउनुपर्ने नेपाली २० हजार                                                 |
| 2020-08-14                       | Online Khabar (Nepali)                          | तनहुँको भानु नगरपालिकाको एउटै वडाका २० जनामा संक्रमण पुष्टि                        |
| 2020-05-17                       | Kantipur (Nepali)                               | तयार छन् हाम्रा विश्वविद्यालय?                                                     |
| 2020-03-08                       | Kantipur (Nepali)                               | तयार भए आइसोलेसन वार्ड                                                             |
| 2020-06-07                       | Kantipur (Nepali)                               | तरकारी बिक्री नभएपछि चौपायालाई आहारा र मल                                          |
| 2020-08-24                       | Kantipur (Nepali)                               | तरकारीको मूल्य अचाक्ली                                                             |
| 2020-08-12                       | Kantipur (Nepali)                               | तलबको आस मारेर स्वदेश फिर्ती                                                       |
| 2020-03-11                       | Kantipur (Nepali)                               | ताक्लाकोटमा डेढ सय नेपाली अलपत्र                                                   |
| 2020-05-08                       | Kantipur (Nepali)                               | तातोपानी सबै खाले सामानलाई खुला                                                    |
| 2020-03-08                       | Kantipur (Nepali)                               | तापक्रम नाप्दै, बस चढाउँदै                                                         |
| 2020-08-09                       | Kantipur (Nepali)                               | तारे होटलका लगानीकर्ता निराश                                                       |
| 2020-04-09                       | Online Khabar (Nepali)                          | तिलोत्तमा कारेन्टाइनका १० जनाको र्यापिड डाइग्नोस्टिक टेस्ट                         |
| 2020-08-17                       | Online Khabar (Nepali)                          | तीजमा माइत नजान वडा कार्यालयको अनुरोध                                              |
| 2020-05-08                       | Online Khabar (Nepali)                          | तीन दिनभित्र ४ हजार पीसीआर परीक्षण गरिने                                           |
| 2020-08-29                       | Kantipur (Nepali)                               | तीन मन्त्री र प्रधानसेनापति कारेन्टाइनमा                                           |
| 2020-06-29                       | Kantipur (Nepali)                               | तीन महिनामा १८ सय चार्टर उडान                                                      |
| 2020-06-19                       | Kantipur (Nepali)                               | तीन महिनामा एटीएमबाट सवा ५४ अर्ब झिकियो                                            |
| 2020-04-29                       | Kantipur (Nepali)                               | तीन सय भीटीएम आवश्यक, ६० प्राप्त                                                   |
| 2020-05-25                       | Kantipur (Nepali)                               | तीन सय रेजिडेन्ट डाक्टर घर फर्कदै                                                  |
| 2020-04-09                       | Online Khabar (Nepali)                          | तीन स्थानीय तहलाई शर्माको ३० लाख सहयोग                                             |
| 2020-08-06                       | Kantipur (Nepali)                               | तोफिएका केन्द्रबाट हजार नमुना संकलन                                                |
| 2020-06-18                       | Kantipur (Nepali)                               | दक्षिण कोरियाले दियो ५० हजार किट                                                   |
| 2020-06-10                       | Kantipur (Nepali)                               | दबाबमा स्थानीय सरकार                                                               |
| 2020-03-06                       | Kantipur (Nepali)                               | दर्जनभन्दा बढी आयोजना अन्योल                                                       |
| 2020-05-12                       | Online Khabar (Nepali)                          | दशगजाबाट लुकिछिपी आएका थिए रुपन्देहीका ६ जना संक्रमित, एकजना भैरहवासम्म पुगेका थिए |
| 2020-05-09                       | Kantipur (Nepali)                               | दानको प्रचार : कति जायज?                                                           |
| 2020-06-09                       | Kantipur (Nepali)                               | दिनभरि कारेन्टाइन, रात परेपछि घर                                                   |
| 2020-04-24                       | Kantipur (Nepali)                               | दिनरात संक्रमितको हेरचाह                                                           |

| Date of publication (yyyy/mm/dd) | Name of news media (select from drop-down menu) | Title of news/headline                                                       |
|----------------------------------|-------------------------------------------------|------------------------------------------------------------------------------|
| 2020-03-22                       | Kantipur (Nepali)                               | दिल्लीबाट धमाधम फर्किदै नेपाली                                               |
| 2020-05-12                       | Online Khabar (Nepali)                          | दिल्लीबाट हिँडेरे जोगवनी, भारतीय प्रहरीले सीमा कटायो                         |
| 2020-07-11                       | Online Khabar (Nepali)                          | दुई अंकमा झर्‍यो नयाँ संक्रमितको संख्या, सक्रिय संक्रमितभन्दा निको हुने धेरै |
| 2020-08-30                       | Kantipur (Nepali)                               | दुई महिनामा ४० हजार सेयर लगानीकर्ता थपिए                                     |
| 2020-08-30                       | Online Khabar (Nepali)                          | दुई हप्तापछि गोरखामा हटाइयो निषेधाज्ञा, नाकामा भने कडाइ                      |
| 2020-06-23                       | Kantipur (Nepali)                               | दुग्ध पदार्थ बिकाउनै सकस                                                     |
| 2020-08-22                       | Kantipur (Nepali)                               | दुबईमा अलपत्र २ सय ३५ यात्रुलाई सोमबार ल्याइँदै                              |
| 2020-08-24                       | Kantipur (Nepali)                               | दुबईमा अलपत्र २६२ यात्रुको उद्धार                                            |
| 2020-08-26                       | Kantipur (Nepali)                               | दुर्व्यवहारले लज्जित                                                         |
| 2020-06-16                       | Kantipur (Nepali)                               | दूर शिक्षा रेडियो कान्तिपुरमा                                                |
| 2020-08-03                       | Kantipur (Nepali)                               | दूरी र मास्कले मार्सल आर्ट्सको अभ्यास प्रभावित                               |
| 2020-03-17                       | Kantipur (Nepali)                               | देउवाको ध्यानाकर्षण                                                          |
| 2020-02-20                       | Kantipur (Nepali)                               | देखिएन कोभिड-१९                                                              |
| 2020-08-12                       | Online Khabar (Nepali)                          | देवघाट क्षेत्र विकास समितिका अध्यक्षमा कोरोना देखिएपछि देवघाट गाउँपालिका सिल |
| 2020-05-21                       | Kantipur (Nepali)                               | देवचुलीका ५ वटा वडा सिल                                                      |
| 2020-07-10                       | Kantipur (Nepali)                               | देश फर्के ज्यानलाई खतरा                                                      |
| 2020-06-13                       | Kantipur (Nepali)                               | देशव्यापी बन्दै प्रदर्शन                                                     |
| 2020-08-07                       | Kantipur (Nepali)                               | देशव्यापी लकडाउन अनावश्यक                                                    |
| 2020-03-06                       | Kantipur (Nepali)                               | दैनिक ६ पसलमा मात्रै अनुगमन                                                  |
| 2020-07-23                       | Online Khabar (Nepali)                          | दैलेखको ठाटीकाँध गाउँपालिकामा अनिश्चितकालीन निषेधाज्ञा                       |
| 2020-08-20                       | Online Khabar (Nepali)                          | दैलेखमा आजैदेखि चार दिनसम्म निषेधाज्ञा                                       |
| 2020-04-05                       | Online Khabar (Nepali)                          | धनगढीका कोरोना संक्रमित युवकको दोस्रो रिपोर्ट पनि पोजेटिभ                    |
| 2020-04-10                       | Online Khabar (Nepali)                          | धनगढीमा कोरोनाका परीक्षणको उपकरण जडानमा ढिलाइ                                |
| 2020-04-02                       | Online Khabar (Nepali)                          | धनगढीमा कोरोनाको परीक्षण सुरु                                                |
| 2020-08-16                       | Online Khabar (Nepali)                          | धनुषामा एक साताका लागि निषेधाज्ञा जारी                                       |
| 2020-04-05                       | Online Khabar (Nepali)                          | धुलिखेलमा पनि कोरोना परीक्षण, तर सातामा दुई दिनमात्रै                        |
| 2020-05-28                       | Kantipur (Nepali)                               | नबिलको २८ लाख सहयोग                                                          |
| 2020-05-24                       | Online Khabar (Nepali)                          | नयाँबानेश्वरका तीन घर सिल                                                    |
| 2020-05-25                       | Kantipur (Nepali)                               | नरैनापुर निषेधित क्षेत्र घोषणा                                               |
| 2020-05-21                       | Kantipur (Nepali)                               | नरैनापुरका संक्रमितलाई सास्ती                                                |
| 2020-05-26                       | Kantipur (Nepali)                               | नरैनापुरमा खटिए चिकित्सक                                                     |
| 2020-05-24                       | Online Khabar (Nepali)                          | नरैनापुरलाई निषेधित क्षेत्र घोषणा, सेना परिचालन गर्ने निर्णय                 |
| 2020-04-22                       | Online Khabar (Nepali)                          | नर्समा देखिएको आरडीटी पोजेटिभको संकेत : लहरो तान्दा पहरो जाने खतरा           |
| 2020-08-22                       | Kantipur (Nepali)                               | नर्सले मनाए अस्पतालमै                                                        |
| 2020-05-14                       | Online Khabar (Nepali)                          | नवलपरासीका संक्रमित भारतबाट लुकिछिपी आएका थिए                                |
| 2020-06-03                       | Kantipur (Nepali)                               | नष्ट गर्नेलाई कारबाही सिफारिस                                                |
| 2020-03-22                       | Kantipur (Nepali)                               | नाका बन्द गरिदिन प्रदेश १ को माग                                             |
| 2020-06-19                       | Kantipur (Nepali)                               | नाका बन्द हुँदा बीउ आयात बढ्यो                                               |
| 2020-05-27                       | Kantipur (Nepali)                               | नाका-नाकामा घुइँचो                                                           |
| 2020-03-20                       | Kantipur (Nepali)                               | नाकाबाट निर्बाध आवागमन                                                       |
| 2020-05-10                       | Kantipur (Nepali)                               | नाकामा उकुसमुकुस                                                             |

| Date of publication (yyyy/mm/dd) | Name of news media (select from drop-down menu) | Title of news/headline                                        |
|----------------------------------|-------------------------------------------------|---------------------------------------------------------------|
| 2020-06-17                       | Kantipur (Nepali)                               | नाकामा चाप उस्तै, सास्ती घट्टै                                |
| 2020-03-14                       | Kantipur (Nepali)                               | नाकामा छैन पर्याप्त सतर्कता                                   |
| 2020-08-04                       | Online Khabar (Nepali)                          | नाकामा झण्डै ११ हजारको परीक्षण गर्दा ४० जना संक्रमित          |
| 2020-06-13                       | Kantipur (Nepali)                               | नाकामा भारतीयको बलजफती                                        |
| 2020-08-16                       | Online Khabar (Nepali)                          | नाकामा सक्नुभएन, कारेन्टिन बनाएर देखाउनुस् !                  |
| 2020-03-22                       | Kantipur (Nepali)                               | नाकाहरूमा जोखिमपूर्ण आवागमन                                   |
| 2020-06-01                       | Kantipur (Nepali)                               | नाकाहरूमा थामिनसक्नु भीड                                      |
| 2020-03-05                       | Kantipur (Nepali)                               | नाकाहरूमा निगरानी कमजोर                                       |
| 2020-05-18                       | Kantipur (Nepali)                               | नागरिकका दुःखमा सरकार किन बेखबर ?                             |
| 2020-05-04                       | Online Khabar (Nepali)                          | नारायणीका कोरोना संक्रमितको दैनिकी : नमाज पढ्ने, फोनमा गफिने  |
| 2020-07-17                       | Kantipur (Nepali)                               | निःशुल्क मास्क वितरण                                          |
| 2020-05-06                       | Kantipur (Nepali)                               | निको भएकामा पीसीआर पोजिटिभ                                    |
| 2020-05-26                       | Kantipur (Nepali)                               | निको भएर फर्के एकैपल्ट ४३ जना                                 |
| 2020-05-10                       | Kantipur (Nepali)                               | निको हुने दर नबढेकोप्रति विज्ञको चिन्ता                       |
| 2020-08-02                       | Kantipur (Nepali)                               | निगमको घाटा १० अर्ब                                           |
| 2020-08-14                       | Kantipur (Nepali)                               | निजी अस्पताल भन्छन्- 'तोकिएकै शुल्कमा उपचार असम्भव'           |
| 2020-05-26                       | Online Khabar (Nepali)                          | निजी अस्पतालमा र उपत्यका प्रवेश गर्नेको आरडीटी टेस्ट बेकार !  |
| 2020-05-20                       | Online Khabar (Nepali)                          | निजी अस्पताललाई प्रयोग गर्न दिइने आरडीटी किटको गुणस्तरमै शंका |
| 2020-08-27                       | Kantipur (Nepali)                               | निजी अस्पतालले पनि गर्न थाले संक्रमितको उपचार                 |
| 2020-06-16                       | Kantipur (Nepali)                               | निजी आवास पुनर्निर्माणले गति लिँदै                            |
| 2020-06-03                       | Kantipur (Nepali)                               | निजी क्षेत्रको सुझाव समेटेर नयाँ ढाँचा                        |
| 2020-07-02                       | Kantipur (Nepali)                               | निजी शिक्षक अन्योलमा                                          |
| 2020-07-31                       | Kantipur (Nepali)                               | निजीलाई पनि स्वाब संकलन र पीसीआर अनुमति                       |
| 2020-06-03                       | Kantipur (Nepali)                               | निजीलाई पीसीआर परीक्षण गर्न दिने तयारी छैन                    |
| 2020-06-15                       | Kantipur (Nepali)                               | निजीले पीसीआर परीक्षण गर्न पाउने                              |
| 2020-06-09                       | Kantipur (Nepali)                               | निर्मम खर्च कटौतीपछि मात्रै ऋण                                |
| 2020-05-13                       | Kantipur (Nepali)                               | निर्माण क्षेत्रमा कतै काम सुरु, कतै तयारी                     |
| 2020-08-23                       | Kantipur (Nepali)                               | निर्माण व्यवसायीले फिर्ता मागे धरौटी                          |
| 2020-08-30                       | Online Khabar (Nepali)                          | निषेधाज्ञा हटाउन चितवनका उद्योगी व्यवसायीको माग               |
| 2020-08-28                       | Kantipur (Nepali)                               | निषेधाज्ञामा झन् चहलपहल                                       |
| 2020-08-24                       | Kantipur (Nepali)                               | निषेधाज्ञाले महामारी रोक्न सकिन्न                             |
| 2020-08-25                       | Kantipur (Nepali)                               | निषेधाज्ञाले हेटौंटाका प्रायः उद्योग बन्द                     |
| 2020-05-06                       | Kantipur (Nepali)                               | निस्फिक्री घुमफिर गरेका थिए संक्रमित                          |
| 2020-08-07                       | Online Khabar (Nepali)                          | नुवाकोट आजदेखि 'लकडाउन'                                       |
| 2020-08-11                       | Online Khabar (Nepali)                          | नुवाकोटमा निषेधाज्ञा क्षेत्र बढाइयो, सेना परिचालन             |
| 2020-05-08                       | Kantipur (Nepali)                               | नेकपामा बहकिएको बहस                                           |
| 2020-06-27                       | Kantipur (Nepali)                               | नेताका गलामा कोरोना भगाउने कार्ड !                            |
| 2020-06-29                       | Kantipur (Nepali)                               | नेताले भाइस रिमुभिड कार्ड लगाउन छाडे                          |
| 2020-02-19                       | Kantipur (Nepali)                               | नेपाल कोरोनामुक्त : पर्यटन मन्त्रालय                          |
| 2020-05-08                       | Kantipur (Nepali)                               | नेपाल जान सकिने भ्रम फैलाइयो'                                 |
| 2020-05-04                       | Kantipur (Nepali)                               | नेपाल लाइफका कर्मचारीले दिए ८ लाख                             |
| 2020-08-09                       | Online Khabar (Nepali)                          | नेपालगञ्ज वडा प्रहरी कार्यालयका ३० जनामा कोरोना संक्रमण       |
| 2020-05-04                       | Online Khabar (Nepali)                          | नेपालगञ्जमा २५ गतेसम्म निषेधित क्षेत्र घोषणा                  |

| Date of publication (yyyy/mm/dd) | Name of news media (select from drop-down menu) | Title of news/headline                                                          |
|----------------------------------|-------------------------------------------------|---------------------------------------------------------------------------------|
| 2020-05-08                       | Kantipur (Nepali)                               | नेपालगन्जमा ६० किट मात्रै                                                       |
| 2020-05-11                       | Kantipur (Nepali)                               | नेपालगन्जमा पहिलो चरणको ट्रेसिङ पूरा                                            |
| 2020-05-07                       | Online Khabar (Nepali)                          | नेपालमा कोरोना संक्रमण भयावह हुने लक्षण देखिएको छ, सजग रहौं : प्रधानमन्त्री ओली |
| 2020-05-02                       | Online Khabar (Nepali)                          | नेपालमा कोरोनाको प्रयोगशाला परीक्षण १३ हजार मात्र                               |
| 2020-08-27                       | Kantipur (Nepali)                               | नेपालमा निको हुने दर सार्कमै सबैभन्दा कम                                        |
| 2020-04-04                       | Online Khabar (Nepali)                          | नेपालमा पहिलो पटक स्थानीयमा देखियो कोरोना संक्रमण                               |
| 2020-04-02                       | Online Khabar (Nepali)                          | नेपालमा भेटिए कोरोनाका छैटौं संक्रमित                                           |
| 2020-06-05                       | Kantipur (Nepali)                               | नेपाली कामदार आजदेखि आउँदै                                                      |
| 2020-07-21                       | Kantipur (Nepali)                               | नेपाली फर्काउन कम्पनीले चार्टर अनुमति पाएनन्                                    |
| 2020-06-12                       | Kantipur (Nepali)                               | नेपालीलाई उद्धार गर्न ६७ चार्टर उडान हुने                                       |
| 2020-07-07                       | Kantipur (Nepali)                               | नेप्सेको कारोबार प्रणालीमा समस्या                                               |
| 2020-08-30                       | Online Khabar (Nepali)                          | नेसनल मेडिकल कलेजमा ५ सय शय्याको आइसोलेसन केन्द्र बनाइने                        |
| 2020-07-04                       | Kantipur (Nepali)                               | न्युरोडको नबदलिएको चरित्र                                                       |
| 2020-03-27                       | Online Khabar (Nepali)                          | न्यूनतम आवागमन खुला गर्ने सरकारको निर्णय                                        |
| 2020-05-05                       | Kantipur (Nepali)                               | पञ्चकन्याले दियो स्वास्थ्य सामग्री                                              |
| 2020-05-02                       | Kantipur (Nepali)                               | परम्परागत कारेन्टाइन मा पतियाको छाया                                            |
| 2020-07-30                       | Online Khabar (Nepali)                          | परवानीपुरमा कोरोनाले मृत्यु हुनेको परम्परागतरूपमै अन्त्येष्टि गर्ने निर्णय      |
| 2020-07-31                       | Kantipur (Nepali)                               | परीक्षण कम गरे सरकार सफल !                                                      |
| 2020-06-15                       | Kantipur (Nepali)                               | परीक्षण ढिलाइले कामदारको उडान सँदै                                              |
| 2020-06-24                       | Kantipur (Nepali)                               | परीक्षण ढिलाइले जोखिम बढ्दो                                                     |
| 2020-03-23                       | Kantipur (Nepali)                               | परीक्षण थोरै                                                                    |
| 2020-05-14                       | Kantipur (Nepali)                               | परीक्षण दायरा बढाउन सांसदको माग                                                 |
| 2020-06-11                       | Kantipur (Nepali)                               | परीक्षण नगर्दाको जटिलता                                                         |
| 2020-06-11                       | Kantipur (Nepali)                               | परीक्षणबिना घर                                                                  |
| 2020-05-28                       | Kantipur (Nepali)                               | परीक्षणबिना धमाधम भित्रिँदै                                                     |
| 2020-05-22                       | Kantipur (Nepali)                               | परीक्षणबिना भारतबाट भित्रिए ४२ सय                                               |
| 2020-06-10                       | Kantipur (Nepali)                               | परीक्षणबिना संक्रमित धमाधम घर                                                   |
| 2020-06-04                       | Kantipur (Nepali)                               | परीक्षणसँगै खाँचो मनोबलको                                                       |
| 2020-07-26                       | Kantipur (Nepali)                               | परीक्षासँगै सुरक्षा र सहूलियत                                                   |
| 2020-03-09                       | Kantipur (Nepali)                               | पर्यटक नआएपछि चिज उद्योग बन्द                                                   |
| 2020-07-07                       | Kantipur (Nepali)                               | पर्यटक पर्खिरहेछन् व्यवसायी                                                     |
| 2020-05-27                       | Kantipur (Nepali)                               | पर्यटन क्षेत्रमा ५ वर्षपछि ९ लाखलाई रोजगारी                                     |
| 2020-04-05                       | Online Khabar (Nepali)                          | पर्साका कारेन्टाइनमा ३९ जना, १३७ जना फर्किए                                     |
| 2020-07-31                       | Online Khabar (Nepali)                          | पर्सागढी नगरपालिका अनिश्चितकालका लागि बन्द                                      |
| 2020-07-28                       | Online Khabar (Nepali)                          | पर्सागढीका ५ वटै स्वास्थ्य संस्थाका स्वास्थ्यकर्मीमा कोरोना संक्रमण             |
| 2020-07-23                       | Online Khabar (Nepali)                          | पर्सामा ५ थुनुवासहित ३२ जनामा कोरोना संक्रमण पुष्टि                             |
| 2020-08-01                       | Online Khabar (Nepali)                          | पर्सामा कोरोना संक्रमितको शव व्यवस्थापन टोली र स्थानीयबीच झडप, ७ प्रहरी घाइते   |
| 2020-08-16                       | Online Khabar (Nepali)                          | पर्सामा निषेधाज्ञामा कडा पार्न सेना परिचालन                                     |
| 2020-08-08                       | Online Khabar (Nepali)                          | पर्सामा मेयरसहित ५५ जनामा कोरोना, ल्याबका कर्मचारी पनि संक्रमित                 |
| 2020-08-27                       | Online Khabar (Nepali)                          | पर्सामा सबै ठाउँमा निषेधाज्ञा जरुरी देखिएन : प्रजिअ तामाङ                       |
| 2020-06-14                       | Kantipur (Nepali)                               | पसल खुले पनि छैनन् ग्राहक                                                       |
| 2020-06-07                       | Kantipur (Nepali)                               | पसल खोल्दा घरबेटीको ताला                                                        |

| Date of publication (yyyy/mm/dd) | Name of news media (select from drop-down menu) | Title of news/headline                                                |
|----------------------------------|-------------------------------------------------|-----------------------------------------------------------------------|
| 2020-06-11                       | Kantipur (Nepali)                               | पसल बन्दविरुद्ध व्यवसायीको प्रदर्शन                                   |
| 2020-05-06                       | Kantipur (Nepali)                               | पहिचान लुकाउँदा कन्ट्याक्ट ट्रेसिङ जटिल                               |
| 2020-06-09                       | Kantipur (Nepali)                               | पहिलो उडानमै मापदण्ड 'फेल'                                            |
| 2020-08-16                       | Kantipur (Nepali)                               | पहुँचवालाका घरघरै पीसीआर                                              |
| 2020-05-19                       | Kantipur (Nepali)                               | पानीसमेत छैन                                                          |
| 2020-06-23                       | Kantipur (Nepali)                               | पालिकाभित्रै प्रयोगशाला बनाउनुपर्छ                                    |
| 2020-06-26                       | Kantipur (Nepali)                               | पालिकाहरूमा कतै कर छुट, कतै मिनाहा                                    |
| 2020-05-06                       | Kantipur (Nepali)                               | पास भएपछि कसरी रोक्नु? : सुरक्षाकर्मी                                 |
| 2020-06-25                       | Kantipur (Nepali)                               | पास र पीसीआरमा लुकेको नियत                                            |
| 2020-05-06                       | Kantipur (Nepali)                               | पीडितलाई सविता दम्पतीको सहयोग                                         |
| 2020-05-13                       | Kantipur (Nepali)                               | पीसीआर परीक्षण गरेर भित्र्याउने योजना                                 |
| 2020-04-27                       | Kantipur (Nepali)                               | पीसीआर परीक्षण घट्टै                                                  |
| 2020-06-07                       | Kantipur (Nepali)                               | पीसीआर परीक्षण निजीलाई पनि देऊ                                        |
| 2020-07-11                       | Kantipur (Nepali)                               | पीसीआर परीक्षण शुल्क अत्यधिक महँगो                                    |
| 2020-08-30                       | Online Khabar (Nepali)                          | पीसीआर परीक्षणको शुल्क घट्यो                                          |
| 2020-07-24                       | Online Khabar (Nepali)                          | पीसीआर परीक्षणबारे वीरगञ्ज महानगरका गुनासै गुनासा                     |
| 2020-08-28                       | Kantipur (Nepali)                               | पीसीआर शुल्क तोकिएभन्दा बढी                                           |
| 2020-08-31                       | Kantipur (Nepali)                               | पीसीआरको अधिकतम शुल्क अब ४४००                                         |
| 2020-05-09                       | Kantipur (Nepali)                               | पुनरुत्थानका लागि तत्काल दुई खर्ब चाहिने                              |
| 2020-05-19                       | Kantipur (Nepali)                               | पुनरुत्थानकेन्द्रित बजेट ल्याउन सुझाव                                 |
| 2020-07-13                       | Kantipur (Nepali)                               | पुनरुत्थानको जिम्मा मौद्रिक नीतिलाई                                   |
| 2020-07-19                       | Kantipur (Nepali)                               | पुनरुत्थानमा सघाउँछ : महासंघ                                          |
| 2020-05-22                       | Kantipur (Nepali)                               | पुनर्कर्जा कार्यान्वयनको पाटो                                         |
| 2020-08-01                       | Kantipur (Nepali)                               | पूर्ण कारेन्टाइनमा प्रशिक्षण                                          |
| 2020-03-16                       | Kantipur (Nepali)                               | पूर्वतयारीको एकीकृत खाका बनाउन निर्देशन                               |
| 2020-03-06                       | Kantipur (Nepali)                               | पूर्वतयारीमा जुट्न विज्ञको सुझाव                                      |
| 2020-08-16                       | Online Khabar (Nepali)                          | पेट्रोल पम्प व्यवसायीको आग्रह : बरु चाहिएजति लानुस्, पटक पटक नआउनुस्  |
| 2020-05-13                       | Online Khabar (Nepali)                          | पोखरा प्रयोगशालाले कोरोनाको परीक्षण गर्न मानेन'                       |
| 2020-03-28                       | Online Khabar (Nepali)                          | पोखराको १ सय ५० वेडको कारेन्टाइन : कतै भवनमात्र, कतै स्थानीयको विरोध  |
| 2020-03-04                       | Kantipur (Nepali)                               | पोखरामा आइसोलेसन वार्ड                                                |
| 2020-06-02                       | Online Khabar (Nepali)                          | पोखरामा एक हप्तामै दोब्बर महंगियो तरकारी                              |
| 2020-07-14                       | Online Khabar (Nepali)                          | पोखरामा बिना मास्क हिँड्ने १०२ जना कारबाहीमा परे                      |
| 2020-05-15                       | Kantipur (Nepali)                               | प्रक्रिया सुरु भएका योजना अलपत्र                                      |
| 2020-06-11                       | Kantipur (Nepali)                               | प्रतिरोधात्मक क्षमता बढी हुने उमेर समूहकै धेरै संक्रमित               |
| 2020-05-24                       | Kantipur (Nepali)                               | प्रतिवेदन लुकाएर र्यापिड किट प्रयोग                                   |
| 2020-08-04                       | Online Khabar (Nepali)                          | प्रत्येक प्रदेशमा तत्काल १ लाख पीसीआर टेस्ट गर्न देउवाको सुझाव        |
| 2020-04-09                       | Online Khabar (Nepali)                          | प्रत्येक प्रदेशमा पठाइयो ५/५ हजार र्यापिड टेस्ट किट                   |
| 2020-03-16                       | Kantipur (Nepali)                               | प्रत्येक प्रदेशमा परीक्षण केन्द्र माग                                 |
| 2020-08-09                       | Online Khabar (Nepali)                          | प्रदेश १ मा ३०० आइसोलेसन बेड थपिने                                    |
| 2020-05-24                       | Online Khabar (Nepali)                          | प्रदेश १ मा कोरोना अस्पताल थपिँदै, सिद्धबाबाको आश्रम पनि प्रयोग गरिने |
| 6/24/2020                        | Kantipur (Nepali)                               | प्रदेश १ मा कोरोनाका लागि २५ करोड खर्च                                |



| Date of publication (yyyy/mm/dd) | Name of news media (select from drop-down menu) | Title of news/headline                                                             |
|----------------------------------|-------------------------------------------------|------------------------------------------------------------------------------------|
| 2020-07-14                       | Kantipur (Nepali)                               | प्रदेश १ लाई ग्लोबलको १० लाख                                                       |
| 2020-07-27                       | Online Khabar (Nepali)                          | प्रदेश २ का आठ जिल्लामा ९ वटामात्रै भेन्टिलेटर                                     |
| 2020-04-24                       | Online Khabar (Nepali)                          | प्रदेश २ का सबै जिल्लामा स्वास्थ्यकर्मीको टोली, १५ सय बढी नमूना संकलन गर्ने लक्ष्य |
| 2020-08-04                       | Online Khabar (Nepali)                          | प्रदेश २ मा ५ सय बेडको आइसोलेसन थपिने                                              |
| 2020-05-29                       | Online Khabar (Nepali)                          | प्रदेश २ मा एकै दिन थपिए ९२ जना संक्रमित                                           |
| 2020-04-25                       | Online Khabar (Nepali)                          | प्रदेश २ मा कोरोनाविरुद्ध लड्न सुस्त तयारी, नारायणी अस्पतालको मात्र भर             |
| 2020-08-21                       | Online Khabar (Nepali)                          | प्रदेश २ मा निजी अस्पताललाई कोरोना उपचारमा लगाइने                                  |
| 2020-08-18                       | Online Khabar (Nepali)                          | प्रदेश २ मा निजी स्वास्थ्य संस्थालाई कोरोना उपचारमा लगाइने                         |
| 2020-05-06                       | Online Khabar (Nepali)                          | प्रदेश २ मा पीसीआर परीक्षणमा तीव्रता, २६ सय बढीको स्वाब संकलन                      |
| 2020-08-09                       | Online Khabar (Nepali)                          | प्रदेश ५ की सांसद केसीलाई कोरोना संक्रमण पुष्टि                                    |
| 2020-04-18                       | Online Khabar (Nepali)                          | प्रदेश ५ मा कोरोना रोकथाम र उपचार कामचलाउमात्र                                     |
| 2020-07-29                       | Online Khabar (Nepali)                          | प्रदेश ५ मा कोरोना संक्रमणको 'सेकेण्ड वेभ' को डर                                   |
| 2020-05-21                       | Online Khabar (Nepali)                          | प्रदेश ५ मा थप २५० आइसोलेसन बेड बनाउने निर्णय                                      |
| 2020-06-17                       | Kantipur (Nepali)                               | प्रदेश ५ ले दियो करमा छुट्टेछुट                                                    |
| 2020-05-06                       | Online Khabar (Nepali)                          | प्रदेश ५ सरकारले माग्यो कोरोना परीक्षण किट र पीपीई                                 |
| 2020-08-24                       | Online Khabar (Nepali)                          | प्रदेश मन्त्रालयलाई प्रश्न : महामारीमा तलब-भत्ता खाएर मात्रै बस्ने हो ?            |
| 2020-05-12                       | Kantipur (Nepali)                               | प्रदेश सरकारहरूलाई बजेटको चटारो                                                    |
| 2020-06-16                       | Kantipur (Nepali)                               | प्रदेशलाई लक्ष्मीको स्वास्थ्य सामग्री                                              |
| 2020-03-18                       | Kantipur (Nepali)                               | प्रदेशसभा बैठक स्थगित गर्न माग                                                     |
| 2020-05-19                       | Kantipur (Nepali)                               | प्रदेशसभाले बोलायो बजेट अधिवेशन                                                    |
| 2020-06-21                       | Kantipur (Nepali)                               | प्रदेशहरूमा पनि फजुल खर्च                                                          |
| 2020-05-25                       | Kantipur (Nepali)                               | प्रदेशहरूमा स्वास्थ्य संकट                                                         |
| 2020-06-25                       | Kantipur (Nepali)                               | प्रधानमन्त्रीको कोरोना 'औषधि'                                                      |
| 2020-05-23                       | Online Khabar (Nepali)                          | प्रधानमन्त्रीज्यू, कारेन्टाइनस्थलबाटै कोरोना फैलियो !                              |
| 2020-07-31                       | Online Khabar (Nepali)                          | प्रधानमन्त्रीसँग वीरगञ्जमा ५ सय शय्याको कोभिड अस्पतालको माग                        |
| 2020-06-19                       | Kantipur (Nepali)                               | प्रयोग नभएको औषधि गोदाममा छ : सेना                                                 |
| 2020-05-26                       | Kantipur (Nepali)                               | प्रयोगशालामा थुप्रैदि स्वाब                                                        |
| 2020-06-10                       | Kantipur (Nepali)                               | प्रयोगशालामा स्वाबको थुप्रो                                                        |
| 2020-04-27                       | Kantipur (Nepali)                               | प्रवासी नेपालीको अवस्था आकलन गर्दै परराष्ट्र                                       |
| 2020-08-24                       | Kantipur (Nepali)                               | प्रहरीकै सुरक्षा कसले गर्ने?                                                       |
| 2020-04-24                       | Kantipur (Nepali)                               | प्रहरीसँग छैन घर फर्कनेको विवरण                                                    |
| 2020-07-27                       | Online Khabar (Nepali)                          | प्रादेशिक अस्पतालको आईसीयू एक साताका लागि बन्द                                     |
| 2020-05-13                       | Kantipur (Nepali)                               | प्रायः उद्योग 'पर्ख र हेर'मा                                                       |
| 2020-08-03                       | Kantipur (Nepali)                               | प्लाज्मा थेरापीले जगायो आशा                                                        |
| 2020-05-10                       | Kantipur (Nepali)                               | फाजिलका कर्मचारीलाई स्थानीय तहमा पठाइने                                            |
| 2020-05-09                       | Kantipur (Nepali)                               | फिर्न चाहनेको दशगजामा भीड                                                          |
| 2020-05-15                       | Kantipur (Nepali)                               | फेरि बन्द भयो सेयर बजार                                                            |
| 2020-07-11                       | Kantipur (Nepali)                               | फेरि बन्द हुने अवस्थामा सपिङ मल                                                    |
| 2020-03-22                       | Kantipur (Nepali)                               | फोनबाटै परामर्श                                                                    |
| 2020-08-13                       | Kantipur (Nepali)                               | फ्रन्टलाइनका स्वास्थ्यकर्मीको पीसीआर गराउनु                                        |
| 2020-05-24                       | Online Khabar (Nepali)                          | फ्रन्टलाइनमा खटिने स्वास्थ्यकर्मीको पीडा                                           |
| 2020-03-17                       | Kantipur (Nepali)                               | फ्रन्टलाइनमै छैन उच्च सावधानी                                                      |

| Date of publication (yyyy/mm/dd) | Name of news media (select from drop-down menu) | Title of news/headline                                            |
|----------------------------------|-------------------------------------------------|-------------------------------------------------------------------|
| 2020-08-27                       | Kantipur (Nepali)                               | बंगलादेशबाट रेमडेसिभिर सहयोग                                      |
| 2020-07-04                       | Kantipur (Nepali)                               | बजार खुला, व्यापार ठप्प                                           |
| 2020-03-06                       | Kantipur (Nepali)                               | बजारमा चलखेल हुन नदेऊ                                             |
| 2020-05-04                       | Kantipur (Nepali)                               | बजेट अधिवेशन रद्द गतेदेखि                                         |
| 2020-08-01                       | Kantipur (Nepali)                               | बजेट छुट्याइयो, ल्याइएनन् भन्टिलेटर                               |
| 2020-05-28                       | Kantipur (Nepali)                               | बजेट स्वास्थ्य र रोजगारी वरिपरि                                   |
| 2020-05-27                       | Kantipur (Nepali)                               | बजेटबाट अपेक्षा                                                   |
| 2020-05-11                       | Kantipur (Nepali)                               | बजेटमा ६ क्षेत्रलाई प्राथमिकता                                    |
| 2020-05-17                       | Kantipur (Nepali)                               | बजेटलाई स्रोत जुटाउन मुस्किल                                      |
| 2020-05-19                       | Kantipur (Nepali)                               | बजेटले बोल्नेपर्ने विषय                                           |
| 2020-07-03                       | Online Khabar (Nepali)                          | बझाङमा कोरोना संक्रमित युवकले गरे आत्महत्या                       |
| 2020-07-16                       | Kantipur (Nepali)                               | बढाइएन पीसीआर परीक्षण                                             |
| 2020-06-17                       | Kantipur (Nepali)                               | बढेन कोरोनाबाट निको हुने दर                                       |
| 2020-05-21                       | Kantipur (Nepali)                               | बढ्दै छ अत्यावश्यक वस्तु आयात                                     |
| 2020-05-04                       | Kantipur (Nepali)                               | बढ्दो बन्दाबन्दीमा शिक्षा                                         |
| 2020-05-12                       | Kantipur (Nepali)                               | बढ्दो महामारी हल्का तम्तयारी                                      |
| 2020-05-16                       | Kantipur (Nepali)                               | बदलियो प्राथमिकता                                                 |
| 2020-02-25                       | Kantipur (Nepali)                               | बनेन थर्मल स्क्यानर                                               |
| 2020-07-23                       | Kantipur (Nepali)                               | बन्दाबन्दी खुले पनि खतरा कायमै                                    |
| 2020-03-17                       | Kantipur (Nepali)                               | बरामद मास्क सरकारले बेच्ने                                        |
| 2020-08-10                       | Kantipur (Nepali)                               | बल्ल आइसोलेसन भवन खोजी                                            |
| 2020-08-22                       | Online Khabar (Nepali)                          | बल्ल आइसोलेसन सेन्टर बनाउन जुटे चितवनका स्थानीय तह                |
| 2020-06-14                       | Kantipur (Nepali)                               | बस गुड्दै नन्, बैंकले किस्ता छाड्दै नन्                           |
| 2020-03-05                       | Kantipur (Nepali)                               | बस चढ्दा ज्वरो नाप्नुपर्ने                                        |
| 2020-07-05                       | Kantipur (Nepali)                               | बस व्यवसायीलाई कर्जाकै पिरलो                                      |
| 2020-05-19                       | Online Khabar (Nepali)                          | बाँकेको नरैनापुर अनिश्चितकालका लागि सिल                           |
| 2020-05-28                       | Kantipur (Nepali)                               | बाँकेमा निषेधाज्ञा                                                |
| 2020-08-11                       | Online Khabar (Nepali)                          | बाँकेमा फेरि थपियो निषेधाज्ञा                                     |
| 2020-08-04                       | Online Khabar (Nepali)                          | बाँकेमा शनिबारसम्म लम्ब्याइयो निषेधाज्ञा                          |
| 2020-05-05                       | Kantipur (Nepali)                               | बाँझो जग्गा खेती गर्न विपन्नलाई                                   |
| 2020-06-13                       | Kantipur (Nepali)                               | बाइकमा एक जना अव्यावहारिक                                         |
| 2020-05-15                       | Online Khabar (Nepali)                          | बागलुङमा संक्रमितको सम्पर्कमा आएका १२० जनाको स्वाब परीक्षण गरिँदै |
| 2020-06-19                       | Online Khabar (Nepali)                          | बाजुराको कारेन्टिना आत्महत्या गरेको ६ दिनपछि कोरोना पुष्टि        |
| 2020-07-02                       | online Khabar (Nepali)                          | बारपाक सुलीकोटमा स्वास्थ्यकर्मी पठाउन प्रदेश सांसद दवाडीको माग    |
| 2020-08-31                       | Online Khabar (Nepali)                          | बारबरा फाउन्डेसनले स्वास्थ्यकर्मी र सुरक्षाकर्मीलाई सम्मान गर्ने  |
| 2020-07-06                       | Online Khabar (Nepali)                          | बारामा मास्क प्रयोग नगर्दा १०२ जनाले तिरे जरीवाना                 |
| 2020-04-29                       | Online Khabar (Nepali)                          | बारामा संक्रमित भेटिएको दुई गाउँ सिल                              |
| 2020-08-11                       | Online Khabar (Nepali)                          | बारामा स्थानीय तहहरुले पीसीआर मेसिन खरिद गर्ने                    |
| 2020-07-03                       | Kantipur (Nepali)                               | बालबालिका उच्च जोखिममा छन्'                                       |
| 2020-05-08                       | Kantipur (Nepali)                               | बालबालिकालाई मानसिक दबाबमा नपार'                                  |
| 2020-07-15                       | Kantipur (Nepali)                               | बाल्ट्राको ह्यान्ड सेनिटाइजर डिस्पेन्सर                           |
| 2020-05-21                       | Kantipur (Nepali)                               | बिनातयारी निजीलाई कोरोना परीक्षण अनुमति                           |

| Date of publication (yyyy/mm/dd) | Name of news media (select from drop-down menu) | Title of news/headline                                                        |
|----------------------------------|-------------------------------------------------|-------------------------------------------------------------------------------|
| 2020-04-04                       | Online Khabar (Nepali)                          | बिरामीको उपचार नगर्ने निजी अस्पताललाई कारबाही गर : नागरिक समाज                |
| 2020-07-28                       | Kantipur (Nepali)                               | बिहारमा संक्रमण बढ्यो, नेपालमा झन् जोखिम                                      |
| 2020-08-15                       | Kantipur (Nepali)                               | बुटवलमा आधा घण्टामै कोरोना परीक्षण                                            |
| 2020-08-24                       | Online Khabar (Nepali)                          | बुटवलमा जनशक्ति अभाव, भैरहवामा आईसीयू वेड अलपत्र                              |
| 2020-03-21                       | Kantipur (Nepali)                               | बुटवलमा पनि कोरोना अस्पताल                                                    |
| 2020-08-12                       | Online Khabar (Nepali)                          | बुटवलमा भदौ ५ गतेसम्म लकडाउन                                                  |
| 2020-08-31                       | Online Khabar (Nepali)                          | बुटवलमा स्वास्थ्य सामग्रीमा कालोबजारी                                         |
| 2020-08-14                       | Online Khabar (Nepali)                          | बुढानीलकण्ठ नगरपालिका- १० मा ५ जना भन्दा बढी भेला हुन प्रतिबन्ध               |
| 2020-05-18                       | Online Khabar (Nepali)                          | बुढानीलकण्ठको तेन्डि चोक सिल, तारकेश्वरमा प्रवेश निषेध                        |
| 2020-05-18                       | Kantipur (Nepali)                               | बेथिति हटाउन निर्मम बन्ने अवसर                                                |
| 2020-03-06                       | Kantipur (Nepali)                               | बेन्च-बारको दूरी बढ्यो                                                        |
| 2020-06-15                       | Kantipur (Nepali)                               | बेपरवाह घरबाहिर                                                               |
| 2020-05-29                       | Kantipur (Nepali)                               | बेरोजगारलाई कृषिमा लगाउन भूमि बैंक                                            |
| 2020-06-25                       | Kantipur (Nepali)                               | बेलायतबाट फर्किए १४६ नेपाली                                                   |
| 2020-07-17                       | Kantipur (Nepali)                               | बैंक किस्ता तिर्ने समय ३ महिनादेखि १ वर्ष थपिँदै                              |
| 2020-06-13                       | Kantipur (Nepali)                               | बैंकमा आउन थाल्यो कर्जा माग                                                   |
| 2020-07-06                       | Kantipur (Nepali)                               | बैंक र बीमा कम्पनीहरु शाखा घटाउने रणनीतिमा                                    |
| 2020-05-05                       | Kantipur (Nepali)                               | ब्याजदर घटाउन माग                                                             |
| 2020-03-06                       | Kantipur (Nepali)                               | भक्तपुर महोत्सव स्थगित                                                        |
| 2020-05-14                       | Kantipur (Nepali)                               | भक्तपुरमा घर बाहिर निस्कन निषेध                                               |
| 2020-07-08                       | Online Khabar (Nepali)                          | भक्तपुरमा मास्क नलगाई हिँड्ने ४८ जना पक्राउ                                   |
| 2020-08-14                       | Online Khabar (Nepali)                          | भरतपुर अस्पताल आएका १३ जनामा कोरोना, नर्स पनि संक्रमित भएपछि आकस्मिक कक्ष सिल |
| 2020-08-16                       | Online Khabar (Nepali)                          | भरतपुर क्यान्सर अस्पतालमा अत्यावश्यकबाहेकका सेवा बन्द                         |
| 2020-06-11                       | Online Khabar (Nepali)                          | भरतपुर महानगरका वडा धमाधम 'सिल', बैंकसमेत बन्द गराइयो                         |
| 2020-08-14                       | Online Khabar (Nepali)                          | भरतपुर महानगरमा एकसाता लकडाउन                                                 |
| 2020-08-14                       | Online Khabar (Nepali)                          | भरतपुरमा अत्यावश्यक बाहेकका पसल र गाडी बन्द                                   |
| 2020-06-18                       | Kantipur (Nepali)                               | भर्चुअल कक्षामा प्रदेशको प्राथमिकता                                           |
| 2020-05-04                       | Kantipur (Nepali)                               | भर्चुअल पठनपाठनका अफ्ठ्यारा                                                   |
| 2020-08-30                       | Online Khabar (Nepali)                          | भर्चुअल बैठकमा गृहमन्त्रीको गुनासो : ब्यारेक र जेलमा कोरोना बढ्यो             |
| 2020-03-11                       | Kantipur (Nepali)                               | भाइरस फैलिए चीनले सहयोग गर्ने                                                 |
| 2020-05-25                       | Kantipur (Nepali)                               | भाइरसभन्दा खतरनाक कारेन्टिन                                                   |
| 2020-06-03                       | Kantipur (Nepali)                               | भाइरसभन्दा लकडाउन खतरनाक                                                      |
| 2020-07-12                       | Kantipur (Nepali)                               | भाडा र ऋणको बोझले ७० होटल बन्द                                                |
| 2020-05-17                       | Online Khabar (Nepali)                          | भारत तथा तेस्रो मुलकबाट हरेक दिन ६ हजारको उद्धार गर्ने प्रस्ताव               |
| 2020-03-20                       | Kantipur (Nepali)                               | भारततर्फ सीमा 'सिल' गर्ने प्रस्ताव                                            |
| 2020-05-18                       | Kantipur (Nepali)                               | भारतद्वारा पीसीआर किट सहयोग                                                   |
| 2020-06-17                       | Online Khabar (Nepali)                          | भारतबाट आउनेको चाप घट्यो, तर सीमामा अझै हुन्न परीक्षण                         |
| 2020-08-07                       | Online Khabar (Nepali)                          | भारतबाट आएकाहरु सोझै घर जान थाले                                              |
| 2020-03-06                       | Kantipur (Nepali)                               | भारतबाट गरिने चिनियाँ सामग्री आयात घट्यो                                      |
| 2020-06-08                       | Kantipur (Nepali)                               | भारतबाट घर फर्कनै सास्ती                                                      |
| 2020-06-09                       | Kantipur (Nepali)                               | भारतबाट फर्किए साढे ७ लाख                                                     |
| 2020-05-31                       | Kantipur (Nepali)                               | भारतबाट भित्रिएकालाई सेनाले घर पठाउने                                         |

| Date of publication (yyyy/mm/dd) | Name of news media (select from drop-down menu) | Title of news/headline                                                                                                     |
|----------------------------------|-------------------------------------------------|----------------------------------------------------------------------------------------------------------------------------|
| 2020-05-12                       | Online Khabar (Nepali)                          | भारतबाट रातारात सीमामा ल्याइन्छन् नेपाली मजदुर                                                                             |
| 2020-03-30                       | Online Khabar (Nepali)                          | भारतबाट लाख बढी भित्रिए, हजार पनि छैनन् कारेन्टाइनमा                                                                       |
| 2020-05-23                       | Online Khabar (Nepali)                          | भारतबाट समूहमा आएका थिए सुर्खेतका ३ जना कोरोना संक्रमित                                                                    |
| 2020-05-12                       | Online Khabar (Nepali)                          | भारतमा कारेन्टाइनमा बसेका दुई सय ४२ लाई नेपाल ल्याइयो                                                                      |
| 2020-07-19                       | Kantipur (Nepali)                               | भारतमा नेपाली कामदारको बिचल्ली                                                                                             |
| 2020-04-30                       | Online Khabar (Nepali)                          | भारतमा रोकिएका नेपालीको बिहानैदेखि धमाधम उद्धार                                                                            |
| 2020-08-10                       | Kantipur (Nepali)                               | भारतमा रोजगारी गुमेपछि गुजारा मुस्किल                                                                                      |
| 2020-08-10                       | Kantipur (Nepali)                               | भारतीय सेनाद्वारा १० भन्टिलेटर सहयोग                                                                                       |
| 2020-06-21                       | Kantipur (Nepali)                               | भीटीएम नहुँदा संकलन रोकियो                                                                                                 |
| 2020-05-27                       | Kantipur (Nepali)                               | भीटीएम सकिँदै, स्वाब संकलन सुस्त                                                                                           |
| 2020-06-11                       | Kantipur (Nepali)                               | भीड कम गर्ने उपाय                                                                                                          |
| 2020-06-26                       | Kantipur (Nepali)                               | भीड कम गर्ने तरिका                                                                                                         |
| 2020-05-18                       | Kantipur (Nepali)                               | भीडभाडले संक्रमण फैलियो                                                                                                    |
| 2020-08-31                       | Online Khabar (Nepali)                          | भीम अस्पतालमा आईसीयू सञ्चालन                                                                                               |
| 2020-08-21                       | Online Khabar (Nepali)                          | भुल्के मोडल सिकाउने मन्त्री विराटनगरमा निरीह !                                                                             |
| 2020-05-07                       | Online Khabar (Nepali)                          | भुल्केमा थप ३३५ जनाको स्वाब संकलन                                                                                          |
| 2020-08-25                       | Online Khabar (Nepali)                          | भन्टिलेटर र आईसीयूका लागि प्रत्येक प्रदेशलाई २ करोड                                                                        |
| 2020-08-10                       | Online Khabar (Nepali)                          | भन्टिलेटरको अभावमै गुम्छ जीवन                                                                                              |
| 2020-05-19                       | Kantipur (Nepali)                               | भेरी-बबईमा दुई अर्बको ठेक्का रद्द                                                                                          |
| 2020-06-24                       | Kantipur (Nepali)                               | भैरहवाबाट भन्सार कारोबार बढ्यो                                                                                             |
| 2020-04-13                       | Online Khabar (Nepali)                          | भोलिदेखि वीरगञ्जमै कोरोना परीक्षण हुन्छ : मुख्यमन्त्री राउत<br>भोलिदेखि वीरगञ्जमै कोरोना परीक्षण हुन्छ : मुख्यमन्त्री राउत |
| 2020-05-20                       | Kantipur (Nepali)                               | म थाकिसकेँ                                                                                                                 |
| 2020-08-09                       | Online Khabar (Nepali)                          | मकवानपुरको बजार क्षेत्रमा सोमबार रातिदेखि निषेधाज्ञा                                                                       |
| 2020-08-31                       | Online Khabar (Nepali)                          | मकवानपुरमा निषेधाज्ञा हट्यो, विहान १० बजेसम्म बजार खुल्ने                                                                  |
| 2020-08-28                       | Online Khabar (Nepali)                          | मकवानपुरमा निषेधाज्ञाको स्वरूप परिवर्तन गरिने                                                                              |
| 2020-05-10                       | Kantipur (Nepali)                               | मजदुर-मालिक सहमति खोज्न डाकियो बैठक                                                                                        |
| 2020-05-04                       | Kantipur (Nepali)                               | मजदुरलाई सधैं हेला                                                                                                         |
| 2020-06-05                       | Kantipur (Nepali)                               | मजदुरले कहिले पाउँछन् पैसा?                                                                                                |
| 2020-05-02                       | Kantipur (Nepali)                               | मजदुरले चैतकै तलब पाएनन्                                                                                                   |
| 2020-04-30                       | Online Khabar (Nepali)                          | मध्य तराईमा संक्रमितको संख्या बढेपछि पीसीआर परीक्षणमा तीव्रता                                                              |
| 2020-03-20                       | Kantipur (Nepali)                               | मध्यपुरमा ५० शय्याको कारेन्टाइन                                                                                            |
| 2020-06-04                       | Kantipur (Nepali)                               | मध्यम वर्ग डिप्रेसनमा                                                                                                      |
| 2020-05-28                       | Kantipur (Nepali)                               | मध्यम व्यवसायमा आईएफसीले सघाउने                                                                                            |
| 2020-08-26                       | Online Khabar (Nepali)                          | मनाङका स्वास्थ्य प्रमुखलाई नै संक्रमण, जिल्ला अस्पताल सिल                                                                  |
| 2020-08-30                       | Online Khabar (Nepali)                          | मन्त्रालयको निर्देशन विपरीत विद्यालयमा आइसोलेसन                                                                            |
| 2020-06-24                       | Kantipur (Nepali)                               | मन्त्रालयले पठाएको किट काम लागेन                                                                                           |
| 2020-05-23                       | Kantipur (Nepali)                               | मन्त्रालयले माग्यो थप ९ अर्ब                                                                                               |
| 2020-05-02                       | Kantipur (Nepali)                               | मरकले राजालाई पनि छोडेन                                                                                                    |
| 2020-08-16                       | Kantipur (Nepali)                               | मरेपछि नागरिक देख्ने सरकार                                                                                                 |
| 2020-06-29                       | Kantipur (Nepali)                               | मल न मजदुर                                                                                                                 |
| 2020-06-13                       | Kantipur (Nepali)                               | मलका लागि भौतारिँदै किसान                                                                                                  |
| 2020-05-22                       | Kantipur (Nepali)                               | मलर सदाको भोक                                                                                                              |
| 2020-06-19                       | Kantipur (Nepali)                               | मलेसियाबाट कामदार ल्याउन सुरु                                                                                              |

| Date of publication (yyyy/mm/dd) | Name of news media (select from drop-down menu) | Title of news/headline                                                               |
|----------------------------------|-------------------------------------------------|--------------------------------------------------------------------------------------|
| 2020-04-29                       | Kantipur (Nepali)                               | महाकाली तरेर भारत गएका चार नेपाली नियन्त्रणमा                                        |
| 2020-06-06                       | Kantipur (Nepali)                               | महानगरले बनायो छानबिन समिति                                                          |
| 2020-03-13                       | Kantipur (Nepali)                               | महामारी घोषणासँगै सतर्कता बढाइयो                                                     |
| 2020-08-02                       | Kantipur (Nepali)                               | महामारी नियन्त्रणबाहिर                                                               |
| 2020-08-19                       | Online Khabar (Nepali)                          | महामारी नियन्त्रणमा असहयोग गर्ने स्वास्थ्य संस्थाविरुद्ध अदालत जाने सरकारको तयारी    |
| 2020-05-04                       | Kantipur (Nepali)                               | महामारीको लैंगिक पाटो                                                                |
| 2020-08-19                       | Kantipur (Nepali)                               | महामारीको विभाजन रेखा                                                                |
| 2020-08-30                       | Kantipur (Nepali)                               | महामारीमा अनुशासनहीन राजनीतिक संस्कार !                                              |
| 2020-06-13                       | Kantipur (Nepali)                               | महामारीमा आदिवासी                                                                    |
| 2020-08-28                       | Kantipur (Nepali)                               | महामारीमा चुनावको झल्को !                                                            |
| 2020-08-20                       | Kantipur (Nepali)                               | महामारीमा तीजको सन्देश                                                               |
| 2020-05-02                       | Kantipur (Nepali)                               | महामारीमा नेपाली राजनीतिको रहस्यवाद                                                  |
| 2020-06-25                       | Kantipur (Nepali)                               | महामारीमा मानसिक स्वास्थ्य                                                           |
| 2020-05-03                       | Kantipur (Nepali)                               | महामारीमा स्थानीय सरकारसँग अपेक्षा                                                   |
| 2020-07-27                       | Kantipur (Nepali)                               | महामारीले जाँच्दै छ शासकहरूको योग्यता                                                |
| 2020-06-21                       | Kantipur (Nepali)                               | महामारीले पनि नसिकाएको पाठ !                                                         |
| 2020-05-06                       | Kantipur (Nepali)                               | महिन्द्राको घरमै सेवा                                                                |
| 2020-05-18                       | Kantipur (Nepali)                               | महिला ओझेलमा परे                                                                     |
| 2020-06-17                       | Online Khabar (Nepali)                          | महोत्तरीको समसी गाउँपालिका ७२ घण्टाका लागि सिल                                       |
| 2020-05-21                       | Kantipur (Nepali)                               | मानव विकास वृद्धिमा ३० वर्षयताकै कमी आउन सक्छ : यूएनडीपी                             |
| 2020-05-30                       | Kantipur (Nepali)                               | मानव सभ्यतामाथि बजेको 'साइरन' !                                                      |
| 2020-07-16                       | Kantipur (Nepali)                               | मानसिक तनाव भोग्दै स्वास्थ्यकर्मी                                                    |
| 2020-07-05                       | Kantipur (Nepali)                               | मानसिक समस्या खुलेर भनौं                                                             |
| 2020-08-23                       | Kantipur (Nepali)                               | मानिसलाई विषादी छर्किनु अनुचित                                                       |
| 2020-08-03                       | Kantipur (Nepali)                               | मास्क अनिवार्य                                                                       |
| 2020-07-06                       | Online Khabar (Nepali)                          | मास्क नलगाई घरबाहिर निस्किए प्रहरीले पक्राउ गर्ने                                    |
| 2020-07-07                       | Kantipur (Nepali)                               | मास्क नलगाई निस्किए पक्राउ                                                           |
| 2020-08-17                       | Online Khabar (Nepali)                          | मास्क नलगाउनेलाई कारबाही गर्न खोज्दा प्रहरीमाथि नै कुटपिट                            |
| 2020-07-10                       | Kantipur (Nepali)                               | मास्क नलगाए जरिवाना                                                                  |
| 2020-03-10                       | Kantipur (Nepali)                               | मास्क निःशुल्क वितरण                                                                 |
| 2020-05-03                       | Kantipur (Nepali)                               | मास्क बनाउने उद्योगलाई भ्याइनभ्याइ                                                   |
| 2020-08-22                       | Kantipur (Nepali)                               | मास्क लगाइरहेको मार्क्सवाद                                                           |
| 2020-07-03                       | Kantipur (Nepali)                               | मास्क लगाए पनि असुरक्षित                                                             |
| 2020-06-19                       | Kantipur (Nepali)                               | मास्क लाउनै मुस्किल                                                                  |
| 2020-08-07                       | Kantipur (Nepali)                               | मास्कको मूल्य कति ?                                                                  |
| 2020-02-28                       | Kantipur (Nepali)                               | मास्कमा मनपरी गर्नेलाई छैन नियमन                                                     |
| 2020-08-09                       | Online Khabar (Nepali)                          | मुख्यमन्त्री राउतले भेटे उपप्रधानमन्त्री, कोरोना रोकथामको विशेष प्याकेज ल्याउन आग्रह |
| 2020-05-09                       | Online Khabar (Nepali)                          | मुम्बईबाट लुकिछिपी आएका थिए कपिलवस्तुका संक्रमित                                     |
| 2020-05-24                       | Kantipur (Nepali)                               | मुलुक फर्किनेको जमुनाहामा धुइरो                                                      |
| 2020-07-10                       | Kantipur (Nepali)                               | मेरुदण्डको स्याहार                                                                   |

| Date of publication (yyyy/mm/dd) | Name of news media (select from drop-down menu) | Title of news/headline                                                |
|----------------------------------|-------------------------------------------------|-----------------------------------------------------------------------|
| 2020-08-30                       | Online Khabar (Nepali)                          | मेहतर उत्थान समाजले दियो अति विपन्नलाई राहत सामग्री                   |
| 2020-06-17                       | Kantipur (Nepali)                               | मै खाऊँ, मै लाऊँ, मरिरहून् जनता !                                     |
| 2020-06-14                       | Kantipur (Nepali)                               | मोटरसाइकलमा एक जना मात्रै : अव्यावहारिक र औचित्यहीन                   |
| 2020-03-21                       | Kantipur (Nepali)                               | मोटरसाइकलमै सामान ढुवानी                                              |
| 2020-08-07                       | Kantipur (Nepali)                               | मोटोपना घटाए जोखिम कम                                                 |
| 2020-08-09                       | Online Khabar (Nepali)                          | मोरङका १० स्थानीय तहमा लकडाउन                                         |
| 2020-04-17                       | Online Khabar (Nepali)                          | मोरङकी युवतीमा देखियो कोरोना एन्टीबडी पोजेटिभ                         |
| 2020-03-12                       | Online Khabar (Nepali)                          | मोरङको टाँडी र सुनसरीको श्रीलंका टप्पुमा कारेन्टाइन                   |
| 2020-07-14                       | Kantipur (Nepali)                               | मौद्रिक नीतिले लिनुपर्ने नीति                                         |
| 2020-05-05                       | Kantipur (Nepali)                               | यथास्थितिमा 'खुकुलो पार्दा जोखिम'                                     |
| 2020-06-17                       | Kantipur (Nepali)                               | यसकारण वैकल्पिक सिकाइ प्रणाली                                         |
| 2020-06-14                       | Kantipur (Nepali)                               | यसरी खुल्दै छन् कार्यालय                                              |
| 2020-05-11                       | Kantipur (Nepali)                               | यसरी लडौँ कोरोनासँग                                                   |
| 2020-06-07                       | Kantipur (Nepali)                               | यात्रु चार्टर उडानमा रोक                                              |
| 2020-08-11                       | Kantipur (Nepali)                               | यात्रु बोकेर भित्रिन्छन् एम्बुलेन्स                                   |
| 2020-07-09                       | Kantipur (Nepali)                               | युनिलिभरले ल्यायो राहत                                                |
| 2020-05-19                       | Kantipur (Nepali)                               | युवालाई नगरको बिनाधितो स्वरोजगार कर्जा                                |
| 2020-06-10                       | Kantipur (Nepali)                               | यूएनडीपीले सुरु गर्‍यो जीविकोपार्जन पुनरुत्थान कार्यक्रम              |
| 2020-06-04                       | Kantipur (Nepali)                               | यो देश मजदुरको होइन रहेछ !                                            |
| 2020-07-06                       | Kantipur (Nepali)                               | यो विषाक्त मौनताले सबैलाई पिरोल्नेछ                                   |
| 2020-05-24                       | Kantipur (Nepali)                               | यो समय कृषिको पनि हो                                                  |
| 2020-05-10                       | Kantipur (Nepali)                               | योजनाबद्ध कृषि व्यवसाय जरुरी                                          |
| 2020-03-13                       | Kantipur (Nepali)                               | रक्तदानमा सचेत हुन अपिल                                               |
| 2020-03-15                       | Kantipur (Nepali)                               | रगत जुटाउनै हम्मे                                                     |
| 2020-03-02                       | Kantipur (Nepali)                               | रसुवागढी सुनसान                                                       |
| 2020-05-15                       | Kantipur (Nepali)                               | राजधानी छिर्ने नाकामा सेना खटाउन सिफारिस                              |
| 2020-07-05                       | Kantipur (Nepali)                               | राजधानी संक्रमणको उच्च जोखिममा                                        |
| 2020-08-23                       | Kantipur (Nepali)                               | राजधानीमा आगामी साताबाट संक्रमण घट्ने विश्वासको दाबी                  |
| 2020-07-22                       | Online Khabar (Nepali)                          | राजविराजमा अनिश्चितकालका लागि निषेधाज्ञा                              |
| 2020-05-05                       | Kantipur (Nepali)                               | राजस्व कम भएपछि ऋण र सहायतामा जोड                                     |
| 2020-05-12                       | Kantipur (Nepali)                               | रातारात दशगजामा ल्याएर छाडिन्छ                                        |
| 2020-08-21                       | Online Khabar (Nepali)                          | राति १२ बजेदेखि बिहान ९ बजेसम्म कालीमाटी र बल्खु तरकारी बजार खुल्ने   |
| 2020-06-10                       | Kantipur (Nepali)                               | राधादेवीहरूको चीत्कार कसले सुन्ला?                                    |
| 2020-04-25                       | Online Khabar (Nepali)                          | राप्ती स्वास्थ्य प्रतिष्ठानमा पीसीआर परीक्षण सुरु                     |
| 2020-05-20                       | Online Khabar (Nepali)                          | राप्ती स्वास्थ्य विज्ञान प्रतिष्ठानको ओपीडी बन्द गर्ने निर्णयको विरोध |
| 2020-05-20                       | Online Khabar (Nepali)                          | राप्ती स्वास्थ्य विज्ञान प्रतिष्ठानमा पनि कोरोनाको उपचार, ओपीडी बन्द  |
| 2020-04-10                       | Online Khabar (Nepali)                          | रामेछापका सबै स्थानीय तहमा कोरोना रोकथाम कोष                          |
| 2020-04-14                       | Online Khabar (Nepali)                          | रामेछापमा र्यापिड टेस्ट सुरु, पहिलो रिपोर्ट नेगेटिभ                   |
| 2020-08-11                       | Kantipur (Nepali)                               | राहत खोज्?                                                            |
| 2020-05-06                       | Kantipur (Nepali)                               | राहत प्याकेज ल्याउन सुझाव                                             |
| 2020-05-21                       | Kantipur (Nepali)                               | राहतको खोजीमा 'राइडर'                                                 |
| 2020-06-19                       | Kantipur (Nepali)                               | राहतको साटो काम                                                       |
| 2020-05-18                       | Kantipur (Nepali)                               | राहतमा भेदभाव नगर्नु                                                  |

| Date of publication (yyyy/mm/dd) | Name of news media (select from drop-down menu) | Title of news/headline                                                               |
|----------------------------------|-------------------------------------------------|--------------------------------------------------------------------------------------|
| 2020-05-21                       | Kantipur (Nepali)                               | रिचार्जरको कम मूल्यमै मास्क                                                          |
| 2020-06-17                       | Kantipur (Nepali)                               | रित्तै सरकारी खाद्य भण्डारण                                                          |
| 2020-06-14                       | Kantipur (Nepali)                               | रिपोर्ट नआएपछि प्रहरीमाथि ढुंगामुढा                                                  |
| 2020-06-15                       | Kantipur (Nepali)                               | रिपोर्ट माग्दा प्रहरीको लाठी                                                         |
| 2020-02-07                       | Kantipur (Nepali)                               | रुघाखोकी बिरामीको र्यालको नमुना काठमाडौं पठाइयो                                      |
| 2020-08-23                       | Online Khabar (Nepali)                          | रुपन्देहीमा भदौ १४ सम्म निषेधाज्ञा थपियो                                             |
| 2020-08-30                       | Online Khabar (Nepali)                          | रुपन्देहीमा भदौ २० सम्म निषेधाज्ञा                                                   |
| 2020-08-30                       | Online Khabar (Nepali)                          | रुपन्देहीमा भदौ २० सम्म निषेधाज्ञा सिफारिस                                           |
| 2020-08-18                       | Online Khabar (Nepali)                          | रुपन्देहीमा भदौ ७ सम्म निषेधाज्ञा                                                    |
| 2020-08-16                       | Online Khabar (Nepali)                          | रुपन्देहीस्थित नेपाल आयल निगमका १० कर्मचारीमा कोरोना                                 |
| 2020-05-13                       | Kantipur (Nepali)                               | रूपन्देहीका पहिलो संक्रमित डिस्चार्ज                                                 |
| 2020-08-18                       | Kantipur (Nepali)                               | रेमडेसिभिरमा कालोबजारी                                                               |
| 2020-08-25                       | Kantipur (Nepali)                               | रेमिट्यान्समा देखिएन कोरोना प्रभाव                                                   |
| 2020-04-30                       | Online Khabar (Nepali)                          | रेमिट्यान्समा धक्का : एकै वर्ष १ खर्ब ६३ अर्ब घट्ने                                  |
| 2020-05-03                       | Kantipur (Nepali)                               | रेलमार्गमा पनि काम निरन्तर                                                           |
| 2020-05-10                       | Online Khabar (Nepali)                          | रोकिएन सीमाबाट नेपाल प्रवेश गर्ने क्रम                                               |
| 2020-04-27                       | Kantipur (Nepali)                               | रोकियो यार्चागुम्बु संकलन                                                            |
| 2020-06-01                       | Kantipur (Nepali)                               | रोगको भन्दा भोकको डर                                                                 |
| 2020-08-30                       | Kantipur (Nepali)                               | रोगभन्दा भोकको पीर                                                                   |
| 2020-06-20                       | Kantipur (Nepali)                               | रोजगारी र पढाइमा विदेश जान खुला                                                      |
| 2020-07-03                       | Online Khabar (Nepali)                          | रोल्पामा आत्महत्या गरेका युवकमा कोरोना संक्रमण पुष्टि                                |
| 2020-08-26                       | Online Khabar (Nepali)                          | रौतहटमा एक घर एक परिक्षण अभियान                                                      |
| 2020-08-23                       | Online Khabar (Nepali)                          | रौतहटमा निषेधाज्ञा एक साता थप                                                        |
| 2020-08-05                       | Online Khabar (Nepali)                          | रौतहटमा शनिबारदेखि निषेधाज्ञा                                                        |
| 2020-04-16                       | Online Khabar (Nepali)                          | र्यापिड टेस्ट नेगेटिभ आउँदैनमा कोरोना संक्रमण छैन भन्न मिल्दैन : स्वास्थ्य मन्त्रालय |
| 2020-04-13                       | Online Khabar (Nepali)                          | र्यापिड टेस्टले दुर्घटना त निम्त्याइरहेको छैन ?                                      |
| 2020-04-15                       | Online Khabar (Nepali)                          | र्यापिडमा पोजेटिभ, पीसीआरमा नेगेटिभ : कोरोना सर्दैन, सारिसकेको हुन सक्छ              |
| 2020-05-17                       | Kantipur (Nepali)                               | लकडाउन : अख्तियारलाई निदाउने राम्रो बहाना                                            |
| 2020-05-18                       | Kantipur (Nepali)                               | लकडाउन १५ दिन लम्बियो                                                                |
| 2020-05-04                       | Kantipur (Nepali)                               | लकडाउन कसरी खोल्ने?                                                                  |
| 2020-06-01                       | Kantipur (Nepali)                               | लकडाउन कहिलेसम्म?                                                                    |
| 2020-05-04                       | Kantipur (Nepali)                               | लकडाउन खुकुलिँदा विकास निर्माण सुरु                                                  |
| 2020-05-06                       | Kantipur (Nepali)                               | लकडाउन खुकुलो पारे जोखिम : सरकार                                                     |
| 2020-05-05                       | Kantipur (Nepali)                               | लकडाउन खुकुलो पार्ने तयारी                                                           |
| 2020-04-30                       | Kantipur (Nepali)                               | लकडाउन खुकुलो बनाउन मोडालिटी बन्दै                                                   |
| 2020-06-09                       | Kantipur (Nepali)                               | लकडाउन खुकुलो बनाउने गृहकार्य अन्तिम चरणमा                                           |
| 2020-06-05                       | Kantipur (Nepali)                               | लकडाउन खुकुलो बनाउने तीन ढाँचा                                                       |
| 2020-06-16                       | Kantipur (Nepali)                               | लकडाउन खुलेको ३० दिनपछि कर बुझाउने आदेशकै निरन्तरता                                  |
| 2020-07-23                       | Kantipur (Nepali)                               | लकडाउन खुल्यो, जोखिम बढ्यो                                                           |
| 2020-06-11                       | Kantipur (Nepali)                               | लकडाउन खुकुलो, एसईई नहुने                                                            |
| 2020-07-12                       | Kantipur (Nepali)                               | लकडाउन छ कि छैन?                                                                     |
| 2020-06-03                       | Kantipur (Nepali)                               | लकडाउन जिन्दगी                                                                       |

| Date of publication (yyyy/mm/dd) | Name of news media (select from drop-down menu) | Title of news/headline                                                           |
|----------------------------------|-------------------------------------------------|----------------------------------------------------------------------------------|
| 2020-05-31                       | Kantipur (Nepali)                               | लकडाउन जेठ ३२ सम्म                                                               |
| 2020-05-07                       | Kantipur (Nepali)                               | लकडाउन जेठ ५ सम्म                                                                |
| 2020-05-06                       | Online Khabar (Nepali)                          | लकडाउन जेठ ५ सम्म लम्ब्याइयो, विकास निर्माण र उद्योग सशर्त खुला                  |
| 2020-05-15                       | Online Khabar (Nepali)                          | लकडाउन थप्ने सरकारको तयारी, जनस्वास्थ्य विज्ञहरुसँग छलफल                         |
| 2020-05-11                       | Kantipur (Nepali)                               | लकडाउन पालना भएन                                                                 |
| 2020-06-01                       | Kantipur (Nepali)                               | लकडाउन पुनर्विचार गर्न निजी क्षेत्रको माग                                        |
| 2020-05-25                       | Kantipur (Nepali)                               | लकडाउन रहिरहे आर्थिक वृद्धि ऋणात्मक                                              |
| 2020-05-23                       | Kantipur (Nepali)                               | लकडाउन लम्ब्याउँदैमा आयातित केस रोक्न सक्दैनौं                                   |
| 2020-04-27                       | Kantipur (Nepali)                               | लकडाउन वैशाख २५ सम्म                                                             |
| 2020-06-07                       | Kantipur (Nepali)                               | लकडाउन सजिलो बनाऊ                                                                |
| 2020-05-18                       | Kantipur (Nepali)                               | लकडाउन सत्ताकवच बन्नु हुँदैन                                                     |
| 2020-06-12                       | Kantipur (Nepali)                               | लकडाउन सहज बनाइएको हो, कोरोनाकाल सकिएको होइन                                     |
| 2020-05-12                       | Online Khabar (Nepali)                          | लकडाउनका बेला भारतबाट आएका थिए कपिलवस्तुका १० संक्रमित                           |
| 2020-06-10                       | Kantipur (Nepali)                               | लकडाउनको ओझेलमा महिला हिंसा                                                      |
| 2020-06-02                       | Kantipur (Nepali)                               | लकडाउनको ढाँचा फेरने तयारी                                                       |
| 2020-05-27                       | Kantipur (Nepali)                               | लकडाउनको स्वरूप फेरौं                                                            |
| 2020-06-04                       | Kantipur (Nepali)                               | लकडाउनको स्वरूप फेरौं, परीक्षण बढाऔं                                             |
| 2020-06-10                       | Kantipur (Nepali)                               | लकडाउनपछि ९५ जनाको हत्या                                                         |
| 2020-06-20                       | Kantipur (Nepali)                               | लकडाउनपछि एक दिन                                                                 |
| 2020-05-24                       | Kantipur (Nepali)                               | लकडाउनपछि पूर्वाधारमा ६५ खर्च                                                    |
| 2020-05-03                       | Kantipur (Nepali)                               | लकडाउनमा १८ हजार सवारी नियन्त्रणमा                                               |
| 2020-08-06                       | Kantipur (Nepali)                               | लकडाउनमा ६१ प्रतिशत उद्योग बन्द                                                  |
| 2020-05-31                       | Kantipur (Nepali)                               | लकडाउनमा आत्महत्या दर बढ्दै                                                      |
| 2020-07-30                       | Kantipur (Nepali)                               | लकडाउनमा आत्महत्या र यसले उब्जाएका प्रश्न                                        |
| 2020-08-05                       | Online Khabar (Nepali)                          | लकडाउनमा एक चौथाइ कर्मचारीले रोजगारी गुमाए, सबैभन्दा धेरै होटल क्षेत्रका         |
| 2020-05-07                       | Kantipur (Nepali)                               | लकडाउनमा कसरी चल्छ संसद् ?                                                       |
| 2020-07-19                       | Kantipur (Nepali)                               | लकडाउनमा कौसी खेती                                                               |
| 2020-05-07                       | Kantipur (Nepali)                               | लकडाउनमा खेलाडी                                                                  |
| 2020-03-25                       | Online Khabar (Nepali)                          | लकडाउनमा जनताबाट सरकारले गरेको अपेक्षा के हो ? (प्रदीप ज्ञवालीसँग भिडियो वार्ता) |
| 2020-05-11                       | Kantipur (Nepali)                               | लकडाउनमा थपियो ९१ अर्ब निक्षेप                                                   |
| 2020-08-26                       | Kantipur (Nepali)                               | लकडाउनमा पनि केही आयोजनाको उल्लेख्य प्रगति                                       |
| 2020-05-05                       | Kantipur (Nepali)                               | लकडाउनमा राजनीतिक नौटंकी                                                         |
| 2020-06-18                       | Kantipur (Nepali)                               | लकडाउनमा लिए सांसदले सवारी भत्ता                                                 |
| 2020-05-18                       | Kantipur (Nepali)                               | लकडाउनमा लिसेन्कोको सम्झना                                                       |
| 2020-06-14                       | Kantipur (Nepali)                               | लकडाउनमा लुलो सरकार                                                              |
| 2020-05-21                       | Kantipur (Nepali)                               | लकडाउनमा शुल्क बुझाउन ताकेता                                                     |
| 2020-05-20                       | Kantipur (Nepali)                               | लकडाउनमा सवारी बिमा शुल्क छुट                                                    |
| 2020-05-31                       | Kantipur (Nepali)                               | लकडाउनमात्रै समाधान होइन                                                         |
| 2020-06-03                       | Kantipur (Nepali)                               | लकडाउनमै कर तिर्न ताकेता                                                         |
| 2020-07-23                       | Online Khabar (Nepali)                          | लकडाउनयता तीन सय शिक्षकको गयो जागिर                                              |
| 2020-05-05                       | Kantipur (Nepali)                               | लकडाउनले अर्थतन्त्र ठप्प                                                         |



| Date of publication (yyyy/mm/dd) | Name of news media (select from drop-down menu) | Title of news/headline                                                                       |
|----------------------------------|-------------------------------------------------|----------------------------------------------------------------------------------------------|
| 2020-06-04                       | Kantipur (Nepali)                               | लकडाउनले आजित व्यवसायी                                                                       |
| 2020-04-17                       | Online Khabar (Nepali)                          | लकडाउनले उपचार पनि महँगो हुँदोरहेछ ...                                                       |
| 2020-05-27                       | Kantipur (Nepali)                               | लकडाउनले खुम्च्यायो लगानी                                                                    |
| 2020-06-04                       | Kantipur (Nepali)                               | लकडाउनले गाँसे खोसिदियो                                                                      |
| 2020-06-04                       | Kantipur (Nepali)                               | लकडाउनले ज्यान गुमाउँदै 'आमा' हरू                                                            |
| 2020-06-02                       | Kantipur (Nepali)                               | लकडाउनले निकास दिँदैन                                                                        |
| 2020-06-02                       | Kantipur (Nepali)                               | लकडाउनले बनायो मजदुरलाई 'माग्ने'                                                             |
| 2020-07-26                       | Kantipur (Nepali)                               | लकडाउनले बैंकको ४० अर्ब ब्याज उठेन                                                           |
| 2020-06-01                       | Kantipur (Nepali)                               | लकडाउनले बोटमै सुके फूल                                                                      |
| 2020-05-03                       | Kantipur (Nepali)                               | लकडाउनले मिर्गौला रोगी भोकभोकै                                                               |
| 2020-07-02                       | Kantipur (Nepali)                               | लकडाउनले रोकियो सेजको गति                                                                    |
| 2020-08-12                       | Kantipur (Nepali)                               | लक्षण देखिए पनि ३ दिनदेखि अस्पताल नपाएका संक्रमितको प्रश्न मरेपछि मात्रै रेस्पोज गर्नुहुन्छ? |
| 2020-07-10                       | Kantipur (Nepali)                               | लक्षण नदेखिएपछि परीक्षण ठप्प                                                                 |
| 2020-06-07                       | Kantipur (Nepali)                               | लक्षण नभएका संक्रमित घरकै आइसोलेसनमा                                                         |
| 2020-08-22                       | Kantipur (Nepali)                               | लक्षण भएका २५% संक्रमितलाई अक्सिजन जरुरी                                                     |
| 2020-08-04                       | Online Khabar (Nepali)                          | लक्षणसहितका संक्रमित देखिए एक महिना लकडाउन : मुख्यमन्त्री शाही                               |
| 2020-07-16                       | Kantipur (Nepali)                               | लक्ष्यको आधा राजस्व                                                                          |
| 2020-08-08                       | Kantipur (Nepali)                               | लघुवित्तको ऋणले थलिए गाउँ                                                                    |
| 2020-08-09                       | Kantipur (Nepali)                               | लघुवित्तको साहु अवतार                                                                        |
| 2020-06-07                       | Kantipur (Nepali)                               | लर्को उस्तै                                                                                  |
| 2020-05-13                       | Online Khabar (Nepali)                          | ललितपुरको आरोग्य फाउन्डेसन र निदान अस्पताल सिल                                               |
| 2020-05-07                       | Kantipur (Nepali)                               | लुकीछिपी छिर्न खोज्नेको सीमामा भीड                                                           |
| 2020-08-16                       | Online Khabar (Nepali)                          | लुकीछिपी नेपाल प्रवेश पूर्ण रुपमा बन्द गर्ने प्रयासमा छौं : गृहमन्त्री                       |
| 2020-05-24                       | Online Khabar (Nepali)                          | लुम्बिनी विकास कोषले कोरोना कोषलाई दियो १५ लाख                                               |
| 2020-08-12                       | Kantipur (Nepali)                               | लेबनानमा रोजगारी गुमाउँदै नेपाली                                                             |
| 2020-05-15                       | Online Khabar (Nepali)                          | वडाध्यक्षले दिल्लीबाट छोरालाई ल्याए, कारेन्टाइनमा राखेनन्                                    |
| 2020-08-10                       | Online Khabar (Nepali)                          | वडाले पसल बन्द गर्न भन्यो, व्यापारीले टेरेनन्                                                |
| 2020-02-13                       | Kantipur (Nepali)                               | वाइडबडी शनिबार वुहान उड्ने                                                                   |
| 2020-05-27                       | Kantipur (Nepali)                               | वाग्मती प्रदेशमा स्वास्थ्य र कृषिलाई प्राथमिकता                                              |
| 2020-03-15                       | Kantipur (Nepali)                               | वाग्मती सफाइमा जागरण अभियान                                                                  |
| 2020-07-17                       | Kantipur (Nepali)                               | वायुसेवाका १४ संक्रमित फेरि सोल्टीमै                                                         |
| 2020-08-28                       | Kantipur (Nepali)                               | विकल्प खोज्दै पार्टी प्यालेस व्यवसायी                                                        |
| 2020-06-25                       | Kantipur (Nepali)                               | विकल्पमा सुतीको मास्क                                                                        |
| 2020-05-12                       | Kantipur (Nepali)                               | विचार नगरी निर्णय                                                                            |
| 2020-05-03                       | Kantipur (Nepali)                               | विज्ञ भन्छन्- 'डिसइन्फेक्टेन्ट टनेल कामै छैन'                                                |
| 2020-05-04                       | Kantipur (Nepali)                               | विज्ञ भन्छन्- 'परीक्षण नबढाए लकडाउनको अर्थ छैन'                                              |
| 2020-06-04                       | Kantipur (Nepali)                               | विज्ञ भन्छन्- 'स्वास्थ्य संकटकालको हतारो नगरौं'                                              |
| 2020-05-30                       | Kantipur (Nepali)                               | विदेशबाट १० दिनभित्र २५ हजारलाई ल्याइने                                                      |
| 2020-05-12                       | Kantipur (Nepali)                               | विदेशबाट आउन चाहने झन्डै ६ लाख                                                               |
| 2020-07-20                       | Kantipur (Nepali)                               | विदेशबाट आउनेलाई पीसीआर अनिवार्य                                                             |
| 2020-06-28                       | Kantipur (Nepali)                               | विदेशबाट आउनेलाई सिधै घर                                                                     |

| Date of publication (yyyy/mm/dd) | Name of news media (select from drop-down menu) | Title of news/headline                                                        |
|----------------------------------|-------------------------------------------------|-------------------------------------------------------------------------------|
| 2020-06-03                       | Kantipur (Nepali)                               | विदेशबाट आएकालाई यसरी पुर्याइन्छ घर                                           |
| 2020-05-29                       | Online Khabar (Nepali)                          | विदेशबाट उद्धार गर्ने कार्ययोजना तयार, पैसा तिरेर होटल कारेन्टिनमा बस्न पाइने |
| 2020-08-24                       | Online Khabar (Nepali)                          | विदेशबाट उद्धार गरिने नेपालीलाई निशुल्क कारेन्टिनमा राख : सांसद संग्रौला      |
| 2020-05-31                       | Online Khabar (Nepali)                          | विदेशबाट उद्धार गरिनेको व्यवस्थापनमा सेना खटिने, १० दिनभित्र कारेन्टिन बनाइने |
| 2020-06-01                       | Kantipur (Nepali)                               | विदेशबाट नेपालीलाई उद्धार गर्न दिनमा १० उडान                                  |
| 2020-07-22                       | Kantipur (Nepali)                               | विदेशबाट फर्किनेलाई होम कारेन्टाइन !                                          |
| 2020-04-06                       | Online Khabar (Nepali)                          | विदेशबाट हेटौंडा आएका ११ सहित १७ जनाको रिपोर्ट नेगेटिभ                        |
| 2020-08-13                       | Online Khabar (Nepali)                          | विदेशमा अठेरामा परेका नेपालीको अधिकार संरक्षण गर : मानव अधिकार आयोग           |
| 2020-08-27                       | Online Khabar (Nepali)                          | विदेशमा अठेरामा परेकालाई विना भेदभाव उद्धार गर्नुपर्छ : एनआरएनए               |
| 2020-07-17                       | Online Khabar (Nepali)                          | विदेशमा अलपत्र परेकालाई अब सरकारी खर्चमा उद्धार गरिने                         |
| 2020-07-10                       | Kantipur (Nepali)                               | विदेशमा बिचल्ली                                                               |
| 2020-03-10                       | Kantipur (Nepali)                               | विदेशी ह्यान्ड गेटे                                                           |
| 2020-02-12                       | Kantipur (Nepali)                               | विद्यार्थीलाई चीनबाट शनिबार ल्याइने                                           |
| 2020-03-11                       | Kantipur (Nepali)                               | विद्यार्थीलाई मास्क                                                           |
| 2020-06-16                       | Kantipur (Nepali)                               | विद्यालय छिट्टै खुल्छन् : प्रधानमन्त्री                                       |
| 2020-05-24                       | Kantipur (Nepali)                               | विद्यालय शुल्क कसरी तिर्ने?                                                   |
| 2020-06-25                       | Kantipur (Nepali)                               | विद्यालयका कारेन्टिन हटाऊ                                                     |
| 2020-03-06                       | Kantipur (Nepali)                               | विद्युत् आयोजना बढी प्रभावित                                                  |
| 2020-06-07                       | Kantipur (Nepali)                               | विद्युत् प्राधिकरणलाई हतार                                                    |
| 2020-05-03                       | Kantipur (Nepali)                               | विपत्ता सामाजिक पूर्वाग्रह                                                    |
| 2020-03-29                       | Online Khabar (Nepali)                          | विपन्न परिवारलाई तिलोत्तमा नगरपालिकाको खाद्यान्न सहयोग                        |
| 2020-05-27                       | Kantipur (Nepali)                               | विपन्नलाई शुल्क लिएर परीक्षण नगराउनु : सर्वोच्च                               |
| 2020-03-02                       | Kantipur (Nepali)                               | विमानस्थलमा सबैको जाँच                                                        |
| 2020-03-11                       | Kantipur (Nepali)                               | विमानस्थलमा हेल्थ डेस्क                                                       |
| 2020-03-09                       | Kantipur (Nepali)                               | विमानस्थललाई चेम्बरको सहयोग                                                   |
| 2020-06-15                       | Kantipur (Nepali)                               | विराटनगर र बागलुङमा प्रदर्शन                                                  |
| 2020-08-10                       | Online Khabar (Nepali)                          | विराटनगरको एउटै वडामा ४७ संक्रमित, गुद्रीबजार सिल                             |
| 2020-04-29                       | Online Khabar (Nepali)                          | विराटनगरमा कोरोना अस्पतालको फोहोर कसरी गरिन्छ विसर्जन ?                       |
| 2020-08-28                       | Online Khabar (Nepali)                          | विराटनगरमा न्यूरो अस्पतालले सुरु गर्‍यो कोभिड उपचार                           |
| 2020-08-02                       | Kantipur (Nepali)                               | विराटनगरमा परीक्षण बढाइयो                                                     |
| 2020-07-31                       | Online Khabar (Nepali)                          | विराटनगरमा फेरि दुई साता लकडाउन                                               |
| 2020-08-24                       | Online Khabar (Nepali)                          | विराटनगरले किन्यो पीसीआर मेसिन, मेयरले दिए एक वर्षको सुविधा                   |
| 2020-08-01                       | Online Khabar (Nepali)                          | विश्वेश्वरको आत्महत्या : कोरोनालाई जिते, गाउँ समाजसँग हारे !                  |
| 2020-06-12                       | Kantipur (Nepali)                               | विश्व बैंकको ४५ करोड डलर ऋण स्वीकृत                                           |
| 2020-07-19                       | Kantipur (Nepali)                               | विस्तारकारी नीतिको कार्यान्वयन पाटो                                           |
| 2020-04-11                       | Online Khabar (Nepali)                          | वीर अस्पतालमा पनि सुरु भयो कोरोना परीक्षण                                     |
| 2020-07-02                       | Kantipur (Nepali)                               | वीर, पाटन र शिक्षणमा सशुल्क पीसीआर परीक्षण                                    |
| 2020-07-27                       | Online Khabar (Nepali)                          | वीरगञ्ज टू राजविराज : कोरोनाको 'साङ्लो' बन्न नपाओस्                           |
| 2020-07-30                       | Online Khabar (Nepali)                          | वीरगञ्ज हेल्थ केयरलाई अस्थायी कोभिड अस्पताल बनाउन सिफारिस                     |
| 2020-05-21                       | Online Khabar (Nepali)                          | वीरगञ्जको गण्डक अस्पतालमा सुरु भयो कोरोना उपचार                               |

| Date of publication (yyyy/mm/dd) | Name of news media (select from drop-down menu) | Title of news/headline                                               |
|----------------------------------|-------------------------------------------------|----------------------------------------------------------------------|
| 2020-04-18                       | Online Khabar (Nepali)                          | वीरगञ्जको गण्डक अस्पताललाई कोभिड अस्पताल बनाइने                      |
| 2020-05-08                       | Online Khabar (Nepali)                          | वीरगञ्जको छपकैयामा थप २७२ जनाको थ्रोट स्वाब संकलन                    |
| 2020-07-25                       | Online Khabar (Nepali)                          | वीरगञ्जमा आजबाट अनिश्चितकालीन निषेधाज्ञा जारी                        |
| 2020-04-25                       | Online Khabar (Nepali)                          | वीरगञ्जमा उपचाररत ४ जनाको तेस्रो रिपोर्ट नेगेटिभ                     |
| 2020-04-12                       | Online Khabar (Nepali)                          | वीरगञ्जमा कोरोना परीक्षण ल्याब नहुनु दुःखद : सभापति खड्का            |
| 2020-05-04                       | Kantipur (Nepali)                               | वीरगञ्जमा एक संक्रमित थपिए                                           |
| 2020-08-10                       | Kantipur (Nepali)                               | वीरगञ्जलाई हेर                                                       |
| 2020-08-13                       | Online Khabar (Nepali)                          | वीरेन्द्रनगर नगरपालिका एक साता बन्द हुने                             |
| 2020-02-01                       | Kantipur (Nepali)                               | वुहानका विद्यार्थी फिर्ता ल्याउन माग गर्दै नेपालले चीनलाई पठायो पत्र |
| 2020-02-03                       | Online Khabar (Nepali)                          | वुहानबाट नेपालीको प्रश्न : सरकार ! हाम्रो मृत्यु पर्खिएको हो ?       |
| 2020-02-16                       | Kantipur (Nepali)                               | वुहानबाट फर्कने सोझै खरिपाटीमा                                       |
| 2020-03-11                       | Kantipur (Nepali)                               | वैदेशिक रोजगारीमा जाने घटे                                           |
| 2020-05-27                       | Kantipur (Nepali)                               | वैशाखमा ३९५ घट्यो रेमिट्यान्स                                        |
| 2020-07-02                       | Kantipur (Nepali)                               | व्यवसाय जोगाउन रेस्टुराँको होम डेलिभरी                               |
| 2020-05-10                       | Kantipur (Nepali)                               | व्यवसायीका समस्या समाधान गर्छौं                                      |
| 2020-08-12                       | Online Khabar (Nepali)                          | व्यवसायीलाई आफ्नै खर्चमा कोरोना परीक्षण गर्न सरकारको आग्रह           |
| 2020-03-22                       | Kantipur (Nepali)                               | शंका लागे ११८०                                                       |
| 2020-03-23                       | Kantipur (Nepali)                               | शंकास्पदलाई खोज्दै स्वास्थ्यकर्मी                                    |
| 2020-05-30                       | Kantipur (Nepali)                               | शक्ति सञ्चयका लागि सानो बजेट                                         |
| 2020-04-04                       | Online Khabar (Nepali)                          | शनिबारबाट चितवनमै कोरोना भाइरस परीक्षण सुरु गर्ने तयारी              |
| 2020-06-26                       | Kantipur (Nepali)                               | शव व्यवस्थापनमा सधैं किचलो                                           |
| 2020-05-15                       | Kantipur (Nepali)                               | शिक्षण अस्पतालका ४९ स्वास्थ्यकर्मी कारेन्टाइनमा                      |
| 2020-08-14                       | Online Khabar (Nepali)                          | शिक्षण अस्पतालका थप ४ जना स्वास्थ्यकर्मीमा संक्रमण                   |
| 2020-08-04                       | Kantipur (Nepali)                               | शिक्षण अस्पतालको सफलता                                               |
| 2020-05-17                       | Kantipur (Nepali)                               | शिक्षणमा छैन चिकित्सक बस्ने कारेन्टाइन                               |
| 2020-05-18                       | Kantipur (Nepali)                               | शिक्षणमा भद्रगोल                                                     |
| 2020-08-11                       | Kantipur (Nepali)                               | शिक्षा मन्त्रालयको अलमल                                              |
| 2020-05-27                       | Kantipur (Nepali)                               | शिक्षामा अनलाइन कक्षालाई प्राथमिकता                                  |
| 2020-05-10                       | Kantipur (Nepali)                               | शुल्क तिरेर डायलसिस                                                  |
| 2020-05-22                       | Kantipur (Nepali)                               | शुल्क लिएर परीक्षण नहोस्                                             |
| 2020-07-02                       | Kantipur (Nepali)                               | संकटबाट निस्कन अर्को बजेट विचार गरौं                                 |
| 2020-05-16                       | Kantipur (Nepali)                               | संकटमा नागरिकको सीमाबोध                                              |
| 2020-06-26                       | Kantipur (Nepali)                               | संकटमा निस्फिक्री सरकार                                              |
| 2020-07-16                       | Kantipur (Nepali)                               | संकटमा पनि असारै भुक्तानी सीमाभन्दा बढी                              |
| 2020-07-09                       | Kantipur (Nepali)                               | संकटमा यातायात व्यवसायी                                              |
| 2020-05-15                       | Kantipur (Nepali)                               | संकटमा सम्भावनाको घेरा                                               |
| 2020-08-25                       | Kantipur (Nepali)                               | संकटमाथि अचाक्ली मूल्यवृद्धि                                         |
| 2020-06-03                       | Kantipur (Nepali)                               | संकटसँग जुध्न छाडेर सुरुवा                                           |
| 2020-05-25                       | Kantipur (Nepali)                               | संक्रमण ४२ जिल्लामा                                                  |
| 2020-08-06                       | Kantipur (Nepali)                               | संक्रमण तीव्र भए भेटिलेटर र आईसीयू पुग्दैन                           |
| 2020-05-07                       | Kantipur (Nepali)                               | संक्रमण तेस्रो चरणमा तर टेसिङ पहिलो चरणमै                            |
| 2020-05-14                       | Kantipur (Nepali)                               | संक्रमण दोस्रो चरणमै : विज्ञ                                         |

| Date of publication (yyyy/mm/dd) | Name of news media (select from drop-down menu) | Title of news/headline                                         |
|----------------------------------|-------------------------------------------------|----------------------------------------------------------------|
| 2020-05-29                       | Kantipur (Nepali)                               | संक्रमण नियन्त्रण र उपचारमा प्राथमिकता                         |
| 2020-03-10                       | Kantipur (Nepali)                               | संक्रमण फैलिए कसरी थेप्ने?                                     |
| 2020-05-18                       | Kantipur (Nepali)                               | संक्रमण बढेसँगै विद्यार्थी अन्योलमा                            |
| 2020-08-11                       | Kantipur (Nepali)                               | संक्रमण बढ्दा आत्तिए प्रदेश र स्थानीय तह                       |
| 2020-07-03                       | Kantipur (Nepali)                               | संक्रमण बढ्दो                                                  |
| 2020-08-25                       | Kantipur (Nepali)                               | संक्रमण बढ्यो, टेसिड र टेस्टिड बढेन                            |
| 2020-06-09                       | Kantipur (Nepali)                               | संक्रमण र डरबीच पसल खोल्छन् व्यवसायी                           |
| 2020-06-09                       | Kantipur (Nepali)                               | संक्रमण रोक्न असफल : कांग्रेस                                  |
| 2020-05-26                       | Kantipur (Nepali)                               | संक्रमण रोक्न कठिन                                             |
| 2020-06-13                       | Kantipur (Nepali)                               | संक्रमणका हटस्पटको साक्षी हुँदा                                |
| 2020-05-14                       | Kantipur (Nepali)                               | संक्रमणको उच्च जोखिममा पुरुष                                   |
| 2020-08-25                       | Kantipur (Nepali)                               | संक्रमणको उच्च जोखिममा बालबालिका                               |
| 2020-06-29                       | Kantipur (Nepali)                               | संक्रमणको चपेटामा 'फ्रन्टलाइनर'                                |
| 2020-08-28                       | Online Khabar (Nepali)                          | संक्रमणको जोखिममा उपत्यका, निषेधाज्ञा लगाएर के गर्दैछ सरकार ?  |
| 2020-04-24                       | Kantipur (Nepali)                               | संक्रमणको जोखिममा कारागार                                      |
| 2020-05-21                       | Kantipur (Nepali)                               | संक्रमणको स्रोत कारेन्टिन                                      |
| 2020-05-03                       | Kantipur (Nepali)                               | संक्रमणपछि गाउँ र सीमामा विशेष निगरानी                         |
| 2020-02-15                       | Kantipur (Nepali)                               | संक्रमणबाट बच्न आयुर्वेद                                       |
| 2020-07-06                       | Kantipur (Nepali)                               | संक्रमणबीच अस्पताल कसरी चलाउने?                                |
| 2020-08-02                       | Kantipur (Nepali)                               | संक्रमणमुक्त हुँदा पनि छिःछिः                                  |
| 2020-05-24                       | Kantipur (Nepali)                               | संक्रमित ओसार्न फोहोर बोक्ने टूयाक्टर !                        |
| 2020-05-02                       | Kantipur (Nepali)                               | संक्रमित क्षेत्रकी गर्भवती अस्पतालबाट निकाला                   |
| 2020-05-15                       | Kantipur (Nepali)                               | संक्रमित क्षेत्रबाट आएका माथि छैन चासो                         |
| 2020-06-15                       | Kantipur (Nepali)                               | संक्रमित क्षेत्रबाट आकालाई बिनापरीक्षण फर्काउँदै               |
| 2020-06-10                       | Kantipur (Nepali)                               | संक्रमित गर्भवतीको शल्यक्रिया                                  |
| 2020-05-15                       | Kantipur (Nepali)                               | संक्रमित चढेको ट्रक खोजिँदै                                    |
| 2020-02-29                       | Kantipur (Nepali)                               | संक्रमित देशबाट निर्बाध नेपाल प्रवेश                           |
| 2020-06-05                       | Kantipur (Nepali)                               | संक्रमित बढेपछि कोरोना बिमा स्थगित                             |
| 2020-05-20                       | Kantipur (Nepali)                               | संक्रमित बसेकै कारेन्टाइनमा छैन परीक्षण                        |
| 2020-05-26                       | Online Khabar (Nepali)                          | संक्रमित भेटिनेवित्तिकै सिल नगर्न स्वास्थ्य मन्त्रालयको आग्रह  |
| 2020-05-31                       | Kantipur (Nepali)                               | संक्रमित रातभर अस्पतालबाहिरै                                   |
| 2020-08-28                       | Online Khabar (Nepali)                          | संक्रमित स्वास्थ्यकर्मीले नै गर्छन् कोरोनाका बिरामीको उपचार    |
| 2020-08-16                       | Online Khabar (Nepali)                          | संक्रमित हुँदा मैले ठूलो अपराध गरेजस्तो गरियो'                 |
| 2020-07-03                       | Kantipur (Nepali)                               | संक्रमितको अनुगमन भएन                                          |
| 2020-08-07                       | Online Khabar (Nepali)                          | संक्रमितको उपचार गर्न मन्त्रीकै फोर्स                          |
| 2020-04-07                       | Online Khabar (Nepali)                          | संक्रमितको उपचार गर्नेको ज्यान गए प्रदेश १ सरकारले ५० लाख दिने |
| 2020-08-04                       | Kantipur (Nepali)                               | संक्रमितको खाजामा कीरा                                         |
| 2020-05-22                       | Kantipur (Nepali)                               | संक्रमितको शव ओसार्नेलाई ५० हजार                               |
| 2020-06-01                       | Kantipur (Nepali)                               | संक्रमितलाई गोठमा राखियो                                       |
| 2020-08-30                       | Kantipur (Nepali)                               | संक्रमितलाई पाइलैपिच्छे सास्ती                                 |
| 2020-06-02                       | Kantipur (Nepali)                               | संक्रमितलाई लक्षण देखिए मात्रै अस्पताल                         |
| 2020-06-05                       | Kantipur (Nepali)                               | संक्रमितलाई 'विभेद' को डर                                      |
| 2020-08-30                       | Kantipur (Nepali)                               | संक्रमितलाई विभेद नगरौं                                        |

| Date of publication (yyyy/mm/dd) | Name of news media (select from drop-down menu) | Title of news/headline                                                   |
|----------------------------------|-------------------------------------------------|--------------------------------------------------------------------------|
| 2020-08-20                       | Kantipur (Nepali)                               | संक्रमितलाई वैकल्पिक उपचारको खोजी                                        |
| 2020-07-02                       | Kantipur (Nepali)                               | संक्रमितहरू विवाहदेखि वडा भेलासम्म                                       |
| 2020-04-28                       | Kantipur (Nepali)                               | संघको आस गर्दै प्रदेश                                                    |
| 2020-05-15                       | Kantipur (Nepali)                               | संघले दियो स्वास्थ्य सामग्री                                             |
| 2020-06-06                       | Kantipur (Nepali)                               | संयन्त्रै संयन्त्रले सकस                                                 |
| 2020-06-02                       | Online Khabar (Nepali)                          | संसदीय समितिको निर्देशन : कारेन्टिन मापदण्ड अनुसार सञ्चालन गर            |
| 2020-05-14                       | Online Khabar (Nepali)                          | संसदीय समितिको निर्देशन : स्वास्थ्य सामग्रीको यथाशीघ्र व्यवस्था गर       |
| 2020-06-18                       | Kantipur (Nepali)                               | संसद्मा कांग्रेसको ध्यानाकर्षण सूचना                                     |
| 2020-05-13                       | Kantipur (Nepali)                               | संसदलाई नै झूटो विवरण पेस                                                |
| 2020-06-26                       | Kantipur (Nepali)                               | सकसमा संक्रमित                                                           |
| 2020-05-31                       | Kantipur (Nepali)                               | सकिए परीक्षण किट                                                         |
| 2020-07-09                       | Kantipur (Nepali)                               | सचियामाको ह्यान्ड सेनिटाइजर                                              |
| 2020-05-27                       | Kantipur (Nepali)                               | सञ्चार क्षेत्रलाई राहत जरुरी'                                            |
| 2020-03-22                       | Kantipur (Nepali)                               | 'सञ्चारकर्मीलाई घरबाटै काम गर्ने व्यवस्था मिलाऊ'                         |
| 2020-05-06                       | Online Khabar (Nepali)                          | सडकमार्गबाटै मलेसिया पुर्याइयो किट, भोलि काठमाडौं आइपुग्ने               |
| 2020-04-25                       | Online Khabar (Nepali)                          | सडकमै बनाइयो स्वचालित स्यानिटाइजिङ स्टेसन                                |
| 2020-05-05                       | Online Khabar (Nepali)                          | सत्तारूढ सांसदको प्रश्न : कोरोनासँग लडनुपर्ने बेला सरकारको ध्यान कता छ ? |
| 2020-05-05                       | Kantipur (Nepali)                               | सत्यमोहनले देखेका दुई महामारी                                            |
| 2020-06-15                       | Kantipur (Nepali)                               | सपिङ मल सोमबारदेखि खुल्दै                                                |
| 2020-07-16                       | Kantipur (Nepali)                               | सपिङ मलमा भाडा विवाद चर्किँदै                                            |
| 2020-08-31                       | Online Khabar (Nepali)                          | सप्तरी र महोत्तरीमा एक साता लम्बियो निषेधाज्ञा                           |
| 2020-08-03                       | Online Khabar (Nepali)                          | सप्तरीमा ६ जना प्रहरीमा कोरोना संक्रमण पुष्टि                            |
| 2020-04-01                       | Online Khabar (Nepali)                          | सप्तरीमा पटनाबाट फर्किएका ८ जना कारेन्टाइनमा                             |
| 2020-08-18                       | Online Khabar (Nepali)                          | सप्तरीमा भदौ १५ गतेसम्म निषेधाज्ञा थप                                    |
| 2020-08-03                       | Online Khabar (Nepali)                          | सप्तरीमा मंगलबारदेखि निषेधाज्ञा                                          |
| 2020-06-08                       | Kantipur (Nepali)                               | सफाइकर्मीलाई क्रिएसनको राहत                                              |
| 2020-08-10                       | Online Khabar (Nepali)                          | सबै अस्पतालमा कोरोना संक्रमितलाई राख्ने तयारी                            |
| 2020-08-19                       | Kantipur (Nepali)                               | सबै अस्पतालमा कोरोनाको उपचार गर्नु उचित हो?                              |
| 2020-05-16                       | Kantipur (Nepali)                               | सबै अस्पतालमा महामारीको उपचार                                            |
| 2020-03-03                       | Kantipur (Nepali)                               | सबै उपाय अवलम्बन गर्नु: सर्वोच्च                                         |
| 2020-08-30                       | Online Khabar (Nepali)                          | सबै कोरोना संक्रमितको जिम्मा लिन सरकारलाई निर्देशन                       |
| 2020-03-23                       | Kantipur (Nepali)                               | सबै सीमा नाका एक साता बन्द                                               |
| 2020-06-05                       | Kantipur (Nepali)                               | समय तोकेर व्यापार                                                        |
| 2020-05-14                       | Kantipur (Nepali)                               | समाजको बहुपत्रीय वर्ग र सरकार                                            |
| 2020-08-28                       | Kantipur (Nepali)                               | समाजलाई प्रश्न-हामीलाई घृणा किन ?                                        |
| 2020-07-30                       | Online Khabar (Nepali)                          | समुदायमा कोरोना देखिएपछि नेपालगन्जमा निषेधाज्ञा                          |
| 2020-07-19                       | Kantipur (Nepali)                               | समुदायमा संक्रमण बुझ्न सर्वेक्षण कहिले ?                                 |
| 2020-08-27                       | Kantipur (Nepali)                               | समूहगत परीक्षण नगरी बित्यो निषेधाज्ञाको एक साता                          |
| 2020-04-21                       | Online Khabar (Nepali)                          | समूहमा नमाज नपढ्न सरकारको अपिल                                           |
| 2020-06-12                       | Kantipur (Nepali)                               | सम्बोधन गर्नुपर्ने सरोकार                                                |
| 2020-03-22                       | Kantipur (Nepali)                               | सय शय्याको अस्पताल बन्दै                                                 |
| 2020-04-27                       | Kantipur (Nepali)                               | सय शय्याको कोरोना अस्पताल                                                |
| 2020-06-05                       | Kantipur (Nepali)                               | सरकार ! पेटभरी खान मन छ                                                  |

| Date of publication (yyyy/mm/dd) | Name of news media (select from drop-down menu) | Title of news/headline                                                           |
|----------------------------------|-------------------------------------------------|----------------------------------------------------------------------------------|
| 2020-05-14                       | Kantipur (Nepali)                               | सरकार असफल                                                                       |
| 2020-06-21                       | Kantipur (Nepali)                               | सरकार आर्थिक संकटमा                                                              |
| 2020-06-18                       | Kantipur (Nepali)                               | सरकार निर्दयी बन्दै                                                              |
| 2020-03-20                       | Online Khabar (Nepali)                          | सरकार लक डाउनतर्फ जाँदै छ ? प्रधानमन्त्रीलाई भेटेपछि ईश्वर पोखरेलले बोलाए बैठक   |
| 2020-05-08                       | Kantipur (Nepali)                               | सरकार, सीमाको हारगुहार सुन                                                       |
| 2020-04-23                       | Online Khabar (Nepali)                          | सरकारका प्रवक्ता भन्छन्-जोखिम हेरेर मात्र लकडाउनबारे निर्णय गर्छौं               |
| 2020-05-22                       | Online Khabar (Nepali)                          | सरकारको अलमल : पहिले काठमाडौंमा, अहिले सिमानामा                                  |
| 2020-06-08                       | Kantipur (Nepali)                               | सरकारको अस्पष्ट नीति                                                             |
| 2020-08-24                       | Kantipur (Nepali)                               | सरकारको उपस्थिति शून्य                                                           |
| 2020-03-21                       | Kantipur (Nepali)                               | सरकारको थप तयारी                                                                 |
| 2020-08-16                       | Online Khabar (Nepali)                          | सरकारको निर्णय विपरीत खुलेको विद्यालयका शिक्षकमा कोरोना                          |
| 2020-04-25                       | Online Khabar (Nepali)                          | सरकारको निष्कर्ष : लकडाउनले कोरोना संक्रमण नियन्त्रणमा                           |
| 2020-05-01                       | Online Khabar (Nepali)                          | सरकारलाई निर्देशन : लकडाउन खुकुलो बनाउनु, जनआस्था कायम गर्नु                     |
| 2020-08-26                       | Online Khabar (Nepali)                          | सरकारले कोरोना नियन्त्रणको योजना सार्वजनिक गरिोस् : कांग्रेस                     |
| 2020-04-10                       | Kantipur (Nepali)                               | सरकारले नै फैलायो अफवाह                                                          |
| 2020-07-05                       | Online Khabar (Nepali)                          | सरकारले भन्यो : ढलमा भाइरस देखिँदैमा समुदायमा कोरोना संक्रमण फैलियो भन्न मिल्दैन |
| 2020-08-02                       | Online Khabar (Nepali)                          | सरकारले वीरगञ्जमा पठायो उच्चस्तरीय स्वास्थ्य टोली                                |
| 2020-05-19                       | Kantipur (Nepali)                               | सरकारले सहयोग र समन्वय नगरे उद्योग व्यवसाय बन्द गर्ने चेतावनी                    |
| 2020-06-12                       | Kantipur (Nepali)                               | सरकारविरुद्ध उत्रिए सडकमा युवा                                                   |
| 2020-06-12                       | Kantipur (Nepali)                               | सरकारी कार्यालय दुई सिफ्टमा                                                      |
| 2020-05-22                       | Online Khabar (Nepali)                          | सर्लाहीमा कोरोना संक्रमित भारतबाट लुकेर नेपाल छिरेका थिए                         |
| 2020-08-16                       | Online Khabar (Nepali)                          | सर्लाहीमा एक साता थपियो निषेधाज्ञा                                               |
| 2020-08-23                       | Online Khabar (Nepali)                          | सर्लाहीमा निषेधाज्ञाको म्याद एक साता थपियो                                       |
| 2020-08-09                       | Online Khabar (Nepali)                          | सर्लाहीमा सोमबारदेखि निषेधाज्ञा                                                  |
| 2020-05-17                       | Online Khabar (Nepali)                          | सर्वोच्चको आदेश : तरकारी र फलफूल आयात गर्दा कोरोना परीक्षण गर्नु                 |
| 2020-08-06                       | Kantipur (Nepali)                               | सवा ५ लाख सरकारी कर्मचारीको कोरोना बिमा                                          |
| 2020-05-12                       | Kantipur (Nepali)                               | सविताबाट सहयोग जारी                                                              |
| 2020-03-22                       | Kantipur (Nepali)                               | सशस्त्रको अस्पताल कोरोनाका लागि मात्रै                                           |
| 2020-04-02                       | Online Khabar (Nepali)                          | सहकारी दिवसको अवसरमा कोरोना नियन्त्रण केन्द्र स्थापना                            |
| 2020-06-29                       | Kantipur (Nepali)                               | सहकारीमा बचत न ब्याज                                                             |
| 2020-08-25                       | Kantipur (Nepali)                               | सहयोग जुटाएर पीसीआर मेसिन                                                        |
| 2020-06-05                       | Kantipur (Nepali)                               | सहरमा रोजगारी गुम्यो, गाउँमा बीउ-मल छैन                                          |
| 2020-05-05                       | Online Khabar (Nepali)                          | सांसदको आग्रह - विदेशमा अलपत्र नेपालीलाई स्वदेश फर्काऊ                           |
| 2020-08-06                       | Kantipur (Nepali)                               | सांसदहरूको 'जबर्जस्ती' भ्रमण !                                                   |
| 2020-05-13                       | Kantipur (Nepali)                               | सांसदहरूलाई राजधानी बाहिर जान रोक                                                |
| 2020-07-21                       | Online Khabar (Nepali)                          | साउन १५ बाट होटल खुल्ने, भोज र पार्टी गर्न नपाइने                                |
| 2020-07-19                       | Kantipur (Nepali)                               | साउन २१ बाट आन्तरिक उडान !                                                       |
| 2020-06-01                       | Online Khabar (Nepali)                          | साझा पार्टीको माग- सांसद विकास कोषको रकमले कोरोना किट किनौं                      |
| 2020-06-10                       | Kantipur (Nepali)                               | साढे १४ हजार नमुना पालोमा                                                        |
| 2020-03-23                       | Kantipur (Nepali)                               | साढे ५ लाख शय्याका कारेन्टाइन बनाइने                                             |

| Date of publication (yyyy/mm/dd) | Name of news media (select from drop-down menu) | Title of news/headline                                                     |
|----------------------------------|-------------------------------------------------|----------------------------------------------------------------------------|
| 2020-07-07                       | Kantipur (Nepali)                               | साढे पाँच महिनापछि रसुवागढीबाट आयात सुरु                                   |
| 2020-06-02                       | Kantipur (Nepali)                               | सातामै भित्रिए १ लाख ३ हजार                                                |
| 2020-03-19                       | Online Khabar (Nepali)                          | सातै प्रदेशमा कोरोना परीक्षणको व्यवस्था मिलाउन सरकारलाई निर्देशन           |
| 2020-05-17                       | Kantipur (Nepali)                               | साना उद्यममा ६०५ रोजगारी गुम्यो'                                           |
| 2020-08-02                       | Kantipur (Nepali)                               | सानालाई ऐन, ठूलालाई चैन !                                                  |
| 2020-05-03                       | Kantipur (Nepali)                               | सानालाई संरक्षण                                                            |
| 2020-06-27                       | Kantipur (Nepali)                               | सामाजिक दूरी                                                               |
| 2020-06-14                       | Kantipur (Nepali)                               | सामाजिक दूरी राखेर प्रदर्शन                                                |
| 2020-06-08                       | Kantipur (Nepali)                               | सामाजिक दूरीसहित व्यापार                                                   |
| 2020-07-07                       | Kantipur (Nepali)                               | सार्वजनिक यातायात चलाउन छलफलमा जुटे व्यवसायी                               |
| 2020-07-15                       | Kantipur (Nepali)                               | सार्वजनिक यातायातमा राज्यको बेवास्ता                                       |
| 2020-07-11                       | Kantipur (Nepali)                               | सार्वजनिक सवारी चले संक्रमण 'भयावह'                                        |
| 2020-07-31                       | Online Khabar (Nepali)                          | सार्वजनिक सवारीमा यात्रा : चिउँडोमा मास्क, सामाजिक दुरी कागजमै सीमित       |
| 2020-03-21                       | Kantipur (Nepali)                               | सावधानी अपनाउँदै ननु चालक                                                  |
| 2020-06-05                       | Kantipur (Nepali)                               | सावधानी अपनाउन सिफारिस                                                     |
| 2020-03-13                       | Kantipur (Nepali)                               | सिजनमै छैनन् पर्यटक                                                        |
| 2020-05-02                       | Kantipur (Nepali)                               | सिनेमामा चौतर्फी संकट                                                      |
| 2020-05-17                       | Online Khabar (Nepali)                          | सिन्धुपाल्चोकका ४ वडा र स्वास्थ्य चौकी सिल, बाह्रबिसे बजार पनि बन्द        |
| 2020-05-13                       | Online Khabar (Nepali)                          | सिरहामा आरडीटी किट अभाव                                                    |
| 2020-08-07                       | Online Khabar (Nepali)                          | सिराहाको लहानमा 'लकडाउन'                                                   |
| 2020-08-16                       | Online Khabar (Nepali)                          | सिराहामा भदौ १५ गतेसम्म लकडाउन                                             |
| 2020-06-06                       | Kantipur (Nepali)                               | सीजीको प्रसूति केन्द्रलाई सहयोग                                            |
| 2020-06-11                       | Kantipur (Nepali)                               | सीडीओभन्दा प्रदेश सरकार तल !                                               |
| 2020-04-18                       | Online Khabar (Nepali)                          | सीमा क्षेत्रमा अलपत्र नेपालीको उद्धार गर्न १० दलको माग                     |
| 2020-08-26                       | Kantipur (Nepali)                               | सीमा वारपार गराउन लेनदेन !                                                 |
| 2020-05-14                       | Kantipur (Nepali)                               | सीमाका अलपत्र २९०० भित्रिए                                                 |
| 2020-05-09                       | Kantipur (Nepali)                               | सीमाका कारिन्दाइनमा पीसीआर                                                 |
| 2020-05-14                       | Kantipur (Nepali)                               | सीमाको गुहार नसुन्ने राष्ट्रवाद                                            |
| 2020-05-09                       | Kantipur (Nepali)                               | सीमापारि रोकिएकालाई भित्र्याउन प्रधानमन्त्री अनिच्छुक                      |
| 2020-07-28                       | Kantipur (Nepali)                               | सीमामा निस्फिक्री आउजाउले जोखिम                                            |
| 2020-05-15                       | Kantipur (Nepali)                               | सीमामा बाँसको बार                                                          |
| 2020-05-07                       | Kantipur (Nepali)                               | सीमामा रोकिएकालाई भित्र्याउन सुरक्षा निकायको सुझाव                         |
| 2020-05-08                       | Kantipur (Nepali)                               | सीमामा सुरक्षाकर्मीमाथि फेरि आक्रमण                                        |
| 2020-03-21                       | Kantipur (Nepali)                               | सीमामा स्वयंसेवी युवा                                                      |
| 2020-04-26                       | Kantipur (Nepali)                               | सीमामै अड्किए २,३१८ नेपाली                                                 |
| 2020-07-11                       | Kantipur (Nepali)                               | सीसीएमसीमा नगर प्रतिनिधि !                                                 |
| 2020-08-30                       | Kantipur (Nepali)                               | सुत्केरीलाई जबर्जस्ती आइसोलेसन                                             |
| 2020-04-05                       | Online Khabar (Nepali)                          | सुदूरपश्चिम सरकार भन्छ- विदेशबाट आएका सबैलाई परीक्षणको दायरामा ल्याउनुपर्छ |
| 2020-04-11                       | Online Khabar (Nepali)                          | सुदूरपश्चिमका सबै जिल्लामा सुरु भयो र्यापिड टेस्ट                          |
| 2020-04-28                       | Online Khabar (Nepali)                          | सुदूरपश्चिममा १५ हजार जनानामा कोरोना परीक्षण                               |
| 2020-04-11                       | Online Khabar (Nepali)                          | सुदूरपश्चिममा १९०० जनानामा र्यापिड टेस्ट, सबैको रिपोर्ट नेगेटिभ            |
| 2020-04-07                       | Online Khabar (Nepali)                          | सुदूरपश्चिममा १९५ नमुना संकलन, ६६ जनाको काठमाडौं पठाइयो                    |

| Date of publication (yyyy/mm/dd) | Name of news media (select from drop-down menu) | Title of news/headline                                                         |
|----------------------------------|-------------------------------------------------|--------------------------------------------------------------------------------|
| 2020-03-28                       | Online Khabar (Nepali)                          | सुदूरपश्चिममा कोरोना भाइरस रोकथामका लागि ४० करोडको कोष                         |
| 2020-04-07                       | Online Khabar (Nepali)                          | सुदूरपश्चिममा न चिकित्सक, न भेन्टिलेटर                                         |
| 2020-04-04                       | Online Khabar (Nepali)                          | सुदूरपश्चिममा भेटिए ३ कोरोना संक्रमित                                          |
| 2020-06-10                       | Kantipur (Nepali)                               | सुदूरपश्चिममा स्वाब संकलन नै रोकियो                                            |
| 2020-06-15                       | Kantipur (Nepali)                               | सुदूरपश्चिमले बढायो मन्त्री-सांसदको तलब                                        |
| 2020-05-09                       | Kantipur (Nepali)                               | सुदूरमा सबै निको                                                               |
| 2020-05-03                       | Kantipur (Nepali)                               | सुनसान रसुवागढी                                                                |
| 2020-05-14                       | Kantipur (Nepali)                               | सुनौली जाने घटेपछि रुपैयाँ जोगियो                                              |
| 2020-05-21                       | Kantipur (Nepali)                               | सुरक्षाकर्मी उच्च जोखिममा                                                      |
| 2020-08-18                       | Online Khabar (Nepali)                          | सुरक्षाकर्मीको तलब काट्न हतार, प्रोत्साहन भत्ता दिन आनाकानी                    |
| 2020-03-22                       | Kantipur (Nepali)                               | सुरक्षात्मक तालिम लिँदै चिकित्सक                                               |
| 2020-05-17                       | Kantipur (Nepali)                               | सुर्खेतमा ५० योजनाले लिए निर्माण अनुमति                                        |
| 2020-06-17                       | Online Khabar (Nepali)                          | सुर्खेतमा आत्महत्या गरेकी युवतीमा कोरोना संक्रमण पुष्टि                        |
| 2020-07-01                       | Online Khabar (Nepali)                          | सुर्खेतमा होटल र रेष्टुरेन्ट बन्द गर्न प्रशासनको निर्देशन                      |
| 2020-03-27                       | Online Khabar (Nepali)                          | सुस्त कन्ट्याक ट्रेसिङ, जनस्वास्थ्यविद् भन्छन् - अमेरिकाले जस्तो खेलाँची नगरौं |
| 2020-03-20                       | Kantipur (Nepali)                               | सेना 'हाई अलर्ट'                                                               |
| 2020-08-11                       | Kantipur (Nepali)                               | सेनालाई १० वटा भेन्टिलेटर                                                      |
| 2020-05-06                       | Kantipur (Nepali)                               | सेनाले अझै ल्याइपुर्याएन स्वास्थ्य सामग्री                                     |
| 2020-06-18                       | Kantipur (Nepali)                               | सेनाले गरेको खरिदमा कुनै अनियमितता छैन'                                        |
| 2020-06-14                       | Kantipur (Nepali)                               | सेनाले भारतबाट औषधि ल्याउने प्रक्रिया अलपत्र                                   |
| 2020-07-03                       | Kantipur (Nepali)                               | सेनाले ल्याएका सामान मागेभन्दा फरक                                             |
| 2020-06-02                       | Kantipur (Nepali)                               | सेनाले ल्याएकामा पीसीआर किट थोरै                                               |
| 2020-05-17                       | Kantipur (Nepali)                               | सेनाले ल्यायो स्वास्थ्य सामग्री                                                |
| 2020-06-26                       | Kantipur (Nepali)                               | सेनिटाइजर र मास्क उत्पादनमा हडताल गर्न निषेध                                   |
| 2020-08-24                       | Kantipur (Nepali)                               | सेभ द चिल्ड्रेनले दियो ७ थान भेन्टिलेटर                                        |
| 2020-05-04                       | Kantipur (Nepali)                               | सेभ द चिल्ड्रेनले दियो पीपीई                                                   |
| 2020-06-29                       | Kantipur (Nepali)                               | सेयर बजार सोमबारदेखि खुल्दै                                                    |
| 2020-06-21                       | Kantipur (Nepali)                               | सेयर बजारबारे अझै टुंगो लागेन                                                  |
| 2020-05-19                       | Kantipur (Nepali)                               | सेल पेबाट कोरोना बिमा                                                          |
| 2020-03-23                       | Kantipur (Nepali)                               | सेल्फ-क्वारेन्टाइनमा कसरी बस्ने ?                                              |
| 2020-08-31                       | Kantipur (Nepali)                               | सैनिकद्वारा गोली हानी आत्महत्या                                                |
| 2020-07-30                       | Kantipur (Nepali)                               | सौराहाका होटल बिहीबारदेखि खुल्दै                                               |
| 2020-05-04                       | Kantipur (Nepali)                               | स्काउटले बढायो सक्रियता                                                        |
| 2020-05-19                       | Kantipur (Nepali)                               | स्ट्यान्डर्ड चार्टर्डले दियो १ करोड १६ लाख                                     |
| 2020-05-16                       | Kantipur (Nepali)                               | स्थानीय तहमै रोजगारी                                                           |
| 2020-06-14                       | Kantipur (Nepali)                               | स्थानीय सरकार मौन                                                              |
| 2020-04-04                       | Online Khabar (Nepali)                          | स्थानीयमा कोरोना संक्रमण : सम्भावित महामारीको पूर्वसूचना !                     |
| 2020-05-17                       | Kantipur (Nepali)                               | स्थानीयमा त्रास                                                                |
| 2020-05-06                       | Kantipur (Nepali)                               | स्थिरता र अस्थिरताको भाष्य                                                     |
| 2020-08-30                       | Kantipur (Nepali)                               | स्याउ उत्पादन आधा घट्यो                                                        |
| 2020-05-27                       | Online Khabar (Nepali)                          | स्यानिटाइज गरियो नारायणी अस्पताल, नियमित सेवा सुरु गर्न अन्याल                 |
| 2020-05-06                       | Kantipur (Nepali)                               | स्यानिटाइजर स्प्रेले स्वास्थ्यमा गम्भीर असर                                    |



| Date of publication (yyyy/mm/dd) | Name of news media (select from drop-down menu) | Title of news/headline                                                               |
|----------------------------------|-------------------------------------------------|--------------------------------------------------------------------------------------|
| 2020-05-10                       | Kantipur (Nepali)                               | स्वदेशी उद्योगले बढाए सेनिटाइजर उत्पादन                                              |
| 2020-05-18                       | Kantipur (Nepali)                               | स्वस्थ माटोमै दिगो रहन्छ कृषि                                                        |
| 2020-06-21                       | Kantipur (Nepali)                               | स्वाब व्यवस्थापनको त्रुटिले गलत नतिजा'                                               |
| 2020-04-28                       | Kantipur (Nepali)                               | स्वाब संकलन नै त्रुटिपूर्ण ः विज्ञ                                                   |
| 2020-05-10                       | Kantipur (Nepali)                               | स्वाब संकलन र ट्रेसिङलाई गति                                                         |
| 2020-08-13                       | Online Khabar (Nepali)                          | स्वाब संकलनमा सहयोग गर्न बस्नेत परिवारलाई मेयरको आग्रह                               |
| 2020-06-08                       | Kantipur (Nepali)                               | स्वार्थमा चुकेको विश्वनेतृत्व                                                        |
| 2020-05-06                       | Kantipur (Nepali)                               | स्वास्थ्य जाँचबिने उपत्यका भित्रनेको लर्को                                           |
| 2020-05-18                       | Kantipur (Nepali)                               | स्वास्थ्य पूर्वाधारको चुनौती                                                         |
| 2020-06-05                       | Online Khabar (Nepali)                          | स्वास्थ्य मन्त्रालयको टेस्टिङ गाइडलाइन : कारेन्टिन बसेका सबैको पीसीआर परीक्षण नगरिने |
| 2020-05-13                       | Online Khabar (Nepali)                          | स्वास्थ्य मन्त्रालयमा पत्रकारलाई प्रवेश निषेध !                                      |
| 2020-08-06                       | Online Khabar (Nepali)                          | स्वास्थ्य मन्त्रालयले भन्यो : कार्यालयहरुमा गोष्ठी र बैठक नगर्नु                     |
| 2020-07-01                       | Online Khabar (Nepali)                          | स्वास्थ्य मन्त्रालयले भन्यो : बालबालिकामा संक्रमण बढ्यो, अभिभावक सचेत हुनुस्         |
| 2020-08-13                       | Online Khabar (Nepali)                          | स्वास्थ्य मन्त्रालयले भन्यो : स्वाब दिएपछि अनिवार्य आइसोलेसनमा बसौं                  |
| 2020-06-03                       | Online Khabar (Nepali)                          | स्वास्थ्य संकटकाल घोषणा गर्न स्वास्थ्य मन्त्रालयको सिफारिस                           |
| 2020-05-17                       | Kantipur (Nepali)                               | स्वास्थ्य संकटमा बढ्दो सामाजिक असमानता                                               |
| 2020-06-22                       | Kantipur (Nepali)                               | स्वास्थ्य सामग्री खरिदमा निर्देशन दिनेलाई उन्मुक्ति?                                 |
| 2020-06-20                       | Kantipur (Nepali)                               | स्वास्थ्य सामग्री खरिदमा मूल्य अन्तर उच्च                                            |
| 2020-04-27                       | Kantipur (Nepali)                               | स्वास्थ्य सामग्री लिन विमान चीनतिर                                                   |
| 2020-04-24                       | Kantipur (Nepali)                               | स्वास्थ्य सामग्री ल्याउन बोलपत्र                                                     |
| 2020-07-23                       | Kantipur (Nepali)                               | स्वास्थ्य सुरक्षाबिने यात्रा                                                         |
| 2020-05-21                       | Kantipur (Nepali)                               | स्वास्थ्यकर्मी उच्च जोखिममा                                                          |
| 2020-03-08                       | Kantipur (Nepali)                               | स्वास्थ्यकर्मी नै जोखिममा                                                            |
| 2020-08-24                       | Online Khabar (Nepali)                          | स्वास्थ्यकर्मी र सुरक्षाकर्मीलाई सम्मानजनक व्यवहार गरौं : मानव अधिकार आयोग           |
| 2020-06-26                       | Kantipur (Nepali)                               | स्वास्थ्यकर्मी संक्रमित भएपछि सेवा बन्द                                              |
| 2020-08-24                       | Kantipur (Nepali)                               | स्वास्थ्यकर्मीमाथिको दुर्व्यवहार अस्वीकार्य                                          |
| 2020-08-23                       | Kantipur (Nepali)                               | स्वास्थ्यकर्मीलाई प्रोत्साहन खोइ?                                                    |
| 2020-08-24                       | Kantipur (Nepali)                               | स्वास्थ्यकर्मीलाई सन्द्भाव चाहिन्छ                                                   |
| 2020-06-05                       | Kantipur (Nepali)                               | स्वास्थ्यका ६ उच्च अधिकारीको सरुवा                                                   |
| 2020-05-28                       | Online Khabar (Nepali)                          | स्वास्थ्यको पूर्वाधार विकासमा उल्लेख्य बजेट, कोरोना उपचारका लागि ६ अर्ब              |
| 2020-06-16                       | Kantipur (Nepali)                               | स्वास्थ्यमा प्राथमिकता, सांसदलाई निरन्तरता                                           |
| 2020-06-01                       | Kantipur (Nepali)                               | स्वास्थ्यमा सुधारको खाँचो                                                            |
| 2020-05-30                       | Kantipur (Nepali)                               | स्वास्थ्यलाई विशाल ग्रुपको सहयोग                                                     |
| 2020-08-24                       | Kantipur (Nepali)                               | स्विपर नै जाँच्छन् संक्रमितको ज्वरो                                                  |
| 2020-07-24                       | Online Khabar (Nepali)                          | स्विस सरकारले दियो २० हजार पीसीआर किट                                                |
| 2020-07-30                       | Online Khabar (Nepali)                          | स्वीकृति पाएका ल्याबले आफैँ स्वाब संकलन गरेर कोरोना परीक्षण गर्न पाउने               |
| 2020-05-07                       | Online Khabar (Nepali)                          | स्वीस सरकारले दिएको ३० हजार पीसीआर किट आज आइपुग्ने                                   |
| 2020-07-02                       | Kantipur (Nepali)                               | हचुवामा उद्धार र घरफिर्ती                                                            |
| 2020-08-05                       | Kantipur (Nepali)                               | 'हटस्पट' मा आइसोलेसन अभाव                                                            |

| Date of publication (yyyy/mm/dd) | Name of news media (select from drop-down menu) | Title of news/headline                                                   |
|----------------------------------|-------------------------------------------------|--------------------------------------------------------------------------|
| 2020-08-14                       | Kantipur (Nepali)                               | हटस्पट' वीरगन्जमा अभावै अभाव                                             |
| 2020-06-28                       | Kantipur (Nepali)                               | हटस्पटका आइसोलेसनमा बिजोग                                                |
| 2020-06-14                       | Kantipur (Nepali)                               | हटस्पटमै छैन कन्ट्याक्ट ट्रेसिङ                                          |
| 2020-05-01                       | Online Khabar (Nepali)                          | हरेक परिवारको कम्तीमा एक जनामा कोरोना जाँच गर्न निर्देशन                 |
| 2020-06-03                       | Online Khabar (Nepali)                          | हल्का लक्षण भएका कोरोना संक्रमित पनि घरमै आइसोलेसनमा बस्न पाउने          |
| 2020-06-13                       | Kantipur (Nepali)                               | हाँस, रोएर केही हुँदैन                                                   |
| 2020-07-04                       | Kantipur (Nepali)                               | हाकिमको अफर                                                              |
| 2020-02-22                       | Kantipur (Nepali)                               | हात धुँदा संक्रमणबाट मुक्ति                                              |
| 2020-03-08                       | Kantipur (Nepali)                               | हात धुन निःशुल्क पानी                                                    |
| 2020-03-21                       | Kantipur (Nepali)                               | हात धुन सिकाउँदै स्काउटर                                                 |
| 2020-03-19                       | Kantipur (Nepali)                               | हात धुने बानी बसालौं                                                     |
| 2020-06-29                       | Kantipur (Nepali)                               | हात धुने बिमार !                                                         |
| 2020-03-17                       | Kantipur (Nepali)                               | हात धोएर अस्पतालमा                                                       |
| 2020-03-21                       | Kantipur (Nepali)                               | हात नधोए सामान किन्न पाइँदैन                                             |
| 2020-06-09                       | Kantipur (Nepali)                               | हातमा मसाल थमाएजस्तै                                                     |
| 2020-05-04                       | Online Khabar (Nepali)                          | हातले नछोइकन निस्कन्छ साबुन, सेनिटाजर र पानी                             |
| 2020-05-04                       | Kantipur (Nepali)                               | हामीलाई कोरोनाले झुक्यायो'                                               |
| 2020-06-09                       | Kantipur (Nepali)                               | हामीले छोएको पैसा चल्दैन'                                                |
| 2020-05-04                       | Kantipur (Nepali)                               | हाम्रो इन्टरनेट कस्तो छ?                                                 |
| 2020-02-27                       | Kantipur (Nepali)                               | हुम्लामा होटल बुकिङ शून्य                                                |
| 2020-06-19                       | Kantipur (Nepali)                               | हेटौंडाका २०५ उद्योग खुलेनन्                                             |
| 2020-08-24                       | Online Khabar (Nepali)                          | हेटौंडामा भदौ १५ गतेसम्म निषेधाज्ञा                                      |
| 2020-07-15                       | Kantipur (Nepali)                               | होटल खुलाउन माग                                                          |
| 2020-08-26                       | Online Khabar (Nepali)                          | होम आइसोलेसनको बेडबाट हेर्दा...                                          |
| 2020-08-21                       | Online Khabar (Nepali)                          | होम आइसोलेसनमा थिए, एम्बुलेन्स बोलाउँदा बोलाउँदै बिते                    |
| 2020-08-20                       | Online Khabar (Nepali)                          | होम आइसोलेसनमा बस्ने संक्रमितलाई टोखा नगरपालिकाले दैनिक ३५० रुपैयाँ दिने |
| 2020-08-16                       | Kantipur (Nepali)                               | होम आइसोलेसनमा बस्नेले नियम मान्दैनन्                                    |

## Bangladesh Media articles

| Date of the news | News URL                                                                                                                                                                                                                                                              | Title of the news                                                     |
|------------------|-----------------------------------------------------------------------------------------------------------------------------------------------------------------------------------------------------------------------------------------------------------------------|-----------------------------------------------------------------------|
| 09/03/2020       | <a href="https://www.tbsnews.net/bangladesh/health/prices-7-hand-sanitizer-brands-fixed-54133">https://www.tbsnews.net/bangladesh/health/prices-7-hand-sanitizer-brands-fixed-54133</a>                                                                               | Prices of seven hand sanitizer brands fixed                           |
| 09/03/2020       | <a href="https://www.tbsnews.net/bangladesh/announcement-made-close-border-haat-check-spread-coronavirus-54082">https://www.tbsnews.net/bangladesh/announcement-made-close-border-haat-check-spread-coronavirus-54082</a>                                             | Announcement made to close border haat to check spread of Coronavirus |
| 09/03/2020       | <a href="https://www.tbsnews.net/bangladesh/2-mymensingh-pharmacies-fined-selling-masks-higher-price-53986">https://www.tbsnews.net/bangladesh/2-mymensingh-pharmacies-fined-selling-masks-higher-price-53986</a>                                                     | 2 Mymensingh pharmacies fined for selling masks at higher price       |
| 09/03/2020       | <a href="https://www.tbsnews.net/bangladesh/health/why-such-overreaction-53944">https://www.tbsnews.net/bangladesh/health/why-such-overreaction-53944</a>                                                                                                             | Why such overreaction over coronavirus?                               |
| 09/03/2020       | <a href="https://www.tbsnews.net/international/coronavirus-chronicle/coronavirus-prompts-panic-shopping-dhaka-53866">https://www.tbsnews.net/international/coronavirus-chronicle/coronavirus-prompts-panic-shopping-dhaka-53866</a>                                   | Coronavirus prompts panic shopping in Dhaka                           |
| 09/03/2020       | <a href="https://www.tbsnews.net/bangladesh/family-relatives-corona-patients-quarantined-health-secretary-53827">https://www.tbsnews.net/bangladesh/family-relatives-corona-patients-quarantined-health-secretary-53827</a>                                           | Closing educational institutions for corona not reasonable'           |
| 09/03/2020       | <a href="https://www.tbsnews.net/bangladesh/health/be-alert-dont-panic-experts-53776">https://www.tbsnews.net/bangladesh/health/be-alert-dont-panic-experts-53776</a>                                                                                                 | Be alert, don't panic: Experts                                        |
| 09/03/2020       | <a href="https://www.tbsnews.net/economy/stock/coronavirus-panic-dhaka-stocks-tumble-205-points-53752">https://www.tbsnews.net/economy/stock/coronavirus-panic-dhaka-stocks-tumble-205-points-53752</a>                                                               | Investors lose Tk17,000 crore in day of corona nervousness            |
| 09/03/2020       | <a href="https://www.tbsnews.net/international/coronavirus-chronicle/uber-delivery-services-compensate-drivers-who-catch-virus-53773">https://www.tbsnews.net/international/coronavirus-chronicle/uber-delivery-services-compensate-drivers-who-catch-virus-53773</a> | Uber, delivery services to compensate drivers who catch virus         |
| 09/03/2020       | <a href="https://www.tbsnews.net/bangladesh/education/universities-plan-move-classes-online-if-coronavirus-breaks-out-53641">https://www.tbsnews.net/bangladesh/education/universities-plan-move-classes-online-if-coronavirus-breaks-out-53641</a>                   | Universities plan to move classes online if coronavirus breaks out    |
| 10/03/2020       | <a href="https://www.tbsnews.net/bangladesh/health/private-hospitals-unable-unwilling-treat-coronavirus-patients-54169">https://www.tbsnews.net/bangladesh/health/private-hospitals-unable-unwilling-treat-coronavirus-patients-54169</a>                             | Private hospitals unable, unwilling to treat coronavirus patients     |
| 10/03/2020       | <a href="https://www.tbsnews.net/markets/store-shelves-empty-coronavirus-fears-lead-hoarding-54259">https://www.tbsnews.net/markets/store-shelves-empty-coronavirus-fears-lead-hoarding-54259</a>                                                                     | Store shelves empty as coronavirus fears lead to hoarding             |
| 10/03/2020       | <a href="https://www.tbsnews.net/companies/coronavirus-hotline-numbers-announced-toll-free-banglalink-subscribers-54265">https://www.tbsnews.net/companies/coronavirus-hotline-numbers-announced-toll-free-banglalink-subscribers-54265</a>                           | Banglalink announces toll-free calls to coronavirus hotlines          |
| 10/03/2020       | <a href="https://www.tbsnews.net/bangladesh/crime/rab-raids-pharmacies-overcharging-complaints-54331">https://www.tbsnews.net/bangladesh/crime/rab-raids-pharmacies-overcharging-complaints-54331</a>                                                                 | 16 pharmacies fined for selling masks, sanitisers at hiked price      |
| 10/03/2020       | <a href="https://www.tbsnews.net/bangladesh/health/woman-flees-sylhet-hospital-after-suspicion-corona-infection-54499">https://www.tbsnews.net/bangladesh/health/woman-flees-sylhet-hospital-after-suspicion-corona-infection-54499</a>                               | Woman flees Sylhet hospital after suspicion of corona infection       |
| 11/03/2020       | <a href="https://www.tbsnews.net/bangladesh/health/few-people-markets-schools-amid-coronavirus-fear-55012">https://www.tbsnews.net/bangladesh/health/few-people-markets-schools-amid-coronavirus-fear-55012</a>                                                       | Fewer people at markets, schools amid virus fear                      |
| 11/03/2020       | <a href="https://www.tbsnews.net/companies/pharma/pharma-industry-braces-raw-material-crisis-54640">https://www.tbsnews.net/companies/pharma/pharma-industry-braces-raw-material-crisis-54640</a>                                                                     | Pharma industry braces for raw material crisis                        |

| <b>Date of the news</b> | <b>News URL</b>                                                                                                                                                                                                                                               | <b>Title of the news</b>                                                       |
|-------------------------|---------------------------------------------------------------------------------------------------------------------------------------------------------------------------------------------------------------------------------------------------------------|--------------------------------------------------------------------------------|
| 11/03/2020              | <a href="https://www.tbsnews.net/economy/trade/dwindling-raw-material-stocks-worry-businesses-54589">https://www.tbsnews.net/economy/trade/dwindling-raw-material-stocks-worry-businesses-54589</a>                                                           | <b>Dwindling raw material stocks worry businesses</b>                          |
| 12/03/2020              | <a href="https://www.tbsnews.net/companies/summit-donates-5-thermal-scanners-health-ministry-55522">https://www.tbsnews.net/companies/summit-donates-5-thermal-scanners-health-ministry-55522</a>                                                             | <b>Summit donates 5 thermal scanners to health ministry</b>                    |
| 13/03/2020              | <a href="https://www.tbsnews.net/economy/rmg/apparel-exporters-face-cancellation-orders-55579">https://www.tbsnews.net/economy/rmg/apparel-exporters-face-cancellation-orders-55579</a>                                                                       | <b>RMG makers stare at order cancellations</b>                                 |
| 13/03/2020              | <a href="https://www.tbsnews.net/economy/industry/coronavirus-dampens-luxury-hotel-business-chattogram-55684">https://www.tbsnews.net/economy/industry/coronavirus-dampens-luxury-hotel-business-chattogram-55684</a>                                         | <b>Coronavirus dampens luxury hotel business in Chattogram</b>                 |
| 13/03/2020              | <a href="https://www.tbsnews.net/markets/fear-corona-grips-shoppers-56002">https://www.tbsnews.net/markets/fear-corona-grips-shoppers-56002</a>                                                                                                               | <b>Fear of corona grips shoppers</b>                                           |
| 13/03/2020              | <a href="https://www.tbsnews.net/international/coronavirus-chronicle/unilever-asks-employees-work-home-amid-coronavirus-concerns">https://www.tbsnews.net/international/coronavirus-chronicle/unilever-asks-employees-work-home-amid-coronavirus-concerns</a> | <b>Unilever asks employees to work from home amid coronavirus concerns</b>     |
| 14/03/2020              | <a href="https://www.tbsnews.net/bangladesh/summit-group-presents-thermal-scanners-health-ministry-56071">https://www.tbsnews.net/bangladesh/summit-group-presents-thermal-scanners-health-ministry-56071</a>                                                 | <b>Summit group presents thermal scanners to the Health Ministry</b>           |
| 14/03/2020              | <a href="https://www.tbsnews.net/economy/trade/import-falls-17-month-chattogram-port-56227">https://www.tbsnews.net/economy/trade/import-falls-17-month-chattogram-port-56227</a>                                                                             | <b>Import falls 17% in a month at Chattogram port</b>                          |
| 15/03/2020              | <a href="https://www.tbsnews.net/bangladesh/health/coronavirus-demand-closure-educational-institutions-gets-louder-56848">https://www.tbsnews.net/bangladesh/health/coronavirus-demand-closure-educational-institutions-gets-louder-56848</a>                 | <b>Coronavirus: Demand for closure of educational institutions gets louder</b> |
| 15/03/2020              | <a href="https://www.tbsnews.net/bangladesh/crime/daraz-fined-selling-mask-high-price-56845">https://www.tbsnews.net/bangladesh/crime/daraz-fined-selling-mask-high-price-56845</a>                                                                           | <b>Daraz fined for selling mask at high price</b>                              |
| 15/03/2020              | <a href="https://www.tbsnews.net/bangladesh/some-countries-want-cancel-apparel-orders-tipu-munshi-56809">https://www.tbsnews.net/bangladesh/some-countries-want-cancel-apparel-orders-tipu-munshi-56809</a>                                                   | <b>Some countries want to cancel apparel orders: Tipu Munshi</b>               |
| 15/03/2020              | <a href="https://www.tbsnews.net/bangladesh/health/forgotten-ones-our-fight-against-coronavirus-56656">https://www.tbsnews.net/bangladesh/health/forgotten-ones-our-fight-against-coronavirus-56656</a>                                                       | <b>The forgotten ones in our fight against coronavirus</b>                     |
| 15/03/2020              | <a href="https://www.tbsnews.net/economy/trade/raw-material-supply-eases-export-markets-worsen-due-coronavirus-56440">https://www.tbsnews.net/economy/trade/raw-material-supply-eases-export-markets-worsen-due-coronavirus-56440</a>                         | <b>Raw material supply eases, but export markets worsen due to coronavirus</b> |
| 16/03/2020              | <a href="https://www.tbsnews.net/bangladesh/health/few-test-facility-inability-quarantine-patients-expose-holes-56857">https://www.tbsnews.net/bangladesh/health/few-test-facility-inability-quarantine-patients-expose-holes-56857</a>                       | <b>Few test facility, inability to quarantine returnees expose holes</b>       |
| 16/03/2020              | <a href="https://www.tbsnews.net/economy/aviation/aviation-nosedives-corona-fallout-56905">https://www.tbsnews.net/economy/aviation/aviation-nosedives-corona-fallout-56905</a>                                                                               | <b>Aviation nosedives on corona fallout</b>                                    |
| 16/03/2020              | <a href="https://www.tbsnews.net/bangladesh/education/govt-orders-closure-all-educational-institutions-march-17-56947">https://www.tbsnews.net/bangladesh/education/govt-orders-closure-all-educational-institutions-march-17-56947</a>                       | <b>Educational institutions to remain closed till March 31</b>                 |
| 16/03/2020              | <a href="https://www.tbsnews.net/economy/foreign-aid/coronavirus-wb-provide-100m-loan-support-bangladesh-57061">https://www.tbsnews.net/economy/foreign-aid/coronavirus-wb-provide-100m-loan-support-bangladesh-57061</a>                                     | <b>Coronavirus: WB to provide \$100m loan to support Bangladesh</b>            |
| 16/03/2020              | <a href="https://www.tbsnews.net/economy/posh-hotel-employees-fear-job-losses-57085">https://www.tbsnews.net/economy/posh-hotel-employees-fear-job-losses-57085</a>                                                                                           | <b>Posh hotel employees fear job losses</b>                                    |
| 16/03/2020              | <a href="https://www.tbsnews.net/bangladesh/telecom/gp-encourages-part-its-team-work-home-57166">https://www.tbsnews.net/bangladesh/telecom/gp-encourages-part-its-team-work-home-57166</a>                                                                   | <b>GP encourages a part of its team to work from home</b>                      |

| <b>Date of the news</b> | <b>News URL</b>                                                                                                                                                                                                                                                   | <b>Title of the news</b>                                                                    |
|-------------------------|-------------------------------------------------------------------------------------------------------------------------------------------------------------------------------------------------------------------------------------------------------------------|---------------------------------------------------------------------------------------------|
| 16/03/2020              | <a href="https://www.tbsnews.net/companies/telecom/banglalink-implement-work-home-policy-curb-coronavirus-spread-57202">https://www.tbsnews.net/companies/telecom/banglalink-implement-work-home-policy-curb-coronavirus-spread-57202</a>                         | <b>Banglalink to implement work from home policy to curb coronavirus spread</b>             |
| 16/03/2020              | <a href="https://www.tbsnews.net/bangladesh/coronavirus-guardians-happy-shutdown-educational-institutions-57214">https://www.tbsnews.net/bangladesh/coronavirus-guardians-happy-shutdown-educational-institutions-57214</a>                                       | <b>Coronavirus: Guardians happy with shutdown of educational institutions</b>               |
| 16/03/2020              | <a href="https://www.tbsnews.net/bangladesh/no-decision-yet-over-closure-mills-factories-secy-57220">https://www.tbsnews.net/bangladesh/no-decision-yet-over-closure-mills-factories-secy-57220</a>                                                               | <b>No decision yet over closure of mills, factories: Secy</b>                               |
| 16/03/2020              | <a href="https://www.tbsnews.net/bangladesh/health/coronavirus-govt-issues-directives-home-quarantine-57226">https://www.tbsnews.net/bangladesh/health/coronavirus-govt-issues-directives-home-quarantine-57226</a>                                               | <b>Coronavirus: Govt issues directives for home quarantine</b>                              |
| 16/03/2020              | <a href="https://www.tbsnews.net/glitz/cinema-halls-remain-closed-until-april-2-57256">https://www.tbsnews.net/glitz/cinema-halls-remain-closed-until-april-2-57256</a>                                                                                           | <b>Cinema halls to remain closed until April 2</b>                                          |
| 16/03/2020              | <a href="https://www.tbsnews.net/bangladesh/health/bankers-start-using-gloves-touch-money-57280">https://www.tbsnews.net/bangladesh/health/bankers-start-using-gloves-touch-money-57280</a>                                                                       | <b>Bankers start using gloves to touch money</b>                                            |
| 17/03/2020              | <a href="https://www.tbsnews.net/bangladesh/health/dncc-launches-hand-wash-programme-25-spots-city-57670">https://www.tbsnews.net/bangladesh/health/dncc-launches-hand-wash-programme-25-spots-city-57670</a>                                                     | <b>DNCC launches hand wash programme at 25 spots in city</b>                                |
| 17/03/2020              | <a href="https://www.tbsnews.net/bangladesh/health/returnee-expats-asked-not-go-mosques-islamic-foundation-57664">https://www.tbsnews.net/bangladesh/health/returnee-expats-asked-not-go-mosques-islamic-foundation-57664</a>                                     | <b>Returnee expats asked not to go to mosques: Islamic Foundation</b>                       |
| 17/03/2020              | <a href="https://www.tbsnews.net/bangladesh/health/coronavirus-bidyanondo-sprays-disinfectant-vehicles-distributes-hand-sanitisers">https://www.tbsnews.net/bangladesh/health/coronavirus-bidyanondo-sprays-disinfectant-vehicles-distributes-hand-sanitisers</a> | <b>Coronavirus: Bidyanondo sprays disinfectant in vehicles, distributes hand sanitisers</b> |
| 17/03/2020              | <a href="https://www.tbsnews.net/bangladesh/telecom/gp-robi-banglalink-encourage-staff-work-home-over-coronavirus-57310">https://www.tbsnews.net/bangladesh/telecom/gp-robi-banglalink-encourage-staff-work-home-over-coronavirus-57310</a>                       | <b>GP, Robi, Banglalink encourage staff to work from home over coronavirus</b>              |
| 18/03/2020              | <a href="https://www.tbsnews.net/bangladesh/dhakas-elite-clubs-plan-closures-amid-coronavirus-58108">https://www.tbsnews.net/bangladesh/dhakas-elite-clubs-plan-closures-amid-coronavirus-58108</a>                                                               | <b>Dhaka's elite clubs plan closures amid coronavirus</b>                                   |
| 18/03/2020              | <a href="https://www.tbsnews.net/bangladesh/health-ministry-seeks-tk200cr-coronavirus-fund-58132">https://www.tbsnews.net/bangladesh/health-ministry-seeks-tk200cr-coronavirus-fund-58132</a>                                                                     | <b>Tongi Bishwa Ijtema grounds to be turned into quarantine centre</b>                      |
| 18/03/2020              | <a href="https://www.tbsnews.net/coronavirus-chronicle/gonoshasthaya-develops-simple-cheap-effective-coronavirus-test-system-58171">https://www.tbsnews.net/coronavirus-chronicle/gonoshasthaya-develops-simple-cheap-effective-coronavirus-test-system-58171</a> | <b>Gonoshasthaya develops 'simple, cheap, effective' Coronavirus test system</b>            |
| 18/03/2020              | <a href="https://www.tbsnews.net/bangladesh/campaigning-chattoqram-city-corporation-polls-continues-amid-corona-scare-58195">https://www.tbsnews.net/bangladesh/campaigning-chattoqram-city-corporation-polls-continues-amid-corona-scare-58195</a>               | <b>Campaigning for Chattogram City Corporation polls continues amid corona scare</b>        |
| 18/03/2020              | <a href="https://www.tbsnews.net/bangladesh/corona-unit-be-set-each-division-maleque-58165">https://www.tbsnews.net/bangladesh/corona-unit-be-set-each-division-maleque-58165</a>                                                                                 | <b>'Corona unit' to be set up at each division: Maleque</b>                                 |
| 18/03/2020              | <a href="https://www.tbsnews.net/bangladesh/coronavirus-25000-people-attend-laxmipur-prayer-58159">https://www.tbsnews.net/bangladesh/coronavirus-25000-people-attend-laxmipur-prayer-58159</a>                                                                   | <b>Coronavirus: 25,000 people attend Laxmipur prayer</b>                                    |
| 18/03/2020              | <a href="https://www.tbsnews.net/bangladesh/govt-urges-people-not-hoard-enough-food-country-58204">https://www.tbsnews.net/bangladesh/govt-urges-people-not-hoard-enough-food-country-58204</a>                                                                   | <b>Minister's assurance ignored, panic buying spree continues</b>                           |
| 19/03/2020              | <a href="https://www.tbsnews.net/coronavirus-chronicle/slum-residents-have-little-protection-against-covid-19-58432">https://www.tbsnews.net/coronavirus-chronicle/slum-residents-have-little-protection-against-covid-19-58432</a>                               | <b>Slum residents have little protection against Covid-19</b>                               |

| <b>Date of the news</b> | <b>News URL</b>                                                                                                                                                                                                                                     | <b>Title of the news</b>                                                        |
|-------------------------|-----------------------------------------------------------------------------------------------------------------------------------------------------------------------------------------------------------------------------------------------------|---------------------------------------------------------------------------------|
| 19/03/2020              | <a href="https://www.tbsnews.net/coronavirus-chronicle/frontline-fighters-lack-enough-personal-safety-gear-58288">https://www.tbsnews.net/coronavirus-chronicle/frontline-fighters-lack-enough-personal-safety-gear-58288</a>                       | <b>Frontline fighters lack enough personal safety gear</b>                      |
| 19/03/2020              | <a href="https://www.tbsnews.net/bangladesh/city-hospitals-empty-corridors-and-worried-faces-58630">https://www.tbsnews.net/bangladesh/city-hospitals-empty-corridors-and-worried-faces-58630</a>                                                   | <b>At city hospitals, empty corridors and worried faces</b>                     |
| 19/03/2020              | <a href="https://www.tbsnews.net/bangladesh/crime/2-detained-selling-used-masks-gloves-58300">https://www.tbsnews.net/bangladesh/crime/2-detained-selling-used-masks-gloves-58300</a>                                                               | <b>2 detained for selling used masks, gloves</b>                                |
| 19/03/2020              | <a href="https://www.tbsnews.net/tech/smartphones/huawei-offers-free-mobile-disinfection-service-bangladesh-58354">https://www.tbsnews.net/tech/smartphones/huawei-offers-free-mobile-disinfection-service-bangladesh-58354</a>                     | <b>Huawei offers free mobile disinfection service in Bangladesh</b>             |
| 19/03/2020              | <a href="https://www.tbsnews.net/bangladesh/health/gonoshasthaya-kendra-now-can-import-materials-corona-testing-kit-58405">https://www.tbsnews.net/bangladesh/health/gonoshasthaya-kendra-now-can-import-materials-corona-testing-kit-58405</a>     | <b>Gonoshasthaya Kendra now can import raw materials for corona testing kit</b> |
| 20/03/2020              | <a href="https://www.tbsnews.net/bangladesh/bida-distribute-free-face-masks-across-country-58927">https://www.tbsnews.net/bangladesh/bida-distribute-free-face-masks-across-country-58927</a>                                                       | <b>Bida to distribute free face masks across the country</b>                    |
| 20/03/2020              | <a href="https://www.tbsnews.net/markets/panic-buying-raises-commodity-prices-more-58780">https://www.tbsnews.net/markets/panic-buying-raises-commodity-prices-more-58780</a>                                                                       | <b>Rice, onion retailers cash in on panic buying</b>                            |
| 20/03/2020              | <a href="https://www.tbsnews.net/bangladesh/crime/rab-detains-one-spreading-rumors-about-coronavirus-facebook-58882">https://www.tbsnews.net/bangladesh/crime/rab-detains-one-spreading-rumors-about-coronavirus-facebook-58882</a>                 | <b>RAB detains one for spreading rumors about coronavirus on Facebook</b>       |
| 20/03/2020              | <a href="https://www.tbsnews.net/bangladesh/health/drug-stores-see-buyers-rush-dhaka-58897">https://www.tbsnews.net/bangladesh/health/drug-stores-see-buyers-rush-dhaka-58897</a>                                                                   | <b>Drug stores see buyers' rush in Dhaka</b>                                    |
| 20/03/2020              | <a href="https://www.tbsnews.net/bangladesh/lakshmipur-town-shops-closed-till-march-31-58912">https://www.tbsnews.net/bangladesh/lakshmipur-town-shops-closed-till-march-31-58912</a>                                                               | <b>Lakshmipur town shops closed till March 31</b>                               |
| 20/03/2020              | <a href="https://www.tbsnews.net/economy/shopping-malls-empty-staff-fear-losing-jobs-58921">https://www.tbsnews.net/economy/shopping-malls-empty-staff-fear-losing-jobs-58921</a>                                                                   | <b>Shopping malls empty, staff fear losing jobs</b>                             |
| 21/03/2020              | <a href="https://www.tbsnews.net/coronavirus-chronicle/lower-income-people-suffer-double-blow-59296">https://www.tbsnews.net/coronavirus-chronicle/lower-income-people-suffer-double-blow-59296</a>                                                 | <b>Lower income people suffer double blow</b>                                   |
| 21/03/2020              | <a href="https://www.tbsnews.net/economy/rmg/eight-lakh-garment-workers-chattogram-face-corona-risk-59314">https://www.tbsnews.net/economy/rmg/eight-lakh-garment-workers-chattogram-face-corona-risk-59314</a>                                     | <b>Eight lakh garment workers in Chattogram face corona risk</b>                |
| 21/03/2020              | <a href="https://www.tbsnews.net/coronavirus-chronicle/sajida-foundation-provide-10000-personal-protective-equipments-59272">https://www.tbsnews.net/coronavirus-chronicle/sajida-foundation-provide-10000-personal-protective-equipments-59272</a> | <b>Sajida Foundation to provide 10,000 personal protective equipments</b>       |
| 21/03/2020              | <a href="https://www.tbsnews.net/coronavirus-chronicle/coronavirus-dru-launches-ambulance-service-members-59266">https://www.tbsnews.net/coronavirus-chronicle/coronavirus-dru-launches-ambulance-service-members-59266</a>                         | <b>Coronavirus: DRU launches ambulance service for members</b>                  |
| 21/03/2020              | <a href="https://www.tbsnews.net/bangladesh/education/coronavirus-british-council-postpones-regular-courses-classes-59239">https://www.tbsnews.net/bangladesh/education/coronavirus-british-council-postpones-regular-courses-classes-59239</a>     | <b>Coronavirus: British Council postpones regular courses, classes</b>          |
| 21/03/2020              | <a href="https://www.tbsnews.net/bangladesh/4-doctors-15-staff-delta-medical-quarantined-59221">https://www.tbsnews.net/bangladesh/4-doctors-15-staff-delta-medical-quarantined-59221</a>                                                           | <b>4 doctors, 15 staff of Delta Medical quarantined</b>                         |
| 21/03/2020              | <a href="https://www.tbsnews.net/bangladesh/who-suggests-lockdown-curb-spread-coronavirus-59215">https://www.tbsnews.net/bangladesh/who-suggests-lockdown-curb-spread-coronavirus-59215</a>                                                         | <b>WHO suggests lockdown to curb spread of coronavirus</b>                      |



| <b>Date of the news</b> | <b>News URL</b>                                                                                                                                                                                                                                     | <b>Title of the news</b>                                                     |
|-------------------------|-----------------------------------------------------------------------------------------------------------------------------------------------------------------------------------------------------------------------------------------------------|------------------------------------------------------------------------------|
| 21/03/2020              | <a href="https://www.tbsnews.net/coronavirus-chronicle/adb-support-bangladesh-fight-against-coronavirus-59209">https://www.tbsnews.net/coronavirus-chronicle/adb-support-bangladesh-fight-against-coronavirus-59209</a>                             | <b>ADB to support Bangladesh in fight against coronavirus</b>                |
| 21/03/2020              | <a href="https://www.tbsnews.net/coronavirus-chronicle/jack-ma-donate-corona-testing-kits-protective-gears-bangladesh-59104">https://www.tbsnews.net/coronavirus-chronicle/jack-ma-donate-corona-testing-kits-protective-gears-bangladesh-59104</a> | <b>Jack Ma to donate corona testing kits, protective gears to Bangladesh</b> |
| 21/03/2020              | <a href="https://www.tbsnews.net/bangladesh/infrastructure/world-bank-approves-170-million-better-sanitation-dhaka-59029">https://www.tbsnews.net/bangladesh/infrastructure/world-bank-approves-170-million-better-sanitation-dhaka-59029</a>       | <b>World Bank approves \$170 million for better sanitation in Dhaka</b>      |
| 21/03/2020              | <a href="https://www.tbsnews.net/companies/sheba-xyz-employees-start-home-office-59011">https://www.tbsnews.net/companies/sheba-xyz-employees-start-home-office-59011</a>                                                                           | <b>Sheba XYZ employees start home office</b>                                 |
| 21/03/2020              | <a href="https://www.tbsnews.net/glitz/star-cineplex-shuts-down-due-covid-19-outbreak-58996">https://www.tbsnews.net/glitz/star-cineplex-shuts-down-due-covid-19-outbreak-58996</a>                                                                 | <b>Star Cineplex shuts down due to Covid-19 outbreak</b>                     |
| 21/03/2020              | <a href="https://www.tbsnews.net/economy/factories-not-be-closed-labour-ministry-59185">https://www.tbsnews.net/economy/factories-not-be-closed-labour-ministry-59185</a>                                                                           | <b>Factories will not be closed: State minister</b>                          |
| 22/03/2020              | <a href="https://www.tbsnews.net/coronavirus-chronicle/coughing-hospitals-dont-want-you-59350">https://www.tbsnews.net/coronavirus-chronicle/coughing-hospitals-dont-want-you-59350</a>                                                             | <b>Coughing? Hospitals don't want you</b>                                    |
| 22/03/2020              | <a href="https://www.tbsnews.net/bangladesh/health/brac-university-pharmacy-faculty-starts-making-hand-rub-59401">https://www.tbsnews.net/bangladesh/health/brac-university-pharmacy-faculty-starts-making-hand-rub-59401</a>                       | <b>BRAC University Pharmacy Faculty starts making hand rub</b>               |
| 22/03/2020              | <a href="https://www.tbsnews.net/bangladesh/doctor-arrested-spreading-coronavirus-rumours-59410">https://www.tbsnews.net/bangladesh/doctor-arrested-spreading-coronavirus-rumours-59410</a>                                                         | <b>Doctor arrested for spreading rumours over coronavirus</b>                |
| 22/03/2020              | <a href="https://www.tbsnews.net/bangladesh/court/high-court-orders-supply-protective-gears-doctors-nurses-59482">https://www.tbsnews.net/bangladesh/court/high-court-orders-supply-protective-gears-doctors-nurses-59482</a>                       | <b>Supply personal protective material to doctors, nurses: High Court</b>    |
| 22/03/2020              | <a href="https://www.tbsnews.net/bangladesh/carew-co-producing-hand-sanitiser-59557">https://www.tbsnews.net/bangladesh/carew-co-producing-hand-sanitiser-59557</a>                                                                                 | <b>Carew &amp; Co producing hand sanitiser</b>                               |
| 22/03/2020              | <a href="https://www.tbsnews.net/bangladesh/industries-ministry-takes-safety-measures-check-coronavirus-spread-59614">https://www.tbsnews.net/bangladesh/industries-ministry-takes-safety-measures-check-coronavirus-spread-59614</a>               | <b>Industries ministry takes safety measures to check coronavirus spread</b> |
| 22/03/2020              | <a href="https://www.tbsnews.net/economy/rmg/bangladeshi-rmg-factories-start-making-masks-donating-rubana-huq-59536">https://www.tbsnews.net/economy/rmg/bangladeshi-rmg-factories-start-making-masks-donating-rubana-huq-59536</a>                 | <b>Bangladeshi RMG factories start making masks, donating: Rubana Huq</b>    |
| 22/03/2020              | <a href="https://www.tbsnews.net/bangladesh/coronavirus-outbreak-could-become-worse-april-dscc-mayor-59563">https://www.tbsnews.net/bangladesh/coronavirus-outbreak-could-become-worse-april-dscc-mayor-59563</a>                                   | <b>Coronavirus outbreak could become worse by April : Dhaka South Mayor</b>  |
| 22/03/2020              | <a href="https://www.tbsnews.net/bangladesh/telecom/grameenphone-tells-everyone-stay-safe-home-59674">https://www.tbsnews.net/bangladesh/telecom/grameenphone-tells-everyone-stay-safe-home-59674</a>                                               | <b>Grameenphone tells everyone to stay safe at home</b>                      |
| 22/03/2020              | <a href="https://www.tbsnews.net/markets/shop-owners-association-decides-close-shopping-malls-59653">https://www.tbsnews.net/markets/shop-owners-association-decides-close-shopping-malls-59653</a>                                                 | <b>Shopping malls to be shut, not superstores</b>                            |
| 22/03/2020              | <a href="https://www.tbsnews.net/bangladesh/health/synchronised-and-effective-approach-must-fight-coronavirus-59659">https://www.tbsnews.net/bangladesh/health/synchronised-and-effective-approach-must-fight-coronavirus-59659</a>                 | <b>'Synchronised and effective approach a must to fight coronavirus'</b>     |
| 22/03/2020              | <a href="https://www.tbsnews.net/bangladesh/legal-notice-airing-special-programmes-covid-19-59662">https://www.tbsnews.net/bangladesh/legal-notice-airing-special-programmes-covid-19-59662</a>                                                     | <b>Legal notice for airing special programmes on Covid-19</b>                |

| <b>Date of the news</b> | <b>News URL</b>                                                                                                                                                                                                                                                       | <b>Title of the news</b>                                                           |
|-------------------------|-----------------------------------------------------------------------------------------------------------------------------------------------------------------------------------------------------------------------------------------------------------------------|------------------------------------------------------------------------------------|
| 22/03/2020              | <a href="https://www.tbsnews.net/coronavirus-chronicle/all-taxes-waived-import-corona-safety-kits-and-service-materials-59668">https://www.tbsnews.net/coronavirus-chronicle/all-taxes-waived-import-corona-safety-kits-and-service-materials-59668</a>               | <b>All taxes waived on import of corona safety kits and service materials</b>      |
| 22/03/2020              | <a href="https://www.tbsnews.net/economy/bcsir-provide-free-hand-sanitizers-people-59686">https://www.tbsnews.net/economy/bcsir-provide-free-hand-sanitizers-people-59686</a>                                                                                         | <b>BCSIR to provide free hand sanitizers for people</b>                            |
| 22/03/2020              | <a href="https://www.tbsnews.net/bangladesh/health/1000-fmc-dockyard-staff-members-living-working-site-chattogram-59713">https://www.tbsnews.net/bangladesh/health/1000-fmc-dockyard-staff-members-living-working-site-chattogram-59713</a>                           | <b>1,000 FMC Dockyard staff members living, working on-site in Chattogram</b>      |
| 22/03/2020              | <a href="https://www.tbsnews.net/bangladesh/health/two-house-owners-waive-rent-tenants-amid-coronavirus-crisis-59701">https://www.tbsnews.net/bangladesh/health/two-house-owners-waive-rent-tenants-amid-coronavirus-crisis-59701</a>                                 | <b>Two house owners waive rent for tenants amid coronavirus crisis</b>             |
| 22/03/2020              | <a href="https://www.tbsnews.net/bangladesh/21-shyambazar-warehouses-fined-tk4050-lakh-59728">https://www.tbsnews.net/bangladesh/21-shyambazar-warehouses-fined-tk4050-lakh-59728</a>                                                                                 | <b>21 Shyambazar warehouses fined Tk40.50 lakh</b>                                 |
| 22/03/2020              | <a href="https://www.tbsnews.net/coronavirus-chronicle/delta-hospital-doctor-tests-positive-coronavirus-59740">https://www.tbsnews.net/coronavirus-chronicle/delta-hospital-doctor-tests-positive-coronavirus-59740</a>                                               | <b>Delta hospital doctor who treated dead corona patient also got infected</b>     |
| 23/03/2020              | <a href="https://www.tbsnews.net/coronavirus-chronicle/coronavirus-bangladesh/ms-bangladesh-steps-produce-ppe-60043">https://www.tbsnews.net/coronavirus-chronicle/coronavirus-bangladesh/ms-bangladesh-steps-produce-ppe-60043</a>                                   | <b>M&amp;S Bangladesh steps up to produce PPE</b>                                  |
| 23/03/2020              | <a href="https://www.tbsnews.net/economy/banking/bb-allows-advance-payment-500000-import-corona-treatment-materials-59953">https://www.tbsnews.net/economy/banking/bb-allows-advance-payment-500000-import-corona-treatment-materials-59953</a>                       | <b>BB allows advance payment of \$500,000 to import corona treatment materials</b> |
| 23/03/2020              | <a href="https://www.tbsnews.net/bangladesh/we-have-enough-stock-ppe-bma-59875">https://www.tbsnews.net/bangladesh/we-have-enough-stock-ppe-bma-59875</a>                                                                                                             | <b>We have enough stock of PPE: BMA</b>                                            |
| 23/03/2020              | <a href="https://www.tbsnews.net/bangladesh/gulshan-society-launches-disinfection-programme-amid-coronavirus-59866">https://www.tbsnews.net/bangladesh/gulshan-society-launches-disinfection-programme-amid-coronavirus-59866</a>                                     | <b>Gulshan Society launches disinfection programme amid coronavirus</b>            |
| 23/03/2020              | <a href="https://www.tbsnews.net/markets/supermarkets-will-remain-open-59749">https://www.tbsnews.net/markets/supermarkets-will-remain-open-59749</a>                                                                                                                 | <b>Supermarkets that will remain open</b>                                          |
| 23/03/2020              | <a href="https://www.tbsnews.net/economy/rmg-factories-operating-precautionary-measures-60022">https://www.tbsnews.net/economy/rmg-factories-operating-precautionary-measures-60022</a>                                                                               | <b>RMG factories operating with precautionary measures</b>                         |
| 23/03/2020              | <a href="https://www.tbsnews.net/coronavirus-chronicle/coronavirus-bangladesh/bidyanondo-providing-food-home-quarantined-capital">https://www.tbsnews.net/coronavirus-chronicle/coronavirus-bangladesh/bidyanondo-providing-food-home-quarantined-capital</a>         | <b>Bidyanondo providing food for home-quarantined in capital</b>                   |
| 23/03/2020              | <a href="https://www.tbsnews.net/coronavirus-chronicle/coronavirus-bangladesh/prime-bank-launches-awareness-campaign-fight">https://www.tbsnews.net/coronavirus-chronicle/coronavirus-bangladesh/prime-bank-launches-awareness-campaign-fight</a>                     | <b>Prime Bank launches awareness campaign to fight Coronavirus</b>                 |
| 23/03/2020              | <a href="https://www.tbsnews.net/coronavirus-chronicle/coronavirus-bangladesh/locals-protest-against-admitting-corona-patient-uttara">https://www.tbsnews.net/coronavirus-chronicle/coronavirus-bangladesh/locals-protest-against-admitting-corona-patient-uttara</a> | <b>Locals protest against admitting corona patient in Uttara hospitals</b>         |
| 23/03/2020              | <a href="https://www.tbsnews.net/coronavirus-chronicle/coronavirus-bangladesh/chattogram-hospital-closes-icu-hdu-units-after-death">https://www.tbsnews.net/coronavirus-chronicle/coronavirus-bangladesh/chattogram-hospital-closes-icu-hdu-units-after-death</a>     | <b>Chattogram hospital closes ICU, HDU units after death of pneumonia patient</b>  |
| 23/03/2020              | <a href="https://www.tbsnews.net/bangladesh/health/sufficient-azithromycin-stock-fight-corona-drug-administration-dg-59821">https://www.tbsnews.net/bangladesh/health/sufficient-azithromycin-stock-fight-corona-drug-administration-dg-59821</a>                     | <b>Sufficient Azithromycin in stock to fight corona: Drug Administration DG</b>    |



| <b>Date of the news</b> | <b>News URL</b>                                                                                                                                                                                                                                                       | <b>Title of the news</b>                                                              |
|-------------------------|-----------------------------------------------------------------------------------------------------------------------------------------------------------------------------------------------------------------------------------------------------------------------|---------------------------------------------------------------------------------------|
| 23/03/2020              | <a href="https://www.tbsnews.net/sports/players-ask-everyone-stay-aware-amid-coronavirus-outbreak-59986">https://www.tbsnews.net/sports/players-ask-everyone-stay-aware-amid-coronavirus-outbreak-59986</a>                                                           | <b>Players ask everyone to stay aware amid coronavirus outbreak</b>                   |
| 23/03/2020              | <a href="https://www.tbsnews.net/bangladesh/health/ppe-not-need-much-now-health-minister-60115">https://www.tbsnews.net/bangladesh/health/ppe-not-need-much-now-health-minister-60115</a>                                                                             | <b>PPE not needed that much now: Health minister</b>                                  |
| 23/03/2020              | <a href="https://www.tbsnews.net/economy/rmg/apparel-makers-assure-timely-pay-workers-60199">https://www.tbsnews.net/economy/rmg/apparel-makers-assure-timely-pay-workers-60199</a>                                                                                   | <b>Apparel makers assure timely pay to workers</b>                                    |
| 24/03/2020              | <a href="https://www.tbsnews.net/coronavirus-chronicle/coronavirus-bangladesh/brac-producing-masks-plans-ppe-production-battle">https://www.tbsnews.net/coronavirus-chronicle/coronavirus-bangladesh/brac-producing-masks-plans-ppe-production-battle</a>             | <b>BRAC producing masks, plans PPE production to battle coronavirus</b>               |
|                         | <a href="https://www.tbsnews.net/bangladesh/daraz-takes-steps-ensure-customers-basic-needs-amid-corona-60262">https://www.tbsnews.net/bangladesh/daraz-takes-steps-ensure-customers-basic-needs-amid-corona-60262</a>                                                 | <b>Daraz takes steps to ensure customers basic needs amid corona</b>                  |
| 24/03/2020              | <a href="https://www.tbsnews.net/coronavirus-chronicle/coronavirus-bangladesh/jica-give-five-pcr-machines-60292">https://www.tbsnews.net/coronavirus-chronicle/coronavirus-bangladesh/jica-give-five-pcr-machines-60292</a>                                           | <b>Jica to give five PCR machines</b>                                                 |
| 24/03/2020              | <a href="https://www.tbsnews.net/bangladesh/brac-unilever-jointly-work-against-coronavirus-60397">https://www.tbsnews.net/bangladesh/brac-unilever-jointly-work-against-coronavirus-60397</a>                                                                         | <b>BRAC, Unilever jointly work against coronavirus</b>                                |
| 24/03/2020              | <a href="https://www.tbsnews.net/glitz/meena-teaches-children-how-fight-deadly-virus-60364">https://www.tbsnews.net/glitz/meena-teaches-children-how-fight-deadly-virus-60364</a>                                                                                     | <b>Meena' teaches children how to fight the deadly virus</b>                          |
| 24/03/2020              | <a href="https://www.tbsnews.net/coronavirus-chronicle/coronavirus-bangladesh/residents-fear-short-supply-shops-shutting-down-60337">https://www.tbsnews.net/coronavirus-chronicle/coronavirus-bangladesh/residents-fear-short-supply-shops-shutting-down-60337</a>   | <b>Residents in fear of short supply as shops shutting down</b>                       |
| 24/03/2020              | <a href="https://www.tbsnews.net/coronavirus-chronicle/coronavirus-bangladesh/pathao-responses-coronavirus-pandemic-60508">https://www.tbsnews.net/coronavirus-chronicle/coronavirus-bangladesh/pathao-responses-coronavirus-pandemic-60508</a>                       | <b>Pathao responses to coronavirus pandemic</b>                                       |
|                         |                                                                                                                                                                                                                                                                       |                                                                                       |
| 24/03/2020              | <a href="https://www.tbsnews.net/coronavirus-chronicle/coronavirus-bangladesh/mjf-donates-one-day-salary-gonoshasthaya-make-corona">https://www.tbsnews.net/coronavirus-chronicle/coronavirus-bangladesh/mjf-donates-one-day-salary-gonoshasthaya-make-corona</a>     | <b>MJF donates one-day salary to Gonoshasthaya to make corona testing kit</b>         |
| 24/03/2020              | <a href="https://www.tbsnews.net/coronavirus-chronicle/coronavirus-bangladesh/local-representatives-working-curb-coronavirus-tazul">https://www.tbsnews.net/coronavirus-chronicle/coronavirus-bangladesh/local-representatives-working-curb-coronavirus-tazul</a>     | <b>Local representatives working to curb coronavirus: Tazul</b>                       |
| 24/03/2020              | <a href="https://www.tbsnews.net/coronavirus-chronicle/coronavirus-bangladesh/anwer-khan-modern-hospitals-icu-team-quarantined-60505">https://www.tbsnews.net/coronavirus-chronicle/coronavirus-bangladesh/anwer-khan-modern-hospitals-icu-team-quarantined-60505</a> | <b>Anwer Khan Modern Hospital's ICU team quarantined</b>                              |
| 24/03/2020              | <a href="https://www.tbsnews.net/coronavirus-chronicle/coronavirus-bangladesh/shibchar-people-want-protect-themselves-60622">https://www.tbsnews.net/coronavirus-chronicle/coronavirus-bangladesh/shibchar-people-want-protect-themselves-60622</a>                   | <b>In Shibchar, people want to protect themselves</b>                                 |
| 24/03/2020              | <a href="https://www.tbsnews.net/coronavirus-chronicle/coronavirus-bangladesh/chattogram-doctors-rejecting-flu-patients-60469">https://www.tbsnews.net/coronavirus-chronicle/coronavirus-bangladesh/chattogram-doctors-rejecting-flu-patients-60469</a>               | <b>Chattogram doctors rejecting flu patients due to lack of PPE</b>                   |
| 24/03/2020              | <a href="https://www.tbsnews.net/economy/banking/hsbc-bangladesh-promises-support-its-customers-during-challenging-time-60553">https://www.tbsnews.net/economy/banking/hsbc-bangladesh-promises-support-its-customers-during-challenging-time-60553</a>               | <b>HSBC Bangladesh promises to support its customers during this challenging time</b> |
| 25/03/2020              | <a href="https://www.tbsnews.net/bangladesh/health/standard-bank-distributes-free-hand-sanitizer-among-people-61042">https://www.tbsnews.net/bangladesh/health/standard-bank-distributes-free-hand-sanitizer-among-people-61042</a>                                   | <b>Standard Bank distributes free hand sanitizer among people</b>                     |

| <b>Date of the news</b> | <b>News URL</b>                                                                                                                                                                                                                                                         | <b>Title of the news</b>                                                               |
|-------------------------|-------------------------------------------------------------------------------------------------------------------------------------------------------------------------------------------------------------------------------------------------------------------------|----------------------------------------------------------------------------------------|
| 25/03/2020              | <a href="https://www.tbsnews.net/companies/rangs-motors-starts-disinfection-program-terminals-61060">https://www.tbsnews.net/companies/rangs-motors-starts-disinfection-program-terminals-61060</a>                                                                     | <b>Rangs Motors starts disinfection program at terminals</b>                           |
| 25/03/2020              | <a href="https://www.tbsnews.net/companies/telecom/huawei-joins-hands-bangladesh-combat-covid-19-60997">https://www.tbsnews.net/companies/telecom/huawei-joins-hands-bangladesh-combat-covid-19-60997</a>                                                               | <b>Huawei joins hands with Bangladesh to combat Covid-19</b>                           |
| 25/03/2020              | <a href="https://www.tbsnews.net/coronavirus-chronicle/coronavirus-bangladesh/no-hospital-can-refuse-treat-any-patient-health">https://www.tbsnews.net/coronavirus-chronicle/coronavirus-bangladesh/no-hospital-can-refuse-treat-any-patient-health</a>                 | <b>No hospital can refuse to treat any patient: Health Ministry</b>                    |
| 25/03/2020              | <a href="https://www.tbsnews.net/coronavirus-chronicle/coronavirus-bangladesh/rehab-gives-tk25-lakh-govt-collect-coronavirus-test-kit">https://www.tbsnews.net/coronavirus-chronicle/coronavirus-bangladesh/rehab-gives-tk25-lakh-govt-collect-coronavirus-test-kit</a> | <b>REHAB donates Tk25 lakh to govt for buying coronavirus kits</b>                     |
| 25/03/2020              | <a href="https://www.tbsnews.net/international/sex-workers-one-worlds-largest-brothels-appeal-funds-due-coronavirus-60967">https://www.tbsnews.net/international/sex-workers-one-worlds-largest-brothels-appeal-funds-due-coronavirus-60967</a>                         | <b>Sex workers in one of world's largest brothels appeal for funds due coronavirus</b> |
| 25/03/2020              | <a href="https://www.tbsnews.net/tech/corona-crisis-tech-start-applye-lends-hand-local-firms-61003">https://www.tbsnews.net/tech/corona-crisis-tech-start-applye-lends-hand-local-firms-61003</a>                                                                       | <b>Corona crisis: Tech start-up Applye lends hand to local firms</b>                   |
| 25/03/2020              | <a href="https://www.tbsnews.net/economy/industry/apparel-factories-no-orders-can-shut-61078">https://www.tbsnews.net/economy/industry/apparel-factories-no-orders-can-shut-61078</a>                                                                                   | <b>Apparel factories with no orders can shut</b>                                       |
| 25/03/2020              | <a href="https://www.tbsnews.net/coronavirus-chronicle/coronavirus-bangladesh/chattogram-yet-get-coronavirus-testing-kits-61036">https://www.tbsnews.net/coronavirus-chronicle/coronavirus-bangladesh/chattogram-yet-get-coronavirus-testing-kits-61036</a>             | <b>Chattogram yet to get coronavirus testing kits</b>                                  |
| 25/03/2020              | <a href="https://www.tbsnews.net/coronavirus-chronicle/coronavirus-bangladesh/india-provides-masks-head-cover-bangladesh-60868">https://www.tbsnews.net/coronavirus-chronicle/coronavirus-bangladesh/india-provides-masks-head-cover-bangladesh-60868</a>               | <b>India provides masks, head-cover to Bangladesh</b>                                  |
| 25/03/2020              | <a href="https://www.tbsnews.net/coronavirus-chronicle/coronavirus-bangladesh/evaly-deliver-daily-commodities-customers-doorstep">https://www.tbsnews.net/coronavirus-chronicle/coronavirus-bangladesh/evaly-deliver-daily-commodities-customers-doorstep</a>           | <b>Evaly offers home delivery for daily commodities</b>                                |
| 25/03/2020              | <a href="https://www.tbsnews.net/companies/bkash-customers-allowed-add-money-visa-card-60742">https://www.tbsnews.net/companies/bkash-customers-allowed-add-money-visa-card-60742</a>                                                                                   | <b>bKash introduces add money service from Visa to contain corona spread</b>           |
| 26/03/2020              | <a href="https://www.tbsnews.net/coronavirus-chronicle/coronavirus-bangladesh/when-flowers-seem-grenades-love-still-flowers-61444">https://www.tbsnews.net/coronavirus-chronicle/coronavirus-bangladesh/when-flowers-seem-grenades-love-still-flowers-61444</a>         | <b>When flowers seem like grenades and love still flowers</b>                          |
| 26/03/2020              | <a href="https://www.tbsnews.net/economy/rmg/bgmea-pleas-close-garment-factories-amid-virus-scare-61570">https://www.tbsnews.net/economy/rmg/bgmea-pleas-close-garment-factories-amid-virus-scare-61570</a>                                                             | <b>BGMEA pleas to close garment factories amid virus scare</b>                         |
| 26/03/2020              | <a href="https://www.tbsnews.net/bangladesh/health/digital-healthcare-launches-free-online-coronavirus-symptom-checkup-61522">https://www.tbsnews.net/bangladesh/health/digital-healthcare-launches-free-online-coronavirus-symptom-checkup-61522</a>                   | <b>Digital Healthcare launches free online coronavirus symptom checkup</b>             |
| 26/03/2020              | <a href="https://www.tbsnews.net/bangladesh/30-tv-stations-under-govt-scanner-check-coronavirus-rumours-61519">https://www.tbsnews.net/bangladesh/30-tv-stations-under-govt-scanner-check-coronavirus-rumours-61519</a>                                                 | <b>30 TV stations under govt scanner to check coronavirus rumours</b>                  |
| 26/03/2020              | <a href="https://www.tbsnews.net/coronavirus-chronicle/coronavirus-bangladesh/8-more-labs-carry-out-coronavirus-tests-61462">https://www.tbsnews.net/coronavirus-chronicle/coronavirus-bangladesh/8-more-labs-carry-out-coronavirus-tests-61462</a>                     | <b>8 labs not yet ready for coronavirus test</b>                                       |
| 26/03/2020              | <a href="https://www.tbsnews.net/glitz/bongobd-makes-premium-contents-free-its-subscribers-61234">https://www.tbsnews.net/glitz/bongobd-makes-premium-contents-free-its-subscribers-61234</a>                                                                           | <b>'Bongobd' makes premium contents free for its subscribers</b>                       |

| <b>Date of the news</b> | <b>News URL</b>                                                                                                                                                                                                                                                         | <b>Title of the news</b>                                                         |
|-------------------------|-------------------------------------------------------------------------------------------------------------------------------------------------------------------------------------------------------------------------------------------------------------------------|----------------------------------------------------------------------------------|
| 26/03/2020              | <a href="https://www.tbsnews.net/bangladesh/energy/prepaid-household-gas-consumers-get-emergency-balance-tk-2000-61408">https://www.tbsnews.net/bangladesh/energy/prepaid-household-gas-consumers-get-emergency-balance-tk-2000-61408</a>                               | <b>Titas, Karnaphuli Gas increase emergency balance for domestic users</b>       |
| 26/03/2020              | <a href="https://www.tbsnews.net/coronavirus-chronicle/coronavirus-bangladesh/niketan-takes-extraordinary-steps-protect-residents">https://www.tbsnews.net/coronavirus-chronicle/coronavirus-bangladesh/niketan-takes-extraordinary-steps-protect-residents</a>         | <b>Niketan takes extraordinary steps to protect residents</b>                    |
| 26/03/2020              | <a href="https://www.tbsnews.net/economy/trade/online-shopping-surges-no-one-deliver-goods-61561">https://www.tbsnews.net/economy/trade/online-shopping-surges-no-one-deliver-goods-61561</a>                                                                           | <b>Online shopping surges, but no one to deliver goods</b>                       |
| 27/03/2020              | <a href="https://www.tbsnews.net/coronavirus-chronicle/coronavirus-bangladesh/clifton-group-donating-10-lakh-masks-chattogram-61690">https://www.tbsnews.net/coronavirus-chronicle/coronavirus-bangladesh/clifton-group-donating-10-lakh-masks-chattogram-61690</a>     | <b>Clifton Group donating 10 lakh masks in Chattogram</b>                        |
| 27/03/2020              | <a href="https://www.tbsnews.net/coronavirus-chronicle/coronavirus-bangladesh/bidyanondo-distribute-foods-among-people-worst-hit">https://www.tbsnews.net/coronavirus-chronicle/coronavirus-bangladesh/bidyanondo-distribute-foods-among-people-worst-hit</a>           | <b>Bidyanondo to distribute foods among people worst hit by lockdown</b>         |
| 27/03/2020              | <a href="https://www.tbsnews.net/coronavirus-chronicle/coronavirus-bangladesh/police-enforce-social-distancing-through-humiliation">https://www.tbsnews.net/coronavirus-chronicle/coronavirus-bangladesh/police-enforce-social-distancing-through-humiliation</a>       | <b>Police enforce social distancing through humiliation, harassment</b>          |
| 27/03/2020              | <a href="https://www.tbsnews.net/coronavirus-chronicle/coronavirus-bangladesh/covid-19-are-we-preparing-homeless-and-slum-dwellers">https://www.tbsnews.net/coronavirus-chronicle/coronavirus-bangladesh/covid-19-are-we-preparing-homeless-and-slum-dwellers</a>       | <b>COVID-19: Are we preparing the homeless and slum-dwellers?</b>                |
| 27/03/2020              | <a href="https://www.tbsnews.net/coronavirus-chronicle/coronavirus-bangladesh/factories-making-protective-gears-having-buying-orders">https://www.tbsnews.net/coronavirus-chronicle/coronavirus-bangladesh/factories-making-protective-gears-having-buying-orders</a>   | <b>Factories making protective gears, having buying orders need not to close</b> |
| 27/03/2020              | <a href="https://www.tbsnews.net/bangladesh/child-protection-priority-curbing-coronavirus-spread-61816">https://www.tbsnews.net/bangladesh/child-protection-priority-curbing-coronavirus-spread-61816</a>                                                               | <b>'Child protection a priority in curbing coronavirus spread'</b>               |
| 27/03/2020              | <a href="https://www.tbsnews.net/economy/rmg/accord-suspends-inspections-bangladesh-amid-corona-fear-61882">https://www.tbsnews.net/economy/rmg/accord-suspends-inspections-bangladesh-amid-corona-fear-61882</a>                                                       | <b>Accord suspends inspections in Bangladesh amid corona fear</b>                |
| 27/03/2020              | <a href="https://www.tbsnews.net/coronavirus-chronicle/coronavirus-bangladesh/bangladesh-receives-30000-coronavirus-testing-kits-jack">https://www.tbsnews.net/coronavirus-chronicle/coronavirus-bangladesh/bangladesh-receives-30000-coronavirus-testing-kits-jack</a> | <b>Bangladesh receives Covid-19 testing kits from Jack Ma</b>                    |
| 27/03/2020              | <a href="https://www.tbsnews.net/bangladesh/shutdown-misery-daily-wage-earners-61909">https://www.tbsnews.net/bangladesh/shutdown-misery-daily-wage-earners-61909</a>                                                                                                   | <b>Shutdown a misery for daily wage-earners</b>                                  |
| 27/03/2020              | <a href="https://www.tbsnews.net/bangladesh/keeping-us-clean-risking-their-lives-61873">https://www.tbsnews.net/bangladesh/keeping-us-clean-risking-their-lives-61873</a>                                                                                               | <b>Keeping us clean, risking their lives</b>                                     |
| 28/03/2020              | <a href="https://www.tbsnews.net/coronavirus-chronicle/coronavirus-bangladesh/gulshan-people-join-hands-keep-corona-bay-62032">https://www.tbsnews.net/coronavirus-chronicle/coronavirus-bangladesh/gulshan-people-join-hands-keep-corona-bay-62032</a>                 | <b>Gulshan people join hands to keep corona at bay</b>                           |
| 28/03/2020              | <a href="https://www.tbsnews.net/coronavirus-chronicle/coronavirus-bangladesh/beximco-provides-ppe-healthcare-professionals-62179">https://www.tbsnews.net/coronavirus-chronicle/coronavirus-bangladesh/beximco-provides-ppe-healthcare-professionals-62179</a>         | <b>Beximco provides PPE to healthcare professionals</b>                          |
| 28/03/2020              | <a href="https://www.tbsnews.net/coronavirus-chronicle/covid-19-bangladesh/bad-days-ahead-daily-wage-earners-62272">https://www.tbsnews.net/coronavirus-chronicle/covid-19-bangladesh/bad-days-ahead-daily-wage-earners-62272</a>                                       | <b>Bad days ahead for daily wage-earners</b>                                     |
| 28/03/2020              | <a href="https://www.tbsnews.net/bangladesh/govt-delivering-aid-ultra-poor-families-doorstep-62269">https://www.tbsnews.net/bangladesh/govt-delivering-aid-ultra-poor-families-doorstep-62269</a>                                                                       | <b>Govt delivering aid to ultra-poor families' doorstep</b>                      |

| <b>Date of the news</b> | <b>News URL</b>                                                                                                                                                                                                                                                     | <b>Title of the news</b>                                                     |
|-------------------------|---------------------------------------------------------------------------------------------------------------------------------------------------------------------------------------------------------------------------------------------------------------------|------------------------------------------------------------------------------|
| 28/03/2020              | <a href="https://www.tbsnews.net/coronavirus-chronicle/coronavirus-bangladesh/disinfectants-be-sprayed-each-area-capital-lgrd">https://www.tbsnews.net/coronavirus-chronicle/coronavirus-bangladesh/disinfectants-be-sprayed-each-area-capital-lgrd</a>             | <b>Disinfectants to be sprayed in each area of capital: LGRD minister</b>    |
| 28/03/2020              | <a href="https://www.tbsnews.net/economy/chattogram-small-traders-fight-survival-62155">https://www.tbsnews.net/economy/chattogram-small-traders-fight-survival-62155</a>                                                                                           | <b>Chattogram small traders fight for survival</b>                           |
| 28/03/2020              | <a href="https://www.tbsnews.net/coronavirus-chronicle/coronavirus-bangladesh/chattograms-low-income-workers-great-risk-62104">https://www.tbsnews.net/coronavirus-chronicle/coronavirus-bangladesh/chattograms-low-income-workers-great-risk-62104</a>             | <b>Chattogram's low-income workers at great risk</b>                         |
| 28/03/2020              | <a href="https://www.tbsnews.net/coronavirus-chronicle/coronavirus-bangladesh/charity-defines-bangladesh-during-crisis-62086">https://www.tbsnews.net/coronavirus-chronicle/coronavirus-bangladesh/charity-defines-bangladesh-during-crisis-62086</a>               | <b>Charity that defines Bangladesh during crisis</b>                         |
| 28/03/2020              | <a href="https://www.tbsnews.net/coronavirus-chronicle/coronavirus-bangladesh/adb-provide-300000-support-bangladeshs-fight-against">https://www.tbsnews.net/coronavirus-chronicle/coronavirus-bangladesh/adb-provide-300000-support-bangladeshs-fight-against</a>   | <b>ADB to provide \$300,000 to support Bangladesh's fight against corona</b> |
| 28/03/2020              | <a href="https://www.tbsnews.net/bangladesh/no-protection-conservancy-workers-chattogram-62077">https://www.tbsnews.net/bangladesh/no-protection-conservancy-workers-chattogram-62077</a>                                                                           | <b>No protection for conservancy workers in Chattogram</b>                   |
| 29/03/2020              | <a href="https://www.tbsnews.net/companies/fbcci-provide-health-safety-equipment-healthcare-professionals-62605">https://www.tbsnews.net/companies/fbcci-provide-health-safety-equipment-healthcare-professionals-62605</a>                                         | <b>FBCCI to provide health safety equipment to healthcare professionals</b>  |
|                         | <a href="https://www.tbsnews.net/coronavirus-chronicle/covid-19-bangladesh/bashundhara-proposes-build-5000-bed-coronavirus-hospital">https://www.tbsnews.net/coronavirus-chronicle/covid-19-bangladesh/bashundhara-proposes-build-5000-bed-coronavirus-hospital</a> | <b>Bashundhara offers to build 5,000-bed coronavirus hospital</b>            |
|                         | <a href="https://www.tbsnews.net/coronavirus-chronicle/covid-19-bangladesh/bgmea-plans-make-20000-ppe-suits-rubana-huq-62536">https://www.tbsnews.net/coronavirus-chronicle/covid-19-bangladesh/bgmea-plans-make-20000-ppe-suits-rubana-huq-62536</a>               | <b>BGMEA plans to make 20,000 PPE suits: Rubana Huq</b>                      |
|                         | <a href="https://www.tbsnews.net/coronavirus-chronicle/covid-19-bangladesh/rmg-factories-step-make-5-lakh-ppe-62374">https://www.tbsnews.net/coronavirus-chronicle/covid-19-bangladesh/rmg-factories-step-make-5-lakh-ppe-62374</a>                                 | <b>RMG factories step up to make 5 lakh PPE</b>                              |
|                         | <a href="https://www.tbsnews.net/coronavirus-chronicle/covid-19-bangladesh/corporates-lending-hand-fight-virus-62479">https://www.tbsnews.net/coronavirus-chronicle/covid-19-bangladesh/corporates-lending-hand-fight-virus-62479</a>                               | <b>Corporates lending a hand to fight virus</b>                              |
|                         | <a href="https://www.tbsnews.net/coronavirus-chronicle/covid-19-bangladesh/jack-ma-donates-30000-more-coronavirus-testing-kits">https://www.tbsnews.net/coronavirus-chronicle/covid-19-bangladesh/jack-ma-donates-30000-more-coronavirus-testing-kits</a>           | <b>Jack Ma donates 30,000 more coronavirus testing kits to Bangladesh</b>    |
|                         | <a href="https://www.tbsnews.net/coronavirus-chronicle/covid-19-bangladesh/bpo-transport-ppes-test-kits-civil-surgeon-offices-62470">https://www.tbsnews.net/coronavirus-chronicle/covid-19-bangladesh/bpo-transport-ppes-test-kits-civil-surgeon-offices-62470</a> | <b>Postal service launches nationwide free delivery of medical equipment</b> |
|                         | <a href="https://www.tbsnews.net/coronavirus-chronicle/covid-19-bangladesh/patient-contact-without-ppe-sends-more-doctors-nurses">https://www.tbsnews.net/coronavirus-chronicle/covid-19-bangladesh/patient-contact-without-ppe-sends-more-doctors-nurses</a>       | <b>Patient contact without PPE sends more doctors, nurses to quarantine</b>  |
|                         | <a href="https://www.tbsnews.net/coronavirus-chronicle/covid-19-bangladesh/bangladeshi-physician-sending-ppe-china-62419">https://www.tbsnews.net/coronavirus-chronicle/covid-19-bangladesh/bangladeshi-physician-sending-ppe-china-62419</a>                       | <b>Bangladeshi physician sending PPE from China</b>                          |
|                         | <a href="https://www.tbsnews.net/coronavirus-chronicle/covid-19-bangladesh/not-coronavirus-its-hunger-we-fear-62395">https://www.tbsnews.net/coronavirus-chronicle/covid-19-bangladesh/not-coronavirus-its-hunger-we-fear-62395</a>                                 | <b>'Not coronavirus, it's hunger that we fear'</b>                           |

| Date of the news | News URL                                                                                                                                                                                                                                                                | Title of the news                                                                                                         |
|------------------|-------------------------------------------------------------------------------------------------------------------------------------------------------------------------------------------------------------------------------------------------------------------------|---------------------------------------------------------------------------------------------------------------------------|
|                  | <a href="https://www.tbsnews.net/coronavirus-chronicle/covid-19-bangladesh/saber-chowdhury-donates-700-ppe-mugda-hospital-62335">https://www.tbsnews.net/coronavirus-chronicle/covid-19-bangladesh/saber-chowdhury-donates-700-ppe-mugda-hospital-62335</a>             | <b>Saber Chowdhury donates 700 PPE to Mugda hospital</b>                                                                  |
| 03/30/2020       | <a href="https://www.tbsnews.net/coronavirus-chronicle/covid-19-bangladesh/govt-media-work-together-tackle-coronavirus-crisis-hasan">https://www.tbsnews.net/coronavirus-chronicle/covid-19-bangladesh/govt-media-work-together-tackle-coronavirus-crisis-hasan</a>     | <b>Govt, media to work together to tackle coronavirus crisis: Hasan</b>                                                   |
|                  | <a href="https://www.tbsnews.net/coronavirus-chronicle/covid-19-bangladesh/low-income-people-get-food-support-countrywide-ministry">https://www.tbsnews.net/coronavirus-chronicle/covid-19-bangladesh/low-income-people-get-food-support-countrywide-ministry</a>       | <b>Low-income people to get food support countrywide: Ministry</b>                                                        |
|                  | <a href="https://www.tbsnews.net/bangladesh/health/inmates-face-coronavirus-risk-crowded-jails-62860">https://www.tbsnews.net/bangladesh/health/inmates-face-coronavirus-risk-crowded-jails-62860</a>                                                                   | <b>Inmates face coronavirus risk in crowded jails</b>                                                                     |
|                  | <a href="https://www.tbsnews.net/coronavirus-chronicle/covid-19-bangladesh/coronavirus-us-bangla-provide-ppe-medical-college">https://www.tbsnews.net/coronavirus-chronicle/covid-19-bangladesh/coronavirus-us-bangla-provide-ppe-medical-college</a>                   | <b>Coronavirus: US Bangla to provide PPE to medical college hospitals free of cost</b>                                    |
|                  | <a href="https://www.tbsnews.net/coronavirus-chronicle/covid-19-bangladesh/just-45-ventilators-fight-against-coronavirus-62704">https://www.tbsnews.net/coronavirus-chronicle/covid-19-bangladesh/just-45-ventilators-fight-against-coronavirus-62704</a>               | <b>Just 45 ventilators in fight against coronavirus</b>                                                                   |
|                  | <a href="https://www.tbsnews.net/companies/walton-gives-employees-tk77cr-profit-earnings-62695">https://www.tbsnews.net/companies/walton-gives-employees-tk77cr-profit-earnings-62695</a>                                                                               | <b>Walton gives employees Tk77cr from profit earnings</b>                                                                 |
|                  | <a href="https://www.tbsnews.net/economy/sadarghat-boatmen-bear-brunt-shutdown-62683">https://www.tbsnews.net/economy/sadarghat-boatmen-bear-brunt-shutdown-62683</a>                                                                                                   | <b>Sadarghat boatmen bear brunt of shutdown</b>                                                                           |
|                  | <a href="https://www.tbsnews.net/coronavirus-chronicle/covid-19-bangladesh/modality-pms-tk5000-crore-covid-19-fund-be-set-today-62677">https://www.tbsnews.net/coronavirus-chronicle/covid-19-bangladesh/modality-pms-tk5000-crore-covid-19-fund-be-set-today-62677</a> | <b>Modality for PM's Tk5,000 crore Covid-19 fund to be set today</b>                                                      |
|                  | <a href="https://www.tbsnews.net/coronavirus-chronicle/covid-19-bangladesh/coronavirus-army-donates-tk-25cr-pms-relief-fund-62650">https://www.tbsnews.net/coronavirus-chronicle/covid-19-bangladesh/coronavirus-army-donates-tk-25cr-pms-relief-fund-62650</a>         | <b>Coronavirus: Army donates Tk 25cr to PM's relief fund</b>                                                              |
|                  | <a href="https://www.tbsnews.net/coronavirus-chronicle/covid-19-bangladesh/clean-green-bangladesh-and-garib-foundation-distribute">https://www.tbsnews.net/coronavirus-chronicle/covid-19-bangladesh/clean-green-bangladesh-and-garib-foundation-distribute</a>         | <b>Clean Green Bangladesh and Garib Foundation distribute food items in Dhaka</b>                                         |
|                  | <a href="https://www.tbsnews.net/coronavirus-chronicle/covid-19-bangladesh/momtaz-partners-brac-calls-defeat-coronavirus-63001">https://www.tbsnews.net/coronavirus-chronicle/covid-19-bangladesh/momtaz-partners-brac-calls-defeat-coronavirus-63001</a>               | <b>Folk queen partners with Brac to fight coronavirus socially</b>                                                        |
|                  | <a href="https://www.tbsnews.net/bangladesh/health/stadiums-can-be-used-hospitals-coronavirus-patients-63007">https://www.tbsnews.net/bangladesh/health/stadiums-can-be-used-hospitals-coronavirus-patients-63007</a>                                                   | <b>'Stadiums can be used as hospitals for coronavirus patients'</b>                                                       |
|                  | <a href="https://www.tbsnews.net/coronavirus-chronicle/covid-19-bangladesh/17-more-labs-be-set-corona-sample-test-health-minister">https://www.tbsnews.net/coronavirus-chronicle/covid-19-bangladesh/17-more-labs-be-set-corona-sample-test-health-minister</a>         | <b>17 more labs to be set up for corona sample test: health minister</b><br><br><i>(P.S Not sure if private included)</i> |
|                  | <a href="https://www.tbsnews.net/coronavirus-chronicle/covid-19-bangladesh/summit-group-provides-govt-tk3-crore-fight-coronavirus">https://www.tbsnews.net/coronavirus-chronicle/covid-19-bangladesh/summit-group-provides-govt-tk3-crore-fight-coronavirus</a>         | <b>Summit Group provides govt Tk3 crore to fight coronavirus</b>                                                          |
|                  | <a href="https://www.tbsnews.net/economy/banking/prime-bank-takes-measures-fight-coronavirus-spread-62983">https://www.tbsnews.net/economy/banking/prime-bank-takes-measures-fight-coronavirus-spread-62983</a>                                                         | <b>Prime Bank takes measures to fight coronavirus spread</b>                                                              |



| Date of the news | News URL                                                                                                                                                                                                                                                                | Title of the news                                                                           |
|------------------|-------------------------------------------------------------------------------------------------------------------------------------------------------------------------------------------------------------------------------------------------------------------------|---------------------------------------------------------------------------------------------|
|                  | <a href="https://www.tbsnews.net/coronavirus-chronicle/covid-19-bangladesh/coronavirus-police-donate-boishakhi-allowance-pms-relief">https://www.tbsnews.net/coronavirus-chronicle/covid-19-bangladesh/coronavirus-police-donate-boishakhi-allowance-pms-relief</a>     | <b>Coronavirus: Police to donate Boishakhi allowance to PM's relief and welfare fund</b>    |
|                  | <a href="https://www.tbsnews.net/coronavirus-chronicle/covid-19-bangladesh/coronavirus-islamic-foundation-issues-guidelines-over">https://www.tbsnews.net/coronavirus-chronicle/covid-19-bangladesh/coronavirus-islamic-foundation-issues-guidelines-over</a>           | <b>Coronavirus: Islamic Foundation issues guidelines over namaz, safety</b>                 |
|                  | <a href="https://www.tbsnews.net/bangladesh/cmp-along-ksrm-lend-hand-3000-families-62959">https://www.tbsnews.net/bangladesh/cmp-along-ksrm-lend-hand-3000-families-62959</a>                                                                                           | <b>CMP along with KSRM lend a hand to 3,000 families</b>                                    |
|                  | <a href="https://www.tbsnews.net/bangladesh/crime/man-fined-selling-cough-syrup-coronavirus-vaccine-62947">https://www.tbsnews.net/bangladesh/crime/man-fined-selling-cough-syrup-coronavirus-vaccine-62947</a>                                                         | <b>Man fined for selling cough syrup as coronavirus vaccine</b>                             |
|                  | <a href="https://www.tbsnews.net/coronavirus-chronicle/covid-19-bangladesh/ucb-donates-pms-relief-fund-tackle-coronavirus-62950">https://www.tbsnews.net/coronavirus-chronicle/covid-19-bangladesh/ucb-donates-pms-relief-fund-tackle-coronavirus-62950</a>             | <b>UCB donates to PM's relief fund to tackle coronavirus</b>                                |
|                  | <a href="https://www.tbsnews.net/bangladesh/ccnf-holds-online-press-conference-journalists-dhaka-and-coxs-bazar-62998">https://www.tbsnews.net/bangladesh/ccnf-holds-online-press-conference-journalists-dhaka-and-coxs-bazar-62998</a>                                 | <b>CCNF holds online press conference with journalists from Dhaka and Cox's Bazar</b>       |
|                  | <a href="https://www.tbsnews.net/coronavirus-chronicle/covid-19-bangladesh/virus-fallout-forces-many-chattogram-domestic-workers-beg">https://www.tbsnews.net/coronavirus-chronicle/covid-19-bangladesh/virus-fallout-forces-many-chattogram-domestic-workers-beg</a>   | <b>Virus fallout forces many of Chattogram domestic workers to beg</b>                      |
| 03/31/2020       | <a href="https://www.tbsnews.net/economy/protecting-people-economy-top-priority-finance-minister-63490">https://www.tbsnews.net/economy/protecting-people-economy-top-priority-finance-minister-63490</a>                                                               | <b>Protecting people, economy is top priority: Finance minister</b>                         |
|                  | <a href="https://www.tbsnews.net/coronavirus-chronicle/covid-19-bangladesh/navana-group-give-2-storey-building-chattogram-corona">https://www.tbsnews.net/coronavirus-chronicle/covid-19-bangladesh/navana-group-give-2-storey-building-chattogram-corona</a>           | <b>Navana group to give 2-storey building in Chattogram for corona hospital</b>             |
|                  | <a href="https://www.tbsnews.net/coronavirus-chronicle/covid-19-bangladesh/coxs-bazar-communities-making-masks-aid-fight-against">https://www.tbsnews.net/coronavirus-chronicle/covid-19-bangladesh/coxs-bazar-communities-making-masks-aid-fight-against</a>           | <b>Cox's Bazar communities making masks to aid fight against Covid-19</b>                   |
|                  | <a href="https://www.tbsnews.net/coronavirus-chronicle/covid-19-bangladesh/us-bangla-group-set-temporary-hospital-coronavirus">https://www.tbsnews.net/coronavirus-chronicle/covid-19-bangladesh/us-bangla-group-set-temporary-hospital-coronavirus</a>                 | <b>US-Bangla Group to set up temporary hospital for coronavirus patients in Narayanganj</b> |
|                  | <a href="https://www.tbsnews.net/coronavirus-chronicle/covid-19-bangladesh/rajshahi-district-administration-launches-mobile-vegetable">https://www.tbsnews.net/coronavirus-chronicle/covid-19-bangladesh/rajshahi-district-administration-launches-mobile-vegetable</a> | <b>Rajshahi district administration launches mobile vegetable market</b>                    |
|                  | <a href="https://www.tbsnews.net/coronavirus-chronicle/covid-19-bangladesh/fbcci-spray-disinfectant-narayanganj-uttara-63430">https://www.tbsnews.net/coronavirus-chronicle/covid-19-bangladesh/fbcci-spray-disinfectant-narayanganj-uttara-63430</a>                   | <b>FBCCI to spray disinfectant Narayanganj-Uttara</b>                                       |
|                  | <a href="https://www.tbsnews.net/coronavirus-chronicle/covid-19-bangladesh/rumours-over-coronavirus-police-looking-82-admins-social">https://www.tbsnews.net/coronavirus-chronicle/covid-19-bangladesh/rumours-over-coronavirus-police-looking-82-admins-social</a>     | <b>Police looking for 82 admins of social media pages</b>                                   |
|                  | <a href="https://www.tbsnews.net/companies/walton-make-life-saving-medical-equipment-ventilators-63421">https://www.tbsnews.net/companies/walton-make-life-saving-medical-equipment-ventilators-63421</a>                                                               | <b>Walton to make life-saving medical equipment</b>                                         |
|                  | <a href="https://www.tbsnews.net/coronavirus-chronicle/covid-19-bangladesh/young-engineers-claim-have-developed-robot-handle-covid">https://www.tbsnews.net/coronavirus-chronicle/covid-19-bangladesh/young-engineers-claim-have-developed-robot-handle-covid</a>       | <b>Young engineers claim to have developed robot to handle COVID patients</b>               |

| <b>Date of the news</b> | <b>News URL</b>                                                                                                                                                                                                                                                         | <b>Title of the news</b>                                                                          |
|-------------------------|-------------------------------------------------------------------------------------------------------------------------------------------------------------------------------------------------------------------------------------------------------------------------|---------------------------------------------------------------------------------------------------|
|                         | <a href="https://www.tbsnews.net/coronavirus-chronicle/covid-19-bangladesh/pran-rfl-group-sets-isolation-unit-natore-63361">https://www.tbsnews.net/coronavirus-chronicle/covid-19-bangladesh/pran-rfl-group-sets-isolation-unit-natore-63361</a>                       | <b>PRAN-RFL Group sets up isolation unit in Natore</b>                                            |
|                         | <a href="https://www.tbsnews.net/coronavirus-chronicle/covid-19-bangladesh/pran-rfl-prepares-isolation-unit-natore-treat-corona">https://www.tbsnews.net/coronavirus-chronicle/covid-19-bangladesh/pran-rfl-prepares-isolation-unit-natore-treat-corona</a>             | <b>PRAN-RFL prepares isolation unit in Natore to treat corona patient</b>                         |
|                         | <a href="https://www.tbsnews.net/bangladesh/commerce-minister-calls-homeowners-consider-workers-rents-sympathy-63358">https://www.tbsnews.net/bangladesh/commerce-minister-calls-homeowners-consider-workers-rents-sympathy-63358</a>                                   | <b>Commerce minister calls on homeowners to consider workers' rents with sympathy</b>             |
|                         | <a href="https://www.tbsnews.net/coronavirus-chronicle/covid-19-bangladesh/afc-health-fortis-heart-institute-opens-corona-care">https://www.tbsnews.net/coronavirus-chronicle/covid-19-bangladesh/afc-health-fortis-heart-institute-opens-corona-care</a>               | <b>AFC Health Fortis Heart Institute opens corona care hotline</b>                                |
|                         | <a href="https://www.tbsnews.net/coronavirus-chronicle/covid-19-bangladesh/china-committed-supporting-bangladesh-fighting-covid-19">https://www.tbsnews.net/coronavirus-chronicle/covid-19-bangladesh/china-committed-supporting-bangladesh-fighting-covid-19</a>       | <b>China committed to supporting Bangladesh in fighting Covid-19 pandemic: Chinese ambassador</b> |
|                         | <a href="https://www.tbsnews.net/coronavirus-chronicle/covid-19-bangladesh/lack-soap-water-failing-dhaka-wasas-noble-initiative-63274">https://www.tbsnews.net/coronavirus-chronicle/covid-19-bangladesh/lack-soap-water-failing-dhaka-wasas-noble-initiative-63274</a> | <b>Lack of soap, water failing Dhaka Wasa's noble initiative</b>                                  |
|                         | <a href="https://www.tbsnews.net/coronavirus-chronicle/covid-19-bangladesh/mill-owners-donate-50-tonnes-rice-day-labourers-bogura">https://www.tbsnews.net/coronavirus-chronicle/covid-19-bangladesh/mill-owners-donate-50-tonnes-rice-day-labourers-bogura</a>         | <b>Mill owners donate 50 tonnes rice for day labourers in Bogura</b>                              |
|                         | <a href="https://www.tbsnews.net/coronavirus-chronicle/covid-19-bangladesh/jubo-league-man-arrested-spreading-rumour-about">https://www.tbsnews.net/coronavirus-chronicle/covid-19-bangladesh/jubo-league-man-arrested-spreading-rumour-about</a>                       | <b>Jubo League man arrested for spreading rumour about coronavirus</b>                            |
|                         | <a href="https://www.tbsnews.net/coronavirus-chronicle/covid-19-bangladesh/fake-hand-sanitisers-selling-original-bottles-63181">https://www.tbsnews.net/coronavirus-chronicle/covid-19-bangladesh/fake-hand-sanitisers-selling-original-bottles-63181</a>               | <b>Fake hand sanitisers selling in original bottles</b>                                           |
| 01/04/2020              | <a href="https://www.tbsnews.net/economy/banking/36-private-banks-donate-tk137-crore-pms-fund-sunday-63955">https://www.tbsnews.net/economy/banking/36-private-banks-donate-tk137-crore-pms-fund-sunday-63955</a>                                                       | 36 private banks to donate Tk137 crore to PM's fund Sunday                                        |
| 01/04/2020              | <a href="https://www.tbsnews.net/bangladesh/telecom/gp-donate-50000-ppes-and-10000-pcr-kits-coronavirus-hospitals-63814">https://www.tbsnews.net/bangladesh/telecom/gp-donate-50000-ppes-and-10000-pcr-kits-coronavirus-hospitals-63814</a>                             | GP to donate 50,000 PPEs and 10,000 PCR kits to coronavirus hospitals                             |
| 01/04/2020              | <a href="https://www.tbsnews.net/coronavirus-chronicle/covid-19-bangladesh/rt-pcr-machine-can-test-96-samples-3-hours-detect">https://www.tbsnews.net/coronavirus-chronicle/covid-19-bangladesh/rt-pcr-machine-can-test-96-samples-3-hours-detect</a>                   | RT-PCR machine can test 96 samples in 3 hours to detect coronavirus                               |
| 01/04/2020              | <a href="https://www.tbsnews.net/coronavirus-chronicle/covid-19-bangladesh/tom-tailor-bangladesh-donate-staffs-one-day-salary-bgmea">https://www.tbsnews.net/coronavirus-chronicle/covid-19-bangladesh/tom-tailor-bangladesh-donate-staffs-one-day-salary-bgmea</a>     | Tom Tailor Bangladesh to donate staff's one day salary to BGMEA fund                              |
| 01/04/2020              | <a href="https://www.tbsnews.net/coronavirus-chronicle/covid-19-bangladesh/undp-united-group-join-hands-covid-19-response-63865">https://www.tbsnews.net/coronavirus-chronicle/covid-19-bangladesh/undp-united-group-join-hands-covid-19-response-63865</a>             | UNDP, United Group join hands for COVID-19 response                                               |
| 01/04/2020              | <a href="https://www.tbsnews.net/bangladesh/pathaos-tong-expands-its-geographical-reach-shwapno-63586">https://www.tbsnews.net/bangladesh/pathaos-tong-expands-its-geographical-reach-shwapno-63586</a>                                                                 | Pathao's 'tong' expands its geographical reach with Shwapno                                       |
| 01/04/2020              | <a href="https://www.tbsnews.net/coronavirus-chronicle/covid-19-bangladesh/govt-block-50-websites-82-facebook-pages-spreading-rumours">https://www.tbsnews.net/coronavirus-chronicle/covid-19-bangladesh/govt-block-50-websites-82-facebook-pages-spreading-rumours</a> | Govt to block 50 websites, 82 Facebook pages for spreading rumours                                |
| 01/04/2020              | <a href="https://www.tbsnews.net/coronavirus-chronicle/covid-19-bangladesh/relief-distribution-begins-bogura-63940">https://www.tbsnews.net/coronavirus-chronicle/covid-19-bangladesh/relief-distribution-begins-bogura-63940</a>                                       | Relief distribution begins in Bogura                                                              |

| Date of the news | News URL                                                                                                                                                                                                                                                                | Title of the news                                                     |
|------------------|-------------------------------------------------------------------------------------------------------------------------------------------------------------------------------------------------------------------------------------------------------------------------|-----------------------------------------------------------------------|
| 01/04/2020       | <a href="https://www.tbsnews.net/coronavirus-chronicle/covid-19-bangladesh/bangladesh-navy-distributes-relief-among-poor-chattogram">https://www.tbsnews.net/coronavirus-chronicle/covid-19-bangladesh/bangladesh-navy-distributes-relief-among-poor-chattogram</a>     | Bangladesh Navy distributes relief among poor in Chattogram           |
| 01/04/2020       | <a href="https://www.tbsnews.net/economy/trade/shop-owners-seek-tk2500-crore-financial-support-63976">https://www.tbsnews.net/economy/trade/shop-owners-seek-tk2500-crore-financial-support-63976</a>                                                                   | Shop owners seek Tk2,500 crore financial support                      |
| 01/04/2020       | <a href="https://www.tbsnews.net/coronavirus-chronicle/covid-19-bangladesh/owners-can-run-factories-if-they-want-commerce-minister">https://www.tbsnews.net/coronavirus-chronicle/covid-19-bangladesh/owners-can-run-factories-if-they-want-commerce-minister</a>       | Owners can run factories, if they want: Commerce minister             |
| 01/04/2020       | <a href="https://www.tbsnews.net/coronavirus-chronicle/covid-19-bangladesh/doctors-urged-provide-healthcare-services-patients-63877">https://www.tbsnews.net/coronavirus-chronicle/covid-19-bangladesh/doctors-urged-provide-healthcare-services-patients-63877</a>     | Doctors urged to provide healthcare services to patients              |
| 01/04/2020       | <a href="https://www.tbsnews.net/coronavirus-chronicle/covid-19-bangladesh/six-fined-spreading-rumours-over-coronavirus-barishal">https://www.tbsnews.net/coronavirus-chronicle/covid-19-bangladesh/six-fined-spreading-rumours-over-coronavirus-barishal</a>           | Six fined for spreading rumours over coronavirus in Barishal          |
| 01/04/2020       | <a href="https://www.tbsnews.net/bangladesh/crime/man-arrested-dhaka-spreading-rumours-over-coronavirus-63856">https://www.tbsnews.net/bangladesh/crime/man-arrested-dhaka-spreading-rumours-over-coronavirus-63856</a>                                                 | Man arrested in Dhaka for spreading rumours over coronavirus          |
| 01/04/2020       | <a href="https://www.tbsnews.net/coronavirus-chronicle/covid-19-bangladesh/mobile-court-fines-jti-tk-10000-raishahi-63847">https://www.tbsnews.net/coronavirus-chronicle/covid-19-bangladesh/mobile-court-fines-jti-tk-10000-raishahi-63847</a>                         | Mobile Court fines JTI Tk 10,000 in Rajshahi                          |
| 01/04/2020       | <a href="https://www.tbsnews.net/coronavirus-chronicle/covid-19-bangladesh/finance-ministry-reveals-guideline-tk5000cr-stimulus">https://www.tbsnews.net/coronavirus-chronicle/covid-19-bangladesh/finance-ministry-reveals-guideline-tk5000cr-stimulus</a>             | Finance Ministry reveals guideline for Tk5,000cr stimulus package     |
| 01/04/2020       | <a href="https://www.tbsnews.net/bangladesh/50-restaurant-staff-could-lose-jobs-63799">https://www.tbsnews.net/bangladesh/50-restaurant-staff-could-lose-jobs-63799</a>                                                                                                 | 50% restaurant staff could lose jobs                                  |
| 01/04/2020       | <a href="https://www.tbsnews.net/coronavirus-chronicle/covid-19-bangladesh/steps-taken-meet-milk-egg-fish-meat-crisis-minister-63772">https://www.tbsnews.net/coronavirus-chronicle/covid-19-bangladesh/steps-taken-meet-milk-egg-fish-meat-crisis-minister-63772</a>   | Steps taken to meet milk, egg, fish, meat crisis: Minister            |
| 01/04/2020       | <a href="https://www.tbsnews.net/panorama/empty-streets-humanity-forms-new-bonds-survival-63691">https://www.tbsnews.net/panorama/empty-streets-humanity-forms-new-bonds-survival-63691</a>                                                                             | On empty streets, humanity forms new bonds for survival               |
| 01/04/2020       | <a href="https://www.tbsnews.net/coronavirus-chronicle/covid-19-bangladesh/free-transport-service-doctors-nurses-begins-63682">https://www.tbsnews.net/coronavirus-chronicle/covid-19-bangladesh/free-transport-service-doctors-nurses-begins-63682</a>                 | Free transport service for doctors, nurses begins                     |
| 01/04/2020       | <a href="https://www.tbsnews.net/coronavirus-chronicle/covid-19-bangladesh/no-possibility-sheltering-homeless-chattogram-dc-63673">https://www.tbsnews.net/coronavirus-chronicle/covid-19-bangladesh/no-possibility-sheltering-homeless-chattogram-dc-63673</a>         | No possibility of sheltering the homeless: Chattogram DC              |
| 01/04/2020       | <a href="https://www.tbsnews.net/bangladesh/over-3-lakh-tourism-workers-may-lose-jobs-pata-63982">https://www.tbsnews.net/bangladesh/over-3-lakh-tourism-workers-may-lose-jobs-pata-63982</a>                                                                           | Over 3 lakh tourism workers may lose jobs: Pata                       |
| 02/04/2020       | <a href="https://www.tbsnews.net/coronavirus-chronicle/covid-19-bangladesh/uber-provide-transport-medical-professionals-64423">https://www.tbsnews.net/coronavirus-chronicle/covid-19-bangladesh/uber-provide-transport-medical-professionals-64423</a>                 | Uber to provide transport to medical professionals                    |
| 02/04/2020       | <a href="https://www.tbsnews.net/coronavirus-chronicle/covid-19-bangladesh/robi-use-crowdsourced-data-helping-govt-tackle-coronavirus">https://www.tbsnews.net/coronavirus-chronicle/covid-19-bangladesh/robi-use-crowdsourced-data-helping-govt-tackle-coronavirus</a> | Robi to use crowdsourced data for helping govt tackle coronavirus     |
| 02/04/2020       | <a href="https://www.tbsnews.net/companies/countrys-leading-e-commerce-companies-working-together-64402">https://www.tbsnews.net/companies/countrys-leading-e-commerce-companies-working-together-64402</a>                                                             | Country's leading e-commerce companies working together               |
| 02/04/2020       | <a href="https://www.tbsnews.net/bangladesh/brac-mobilises-tk15cr-fund-responding-virus-fallout-64420">https://www.tbsnews.net/bangladesh/brac-mobilises-tk15cr-fund-responding-virus-fallout-64420</a>                                                                 | Brac mobilises Tk15cr fund responding to virus fallout                |
| 02/04/2020       | <a href="https://www.tbsnews.net/economy/trade/bangladesh-lifts-ban-export-masks-hand-sanitizers-64366">https://www.tbsnews.net/economy/trade/bangladesh-lifts-ban-export-masks-hand-sanitizers-64366</a>                                                               | Export ban on mask, hand sanitiser lifted                             |
| 02/04/2020       | <a href="https://www.tbsnews.net/markets/oms-rice-be-sold-tk10-kg-64357">https://www.tbsnews.net/markets/oms-rice-be-sold-tk10-kg-64357</a>                                                                                                                             | OMS rice to be sold at Tk10 per kg                                    |
| 02/04/2020       | <a href="https://www.tbsnews.net/bangladesh/health/fbcci-distributing-ppe-masks-hospitals-essential-service-workers-64339">https://www.tbsnews.net/bangladesh/health/fbcci-distributing-ppe-masks-hospitals-essential-service-workers-64339</a>                         | FBCCI distributing PPE, masks to hospitals, essential service workers |



| <b>Date of the news</b> | <b>News URL</b>                                                                                                                                                                                                                                                         | <b>Title of the news</b>                                                                |
|-------------------------|-------------------------------------------------------------------------------------------------------------------------------------------------------------------------------------------------------------------------------------------------------------------------|-----------------------------------------------------------------------------------------|
| 02/04/2020              | <a href="https://www.tbsnews.net/sports/91-first-class-cricketers-donate-their-salaries-battle-coronavirus-64282">https://www.tbsnews.net/sports/91-first-class-cricketers-donate-their-salaries-battle-coronavirus-64282</a>                                           | 91 first-class cricketers donate their salaries to battle Coronavirus                   |
| 02/04/2020              | <a href="https://www.tbsnews.net/coronavirus-chronicle/covid-19-bangladesh/banglalink-launches-digital-healthcare-platform-daktarbhai">https://www.tbsnews.net/coronavirus-chronicle/covid-19-bangladesh/banglalink-launches-digital-healthcare-platform-daktarbhai</a> | 'Daktarbhai' offers free health services to Banglalink subscribers                      |
| 02/04/2020              | <a href="https://www.tbsnews.net/bangladesh/adb-provides-134-million-avoid-skills-trainees-drop-out-due-covid-19-lockdown-64261">https://www.tbsnews.net/bangladesh/adb-provides-134-million-avoid-skills-trainees-drop-out-due-covid-19-lockdown-64261</a>             | ADB provides \$1.34 million to avoid skills trainees' drop out due to Covid-19 lockdown |
| 02/04/2020              | <a href="https://www.tbsnews.net/coronavirus-chronicle/covid-19-bangladesh/substandard-ppe-floods-dhakas-markets-64042">https://www.tbsnews.net/coronavirus-chronicle/covid-19-bangladesh/substandard-ppe-floods-dhakas-markets-64042</a>                               | Substandard PPE floods Dhaka's markets                                                  |
| 02/04/2020              | <a href="https://www.tbsnews.net/coronavirus-chronicle/covid-19-bangladesh/govt-giving-aid-beneficiary-list-not-finalised-yet-64186">https://www.tbsnews.net/coronavirus-chronicle/covid-19-bangladesh/govt-giving-aid-beneficiary-list-not-finalised-yet-64186</a>     | Govt giving aid, but beneficiary list not finalised yet                                 |
| 02/04/2020              | <a href="https://www.tbsnews.net/coronavirus-chronicle/covid-19-bangladesh/six-labs-work-testing-so-little-64081">https://www.tbsnews.net/coronavirus-chronicle/covid-19-bangladesh/six-labs-work-testing-so-little-64081</a>                                           | Six labs at work but testing so little!                                                 |
| 02/04/2020              | <a href="https://www.tbsnews.net/coronavirus-chronicle/covid-19-bangladesh/bangladesh-coast-guard-distributes-masks-and-soap-among">https://www.tbsnews.net/coronavirus-chronicle/covid-19-bangladesh/bangladesh-coast-guard-distributes-masks-and-soap-among</a>       | Bangladesh Coast Guard distributes masks and soap among poor people                     |
| 02/04/2020              | <a href="https://www.tbsnews.net/coronavirus-chronicle/covid-19-bangladesh/protest-front-police-station-chattogram-relief-64411">https://www.tbsnews.net/coronavirus-chronicle/covid-19-bangladesh/protest-front-police-station-chattogram-relief-64411</a>             | Protest in front of police station in Chattogram for relief                             |
| 03/04/2020              | <a href="https://www.tbsnews.net/coronavirus-chronicle/covid-19-bangladesh/consult-doctors-says-pm-issuing-31-directives-64459">https://www.tbsnews.net/coronavirus-chronicle/covid-19-bangladesh/consult-doctors-says-pm-issuing-31-directives-64459</a>               | Consult doctors, says PM issuing 31 directives                                          |
| 03/04/2020              | <a href="https://www.tbsnews.net/sports/shakibs-foundation-provide-coronavirus-testing-kits-hospitals-64714">https://www.tbsnews.net/sports/shakibs-foundation-provide-coronavirus-testing-kits-hospitals-64714</a>                                                     | Shakib's foundation to provide coronavirus testing kits for hospitals                   |
| 03/04/2020              | <a href="https://www.tbsnews.net/coronavirus-chronicle/covid-19-bangladesh/ityadi-stands-poor-fight-coronavirus-64648">https://www.tbsnews.net/coronavirus-chronicle/covid-19-bangladesh/ityadi-stands-poor-fight-coronavirus-64648</a>                                 | Ityadi stands by poor to fight coronavirus                                              |
| 03/04/2020              | <a href="https://www.tbsnews.net/coronavirus-chronicle/covid-19-bangladesh/how-private-citizens-are-making-who-grade-ppe-64453">https://www.tbsnews.net/coronavirus-chronicle/covid-19-bangladesh/how-private-citizens-are-making-who-grade-ppe-64453</a>               | How private citizens are making WHO-grade PPE                                           |
| 03/04/2020              | <a href="https://www.tbsnews.net/bangladesh/stealing-poops-rice-64789">https://www.tbsnews.net/bangladesh/stealing-poops-rice-64789</a>                                                                                                                                 | Stealing the poor's rice                                                                |
| 03/04/2020              | <a href="https://www.tbsnews.net/economy/trade/dcci-seeks-emergency-fund-smes-informal-sector-64783">https://www.tbsnews.net/economy/trade/dcci-seeks-emergency-fund-smes-informal-sector-64783</a>                                                                     | DCCI seeks emergency fund for SMEs, informal sector                                     |
| 03/04/2020              | <a href="https://www.tbsnews.net/coronavirus-chronicle/covid-19-bangladesh/police-introduce-free-food-home-ctg-64744">https://www.tbsnews.net/coronavirus-chronicle/covid-19-bangladesh/police-introduce-free-food-home-ctg-64744</a>                                   | Police introduce 'free food at home' in Ctg                                             |
| 03/04/2020              | <a href="https://www.tbsnews.net/glitz/iflix-content-made-free-amid-coronavirus-64690">https://www.tbsnews.net/glitz/iflix-content-made-free-amid-coronavirus-64690</a>                                                                                                 | iflix content made free amid coronavirus                                                |
| 03/04/2020              | <a href="https://www.tbsnews.net/coronavirus-chronicle/covid-19-bangladesh/no-aid-14-lakh-ctg-slum-dwellers-due-incoordination-64576">https://www.tbsnews.net/coronavirus-chronicle/covid-19-bangladesh/no-aid-14-lakh-ctg-slum-dwellers-due-incoordination-64576</a>   | No aid for 14 lakh Ctg slum dwellers due to incoordination                              |
| 03/04/2020              | <a href="https://www.tbsnews.net/bangladesh/health/diagnostic-centres-dhaka-wear-vacant-look-64537">https://www.tbsnews.net/bangladesh/health/diagnostic-centres-dhaka-wear-vacant-look-64537</a>                                                                       | Diagnostic centres in Dhaka wear a deserted look                                        |
| 04/04/2020              | <a href="https://www.tbsnews.net/coronavirus-chronicle/covid-19-bangladesh/dhaka-south-hotlines-see-big-increase-calls-65191">https://www.tbsnews.net/coronavirus-chronicle/covid-19-bangladesh/dhaka-south-hotlines-see-big-increase-calls-65191</a>                   | Dhaka South hotlines see big increase in calls                                          |
| 04/04/2020              | <a href="https://www.tbsnews.net/economy/shipbuilders-demand-incentive-package-fight-covid-19-impacts-65173">https://www.tbsnews.net/economy/shipbuilders-demand-incentive-package-fight-covid-19-impacts-65173</a>                                                     | Shipbuilders demand incentive package to fight Covid-19 impacts                         |
| 04/04/2020              | <a href="https://www.tbsnews.net/coronavirus-chronicle/covid-19-bangladesh/private-university-students-taking-online-classes-64867">https://www.tbsnews.net/coronavirus-chronicle/covid-19-bangladesh/private-university-students-taking-online-classes-64867</a>       | Private university students taking online classes                                       |

| Date of the news | News URL                                                                                                                                                                                                                                                                | Title of the news                                                               |
|------------------|-------------------------------------------------------------------------------------------------------------------------------------------------------------------------------------------------------------------------------------------------------------------------|---------------------------------------------------------------------------------|
| 04/04/2020       | <a href="https://www.tbsnews.net/coronavirus-chronicle/covid-19-bangladesh/jhorapata-foundation-stands-beside-helpless-65167">https://www.tbsnews.net/coronavirus-chronicle/covid-19-bangladesh/jhorapata-foundation-stands-beside-helpless-65167</a>                   | Jhorapata foundation stands beside the helpless                                 |
| 04/04/2020       | <a href="https://www.tbsnews.net/coronavirus-chronicle/covid-19-bangladesh/asa-provide-food-15-lakh-poor-65152">https://www.tbsnews.net/coronavirus-chronicle/covid-19-bangladesh/asa-provide-food-15-lakh-poor-65152</a>                                               | ASA to provide food to 1.5 lakh poor                                            |
| 04/04/2020       | <a href="https://www.tbsnews.net/bangladesh/health/bangladesh-makes-favipiravir-treat-covid-19-patients-65143">https://www.tbsnews.net/bangladesh/health/bangladesh-makes-favipiravir-treat-covid-19-patients-65143</a>                                                 | Beximco, Beacon pharma make Japanese Covid-19 drug                              |
| 04/04/2020       | <a href="https://www.tbsnews.net/coronavirus-chronicle/covid-19-bangladesh/idlc-launches-month-long-food-distribution-programme">https://www.tbsnews.net/coronavirus-chronicle/covid-19-bangladesh/idlc-launches-month-long-food-distribution-programme</a>             | IDLC launches month-long food distribution programme for corona-hit people      |
| 04/04/2020       | <a href="https://www.tbsnews.net/coronavirus-chronicle/covid-19-bangladesh/bashundhara-group-gives-police-25-thousand-masks-65098">https://www.tbsnews.net/coronavirus-chronicle/covid-19-bangladesh/bashundhara-group-gives-police-25-thousand-masks-65098</a>         | Bashundhara Group gives police 25 thousand masks                                |
| 04/04/2020       | <a href="https://www.tbsnews.net/coronavirus-chronicle/covid-19-bangladesh/mashrafes-foundation-provide-medical-service-amid">https://www.tbsnews.net/coronavirus-chronicle/covid-19-bangladesh/mashrafes-foundation-provide-medical-service-amid</a>                   | Mashrafe's foundation to provide medical service amid coronavirus               |
| 04/04/2020       | <a href="https://www.tbsnews.net/coronavirus-chronicle/covid-19-bangladesh/shakibs-foundation-confidence-group-donate-tk20lakh-combat">https://www.tbsnews.net/coronavirus-chronicle/covid-19-bangladesh/shakibs-foundation-confidence-group-donate-tk20lakh-combat</a> | Shakib's foundation with Confidence Group to donate Tk20lakh to combat Covid-19 |
| 04/04/2020       | <a href="https://www.tbsnews.net/bangladesh/health/voluntary-medical-responses-time-social-distancing-64969">https://www.tbsnews.net/bangladesh/health/voluntary-medical-responses-time-social-distancing-64969</a>                                                     | Voluntary medical responses in the time of social distancing                    |
| 04/04/2020       | <a href="https://www.tbsnews.net/coronavirus-chronicle/covid-19-bangladesh/bangladesh-scouts-conduct-online-awareness-campaign-covid">https://www.tbsnews.net/coronavirus-chronicle/covid-19-bangladesh/bangladesh-scouts-conduct-online-awareness-campaign-covid</a>   | Bangladesh Scouts conduct online awareness campaign on Covid-19                 |
| 04/04/2020       | <a href="https://www.tbsnews.net/coronavirus-chronicle/covid-19-bangladesh/world-bank-fast-tracks-100m-coronavirus-support-bangladesh">https://www.tbsnews.net/coronavirus-chronicle/covid-19-bangladesh/world-bank-fast-tracks-100m-coronavirus-support-bangladesh</a> | Bangladesh to get \$100m from World Bank to fight Coronavirus                   |
| 04/04/2020       | <a href="https://www.tbsnews.net/bangladesh/people-rushing-towards-dhaka-foot-65014">https://www.tbsnews.net/bangladesh/people-rushing-towards-dhaka-foot-65014</a>                                                                                                     | A perilous return of Bangladeshi garment workers amid shutdown                  |
| 04/04/2020       | <a href="https://www.tbsnews.net/coronavirus-chronicle/covid-19-bangladesh/1-lakh-chattogram-transport-workers-face-bleak-future">https://www.tbsnews.net/coronavirus-chronicle/covid-19-bangladesh/1-lakh-chattogram-transport-workers-face-bleak-future</a>           | 1 lakh Chattogram transport workers face bleak future                           |
| 04/04/2020       | <a href="https://www.tbsnews.net/coronavirus-chronicle/covid-19-bangladesh/consider-closing-rmg-factories-tackle-coronavirus-dscc">https://www.tbsnews.net/coronavirus-chronicle/covid-19-bangladesh/consider-closing-rmg-factories-tackle-coronavirus-dscc</a>         | Consider closing RMG factories to tackle coronavirus: DSCC Mayor                |
| 04/04/2020       | <a href="https://www.tbsnews.net/coronavirus-chronicle/covid-19-bangladesh/dncrp-commerce-ministry-teams-monitor-markets-hospitals">https://www.tbsnews.net/coronavirus-chronicle/covid-19-bangladesh/dncrp-commerce-ministry-teams-monitor-markets-hospitals</a>       | DNCRP, Commerce Ministry teams monitor markets, hospitals                       |
| 04/04/2020       | <a href="https://www.tbsnews.net/coronavirus-chronicle/covid-19-bangladesh/maleque-concerted-efforts-contain-spread-covid-19-65134">https://www.tbsnews.net/coronavirus-chronicle/covid-19-bangladesh/maleque-concerted-efforts-contain-spread-covid-19-65134</a>       | Maleque for concerted efforts to contain spread of COVID-19                     |
| 04/04/2020       | <a href="https://www.tbsnews.net/bangladesh/crime/chattogram-chairman-embezzled-govt-relief-65161">https://www.tbsnews.net/bangladesh/crime/chattogram-chairman-embezzled-govt-relief-65161</a>                                                                         | Chattogram UP chairman embezzled govt relief?                                   |
| 04/04/2020       | <a href="https://www.tbsnews.net/bangladesh/crime/555-sacks-govt-rice-seized-jashore-2-held-65164">https://www.tbsnews.net/bangladesh/crime/555-sacks-govt-rice-seized-jashore-2-held-65164</a>                                                                         | 555 sacks of govt rice seized in Jashore, 2 held                                |
| 05/04/2020       | <a href="https://www.tbsnews.net/coronavirus-chronicle/covid-19-bangladesh/ksrm-donates-ppe-healthcare-professionals-chattogram-65614">https://www.tbsnews.net/coronavirus-chronicle/covid-19-bangladesh/ksrm-donates-ppe-healthcare-professionals-chattogram-65614</a> | KSRM donates PPE to healthcare professionals in Chattogram                      |
| 05/04/2020       | <a href="https://www.tbsnews.net/economy/banking/al-arafah-islami-bank-donates-tk5-crore-prime-ministers-relief-fund-65578">https://www.tbsnews.net/economy/banking/al-arafah-islami-bank-donates-tk5-crore-prime-ministers-relief-fund-65578</a>                       | Al-Arafah Islami Bank donates Tk5 crore to prime minister's relief fund         |
| 05/04/2020       | <a href="https://www.tbsnews.net/coronavirus-chronicle/covid-19-bangladesh/pran-rfl-lends-hand-coronavirus-hit-people-65563">https://www.tbsnews.net/coronavirus-chronicle/covid-19-bangladesh/pran-rfl-lends-hand-coronavirus-hit-people-65563</a>                     | Pran-Rfl lends hand to coronavirus-hit people                                   |

| <b>Date of the news</b> | <b>News URL</b>                                                                                                                                                                                                                                                         | <b>Title of the news</b>                                                |
|-------------------------|-------------------------------------------------------------------------------------------------------------------------------------------------------------------------------------------------------------------------------------------------------------------------|-------------------------------------------------------------------------|
| 05/04/2020              | <a href="https://www.tbsnews.net/coronavirus-chronicle/covid-19-bangladesh/bangladesh-investment-bankers-community-support-65551">https://www.tbsnews.net/coronavirus-chronicle/covid-19-bangladesh/bangladesh-investment-bankers-community-support-65551</a>           | Bangladesh investment bankers in community support                      |
| 05/04/2020              | <a href="https://www.tbsnews.net/coronavirus-chronicle/covid-19-bangladesh/jci-dhaka-east-distributes-essentials-350-families-65446">https://www.tbsnews.net/coronavirus-chronicle/covid-19-bangladesh/jci-dhaka-east-distributes-essentials-350-families-65446</a>     | JCI Dhaka East distributes essentials to 350 families                   |
| 05/04/2020              | <a href="https://www.tbsnews.net/coronavirus-chronicle/covid-19-bangladesh/consumer-rights-protection-directorate-monitor-hospitals">https://www.tbsnews.net/coronavirus-chronicle/covid-19-bangladesh/consumer-rights-protection-directorate-monitor-hospitals</a>     | Consumer rights protection directorate to monitor hospitals             |
| 05/04/2020              | <a href="https://www.tbsnews.net/economy/rmg/garment-workers-big-trouble-65635">https://www.tbsnews.net/economy/rmg/garment-workers-big-trouble-65635</a>                                                                                                               | Garment workers in a big trouble                                        |
| 05/04/2020              | <a href="https://www.tbsnews.net/companies/egeneration-provide-free-enablement-and-training-remote-work-tool-65371">https://www.tbsnews.net/companies/egeneration-provide-free-enablement-and-training-remote-work-tool-65371</a>                                       | eGeneration to provide free enablement and training of remote work tool |
| 05/04/2020              | <a href="https://www.tbsnews.net/coronavirus-chronicle/covid-19-bangladesh/abandoned-gloves-can-spread-covid-19-65416">https://www.tbsnews.net/coronavirus-chronicle/covid-19-bangladesh/abandoned-gloves-can-spread-covid-19-65416</a>                                 | Abandoned gloves can spread Covid-19                                    |
| 06/04/2020              | <a href="https://www.tbsnews.net/coronavirus-chronicle/covid-19-bangladesh/sonali-rupali-and-janata-donate-tk375cr-pms-relief-fund">https://www.tbsnews.net/coronavirus-chronicle/covid-19-bangladesh/sonali-rupali-and-janata-donate-tk375cr-pms-relief-fund</a>       | Sonali, Rupali and Janata donate Tk3.75cr to PM's relief fund           |
| 06/04/2020              | <a href="https://www.tbsnews.net/coronavirus-chronicle/covid-19-bangladesh/agrani-bank-donates-tk125cr-pms-relief-fund-66079">https://www.tbsnews.net/coronavirus-chronicle/covid-19-bangladesh/agrani-bank-donates-tk125cr-pms-relief-fund-66079</a>                   | Agrani Bank donates Tk1.25cr to PM's relief fund                        |
| 06/04/2020              | <a href="https://www.tbsnews.net/coronavirus-chronicle/covid-19-bangladesh/nrbc-bank-forms-health-desk-fight-coronavirus-66067">https://www.tbsnews.net/coronavirus-chronicle/covid-19-bangladesh/nrbc-bank-forms-health-desk-fight-coronavirus-66067</a>               | NRBC Bank forms health desk to fight coronavirus                        |
| 06/04/2020              | <a href="https://www.tbsnews.net/coronavirus-chronicle/covid-19-bangladesh/marico-donates-tk50-lakh-pms-relief-and-welfare-fund-66064">https://www.tbsnews.net/coronavirus-chronicle/covid-19-bangladesh/marico-donates-tk50-lakh-pms-relief-and-welfare-fund-66064</a> | Marico donates Tk50 lakh to PM's Relief and Welfare Fund                |
| 06/04/2020              | <a href="https://www.tbsnews.net/coronavirus-chronicle/covid-19-bangladesh/merchant-bankers-lend-hand-poor-66010">https://www.tbsnews.net/coronavirus-chronicle/covid-19-bangladesh/merchant-bankers-lend-hand-poor-66010</a>                                           | Merchant bankers lend a hand to the poor                                |
| 06/04/2020              | <a href="https://www.tbsnews.net/coronavirus-chronicle/covid-19-bangladesh/salma-adil-foundation-distributes-ppe-chandanaish-65935">https://www.tbsnews.net/coronavirus-chronicle/covid-19-bangladesh/salma-adil-foundation-distributes-ppe-chandanaish-65935</a>       | Salma-Adil Foundation distributes PPE in Chandanaish                    |
| 06/04/2020              | <a href="https://www.tbsnews.net/bangladesh/police-donate-tk-20-crore-pms-relief-fund-65806">https://www.tbsnews.net/bangladesh/police-donate-tk-20-crore-pms-relief-fund-65806</a>                                                                                     | Police donate Tk 20 crore to PM's relief fund                           |
|                         | <a href="https://www.tbsnews.net/coronavirus-chronicle/covid-19-bangladesh/coast-guard-donates-one-day-salary-pms-relief-fund-65932">https://www.tbsnews.net/coronavirus-chronicle/covid-19-bangladesh/coast-guard-donates-one-day-salary-pms-relief-fund-65932</a>     | Coast Guard donates one-day salary to PM's relief fund                  |
| 06/04/2020              | <a href="https://www.tbsnews.net/coronavirus-chronicle/covid-19-bangladesh/jamuna-group-donates-tk10-crore-pms-relief-fund-65812">https://www.tbsnews.net/coronavirus-chronicle/covid-19-bangladesh/jamuna-group-donates-tk10-crore-pms-relief-fund-65812</a>           | Jamuna Group donates Tk10 crore to PM's relief fund                     |
| 06/04/2020              | <a href="https://www.tbsnews.net/coronavirus-chronicle/covid-19-bangladesh/fbcci-donates-tk2cr-pms-relief-fund-fight-coronavirus">https://www.tbsnews.net/coronavirus-chronicle/covid-19-bangladesh/fbcci-donates-tk2cr-pms-relief-fund-fight-coronavirus</a>           | FBCCI donates Tk2cr to PM's relief fund to fight coronavirus            |
| 06/04/2020              | <a href="https://www.tbsnews.net/coronavirus-chronicle/covid-19-bangladesh/red-crescent-launches-psychosocial-support-cell-covid-19">https://www.tbsnews.net/coronavirus-chronicle/covid-19-bangladesh/red-crescent-launches-psychosocial-support-cell-covid-19</a>     | Red Crescent launches 'psychosocial support cell' on COVID-19           |
|                         | <a href="https://www.tbsnews.net/bangladesh/pabna-lged-executive-engineer-accused-extorting-money-66028">https://www.tbsnews.net/bangladesh/pabna-lged-executive-engineer-accused-extorting-money-66028</a>                                                             | Pabna LGED executive engineer accused of extorting money                |
|                         | <a href="https://www.tbsnews.net/bangladesh/telecom/airtel-offers-lucrative-stay-home-packages-users-66061">https://www.tbsnews.net/bangladesh/telecom/airtel-offers-lucrative-stay-home-packages-users-66061</a>                                                       | Airtel offers lucrative stay-home packages for users                    |
|                         | <a href="https://www.tbsnews.net/economy/rmg/bgmea-bkmea-decide-shut-all-factories-till-april-14-66031">https://www.tbsnews.net/economy/rmg/bgmea-bkmea-decide-shut-all-factories-till-april-14-66031</a>                                                               | BGMEA, BKMEA decide to shut all factories till April 14                 |

| <b>Date of the news</b> | <b>News URL</b>                                                                                                                                                                                                                                                         | <b>Title of the news</b>                                                    |
|-------------------------|-------------------------------------------------------------------------------------------------------------------------------------------------------------------------------------------------------------------------------------------------------------------------|-----------------------------------------------------------------------------|
|                         | <a href="https://www.tbsnews.net/coronavirus-chronicle/covid-19-bangladesh/sigminds-ai-recognises-faces-wearing-masks-65938">https://www.tbsnews.net/coronavirus-chronicle/covid-19-bangladesh/sigminds-ai-recognises-faces-wearing-masks-65938</a>                     | Sigmind's AI recognises faces wearing masks                                 |
| 07/04/2020              | <a href="https://www.tbsnews.net/coronavirus-chronicle/covid-19-bangladesh/united-group-contributes-tk5-crore-fight-pandemic-covid-19">https://www.tbsnews.net/coronavirus-chronicle/covid-19-bangladesh/united-group-contributes-tk5-crore-fight-pandemic-covid-19</a> | United group contributes Tk5 crore to fight pandemic Covid-19               |
| 08/04/2020              | <a href="https://www.tbsnews.net/sports/u-19-champions-fund-battle-coronavirus-66910">https://www.tbsnews.net/sports/u-19-champions-fund-battle-coronavirus-66910</a>                                                                                                   | U-19 champions for fund to battle coronavirus                               |
| 08/04/2020              | <a href="https://www.tbsnews.net/companies/empowering-youth-fight-covid-19-enriching-digital-maps-66883">https://www.tbsnews.net/companies/empowering-youth-fight-covid-19-enriching-digital-maps-66883</a>                                                             | Empowering the youth to fight COVID-19 by enriching digital maps            |
| 08/04/2020              | <a href="https://www.tbsnews.net/tech/gpa2i-moves-update-google-map-help-emergency-services-66811">https://www.tbsnews.net/tech/gpa2i-moves-update-google-map-help-emergency-services-66811</a>                                                                         | GP, a2i updating digital maps to support emergency services                 |
| 09/04/2020              | <a href="https://www.tbsnews.net/coronavirus-chronicle/covid-19-bangladesh/bangladeshi-it-firm-develops-low-cost-ventilator-67141">https://www.tbsnews.net/coronavirus-chronicle/covid-19-bangladesh/bangladeshi-it-firm-develops-low-cost-ventilator-67141</a>         | Bangladeshi IT firm develops low-cost ventilator                            |
| 09/04/2020              | <a href="https://www.tbsnews.net/coronavirus-chronicle/covid-19-bangladesh/shutdown-couldnt-stop-shahajpath-high-school-67111">https://www.tbsnews.net/coronavirus-chronicle/covid-19-bangladesh/shutdown-couldnt-stop-shahajpath-high-school-67111</a>                 | Shutdown couldn't stop Shahajpath High School                               |
| 10/04/2020              | <a href="https://www.tbsnews.net/coronavirus-chronicle/covid-19-bangladesh/hellodoc24-renders-free-coronavirus-counseling-67618">https://www.tbsnews.net/coronavirus-chronicle/covid-19-bangladesh/hellodoc24-renders-free-coronavirus-counseling-67618</a>             | HelloDoc24 renders free coronavirus counseling                              |
| 10/04/2020              | <a href="https://www.tbsnews.net/coronavirus-chronicle/covid-19-bangladesh/extreme-poverty-rises-60-percent-amid-covid-19-brac-survey">https://www.tbsnews.net/coronavirus-chronicle/covid-19-bangladesh/extreme-poverty-rises-60-percent-amid-covid-19-brac-survey</a> | Extreme poverty rises 60% amid Covid-19 outbreak: Brac survey               |
| 10/04/2020              | <a href="https://www.tbsnews.net/bangladesh/34-healthcare-staffers-lose-jobs-chattogram-67423">https://www.tbsnews.net/bangladesh/34-healthcare-staffers-lose-jobs-chattogram-67423</a>                                                                                 | 34 healthcare staffers lose jobs in Chattogram                              |
| 11/04/2020              | <a href="https://www.tbsnews.net/coronavirus-chronicle/covid-19-bangladesh/covid-19-ypsa-distributes-relief-1070-ship-breaking-0">https://www.tbsnews.net/coronavirus-chronicle/covid-19-bangladesh/covid-19-ypsa-distributes-relief-1070-ship-breaking-0</a>           | Covid-19: Ypsa distributes relief to 1070 ship-breaking labourers           |
| 11/04/2020              | <a href="https://www.tbsnews.net/coronavirus-chronicle/covid-19-bangladesh/actionaid-bangladeshs-response-covid-19-67912">https://www.tbsnews.net/coronavirus-chronicle/covid-19-bangladesh/actionaid-bangladeshs-response-covid-19-67912</a>                           | ActionAid Bangladesh's response to Covid-19                                 |
| 11/04/2020              | <a href="https://www.tbsnews.net/coronavirus-chronicle/covid-19-bangladesh/php-family-distributes-relief-10000-families-donates-tk2">https://www.tbsnews.net/coronavirus-chronicle/covid-19-bangladesh/php-family-distributes-relief-10000-families-donates-tk2</a>     | PHP Family distributes relief to 10,000 families, donates Tk2 cr to PM fund |
| 11/04/2020              | <a href="https://www.tbsnews.net/coronavirus-chronicle/covid-19-bangladesh/gsk-partners-care-bangladesh-support-covid-19-affected">https://www.tbsnews.net/coronavirus-chronicle/covid-19-bangladesh/gsk-partners-care-bangladesh-support-covid-19-affected</a>         | GSK partners with Care Bangladesh to support Covid-19 affected people       |
| 11/04/2020              | <a href="https://www.tbsnews.net/coronavirus-chronicle/covid-19-bangladesh/celebrate-bangla-new-year-shubho-noboborsho-bot-67837">https://www.tbsnews.net/coronavirus-chronicle/covid-19-bangladesh/celebrate-bangla-new-year-shubho-noboborsho-bot-67837</a>           | Celebrate Bangla New Year with 'Shubho Noboborsho Bot'                      |
| 11/04/2020              | <a href="https://www.tbsnews.net/coronavirus-chronicle/covid-19-bangladesh/unilever-bangladesh-pledges-tk200-m-tackle-covid-19-67825">https://www.tbsnews.net/coronavirus-chronicle/covid-19-bangladesh/unilever-bangladesh-pledges-tk200-m-tackle-covid-19-67825</a>   | Unilever Bangladesh pledges Tk200 m to tackle Covid-19                      |
| 11/04/2020              | <a href="https://www.tbsnews.net/coronavirus-chronicle/covid-19-bangladesh/muslim-ambassadors-provided-6-tonnes-food-aid-poor-67813">https://www.tbsnews.net/coronavirus-chronicle/covid-19-bangladesh/muslim-ambassadors-provided-6-tonnes-food-aid-poor-67813</a>     | Muslim ambassadors provided 6 tonnes of food aid to the poor                |
| 11/04/2020              | <a href="https://www.tbsnews.net/coronavirus-chronicle/covid-19-bangladesh/switzerland-backs-bangladeshs-covid-19-response-67717">https://www.tbsnews.net/coronavirus-chronicle/covid-19-bangladesh/switzerland-backs-bangladeshs-covid-19-response-67717</a>           | Switzerland backs Bangladesh's COVID-19 response                            |
| 12/04/2020              | <a href="https://www.tbsnews.net/coronavirus-chronicle/covid-19-bangladesh/bgmea-provides-relief-covid-19-affected-people-68368">https://www.tbsnews.net/coronavirus-chronicle/covid-19-bangladesh/bgmea-provides-relief-covid-19-affected-people-68368</a>             | BGMEA provides relief for Covid-19 affected people                          |
| 12/04/2020              | <a href="https://www.tbsnews.net/coronavirus-chronicle/covid-19-bangladesh/mashrafe-lauds-nagads-initiatives-fighting-covid-19-68356">https://www.tbsnews.net/coronavirus-chronicle/covid-19-bangladesh/mashrafe-lauds-nagads-initiatives-fighting-covid-19-68356</a>   | Mashrafe lauds Nagad's initiatives for fighting Covid-19                    |



| <b>Date of the news</b> | <b>News URL</b>                                                                                                                                                                                                                                                     | <b>Title of the news</b>                                                               |
|-------------------------|---------------------------------------------------------------------------------------------------------------------------------------------------------------------------------------------------------------------------------------------------------------------|----------------------------------------------------------------------------------------|
| 12/04/2020              | <a href="https://www.tbsnews.net/coronavirus-chronicle/covid-19-bangladesh/bangladesh-scouts-distribute-soap-bars-fight-covid-19">https://www.tbsnews.net/coronavirus-chronicle/covid-19-bangladesh/bangladesh-scouts-distribute-soap-bars-fight-covid-19</a>       | <b>Bangladesh Scouts to distribute soap bars to fight Covid-19</b>                     |
| 13/04/2020              | <a href="https://www.tbsnews.net/tech/huawei-assists-bd-china-medical-experts-sharing-knowledge-over-covid-19-68767">https://www.tbsnews.net/tech/huawei-assists-bd-china-medical-experts-sharing-knowledge-over-covid-19-68767</a>                                 | <b>Huawei assists BD-China medical experts sharing knowledge over Covid-19</b>         |
| 13/04/2020              | <a href="https://www.tbsnews.net/coronavirus-chronicle/covid-19-bangladesh/ceab-launches-help-them-stay-home-support-bangladeshis">https://www.tbsnews.net/coronavirus-chronicle/covid-19-bangladesh/ceab-launches-help-them-stay-home-support-bangladeshis</a>     | <b>CEAB launches 'Help them stay home' to support Bangladeshis</b>                     |
| 13/04/2020              | <a href="https://www.tbsnews.net/economy/banking/bankers-get-months-salary-working-10-day-during-shutdown-68572">https://www.tbsnews.net/economy/banking/bankers-get-months-salary-working-10-day-during-shutdown-68572</a>                                         | <b>Bank employees working during shutdown to get double basic salary</b>               |
| 14/04/2020              | <a href="https://www.tbsnews.net/coronavirus-chronicle/covid-19-bangladesh/govt-incorporates-ngo-testing-covid-19-69172">https://www.tbsnews.net/coronavirus-chronicle/covid-19-bangladesh/govt-incorporates-ngo-testing-covid-19-69172</a>                         | <b>Govt incorporates NGO in testing COVID-19</b>                                       |
| 14/04/2020              | <a href="https://www.tbsnews.net/glitz/celebrate-pohela-boishakh-live-music-and-events-online-69037">https://www.tbsnews.net/glitz/celebrate-pohela-boishakh-live-music-and-events-online-69037</a>                                                                 | <b>Celebrate Pohela Boishakh with live music and events online</b>                     |
| 14/04/2020              | <a href="https://www.tbsnews.net/glitz/bangladeshi-influencers-fighting-coronavirus-instagram-68959">https://www.tbsnews.net/glitz/bangladeshi-influencers-fighting-coronavirus-instagram-68959</a>                                                                 | <b>Bangladeshi influencers fighting coronavirus on Instagram</b>                       |
| 14/04/2020              | <a href="https://www.tbsnews.net/bangladesh/health/mobile-team-treats-general-patients-sylhet-68929">https://www.tbsnews.net/bangladesh/health/mobile-team-treats-general-patients-sylhet-68929</a>                                                                 | <b>Mobile team treats general patients in Sylhet</b>                                   |
| 15/04/2020              | <a href="https://www.tbsnews.net/bangladesh/bcs-taxation-association-donates-one-day-salary-pms-relief-and-welfare-fund-69742">https://www.tbsnews.net/bangladesh/bcs-taxation-association-donates-one-day-salary-pms-relief-and-welfare-fund-69742</a>             | <b>BCS Taxation Association donates one day salary to PM's Relief and Welfare Fund</b> |
| 15/04/2020              | <a href="https://www.tbsnews.net/companies/pran-rfl-provides-food-40000-families-69727">https://www.tbsnews.net/companies/pran-rfl-provides-food-40000-families-69727</a>                                                                                           | <b>Pran-Rfl provides food for 40,000 families</b>                                      |
| 15/04/2020              | <a href="https://www.tbsnews.net/bangladesh/education/icone-organises-online-educational-events-during-covid-19-crisis-69721">https://www.tbsnews.net/bangladesh/education/icone-organises-online-educational-events-during-covid-19-crisis-69721</a>               | <b>Icone organises online educational events during Covid-19 crisis</b>                |
| 15/04/2020              | <a href="https://www.tbsnews.net/companies/lafargeholcim-distributes-food-among-workers-69709">https://www.tbsnews.net/companies/lafargeholcim-distributes-food-among-workers-69709</a>                                                                             | <b>LafargeHolcim distributes food among workers</b>                                    |
| 15/04/2020              | <a href="https://www.tbsnews.net/coronavirus-chronicle/covid-19-bangladesh/city-bank-distributes-food-among-1-lakh-poor-69694">https://www.tbsnews.net/coronavirus-chronicle/covid-19-bangladesh/city-bank-distributes-food-among-1-lakh-poor-69694</a>             | <b>City Bank distributes food among 1 lakh poor</b>                                    |
| 15/04/2020              | <a href="https://www.tbsnews.net/coronavirus-chronicle/covid-19-bangladesh/grameen-shikkha-distributes-emergency-foods-mirpur-slums">https://www.tbsnews.net/coronavirus-chronicle/covid-19-bangladesh/grameen-shikkha-distributes-emergency-foods-mirpur-slums</a> | <b>Grameen Shikkha distributes emergency foods in Mirpur slums</b>                     |
| 15/04/2020              | <a href="https://www.tbsnews.net/economy/rmq/bkash-steps-help-apparel-workers-get-salary-69523">https://www.tbsnews.net/economy/rmq/bkash-steps-help-apparel-workers-get-salary-69523</a>                                                                           | <b>bKash steps up to help apparel workers get salary</b>                               |
| 15/04/2020              | <a href="https://www.tbsnews.net/thoughts/private-sector-reacting-enough-69463">https://www.tbsnews.net/thoughts/private-sector-reacting-enough-69463</a>                                                                                                           | <b>Private sector is reacting but is that enough?</b>                                  |
| 16/04/2020              | <a href="https://www.tbsnews.net/companies/brac-driving-school-raising-covid-19-awareness-70186">https://www.tbsnews.net/companies/brac-driving-school-raising-covid-19-awareness-70186</a>                                                                         | <b>BRAC Driving School raising COVID-19 awareness</b>                                  |
| 16/04/2020              | <a href="https://www.tbsnews.net/companies/lafargeholcim-declares-layoff-dhaka-office-70171">https://www.tbsnews.net/companies/lafargeholcim-declares-layoff-dhaka-office-70171</a>                                                                                 | <b>LafargeHolcim declares layoff at Dhaka office</b>                                   |
| 16/04/2020              | <a href="https://www.tbsnews.net/companies/grameen-telecom-working-ensure-safety-doctors-and-healthcare-workers-70108">https://www.tbsnews.net/companies/grameen-telecom-working-ensure-safety-doctors-and-healthcare-workers-70108</a>                             | <b>Grameen Telecom working to ensure safety of doctors and healthcare workers</b>      |
| 16/04/2020              | <a href="https://www.tbsnews.net/coronavirus-chronicle/covid-19-bangladesh/brac-gives-430-rooms-set-quarantine-centre-70006">https://www.tbsnews.net/coronavirus-chronicle/covid-19-bangladesh/brac-gives-430-rooms-set-quarantine-centre-70006</a>                 | <b>Brac gives 430 rooms to set up quarantine centre</b>                                |
| 16/04/2020              | <a href="https://www.tbsnews.net/glitz/musicians-collaborate-shwapnos-effort-combat-covid-19-69835">https://www.tbsnews.net/glitz/musicians-collaborate-shwapnos-effort-combat-covid-19-69835</a>                                                                   | <b>Musicians collaborate with Shwapno's effort to combat COVID-19</b>                  |

| <b>Date of the news</b> | <b>News URL</b>                                                                                                                                                                                                                                                         | <b>Title of the news</b>                                                                       |
|-------------------------|-------------------------------------------------------------------------------------------------------------------------------------------------------------------------------------------------------------------------------------------------------------------------|------------------------------------------------------------------------------------------------|
| 17/04/2020              | <a href="https://www.tbsnews.net/bangladesh/health/ibrahim-cardiac-ccu-closed-11-mitford-hospital-staff-test-covid-19-positive-70657">https://www.tbsnews.net/bangladesh/health/ibrahim-cardiac-ccu-closed-11-mitford-hospital-staff-test-covid-19-positive-70657</a>   | <b>Ibrahim Cardiac CCU closed; 11 Mitford Hospital staff test Covid-19 positive</b>            |
| 17/04/2020              | <a href="https://www.tbsnews.net/economy/industry/pabna-bscic-busy-producing-essential-products-70645">https://www.tbsnews.net/economy/industry/pabna-bscic-busy-producing-essential-products-70645</a>                                                                 | <b>Pabna BSCIC busy producing essential products</b>                                           |
| 17/04/2020              | <a href="https://www.tbsnews.net/coronavirus-chronicle/covid-19-bangladesh/brac-assist-1-lakh-more-families-cash-70585">https://www.tbsnews.net/coronavirus-chronicle/covid-19-bangladesh/brac-assist-1-lakh-more-families-cash-70585</a>                               | <b>Brac to assist 1 lakh more families with cash</b>                                           |
| 17/04/2020              | <a href="https://www.tbsnews.net/bangladesh/lafargeholcim-bangladesh-employees-be-fully-paid-during-layoff-70573">https://www.tbsnews.net/bangladesh/lafargeholcim-bangladesh-employees-be-fully-paid-during-layoff-70573</a>                                           | <b>LafargeHolcim Bangladesh employees to be fully paid during layoff</b>                       |
| 18/04/2020              | <a href="https://www.tbsnews.net/coronavirus-chronicle/covid-19-bangladesh/bpmca-walton-step-provide-ppes-sylhets-frontline">https://www.tbsnews.net/coronavirus-chronicle/covid-19-bangladesh/bpmca-walton-step-provide-ppes-sylhets-frontline</a>                     | <b>BPMCA, Walton step up to provide PPEs for Sylhet's frontline healthcare professionals</b>   |
| 18/04/2020              | <a href="https://www.tbsnews.net/coronavirus-chronicle/covid-19-bangladesh/chittagong-bourse-supports-4000-shutdown-hit-families">https://www.tbsnews.net/coronavirus-chronicle/covid-19-bangladesh/chittagong-bourse-supports-4000-shutdown-hit-families</a>           | <b>Chittagong bourse supports 4,000 shutdown-hit families</b>                                  |
| 18/04/2020              | <a href="https://www.tbsnews.net/markets/sunamganj-man-surprises-locals-selling-vegetables-token-price-70894">https://www.tbsnews.net/markets/sunamganj-man-surprises-locals-selling-vegetables-token-price-70894</a>                                                   | <b>Sunamganj man surprises locals selling vegetables at token price</b>                        |
| 18/04/2020              | <a href="https://www.tbsnews.net/coronavirus-chronicle/covid-19-bangladesh/grameen-kalyan-offers-healthcare-services-food-support">https://www.tbsnews.net/coronavirus-chronicle/covid-19-bangladesh/grameen-kalyan-offers-healthcare-services-food-support</a>         | <b>Grameen Kalyan offers healthcare services, food support during pandemic</b>                 |
| 18/04/2020              | <a href="https://www.tbsnews.net/economy/rmg/over-95-workers-salary-disbursed-bgmea-70855">https://www.tbsnews.net/economy/rmg/over-95-workers-salary-disbursed-bgmea-70855</a>                                                                                         | <b>Over 95% workers' salary disbursed: BGMEA</b>                                               |
| 19/04/2020              | <a href="https://www.tbsnews.net/coronavirus-chronicle/covid-19-bangladesh/ngo-leaders-reaction-covid-19-response-ensure-inclusive">https://www.tbsnews.net/coronavirus-chronicle/covid-19-bangladesh/ngo-leaders-reaction-covid-19-response-ensure-inclusive</a>       | <b>NGO leaders' reaction to Covid-19 response: Ensure inclusive coordination at all levels</b> |
| 19/04/2020              | <a href="https://www.tbsnews.net/coronavirus-chronicle/covid-19-bangladesh/mr-noodles-lends-hand-coronavirus-hit-people-71377">https://www.tbsnews.net/coronavirus-chronicle/covid-19-bangladesh/mr-noodles-lends-hand-coronavirus-hit-people-71377</a>                 | <b>Mr Noodles lends hand to coronavirus-hit people</b>                                         |
| 19/04/2020              | <a href="https://www.tbsnews.net/coronavirus-chronicle/covid-19-bangladesh/hsbc-continues-supports-keeping-covid-19-impact-down-71362">https://www.tbsnews.net/coronavirus-chronicle/covid-19-bangladesh/hsbc-continues-supports-keeping-covid-19-impact-down-71362</a> | <b>HSBC continues supports for keeping Covid-19 impact down</b>                                |
| 19/04/2020              | <a href="https://www.tbsnews.net/coronavirus-chronicle/covid-19-bangladesh/mushfiqur-puts-historic-bat-auction-raise-funds-against">https://www.tbsnews.net/coronavirus-chronicle/covid-19-bangladesh/mushfiqur-puts-historic-bat-auction-raise-funds-against</a>       | <b>Mushfiqur puts historic bat up for auction to raise funds against virus</b>                 |
| 19/04/2020              | <a href="https://www.tbsnews.net/coronavirus-chronicle/covid-19-bangladesh/front-line-medical-workers-receive-grameen-produced-ppes">https://www.tbsnews.net/coronavirus-chronicle/covid-19-bangladesh/front-line-medical-workers-receive-grameen-produced-ppes</a>     | <b>Front-line medical workers receive Grameen produced PPEs</b>                                |
| 19/04/2020              | <a href="https://www.tbsnews.net/coronavirus-chronicle/covid-19-bangladesh/ksrm-staff-donate-tk30-lakh-wages-chattogram-district">https://www.tbsnews.net/coronavirus-chronicle/covid-19-bangladesh/ksrm-staff-donate-tk30-lakh-wages-chattogram-district</a>           | <b>KSRM staff donate Tk30 lakh from wages to Chattogram district relief fund</b>               |
| 19/04/2020              | <a href="https://www.tbsnews.net/economy/banking/prime-bank-ready-return-deposits-demand-71293">https://www.tbsnews.net/economy/banking/prime-bank-ready-return-deposits-demand-71293</a>                                                                               | <b>Prime Bank to support clients to recoup Covid-19 losses</b>                                 |
| 19/04/2020              | <a href="https://www.tbsnews.net/bangladesh/praava-health-launches-telemedicine-services-during-covid-19-outbreak-71269">https://www.tbsnews.net/bangladesh/praava-health-launches-telemedicine-services-during-covid-19-outbreak-71269</a>                             | <b>Praava Health launches telemedicine services to assist patients during pandemic</b>         |
| 19/04/2020              | <a href="https://www.tbsnews.net/tech/robi-a2i-launch-campaign-finding-ideas-overcome-covid-19-pandemic-71275">https://www.tbsnews.net/tech/robi-a2i-launch-campaign-finding-ideas-overcome-covid-19-pandemic-71275</a>                                                 | <b>Robi, a2i launch campaign finding ideas to overcome Covid-19 pandemic</b>                   |
| 19/04/2020              | <a href="https://www.tbsnews.net/bangladesh/districts/coxda-distributes-relief-goods-among-newspaper-hawkers-71257">https://www.tbsnews.net/bangladesh/districts/coxda-distributes-relief-goods-among-newspaper-hawkers-71257</a>                                       | <b>CoxDA distributes relief goods among newspaper hawkers</b>                                  |

| <b>Date of the news</b> | <b>News URL</b>                                                                                                                                                                                                                                                       | <b>Title of the news</b>                                                                                                     |
|-------------------------|-----------------------------------------------------------------------------------------------------------------------------------------------------------------------------------------------------------------------------------------------------------------------|------------------------------------------------------------------------------------------------------------------------------|
| 20/04/2020              | <a href="https://www.tbsnews.net/economy/guardian-life-insurance-launches-online-claims-tool-amid-shutdown-71719">https://www.tbsnews.net/economy/guardian-life-insurance-launches-online-claims-tool-amid-shutdown-71719</a>                                         | <b>Guardian Life Insurance launches online claims tool amid shutdown</b>                                                     |
| 20/04/2020              | <a href="https://www.tbsnews.net/bangladesh/radisson-blu-chattogram-bay-view-strengthens-community-bond-through-business-activities">https://www.tbsnews.net/bangladesh/radisson-blu-chattogram-bay-view-strengthens-community-bond-through-business-activities</a>   | <b>Radisson Blu Chattogram Bay View strengthens community bond through business activities</b>                               |
| 20/04/2020              | <a href="https://www.tbsnews.net/coronavirus-chronicle/covid-19-bangladesh/sp-blames-rmg-workers-coronavirus-spread-gazipur-71488">https://www.tbsnews.net/coronavirus-chronicle/covid-19-bangladesh/sp-blames-rmg-workers-coronavirus-spread-gazipur-71488</a>       | <b>RMG owners blamed for Gazipur virus spike</b>                                                                             |
| 21/04/2020              | <a href="https://www.tbsnews.net/coronavirus-chronicle/covid-19-bangladesh/hamdard-donates-tk25-lakh-pms-relief-fund-72241">https://www.tbsnews.net/coronavirus-chronicle/covid-19-bangladesh/hamdard-donates-tk25-lakh-pms-relief-fund-72241</a>                     | <b>Hamdard donates Tk25 lakh to PM's relief fund</b>                                                                         |
| 21/04/2020              | <a href="https://www.tbsnews.net/coronavirus-chronicle/covid-19-bangladesh/nrbc-bank-continues-distribution-ppes-medical-staff-72235">https://www.tbsnews.net/coronavirus-chronicle/covid-19-bangladesh/nrbc-bank-continues-distribution-ppes-medical-staff-72235</a> | <b>NRBC Bank continues distribution of PPEs for medical staff</b>                                                            |
| 21/04/2020              | <a href="https://www.tbsnews.net/bangladesh/brac-phwc-and-kaan-petey-roi-launch-telecounselling-service-moner-jotno-mobile-e">https://www.tbsnews.net/bangladesh/brac-phwc-and-kaan-petey-roi-launch-telecounselling-service-moner-jotno-mobile-e</a>                 | <b>BRAC, PHWC and Kaan Petey Roi launch Telecounselling service 'Moner Jotno Mobile E' for anxieties related to Covid-19</b> |
| 21/04/2020              | <a href="https://www.tbsnews.net/coronavirus-chronicle/covid-19-bangladesh/covid-19-salma-adil-foundation-distributes-ppe-gazipur">https://www.tbsnews.net/coronavirus-chronicle/covid-19-bangladesh/covid-19-salma-adil-foundation-distributes-ppe-gazipur</a>       | <b>Covid-19: Salma-Adil Foundation distributes PPE in Gazipur</b>                                                            |
| 21/04/2020              | <a href="https://www.tbsnews.net/coronavirus-chronicle/covid-19-bangladesh/gk-covid-19-food-assistance-fund-group-donates-tk11-lakh">https://www.tbsnews.net/coronavirus-chronicle/covid-19-bangladesh/gk-covid-19-food-assistance-fund-group-donates-tk11-lakh</a>   | <b>GK Covid-19 Food Assistance Fund Group donates Tk11 lakh to Gonoshasthaya Kendra for providing food relief</b>            |
| 22/04/2020              | <a href="https://www.tbsnews.net/coronavirus-chronicle/covid-19-bangladesh/birdem-closes-icu-patients-detected-covid-19-72679">https://www.tbsnews.net/coronavirus-chronicle/covid-19-bangladesh/birdem-closes-icu-patients-detected-covid-19-72679</a>               | <b>Birdem closes ICU as patients detected with Covid-19</b>                                                                  |
| 22/04/2020              | <a href="https://www.tbsnews.net/coronavirus-chronicle/covid-19-bangladesh/global-ppe-shortage-amid-covid-19-72649">https://www.tbsnews.net/coronavirus-chronicle/covid-19-bangladesh/global-ppe-shortage-amid-covid-19-72649</a>                                     | <b>Global PPE shortage amid Covid-19</b>                                                                                     |
| 22/04/2020              | <a href="https://www.tbsnews.net/coronavirus-chronicle/covid-19-bangladesh/ceab-distributes-relief-goods-among-250-daily-workers">https://www.tbsnews.net/coronavirus-chronicle/covid-19-bangladesh/ceab-distributes-relief-goods-among-250-daily-workers</a>         | <b>CEAB distributes relief goods among 250 daily workers</b>                                                                 |
| 22/04/2020              | <a href="https://www.tbsnews.net/companies/banglalink-distribute-relief-among-14500-households-association-sena-kalyan-sangstha-and">https://www.tbsnews.net/companies/banglalink-distribute-relief-among-14500-households-association-sena-kalyan-sangstha-and</a>   | <b>Banglalink to distribute relief among 14,500 households in association with Sena Kalyan Sangstha and Army</b>             |
| 22/04/2020              | <a href="https://www.tbsnews.net/coronavirus-chronicle/covid-19-bangladesh/automated-sanitising-chamber-established-chattogram-city">https://www.tbsnews.net/coronavirus-chronicle/covid-19-bangladesh/automated-sanitising-chamber-established-chattogram-city</a>   | <b>Automated sanitising chamber established in Chattogram City Corporation</b>                                               |
| 22/04/2020              | <a href="https://www.tbsnews.net/coronavirus-chronicle/covid-19-bangladesh/four-jashore-hospitals-ready-provide-covid-19-treatment">https://www.tbsnews.net/coronavirus-chronicle/covid-19-bangladesh/four-jashore-hospitals-ready-provide-covid-19-treatment</a>     | <b>Four Jashore hospitals ready to provide Covid-19 treatment</b>                                                            |
| 22/04/2020              | <a href="https://www.tbsnews.net/economy/banking/prime-bank-prioritise-banking-pandemic-could-change-transaction-behaviour-72355">https://www.tbsnews.net/economy/banking/prime-bank-prioritise-banking-pandemic-could-change-transaction-behaviour-72355</a>         | <b>Prime bank to prioritise digital banking as pandemic could change transaction behaviour</b>                               |
| 22/04/2020              | <a href="https://www.tbsnews.net/sports/shakib-puts-world-cup-bat-auction-battle-coronavirus-72259">https://www.tbsnews.net/sports/shakib-puts-world-cup-bat-auction-battle-coronavirus-72259</a>                                                                     | <b>Shakib puts World Cup bat on auction to battle coronavirus</b>                                                            |
| 23/04/2020              | <a href="https://www.tbsnews.net/tech/huawei-extends-device-warranty-avail-best-customer-service-mind-73030">https://www.tbsnews.net/tech/huawei-extends-device-warranty-avail-best-customer-service-mind-73030</a>                                                   | <b>Huawei extends device warranty to avail best customer service in mind</b>                                                 |

| <b>Date of the news</b> | <b>News URL</b>                                                                                                                                                                                                                                                         | <b>Title of the news</b>                                                                |
|-------------------------|-------------------------------------------------------------------------------------------------------------------------------------------------------------------------------------------------------------------------------------------------------------------------|-----------------------------------------------------------------------------------------|
| 23/04/2020              | <a href="https://www.tbsnews.net/companies/grameenphone-starts-distribution-ppe-dghs-designated-hospitals-73027">https://www.tbsnews.net/companies/grameenphone-starts-distribution-ppe-dghs-designated-hospitals-73027</a>                                             | <b>Grameenphone starts the distribution of PPE to DGHS designated hospitals</b>         |
| 23/04/2020              | <a href="https://www.tbsnews.net/coronavirus-chronicle/covid-19-bangladesh/general-holidays-extended-may-5-butfactories-reopen-phases">https://www.tbsnews.net/coronavirus-chronicle/covid-19-bangladesh/general-holidays-extended-may-5-butfactories-reopen-phases</a> | <b>Factories to open ensuring safety, public transport will resume gradually</b>        |
| 23/04/2020              | <a href="https://www.tbsnews.net/coronavirus-chronicle/covid-19-bangladesh/marico-fbcci-distributing-food-among-5000-families-gazipur">https://www.tbsnews.net/coronavirus-chronicle/covid-19-bangladesh/marico-fbcci-distributing-food-among-5000-families-gazipur</a> | <b>Marico, FBCCI distributing food among 5,000 families in Gazipur</b>                  |
| 24/04/2020              | <a href="https://www.tbsnews.net/bangladesh/grameenphone-brac-team-help-one-lakh-poor-families-73366">https://www.tbsnews.net/bangladesh/grameenphone-brac-team-help-one-lakh-poor-families-73366</a>                                                                   | <b>Grameenphone, Brac team up to help one lakh poor families</b>                        |
| 24/04/2020              | <a href="https://www.tbsnews.net/tech/adb-aim-launch-global-hackathon-digital-ideas-respond-covid-19-crisis-73315">https://www.tbsnews.net/tech/adb-aim-launch-global-hackathon-digital-ideas-respond-covid-19-crisis-73315</a>                                         | <b>ADB, AIM launch global hackathon for digital ideas to respond to Covid-19 crisis</b> |
| 25/04/2020              | <a href="https://www.tbsnews.net/companies/akij-stands-beside-covid-19-fighters-73783">https://www.tbsnews.net/companies/akij-stands-beside-covid-19-fighters-73783</a>                                                                                                 | <b>Akij stands beside Covid-19 fighters</b>                                             |
| 25/04/2020              | <a href="https://www.tbsnews.net/economy/rmg/do-not-ask-workers-return-dhaka-bgmea-advises-its-members-73447">https://www.tbsnews.net/economy/rmg/do-not-ask-workers-return-dhaka-bgmea-advises-its-members-73447</a>                                                   | <b>BGMEA advises not to ask workers to return to Dhaka</b>                              |
| 26/04/2020              | <a href="https://www.tbsnews.net/coronavirus-chronicle/covid-19-bangladesh/kit-wont-be-handed-over-third-party-zafrullah-74146">https://www.tbsnews.net/coronavirus-chronicle/covid-19-bangladesh/kit-wont-be-handed-over-third-party-zafrullah-74146</a>               | <b>Kit won't be handed over to third party: Zafrullah</b>                               |
| 26/04/2020              | <a href="https://www.tbsnews.net/economy/banking/prime-bank-simplifies-internet-banking-registration-promote-digital-banking-74152">https://www.tbsnews.net/economy/banking/prime-bank-simplifies-internet-banking-registration-promote-digital-banking-74152</a>       | <b>Prime Bank simplifies Internet Banking registration to promote digital banking</b>   |
| 26/04/2020              | <a href="https://www.tbsnews.net/bangladesh/health/covid-19-gazi-group-donates-ppes-6-hospitals-dhaka-74047">https://www.tbsnews.net/bangladesh/health/covid-19-gazi-group-donates-ppes-6-hospitals-dhaka-74047</a>                                                     | <b>Covid-19: Gazi Group donates PPEs to 6 hospitals in Dhaka</b>                        |
| 26/04/2020              | <a href="https://www.tbsnews.net/bangladesh/yfb-arranges-iftar-500-people-74035">https://www.tbsnews.net/bangladesh/yfb-arranges-iftar-500-people-74035</a>                                                                                                             | <b>YFB arranges iftar for 500 people</b>                                                |
| 26/04/2020              | <a href="https://www.tbsnews.net/bangladesh/health/praava-health-launches-covid-19-self-assessment-tool-chatbot-and-web-page-74002">https://www.tbsnews.net/bangladesh/health/praava-health-launches-covid-19-self-assessment-tool-chatbot-and-web-page-74002</a>       | <b>Praava Health launches self-assessment tool, webpage to bust Covid-19 myths</b>      |
| 27/04/2020              | <a href="https://www.tbsnews.net/coronavirus-chronicle/covid-19-bangladesh/grameen-shakti-provides-food-aid-300-underprivileged">https://www.tbsnews.net/coronavirus-chronicle/covid-19-bangladesh/grameen-shakti-provides-food-aid-300-underprivileged</a>             | <b>Grameen Shakti provides food aid to 300 underprivileged families</b>                 |
| 27/04/2020              | <a href="https://www.tbsnews.net/economy/stock/icab-issues-covid-19-guidelines-accountants-74182">https://www.tbsnews.net/economy/stock/icab-issues-covid-19-guidelines-accountants-74182</a>                                                                           | <b>ICAB issues COVID-19 guidelines for accountants</b>                                  |
| 28/04/2020              | <a href="https://www.tbsnews.net/coronavirus-chronicle/covid-19-bangladesh/pksf-affiliates-donate-tk27-crore-poor-74887">https://www.tbsnews.net/coronavirus-chronicle/covid-19-bangladesh/pksf-affiliates-donate-tk27-crore-poor-74887</a>                             | <b>PKSF affiliates donate Tk27 crore for the poor</b>                                   |
| 28/04/2020              | <a href="https://www.tbsnews.net/coronavirus-chronicle/covid-19-bangladesh/obhai-brings-medical-emergency-transport-service-74845">https://www.tbsnews.net/coronavirus-chronicle/covid-19-bangladesh/obhai-brings-medical-emergency-transport-service-74845</a>         | <b>OBHAI brings medical emergency transport service</b>                                 |
| 28/04/2020              | <a href="https://www.tbsnews.net/coronavirus-chronicle/covid-19-bangladesh/rmg-owners-help-workers-if-get-infected-coronavirus-home">https://www.tbsnews.net/coronavirus-chronicle/covid-19-bangladesh/rmg-owners-help-workers-if-get-infected-coronavirus-home</a>     | <b>RMG owners to help workers if get infected with coronavirus: Home minister</b>       |
| 28/04/2020              | <a href="https://www.tbsnews.net/coronavirus-chronicle/covid-19-bangladesh/mtb-employees-donate-one-day-salary-help-poor-74653">https://www.tbsnews.net/coronavirus-chronicle/covid-19-bangladesh/mtb-employees-donate-one-day-salary-help-poor-74653</a>               | <b>MTB employees donate one-day salary to help poor</b>                                 |
| 29/04/2020              | <a href="https://www.tbsnews.net/coronavirus-chronicle/covid-19-bangladesh/covid-19-pepsico-brac-provide-14-million-meals-underserved">https://www.tbsnews.net/coronavirus-chronicle/covid-19-bangladesh/covid-19-pepsico-brac-provide-14-million-meals-underserved</a> | <b>Covid-19: PepsiCo, BRAC to provide 1.4 million meals to underserved families</b>     |
| 29/04/2020              | <a href="https://www.tbsnews.net/coronavirus-chronicle/covid-19-bangladesh/sylhet-mp-lauded-serving-constituency-amid-covid-19">https://www.tbsnews.net/coronavirus-chronicle/covid-19-bangladesh/sylhet-mp-lauded-serving-constituency-amid-covid-19</a>               | <b>Sylhet MP lauded for serving constituency amid Covid-19 outbreak</b>                 |
| 29/04/2020              | <a href="https://www.tbsnews.net/economy/trade/walton-opens-e-sales-amid-lockdown-75403">https://www.tbsnews.net/economy/trade/walton-opens-e-sales-amid-lockdown-75403</a>                                                                                             | <b>Walton opens e-sales amid lockdown</b>                                               |



| <b>Date of the news</b> | <b>News URL</b>                                                                                                                                                                                                                                                       | <b>Title of the news</b>                                                              |
|-------------------------|-----------------------------------------------------------------------------------------------------------------------------------------------------------------------------------------------------------------------------------------------------------------------|---------------------------------------------------------------------------------------|
| 29/04/2020              | <a href="https://www.tbsnews.net/coronavirus-chronicle/covid-19-bangladesh/first-private-covid-19-testing-lab-launched-narayanganj">https://www.tbsnews.net/coronavirus-chronicle/covid-19-bangladesh/first-private-covid-19-testing-lab-launched-narayanganj</a>     | <b>First private Covid-19 testing lab launched in Narayanganj</b>                     |
| 29/04/2020              | <a href="https://www.tbsnews.net/coronavirus-chronicle/covid-19-bangladesh/lafargeholcim-distributes-food-packets-and-masks-amid">https://www.tbsnews.net/coronavirus-chronicle/covid-19-bangladesh/lafargeholcim-distributes-food-packets-and-masks-amid</a>         | <b>LafargeHolcim distributes food packets and masks amid Covid-19</b>                 |
| 29/04/2020              | <a href="https://www.tbsnews.net/coronavirus-chronicle/covid-19-bangladesh/man-who-put-his-life-danger-save-others-75124">https://www.tbsnews.net/coronavirus-chronicle/covid-19-bangladesh/man-who-put-his-life-danger-save-others-75124</a>                         | <b>The man who put his life in danger to save others</b>                              |
| 30/04/2020              | <a href="https://www.tbsnews.net/bangladesh/eu-contributes-tk230cr-strengthen-social-security-bangladesh-75820">https://www.tbsnews.net/bangladesh/eu-contributes-tk230cr-strengthen-social-security-bangladesh-75820</a>                                             | <b>EU contributes Tk230cr to strengthen social security in Bangladesh</b>             |
| 30/04/2020              | <a href="https://www.tbsnews.net/coronavirus-chronicle/covid-19-bangladesh/amar-daktar-provide-health-services-during-pandemic-75823">https://www.tbsnews.net/coronavirus-chronicle/covid-19-bangladesh/amar-daktar-provide-health-services-during-pandemic-75823</a> | <b>Amar Daktar to provide health services during pandemic</b>                         |
| 30/04/2020              | <a href="https://www.tbsnews.net/coronavirus-chronicle/covid-19-bangladesh/six-leading-agencies-join-forces-tackle-covid-19">https://www.tbsnews.net/coronavirus-chronicle/covid-19-bangladesh/six-leading-agencies-join-forces-tackle-covid-19</a>                   | <b>AHP along with 6 leading agencies join forces to tackle Covid-19 in Bangladesh</b> |
| 30/04/2020              | <a href="https://www.tbsnews.net/coronavirus-chronicle/covid-19-bangladesh/gonoshasthaya-covid-19-testing-kit-permitted-trial-75628">https://www.tbsnews.net/coronavirus-chronicle/covid-19-bangladesh/gonoshasthaya-covid-19-testing-kit-permitted-trial-75628</a>   | <b>Gonoshasthaya's Covid-19 testing kit permitted for trial</b>                       |
| 30/04/2020              | <a href="https://www.tbsnews.net/coronavirus-chronicle/covid-19-bangladesh/tofail-ahmed-gives-relief-10000-families-private-fund">https://www.tbsnews.net/coronavirus-chronicle/covid-19-bangladesh/tofail-ahmed-gives-relief-10000-families-private-fund</a>         | <b>Tofail Ahmed gives relief to 10,000 families from private fund</b>                 |
| 30/04/2020              | <a href="https://www.tbsnews.net/coronavirus-chronicle/covid-19-bangladesh/bgmea-forms-committees-inspect-factories-amid-covid-19">https://www.tbsnews.net/coronavirus-chronicle/covid-19-bangladesh/bgmea-forms-committees-inspect-factories-amid-covid-19</a>       | <b>BGMEA forms committees to inspect factories amid Covid-19</b>                      |
| 30/04/2020              | <a href="https://www.tbsnews.net/coronavirus-chronicle/covid-19-bangladesh/nrbc-bank-provides-ppe-among-front-liners-4-places-75529">https://www.tbsnews.net/coronavirus-chronicle/covid-19-bangladesh/nrbc-bank-provides-ppe-among-front-liners-4-places-75529</a>   | <b>NRBC bank provides PPE among front liners in 4 places</b>                          |
| 01/05/2020              | <a href="https://www.tbsnews.net/coronavirus-chronicle/covid-19-bangladesh/sena-kalyan-sangstha-continues-exemplary-effort-tackle">https://www.tbsnews.net/coronavirus-chronicle/covid-19-bangladesh/sena-kalyan-sangstha-continues-exemplary-effort-tackle</a>       | <b>Sena Kalyan Sangstha continues exemplary effort to tackle Covid-19 crisis</b>      |
| 01/05/2020              | <a href="https://www.tbsnews.net/coronavirus-chronicle/covid-19-bangladesh/ideb-cell-makes-nirapad-nagarik-chamber-disinfection">https://www.tbsnews.net/coronavirus-chronicle/covid-19-bangladesh/ideb-cell-makes-nirapad-nagarik-chamber-disinfection</a>           | <b>IDEB cell makes 'Nirapad Nagarik Chamber' disinfection tunnel</b>                  |
| 01/05/2020              | <a href="https://www.tbsnews.net/coronavirus-chronicle/covid-19-bangladesh/two-friends-initiative-help-people-affected-coronavirus">https://www.tbsnews.net/coronavirus-chronicle/covid-19-bangladesh/two-friends-initiative-help-people-affected-coronavirus</a>     | <b>Two friends' initiative to help people affected by coronavirus</b>                 |
| 01/05/2020              | <a href="https://www.tbsnews.net/coronavirus-chronicle/covid-19-bangladesh/7-more-rmg-workers-infected-coronavirus-savar-76078">https://www.tbsnews.net/coronavirus-chronicle/covid-19-bangladesh/7-more-rmg-workers-infected-coronavirus-savar-76078</a>             | <b>7 more RMG workers infected with coronavirus in Savar</b>                          |
| 01/05/2020              | <a href="https://www.tbsnews.net/coronavirus-chronicle/covid-19-bangladesh/esdo-calls-protecting-health-safety-frontline-workers">https://www.tbsnews.net/coronavirus-chronicle/covid-19-bangladesh/esdo-calls-protecting-health-safety-frontline-workers</a>         | <b>ESDO calls for protecting health, safety of frontline workers</b>                  |
| 01/05/2020              | <a href="https://www.tbsnews.net/coronavirus-chronicle/covid-19-bangladesh/mothers-battle-get-her-children-tested-coronavirus-75901">https://www.tbsnews.net/coronavirus-chronicle/covid-19-bangladesh/mothers-battle-get-her-children-tested-coronavirus-75901</a>   | <b>A mother's battle to get her children tested for coronavirus</b>                   |
| 02/05/2020              | <a href="https://www.tbsnews.net/coronavirus-chronicle/covid-19-bangladesh/9-more-rmg-workers-tested-positive-covid-19-76441">https://www.tbsnews.net/coronavirus-chronicle/covid-19-bangladesh/9-more-rmg-workers-tested-positive-covid-19-76441</a>                 | <b>9 More RMG workers tested positive for Covid-19</b>                                |
| 02/05/2020              | <a href="https://www.tbsnews.net/economy/banking/bangladesh-bank-creates-money-worth-over-tk70000cr-revive-economy-76435">https://www.tbsnews.net/economy/banking/bangladesh-bank-creates-money-worth-over-tk70000cr-revive-economy-76435</a>                         | <b>Bangladesh Bank creates money worth over Tk70,000cr to revive economy</b>          |

| <b>Date of the news</b> | <b>News URL</b>                                                                                                                                                                                                                                                         | <b>Title of the news</b>                                                                   |
|-------------------------|-------------------------------------------------------------------------------------------------------------------------------------------------------------------------------------------------------------------------------------------------------------------------|--------------------------------------------------------------------------------------------|
| 02/05/2020              | <a href="https://www.tbsnews.net/economy/welfare-oriented-budget-cards-ease-covid-19-fallout-76432">https://www.tbsnews.net/economy/welfare-oriented-budget-cards-ease-covid-19-fallout-76432</a>                                                                       | <b>Welfare-oriented budget on cards to ease Covid-19 fallout</b>                           |
| 02/05/2020              | <a href="https://www.tbsnews.net/coronavirus-chronicle/covid-19-bangladesh/two-garment-workers-found-positive-covid-19-khulna-76411">https://www.tbsnews.net/coronavirus-chronicle/covid-19-bangladesh/two-garment-workers-found-positive-covid-19-khulna-76411</a>     | <b>Two garment workers found positive for Covid-19 in Khulna</b>                           |
| 02/05/2020              | <a href="https://www.tbsnews.net/coronavirus-chronicle/covid-19-bangladesh/rajshahi-bscic-making-1200-litre-hand-sanitizer-daily">https://www.tbsnews.net/coronavirus-chronicle/covid-19-bangladesh/rajshahi-bscic-making-1200-litre-hand-sanitizer-daily</a>           | <b>Rajshahi BSCIC making 1,200 litre hand sanitizer daily</b>                              |
| 02/05/2020              | <a href="https://www.tbsnews.net/coronavirus-chronicle/covid-19-bangladesh/dmch-burn-unit-starts-admitting-covid-19-patients-76384">https://www.tbsnews.net/coronavirus-chronicle/covid-19-bangladesh/dmch-burn-unit-starts-admitting-covid-19-patients-76384</a>       | <b>DMCH burn unit starts admitting Covid-19 patients</b>                                   |
| 02/05/2020              | <a href="https://www.tbsnews.net/economy/trade/bsti-issuing-quicker-clearance-imported-goods-76381">https://www.tbsnews.net/economy/trade/bsti-issuing-quicker-clearance-imported-goods-76381</a>                                                                       | <b>BSTI issuing quicker clearance for imported goods</b>                                   |
| 02/05/2020              | <a href="https://www.tbsnews.net/coronavirus-chronicle/covid-19-bangladesh/bsmmu-committee-formed-evaluate-gonoshasthayas-kit-76363">https://www.tbsnews.net/coronavirus-chronicle/covid-19-bangladesh/bsmmu-committee-formed-evaluate-gonoshasthayas-kit-76363</a>     | <b>BSMMU committee formed to evaluate Gonoshasthaya's kit</b>                              |
| 02/05/2020              | <a href="https://www.tbsnews.net/coronavirus-chronicle/covid-19-bangladesh/bangladesh-extends-suspension-visa-arrival-till-may-7">https://www.tbsnews.net/coronavirus-chronicle/covid-19-bangladesh/bangladesh-extends-suspension-visa-arrival-till-may-7</a>           | <b>Bangladesh extends suspension of visa-on-arrival till May 7</b>                         |
| 02/05/2020              | <a href="https://www.tbsnews.net/coronavirus-chronicle/wateraid-develops-easy-use-hand-washing-station-manual-fight-covid-19-76312">https://www.tbsnews.net/coronavirus-chronicle/wateraid-develops-easy-use-hand-washing-station-manual-fight-covid-19-76312</a>       | <b>WaterAid develops 'easy-to-use' hand washing station manual to fight Covid-19</b>       |
| 02/05/2020              | <a href="https://www.tbsnews.net/coronavirus-chronicle/covid-19-bangladesh/cf-agents-bangladesh-and-india-hold-meeting-start-business">https://www.tbsnews.net/coronavirus-chronicle/covid-19-bangladesh/cf-agents-bangladesh-and-india-hold-meeting-start-business</a> | <b>C&amp;F agents of Bangladesh and India hold meeting to start business</b>               |
| 02/05/2020              | <a href="https://www.tbsnews.net/economy/banking/brac-bank-enhances-services-support-community-during-pandemic-76402">https://www.tbsnews.net/economy/banking/brac-bank-enhances-services-support-community-during-pandemic-76402</a>                                   | <b>Brac Bank enhances services to support community during pandemic</b>                    |
| 03/05/2020              | <a href="https://www.tbsnews.net/coronavirus-chronicle/covid-19-bangladesh/entertainment-industry-anxious-about-massive-losses-eid">https://www.tbsnews.net/coronavirus-chronicle/covid-19-bangladesh/entertainment-industry-anxious-about-massive-losses-eid</a>       | <b>Entertainment industry anxious about massive losses this Eid season</b>                 |
| 03/05/2020              | <a href="https://www.tbsnews.net/coronavirus-chronicle/covid-19-bangladesh/grameen-telecom-provide-1-million-non-medical-face-masks">https://www.tbsnews.net/coronavirus-chronicle/covid-19-bangladesh/grameen-telecom-provide-1-million-non-medical-face-masks</a>     | <b>Grameen Telecom to provide 1 million non-medical face masks for free</b>                |
| 03/05/2020              | <a href="https://www.tbsnews.net/economy/debt-relief-tk27000-crore-bangladesh-76795">https://www.tbsnews.net/economy/debt-relief-tk27000-crore-bangladesh-76795</a>                                                                                                     | <b>Debt relief of Tk2,700 crore for Bangladesh</b>                                         |
| 03/05/2020              | <a href="https://www.tbsnews.net/coronavirus-chronicle/covid-19-bangladesh/committees-formed-face-covid-19-get-next-zero-attention">https://www.tbsnews.net/coronavirus-chronicle/covid-19-bangladesh/committees-formed-face-covid-19-get-next-zero-attention</a>       | <b>Committees formed to face Covid-19 get next to zero attention</b>                       |
| 03/05/2020              | <a href="https://www.tbsnews.net/companies/runner-announces-full-salary-no-job-cut-76789">https://www.tbsnews.net/companies/runner-announces-full-salary-no-job-cut-76789</a>                                                                                           | <b>Runner announces full salary, no job cut</b>                                            |
| 03/05/2020              | <a href="https://www.tbsnews.net/coronavirus-chronicle/covid-19-bangladesh/nrbc-bank-provides-protective-equipment-journalists-76714">https://www.tbsnews.net/coronavirus-chronicle/covid-19-bangladesh/nrbc-bank-provides-protective-equipment-journalists-76714</a>   | <b>NRBC Bank provides protective equipment to journalists</b>                              |
| 03/05/2020              | <a href="https://www.tbsnews.net/companies/uninterrupted-mobile-services-ensured-mobile-recharge-during-lockdown-through-bkash-76690">https://www.tbsnews.net/companies/uninterrupted-mobile-services-ensured-mobile-recharge-during-lockdown-through-bkash-76690</a>   | <b>Uninterrupted mobile services ensured mobile recharge during lockdown through bKash</b> |
| 03/05/2020              | <a href="https://www.tbsnews.net/coronavirus-chronicle/covid-19-bangladesh/bidyanondo-suhana-anis-ahmed-foundation-team-feed-poor">https://www.tbsnews.net/coronavirus-chronicle/covid-19-bangladesh/bidyanondo-suhana-anis-ahmed-foundation-team-feed-poor</a>         | <b>Bidyanondo, Suhana &amp; Anis Ahmed Foundation team up to feed the poor</b>             |
| 03/05/2020              | <a href="https://www.tbsnews.net/bangladesh/health/unilever-bangladesh-supports-icddrbs-ongoing-covid-19-emergency-response-76645">https://www.tbsnews.net/bangladesh/health/unilever-bangladesh-supports-icddrbs-ongoing-covid-19-emergency-response-76645</a>         | <b>Unilever Bangladesh supports icddr,b's ongoing Covid-19 emergency response</b>          |

| <b>Date of the news</b> | <b>News URL</b>                                                                                                                                                                                                                                                         | <b>Title of the news</b>                                                                |
|-------------------------|-------------------------------------------------------------------------------------------------------------------------------------------------------------------------------------------------------------------------------------------------------------------------|-----------------------------------------------------------------------------------------|
| 04/05/2020              | <a href="https://www.tbsnews.net/coronavirus-chronicle/covid-19-bangladesh/standard-bank-employees-provide-food-30000-families-77200">https://www.tbsnews.net/coronavirus-chronicle/covid-19-bangladesh/standard-bank-employees-provide-food-30000-families-77200</a>   | <b>Standard Bank employees provide food for 30,000 families</b>                         |
| 04/05/2020              | <a href="https://www.tbsnews.net/coronavirus-chronicle/covid-19-bangladesh/covid-19-rehab-starts-providing-meals-its-workers-77158">https://www.tbsnews.net/coronavirus-chronicle/covid-19-bangladesh/covid-19-rehab-starts-providing-meals-its-workers-77158</a>       | <b>Covid-19: REHAB starts providing meals to its workers</b>                            |
| 04/05/2020              | <a href="https://www.tbsnews.net/bangladesh/bpmca-withdraws-decision-cut-salaries-and-bonuses-over-doctors-protest-77086">https://www.tbsnews.net/bangladesh/bpmca-withdraws-decision-cut-salaries-and-bonuses-over-doctors-protest-77086</a>                           | <b>BPMCA withdraws decision to cut salaries and bonuses over doctors' protest</b>       |
| 04/05/2020              | <a href="https://www.tbsnews.net/coronavirus-chronicle/covid-19-bangladesh/share-your-fare-initiative-aiming-support-marginalised">https://www.tbsnews.net/coronavirus-chronicle/covid-19-bangladesh/share-your-fare-initiative-aiming-support-marginalised</a>         | <b>'Share Your Fare': An initiative aiming to support marginalised Rickshaw Pullers</b> |
| 04/05/2020              | <a href="https://www.tbsnews.net/coronavirus-chronicle/covid-19-bangladesh/restrictions-ease-covid-19-infections-spike-77251">https://www.tbsnews.net/coronavirus-chronicle/covid-19-bangladesh/restrictions-ease-covid-19-infections-spike-77251</a>                   | <b>Restrictions ease as Covid-19 infections spike</b>                                   |
| 05/05/2020              | <a href="https://www.tbsnews.net/coronavirus-chronicle/covid-19-bangladesh/90-health-workers-including-15-doctors-test-positive-covid">https://www.tbsnews.net/coronavirus-chronicle/covid-19-bangladesh/90-health-workers-including-15-doctors-test-positive-covid</a> | <b>90 health workers including 15 doctors test positive for Covid-19 in Narayanganj</b> |
| 05/05/2020              | <a href="https://www.tbsnews.net/economy/banking/banks-will-not-pay-more-double-salary-attending-office-77617">https://www.tbsnews.net/economy/banking/banks-will-not-pay-more-double-salary-attending-office-77617</a>                                                 | <b>Banks will not pay more than double salary for attending office</b>                  |
| 06/05/2020              | <a href="https://www.tbsnews.net/economy/here-comes-pay-chop-78145">https://www.tbsnews.net/economy/here-comes-pay-chop-78145</a>                                                                                                                                       | <b>Here comes the pay chop</b>                                                          |
| 06/05/2020              | <a href="https://www.tbsnews.net/economy/health-ministry-formulates-technical-guidelines-resume-economic-activities-78115">https://www.tbsnews.net/economy/health-ministry-formulates-technical-guidelines-resume-economic-activities-78115</a>                         | <b>Shoppers have to go through thermal scanner</b>                                      |
| 06/05/2020              | <a href="https://www.tbsnews.net/economy/covid-19-cost-bangladesh-tourism-sector-tk40bn-unwto-78118">https://www.tbsnews.net/economy/covid-19-cost-bangladesh-tourism-sector-tk40bn-unwto-78118</a>                                                                     | <b>Covid-19 to cost Bangladesh tourism sector Tk40bn: UNWTO</b>                         |
| 06/05/2020              | <a href="https://www.tbsnews.net/coronavirus-chronicle/covid-19-bangladesh/govt-waives-vat-ppe-surgical-mask-78067">https://www.tbsnews.net/coronavirus-chronicle/covid-19-bangladesh/govt-waives-vat-ppe-surgical-mask-78067</a>                                       | <b>Govt waives VAT on PPE, surgical mask</b>                                            |
| 06/05/2020              | <a href="https://www.tbsnews.net/coronavirus-chronicle/covid-19-bangladesh/spike-covid-19-cases-after-garments-factories-reopen">https://www.tbsnews.net/coronavirus-chronicle/covid-19-bangladesh/spike-covid-19-cases-after-garments-factories-reopen</a>             | <b>Spike in Covid-19 cases after garments factories reopen in Narayanganj</b>           |
| 07/05/2020              | <a href="https://www.tbsnews.net/coronavirus-chronicle/covid-19-bangladesh/ksrm-provides-ppe-satkania-police-78649">https://www.tbsnews.net/coronavirus-chronicle/covid-19-bangladesh/ksrm-provides-ppe-satkania-police-78649</a>                                       | <b>KSRM provides PPE to Satkania police</b>                                             |
| 07/05/2020              | <a href="https://www.tbsnews.net/coronavirus-chronicle/covid-19-bangladesh/us-govt-provides-over-22-million-fight-covid-19-bangladesh">https://www.tbsnews.net/coronavirus-chronicle/covid-19-bangladesh/us-govt-provides-over-22-million-fight-covid-19-bangladesh</a> | <b>US Govt provides over \$22 million to fight Covid-19 in Bangladesh</b>               |
| 07/05/2020              | <a href="https://www.tbsnews.net/coronavirus-chronicle/covid-19-bangladesh/evaly-donates-personal-health-safety-equipment-cttc-78391">https://www.tbsnews.net/coronavirus-chronicle/covid-19-bangladesh/evaly-donates-personal-health-safety-equipment-cttc-78391</a>   | <b>Evaly donates personal health safety equipment for CTTC</b>                          |
| 08/05/2020              | <a href="https://www.tbsnews.net/coronavirus-chronicle/covid-19-bangladesh/covid-19-medicine-bangladesh-only-two-weeks-away-78976">https://www.tbsnews.net/coronavirus-chronicle/covid-19-bangladesh/covid-19-medicine-bangladesh-only-two-weeks-away-78976</a>         | <b>Covid-19 medicine in Bangladesh only two weeks away</b>                              |
| 08/05/2020              | <a href="https://www.tbsnews.net/coronavirus-chronicle/covid-19-bangladesh/gonoshasthaya-kit-performance-trial-likely-begin-sunday">https://www.tbsnews.net/coronavirus-chronicle/covid-19-bangladesh/gonoshasthaya-kit-performance-trial-likely-begin-sunday</a>       | <b>Gonoshasthaya kit performance trial likely to begin Sunday</b>                       |
| 08/05/2020              | <a href="https://www.tbsnews.net/economy/rmg/10-rmg-workers-contract-covid-19-gazipur-78940">https://www.tbsnews.net/economy/rmg/10-rmg-workers-contract-covid-19-gazipur-78940</a>                                                                                     | <b>10 RMG workers contract Covid-19 in Gazipur</b>                                      |
| 08/05/2020              | <a href="https://www.tbsnews.net/coronavirus-chronicle/covid-19-bangladesh/coronavirus-sylhet-shopping-malls-markets-will-be-shut">https://www.tbsnews.net/coronavirus-chronicle/covid-19-bangladesh/coronavirus-sylhet-shopping-malls-markets-will-be-shut</a>         | <b>Coronavirus: Sylhet shopping malls, markets will be shut until Eid</b>               |
| 08/05/2020              | <a href="https://www.tbsnews.net/coronavirus-chronicle/covid-19-bangladesh/impulse-hospital-treat-covid-19-positive-policemen-78841">https://www.tbsnews.net/coronavirus-chronicle/covid-19-bangladesh/impulse-hospital-treat-covid-19-positive-policemen-78841</a>     | <b>Impulse Hospital to treat Covid-19 positive policemen</b>                            |

| <b>Date of the news</b> | <b>News URL</b>                                                                                                                                                                                                                                                     | <b>Title of the news</b>                                                                      |
|-------------------------|---------------------------------------------------------------------------------------------------------------------------------------------------------------------------------------------------------------------------------------------------------------------|-----------------------------------------------------------------------------------------------|
| 08/05/2020              | <a href="https://www.tbsnews.net/coronavirus-chronicle/covid-19-bangladesh/they-distribute-food-needy-amid-pandemic-78754">https://www.tbsnews.net/coronavirus-chronicle/covid-19-bangladesh/they-distribute-food-needy-amid-pandemic-78754</a>                     | <b>They distribute food to the needy amid the pandemic</b>                                    |
| 08/05/2020              | <a href="https://www.tbsnews.net/economy/5-star-hotels-seeking-alternative-opportunities-recover-losses-78748">https://www.tbsnews.net/economy/5-star-hotels-seeking-alternative-opportunities-recover-losses-78748</a>                                             | <b>5-star hotels seeking alternative opportunities to recover losses</b>                      |
| 09/05/2020              | <a href="https://www.tbsnews.net/economy/rmg/bgmea-requests-members-not-terminate-workers-may-79378">https://www.tbsnews.net/economy/rmg/bgmea-requests-members-not-terminate-workers-may-79378</a>                                                                 | <b>BGMEA requests members not to terminate workers in May</b>                                 |
| 09/05/2020              | <a href="https://www.tbsnews.net/markets/coxs-bazar-ctg-and-mymensingh-markets-not-reopen-eid-79297">https://www.tbsnews.net/markets/coxs-bazar-ctg-and-mymensingh-markets-not-reopen-eid-79297</a>                                                                 | <b>Cox's Bazar, Rajshahi, Ctg and Mymensingh markets not to reopen before Eid</b>             |
| 09/05/2020              | <a href="https://www.tbsnews.net/coronavirus-chronicle/covid-19-bangladesh/sajida-foundations-contribution-health-finance-and">https://www.tbsnews.net/coronavirus-chronicle/covid-19-bangladesh/sajida-foundations-contribution-health-finance-and</a>             | <b>Sajida foundation's contribution to health, finance and awareness amid Covid-19 crisis</b> |
| 10/05/2020              | <a href="https://www.tbsnews.net/coronavirus-chronicle/covid-19-bangladesh/max-group-donates-tk3-crore-pms-relief-and-welfare-fund">https://www.tbsnews.net/coronavirus-chronicle/covid-19-bangladesh/max-group-donates-tk3-crore-pms-relief-and-welfare-fund</a>   | <b>MAX Group donates Tk3 crore to PM's relief and welfare fund</b>                            |
| 10/05/2020              | <a href="https://www.tbsnews.net/coronavirus-chronicle/covid-19-bangladesh/covid-19-cse-donates-tk25-lakh-pms-relief-fund-79729">https://www.tbsnews.net/coronavirus-chronicle/covid-19-bangladesh/covid-19-cse-donates-tk25-lakh-pms-relief-fund-79729</a>         | <b>Covid-19: CSE donates Tk25 lakh to PM's relief fund</b>                                    |
| 10/05/2020              | <a href="https://www.tbsnews.net/coronavirus-chronicle/covid-19-bangladesh/bashundhara-group-donates-safety-equipment-bqb-79699">https://www.tbsnews.net/coronavirus-chronicle/covid-19-bangladesh/bashundhara-group-donates-safety-equipment-bqb-79699</a>         | <b>Bashundhara Group donates safety equipment to BGB</b>                                      |
| 10/05/2020              | <a href="https://www.tbsnews.net/coronavirus-chronicle/covid-19-bangladesh/cartoon-people-and-a2i-organises-cartoon-contest-raise">https://www.tbsnews.net/coronavirus-chronicle/covid-19-bangladesh/cartoon-people-and-a2i-organises-cartoon-contest-raise</a>     | <b>Cartoon People and a2i organises cartoon contest to raise coronavirus awareness</b>        |
| 10/05/2020              | <a href="https://www.tbsnews.net/coronavirus-chronicle/covid-19-bangladesh/holy-family-hospital-dedicated-covid-19-patients-79672">https://www.tbsnews.net/coronavirus-chronicle/covid-19-bangladesh/holy-family-hospital-dedicated-covid-19-patients-79672</a>     | <b>Holy Family hospital dedicated for Covid-19 patients</b>                                   |
| 10/05/2020              | <a href="https://www.tbsnews.net/coronavirus-chronicle/covid-19-bangladesh/nestle-donates-covid-19-relief-pms-fund-79537">https://www.tbsnews.net/coronavirus-chronicle/covid-19-bangladesh/nestle-donates-covid-19-relief-pms-fund-79537</a>                       | <b>Nestle donates Covid-19 relief in PM's fund</b>                                            |
| 10/05/2020              | <a href="https://www.tbsnews.net/coronavirus-chronicle/covid-19-bangladesh/bgmea-launches-covid-19-test-centre-rmg-workers-79444">https://www.tbsnews.net/coronavirus-chronicle/covid-19-bangladesh/bgmea-launches-covid-19-test-centre-rmg-workers-79444</a>       | <b>BGMEA launches Covid-19 test centre for RMG workers</b>                                    |
| 11/05/2020              | <a href="https://www.tbsnews.net/economy/aviation/flight-social-distancing-worsen-airline-woe-80224">https://www.tbsnews.net/economy/aviation/flight-social-distancing-worsen-airline-woe-80224</a>                                                                 | <b>In-flight social distancing to worsen airline woe</b>                                      |
| 11/05/2020              | <a href="https://www.tbsnews.net/bangladesh/health/private-hospitals-lose-licence-refusing-covid-19-patients-80218">https://www.tbsnews.net/bangladesh/health/private-hospitals-lose-licence-refusing-covid-19-patients-80218</a>                                   | <b>Private hospitals to lose licence for refusing emergency patients or anybody</b>           |
| 11/05/2020              | <a href="https://www.tbsnews.net/bangladesh/health/covid-19-sample-collection-booth-opens-dhaka-reporters-unity-80194">https://www.tbsnews.net/bangladesh/health/covid-19-sample-collection-booth-opens-dhaka-reporters-unity-80194</a>                             | <b>Covid-19 sample collection booth opens at Dhaka Reporters Unity</b>                        |
| 11/05/2020              | <a href="https://www.tbsnews.net/coronavirus-chronicle/covid-19-bangladesh/narayanganj-people-shopping-spree-amid-spike-covid-19">https://www.tbsnews.net/coronavirus-chronicle/covid-19-bangladesh/narayanganj-people-shopping-spree-amid-spike-covid-19</a>       | <b>Narayanganj people on shopping spree amid spike in Covid-19 cases</b>                      |
| 11/05/2020              | <a href="https://www.tbsnews.net/bangladesh/education/uiu-cblu-conducts-online-fdp-80101">https://www.tbsnews.net/bangladesh/education/uiu-cblu-conducts-online-fdp-80101</a>                                                                                       | <b>UIU, CBLU conducts Online FDP</b>                                                          |
| 11/05/2020              | <a href="https://www.tbsnews.net/coronavirus-chronicle/covid-19-bangladesh/unilever-red-crescent-join-hands-combat-covid-19-across">https://www.tbsnews.net/coronavirus-chronicle/covid-19-bangladesh/unilever-red-crescent-join-hands-combat-covid-19-across</a>   | <b>Unilever, Red Crescent join hands to combat Covid-19 across country</b>                    |
| 11/05/2020              | <a href="https://www.tbsnews.net/coronavirus-chronicle/covid-19-bangladesh/gonoshasthaya-seeks-temporary-approval-its-covid-19-test">https://www.tbsnews.net/coronavirus-chronicle/covid-19-bangladesh/gonoshasthaya-seeks-temporary-approval-its-covid-19-test</a> | <b>Gonoshasthaya seeks interim approval for Covid-19 testing kits</b>                         |



| <b>Date of the news</b> | <b>News URL</b>                                                                                                                                                                                                                                                         | <b>Title of the news</b>                                                                    |
|-------------------------|-------------------------------------------------------------------------------------------------------------------------------------------------------------------------------------------------------------------------------------------------------------------------|---------------------------------------------------------------------------------------------|
| 11/05/2020              | <a href="https://www.tbsnews.net/coronavirus-chronicle/covid-19-bangladesh/state-minister-foreign-affairs-donates-ventilators-n95">https://www.tbsnews.net/coronavirus-chronicle/covid-19-bangladesh/state-minister-foreign-affairs-donates-ventilators-n95</a>         | <b>State minister for foreign affairs donates ventilators, N95 masks to police hospital</b> |
| 12/05/2020              | <a href="https://www.tbsnews.net/coronavirus-chronicle/covid-19-bangladesh/pran-rfl-donates-covid-19-sample-collection-booths-4">https://www.tbsnews.net/coronavirus-chronicle/covid-19-bangladesh/pran-rfl-donates-covid-19-sample-collection-booths-4</a>             | <b>Pran-Rfl donates Covid-19 sample collection booths to 4 hospitals</b>                    |
| 12/05/2020              | <a href="https://www.tbsnews.net/coronavirus-chronicle/covid-19-bangladesh/covid-19-hospitals-still-running-low-oxygen-80659">https://www.tbsnews.net/coronavirus-chronicle/covid-19-bangladesh/covid-19-hospitals-still-running-low-oxygen-80659</a>                   | <b>Covid-19 hospitals still running low on oxygen</b>                                       |
| 12/05/2020              | <a href="https://www.tbsnews.net/coronavirus-chronicle/covid-19-bangladesh/gonoshasthaya-set-submit-its-kit-bsmmu-wednesday-80647">https://www.tbsnews.net/coronavirus-chronicle/covid-19-bangladesh/gonoshasthaya-set-submit-its-kit-bsmmu-wednesday-80647</a>         | <b>Gonoshasthaya set to submit its kit to BSMMU on Wednesday</b>                            |
| 12/05/2020              | <a href="https://www.tbsnews.net/coronavirus-chronicle/covid-19-bangladesh/brac-assisting-dghs-install-50-kiosks-covid-19-sample">https://www.tbsnews.net/coronavirus-chronicle/covid-19-bangladesh/brac-assisting-dghs-install-50-kiosks-covid-19-sample</a>           | <b>BRAC teams up with DGHS to install Covid-19 test kiosks in Dhaka</b>                     |
| 12/05/2020              | <a href="https://www.tbsnews.net/coronavirus-chronicle/covid-19-bangladesh/foodpanda-introduces-insurance-its-riders-80563">https://www.tbsnews.net/coronavirus-chronicle/covid-19-bangladesh/foodpanda-introduces-insurance-its-riders-80563</a>                       | <b>Foodpanda introduces insurance for its riders</b>                                        |
| 12/05/2020              | <a href="https://www.tbsnews.net/coronavirus-chronicle/covid-19-bangladesh/abul-khair-group-provides-oxygen-covid-19-treatment-80479">https://www.tbsnews.net/coronavirus-chronicle/covid-19-bangladesh/abul-khair-group-provides-oxygen-covid-19-treatment-80479</a>   | <b>Abul Khair Group provides oxygen for Covid-19 treatment</b>                              |
| 12/05/2020              | <a href="https://www.tbsnews.net/feature/panorama/covid-19-impact-low-income-communities-stare-grim-reality-80410">https://www.tbsnews.net/feature/panorama/covid-19-impact-low-income-communities-stare-grim-reality-80410</a>                                         | <b>Covid-19 impact: Low-income communities stare at grim reality</b>                        |
| 13/05/2020              | <a href="https://www.tbsnews.net/economy/banking/brac-bank-waives-penal-fees-dps-81145">https://www.tbsnews.net/economy/banking/brac-bank-waives-penal-fees-dps-81145</a>                                                                                               | <b>Brac Bank waives penal fees on DPS</b>                                                   |
| 13/05/2020              | <a href="https://www.tbsnews.net/coronavirus-chronicle/covid-19-bangladesh/bsrm-carries-out-csr-initiatives-amid-covid-19-crisis">https://www.tbsnews.net/coronavirus-chronicle/covid-19-bangladesh/bsrm-carries-out-csr-initiatives-amid-covid-19-crisis</a>           | <b>BSRM carries out CSR initiatives amid Covid-19 crisis</b>                                |
| 13/05/2020              | <a href="https://www.tbsnews.net/bangladesh/health/shohoz-now-comes-digital-healthcare-solution-81136">https://www.tbsnews.net/bangladesh/health/shohoz-now-comes-digital-healthcare-solution-81136</a>                                                                 | <b>Shohoz now comes up with digital healthcare solution</b>                                 |
| 13/05/2020              | <a href="https://www.tbsnews.net/coronavirus-chronicle/covid-19-bangladesh/two-narayanganj-markets-shut-they-failed-follow-health">https://www.tbsnews.net/coronavirus-chronicle/covid-19-bangladesh/two-narayanganj-markets-shut-they-failed-follow-health</a>         | <b>Two Narayanganj markets shut as they failed to follow health rules</b>                   |
| 13/05/2020              | <a href="https://www.tbsnews.net/coronavirus-chronicle/covid-19-bangladesh/markets-shopping-malls-shut-down-tangail-defying-health">https://www.tbsnews.net/coronavirus-chronicle/covid-19-bangladesh/markets-shopping-malls-shut-down-tangail-defying-health</a>       | <b>Markets, shopping malls shut down in Tangail for defying health guidelines</b>           |
| 13/05/2020              | <a href="https://www.tbsnews.net/companies/walton-makes-medicart-robot-covid-19-patients-81115">https://www.tbsnews.net/companies/walton-makes-medicart-robot-covid-19-patients-81115</a>                                                                               | <b>Walton makes Medicart robot for Covid-19 patients</b>                                    |
| 13/05/2020              | <a href="https://www.tbsnews.net/coronavirus-chronicle/covid-19-bangladesh/grameen-telecom-provides-masks-and-ppes-police-army-and">https://www.tbsnews.net/coronavirus-chronicle/covid-19-bangladesh/grameen-telecom-provides-masks-and-ppes-police-army-and</a>       | <b>Grameen Telecom provides masks and PPEs to the Police, Army and RAB</b>                  |
| 13/05/2020              | <a href="https://www.tbsnews.net/coronavirus-chronicle/covid-19-bangladesh/singer-provides-home-appliances-bangladesh-police">https://www.tbsnews.net/coronavirus-chronicle/covid-19-bangladesh/singer-provides-home-appliances-bangladesh-police</a>                   | <b>Singer provides home appliances for Bangladesh Police Hospitals</b>                      |
| 13/05/2020              | <a href="https://www.tbsnews.net/coronavirus-chronicle/covid-19-bangladesh/bsrm-group-supports-helpless-amid-covid-19-80974">https://www.tbsnews.net/coronavirus-chronicle/covid-19-bangladesh/bsrm-group-supports-helpless-amid-covid-19-80974</a>                     | <b>BSRM group supports helpless amid Covid-19</b>                                           |
| 13/05/2020              | <a href="https://www.tbsnews.net/coronavirus-chronicle/covid-19-bangladesh/gonoshasthaya-submits-200-covid-19-testing-kits-bsmmu">https://www.tbsnews.net/coronavirus-chronicle/covid-19-bangladesh/gonoshasthaya-submits-200-covid-19-testing-kits-bsmmu</a>           | <b>Gonoshasthaya Kendra hands over Covid-19 test kits to BSMMU</b>                          |
| 13/05/2020              | <a href="https://www.tbsnews.net/companies/metlife-bangladesh-launches-covid-19-support-programme-customers-80899">https://www.tbsnews.net/companies/metlife-bangladesh-launches-covid-19-support-programme-customers-80899</a>                                         | <b>MetLife Bangladesh launches Covid-19 support programme for customers</b>                 |
| 14/05/2020              | <a href="https://www.tbsnews.net/coronavirus-chronicle/covid-19-bangladesh/zaber-and-zubair-develops-coronavirus-killing-fabric-81532">https://www.tbsnews.net/coronavirus-chronicle/covid-19-bangladesh/zaber-and-zubair-develops-coronavirus-killing-fabric-81532</a> | <b>Zaber and Zubair develops 'coronavirus killing fabric'</b>                               |

| <b>Date of the news</b> | <b>News URL</b>                                                                                                                                                                                                                                                         | <b>Title of the news</b>                                                                 |
|-------------------------|-------------------------------------------------------------------------------------------------------------------------------------------------------------------------------------------------------------------------------------------------------------------------|------------------------------------------------------------------------------------------|
| 14/05/2020              | <a href="https://www.tbsnews.net/coronavirus-chronicle/covid-19-bangladesh/old-faujians-lends-hand-covid-19-victims-81478">https://www.tbsnews.net/coronavirus-chronicle/covid-19-bangladesh/old-faujians-lends-hand-covid-19-victims-81478</a>                         | <b>Old Faujians lends a hand to Covid-19 victims</b>                                     |
| 14/05/2020              | <a href="https://www.tbsnews.net/coronavirus-chronicle/covid-19-bangladesh/swedish-clothing-company-hm-donates-8-ventilators-and-1500">https://www.tbsnews.net/coronavirus-chronicle/covid-19-bangladesh/swedish-clothing-company-hm-donates-8-ventilators-and-1500</a> | <b>Swedish clothing company H&amp;M donates 8 ventilators and 1500 PPE to Bangladesh</b> |
| 14/05/2020              | <a href="https://www.tbsnews.net/coronavirus-chronicle/covid-19-bangladesh/robi-brings-33gb-data-free-doctors-6-months-81277">https://www.tbsnews.net/coronavirus-chronicle/covid-19-bangladesh/robi-brings-33gb-data-free-doctors-6-months-81277</a>                   | <b>Robi brings 33GB data for free to doctors for 6 months</b>                            |
| 14/05/2020              | <a href="https://www.tbsnews.net/coronavirus-chronicle/covid-19-bangladesh/unicef-welcomes-release-children-detention-81349">https://www.tbsnews.net/coronavirus-chronicle/covid-19-bangladesh/unicef-welcomes-release-children-detention-81349</a>                     | <b>Unicef welcomes release of children from detention</b>                                |
| 15/05/2020              | <a href="https://www.tbsnews.net/coronavirus-chronicle/covid-19-bangladesh/field-hospital-brings-relief-ctg-covid-19-patients-81766">https://www.tbsnews.net/coronavirus-chronicle/covid-19-bangladesh/field-hospital-brings-relief-ctg-covid-19-patients-81766</a>     | <b>Field hospital brings relief to Ctg Covid-19 patients</b>                             |
| 16/05/2020              | <a href="https://www.tbsnews.net/coronavirus-chronicle/covid-19-bangladesh/grameen-telecom-provides-healthcare-equipment-hospitals">https://www.tbsnews.net/coronavirus-chronicle/covid-19-bangladesh/grameen-telecom-provides-healthcare-equipment-hospitals</a>       | <b>Grameen Telecom provides healthcare equipment to hospitals</b>                        |
| 16/05/2020              | <a href="https://www.tbsnews.net/coronavirus-chronicle/covid-19-bangladesh/health-minister-inaugurates-dedicated-covid-19-hospital">https://www.tbsnews.net/coronavirus-chronicle/covid-19-bangladesh/health-minister-inaugurates-dedicated-covid-19-hospital</a>       | <b>Health minister inaugurates dedicated Covid-19 hospital building</b>                  |
| 16/05/2020              | <a href="https://www.tbsnews.net/coronavirus-chronicle/covid-19-bangladesh/jatri-gives-dhaka-chaka-green-dhaka-staff-eid-gifts-82126">https://www.tbsnews.net/coronavirus-chronicle/covid-19-bangladesh/jatri-gives-dhaka-chaka-green-dhaka-staff-eid-gifts-82126</a>   | <b>Jatri gives Dhaka Chaka, Green Dhaka staff Eid gifts</b>                              |
| 16/05/2020              | <a href="https://www.tbsnews.net/economy/banking/beneficiaries-getting-pms-cash-aid-easily-through-bkash-amid-pandemic-81916">https://www.tbsnews.net/economy/banking/beneficiaries-getting-pms-cash-aid-easily-through-bkash-amid-pandemic-81916</a>                   | <b>Beneficiaries getting PM's cash aid easily through bKash amid pandemic</b>            |
| 17/05/2020              | <a href="https://www.tbsnews.net/companies/shwapno-recruits-300-staff-amid-covid-19-pandemic-82468">https://www.tbsnews.net/companies/shwapno-recruits-300-staff-amid-covid-19-pandemic-82468</a>                                                                       | <b>Shwapno recruits 300 staff amid Covid-19 pandemic</b>                                 |
| 17/05/2020              | <a href="https://www.tbsnews.net/coronavirus-chronicle/covid-19-bangladesh/praava-health-starts-testing-covid-19-82372">https://www.tbsnews.net/coronavirus-chronicle/covid-19-bangladesh/praava-health-starts-testing-covid-19-82372</a>                               | <b>Praava Health starts testing for Covid-19</b>                                         |
| 18/05/2020              | <a href="https://www.tbsnews.net/economy/banking/standard-chartered-encourages-clients-join-fight-against-coronavirus-82882">https://www.tbsnews.net/economy/banking/standard-chartered-encourages-clients-join-fight-against-coronavirus-82882</a>                     | <b>Standard Chartered encourages clients to join fight against coronavirus</b>           |
| 18/05/2020              | <a href="https://www.tbsnews.net/coronavirus-chronicle/covid-19-bangladesh/bkash-provides-food-5000-virus-hit-families-82870">https://www.tbsnews.net/coronavirus-chronicle/covid-19-bangladesh/bkash-provides-food-5000-virus-hit-families-82870</a>                   | <b>bKash provides food for 5,000 virus-hit families</b>                                  |
| 18/05/2020              | <a href="https://www.tbsnews.net/sports/mashrafes-bracelet-bought-whopping-42-lakhs-then-gifted-back-him-82510">https://www.tbsnews.net/sports/mashrafes-bracelet-bought-whopping-42-lakhs-then-gifted-back-him-82510</a>                                               | <b>Mashrafe's bracelet bought for whopping 42 lakhs, then gifted back to him</b>         |
| 19/05/2020              | <a href="https://www.tbsnews.net/bangladesh/hsbc-launches-joy-giving-bring-smiles-100000-faces-83344">https://www.tbsnews.net/bangladesh/hsbc-launches-joy-giving-bring-smiles-100000-faces-83344</a>                                                                   | <b>HSBC launches 'Joy of Giving' to bring smiles to 100,000 faces</b>                    |
| 19/05/2020              | <a href="https://www.tbsnews.net/coronavirus-chronicle/covid-19-bangladesh/dhpb-scouts-brac-work-jointly-fight-covid-19-83329">https://www.tbsnews.net/coronavirus-chronicle/covid-19-bangladesh/dhpb-scouts-brac-work-jointly-fight-covid-19-83329</a>                 | <b>DHPB, Scouts, Brac to work jointly to fight Covid-19</b>                              |
| 19/05/2020              | <a href="https://www.tbsnews.net/coronavirus-chronicle/covid-19-bangladesh/ficci-donates-11000-ppe-dghs-83317">https://www.tbsnews.net/coronavirus-chronicle/covid-19-bangladesh/ficci-donates-11000-ppe-dghs-83317</a>                                                 | <b>FICCI donates 11,000 PPE to DGHS</b>                                                  |
| 19/05/2020              | <a href="https://www.tbsnews.net/economy/fbccci-help-smes-availing-special-loans-stimulus-package-83293">https://www.tbsnews.net/economy/fbccci-help-smes-availing-special-loans-stimulus-package-83293</a>                                                             | <b>FBCCI to help SMEs availing special loans from stimulus package</b>                   |
| 19/05/2020              | <a href="https://www.tbsnews.net/coronavirus-chronicle/covid-19-bangladesh/jti-continues-supporting-pandemic-hit-people-83272">https://www.tbsnews.net/coronavirus-chronicle/covid-19-bangladesh/jti-continues-supporting-pandemic-hit-people-83272</a>                 | <b>JTI continues supporting pandemic-hit people</b>                                      |
| 19/05/2020              | <a href="https://www.tbsnews.net/economy/resurgent-bangladesh-launched-help-private-sector-recover-83245">https://www.tbsnews.net/economy/resurgent-bangladesh-launched-help-private-sector-recover-83245</a>                                                           | <b>'Resurgent Bangladesh' launched to help private sector recover</b>                    |

| <b>Date of the news</b> | <b>News URL</b>                                                                                                                                                                                                                                                         | <b>Title of the news</b>                                                                   |
|-------------------------|-------------------------------------------------------------------------------------------------------------------------------------------------------------------------------------------------------------------------------------------------------------------------|--------------------------------------------------------------------------------------------|
| 20/05/2020              | <a href="https://www.tbsnews.net/coronavirus-chronicle/covid-19-bangladesh/priyoshop-one-stop-shopping-point-fight-covid-19-83818">https://www.tbsnews.net/coronavirus-chronicle/covid-19-bangladesh/priyoshop-one-stop-shopping-point-fight-covid-19-83818</a>         | <b>PriyoShop, a one-stop-shopping point, to fight Covid-19</b>                             |
| 20/05/2020              | <a href="https://www.tbsnews.net/panorama/feeding-people-hiding-shadows-83428">https://www.tbsnews.net/panorama/feeding-people-hiding-shadows-83428</a>                                                                                                                 | <b>Feeding the people hiding in the shadows</b>                                            |
| 21/05/2020              | <a href="https://www.tbsnews.net/coronavirus-chronicle/covid-19-bangladesh/beximco-pharma-introduces-worlds-first-generic-remdesivir">https://www.tbsnews.net/coronavirus-chronicle/covid-19-bangladesh/beximco-pharma-introduces-worlds-first-generic-remdesivir</a>   | <b>Beximco Pharma introduces world's first generic remdesivir for Covid-19 treatment</b>   |
| 21/05/2020              | <a href="https://www.tbsnews.net/bangladesh/health/ctg-private-hospital-employees-hold-protests-arrears-eid-bonus-84220">https://www.tbsnews.net/bangladesh/health/ctg-private-hospital-employees-hold-protests-arrears-eid-bonus-84220</a>                             | <b>Ctg private hospital employees hold protests for arrears, Eid bonus</b>                 |
| 21/05/2020              | <a href="https://www.tbsnews.net/coronavirus-chronicle/covid-19-bangladesh/coca-cola-and-care-bangladesh-support-over-50000-people">https://www.tbsnews.net/coronavirus-chronicle/covid-19-bangladesh/coca-cola-and-care-bangladesh-support-over-50000-people</a>       | <b>Coca-Cola and CARE Bangladesh support over 50,000 people with a month's food ration</b> |
| 22/05/2020              | <a href="https://www.tbsnews.net/economy/rmg/bangladesh-threatens-blacklist-non-paying-british-brands-84559">https://www.tbsnews.net/economy/rmg/bangladesh-threatens-blacklist-non-paying-british-brands-84559</a>                                                     | <b>Bangladesh threatens to blacklist non-paying British brands</b>                         |
| 23/05/2020              | <a href="https://www.tbsnews.net/coronavirus-chronicle/covid-19-bangladesh/covid-19-test-gonoshasthaya-kit-begins-may-26-84904">https://www.tbsnews.net/coronavirus-chronicle/covid-19-bangladesh/covid-19-test-gonoshasthaya-kit-begins-may-26-84904</a>               | <b>Covid-19 test with Gonoshasthaya kit begins May 26</b>                                  |
| 23/05/2020              | <a href="https://www.tbsnews.net/bangladesh/radisson-blu-distributes-iftar-box-among-healthcare-officials-kurmitola-hospital-84766">https://www.tbsnews.net/bangladesh/radisson-blu-distributes-iftar-box-among-healthcare-officials-kurmitola-hospital-84766</a>       | <b>Radisson Blu distributes iftar box among healthcare officials at Kurmitola Hospital</b> |
| 23/05/2020              | <a href="https://www.tbsnews.net/coronavirus-chronicle/covid-19-bangladesh/evaly-donates-health-care-products-999-84649">https://www.tbsnews.net/coronavirus-chronicle/covid-19-bangladesh/evaly-donates-health-care-products-999-84649</a>                             | <b>Evaly donates health care products for 999</b>                                          |
| 24/05/2020              | <a href="https://www.tbsnews.net/coronavirus-chronicle/covid-19-bangladesh/navana-donates-medical-equipment-covid-19-frontline">https://www.tbsnews.net/coronavirus-chronicle/covid-19-bangladesh/navana-donates-medical-equipment-covid-19-frontline</a>               | <b>Navana donates medical equipment to Covid-19 frontline workers</b>                      |
| 24/05/2020              | <a href="https://www.tbsnews.net/bangladesh/health/eskayef-starts-distributing-remdesivir-hospitals-coronavirus-treatment-85132">https://www.tbsnews.net/bangladesh/health/eskayef-starts-distributing-remdesivir-hospitals-coronavirus-treatment-85132</a>             | <b>Eskayef starts distributing Remdesivir to hospitals for coronavirus treatment</b>       |
| 24/05/2020              | <a href="https://www.tbsnews.net/coronavirus-chronicle/covid-19-bangladesh/cultural-activists-sylhet-providing-food-love-people-85048">https://www.tbsnews.net/coronavirus-chronicle/covid-19-bangladesh/cultural-activists-sylhet-providing-food-love-people-85048</a> | <b>Cultural activists of Sylhet providing 'food of love' to people</b>                     |
| 25/05/2020              | <a href="https://www.tbsnews.net/companies/novoir-celebrates-eid-ul-fitr-distressed-people-85336">https://www.tbsnews.net/companies/novoir-celebrates-eid-ul-fitr-distressed-people-85336</a>                                                                           | <b>Novoir celebrates Eid- Ul-Fitr with distressed people</b>                               |
| 25/05/2020              | <a href="https://www.tbsnews.net/coronavirus-chronicle/covid-19-bangladesh/gonoshasthaya-postpones-covid-19-test-its-kit-85384">https://www.tbsnews.net/coronavirus-chronicle/covid-19-bangladesh/gonoshasthaya-postpones-covid-19-test-its-kit-85384</a>               | <b>Gonoshasthaya postpones Covid-19 test with its kit on drug admin's order</b>            |
| 25/05/2020              | <a href="https://www.tbsnews.net/bangladesh/manobotar-eid-utshob-85360">https://www.tbsnews.net/bangladesh/manobotar-eid-utshob-85360</a>                                                                                                                               | <b>'Manobotar Eid Utshob'</b>                                                              |
| 26/05/2020              | <a href="https://www.tbsnews.net/bangladesh/health/all-50-bed-hospitals-must-provide-treatment-covid-non-covid-patients-85636">https://www.tbsnews.net/bangladesh/health/all-50-bed-hospitals-must-provide-treatment-covid-non-covid-patients-85636</a>                 | <b>All 50-bed hospitals must provide treatment to Covid, non-Covid patients</b>            |
| 26/05/2020              | <a href="https://www.tbsnews.net/coronavirus-chronicle/covid-19-bangladesh/2-chattogram-hospitals-dedicated-treat-covid-19-patients">https://www.tbsnews.net/coronavirus-chronicle/covid-19-bangladesh/2-chattogram-hospitals-dedicated-treat-covid-19-patients</a>     | <b>2 Chattogram hospitals dedicated to treat Covid-19 patients</b>                         |
| 27/05/2020              | <a href="https://www.tbsnews.net/economy/banking/prab-makes-coronavirus-awareness-video-alo-asbei-85897">https://www.tbsnews.net/economy/banking/prab-makes-coronavirus-awareness-video-alo-asbei-85897</a>                                                             | <b>PRAB makes coronavirus awareness video "Alo asbei"</b>                                  |
| 28/05/2020              | <a href="https://www.tbsnews.net/coronavirus-chronicle/covid-19-bangladesh/novartis-donates-safety-gears-combat-coronavirus-86251">https://www.tbsnews.net/coronavirus-chronicle/covid-19-bangladesh/novartis-donates-safety-gears-combat-coronavirus-86251</a>         | <b>Novartis donates safety gears to combat coronavirus</b>                                 |

| <b>Date of the news</b> | <b>News URL</b>                                                                                                                                                                                                                                                         | <b>Title of the news</b>                                                                      |
|-------------------------|-------------------------------------------------------------------------------------------------------------------------------------------------------------------------------------------------------------------------------------------------------------------------|-----------------------------------------------------------------------------------------------|
| 28/05/2020              | <a href="https://www.tbsnews.net/coronavirus-chronicle/covid-19-bangladesh/citi-foundation-donate-tk85-lakh-materialise-relief">https://www.tbsnews.net/coronavirus-chronicle/covid-19-bangladesh/citi-foundation-donate-tk85-lakh-materialise-relief</a>               | <b>Citi Foundation to donate Tk85 lakh to materialise relief programmes</b>                   |
| 28/05/2020              | <a href="https://www.tbsnews.net/coronavirus-chronicle/covid-19-bangladesh/us-embassy-provides-covid-19-response-equipment-kamalapur">https://www.tbsnews.net/coronavirus-chronicle/covid-19-bangladesh/us-embassy-provides-covid-19-response-equipment-kamalapur</a>   | <b>US Embassy provides Covid-19 response equipment to Kamalapur Railway General Hospital</b>  |
| 30/05/2020              | <a href="https://www.tbsnews.net/coronavirus-chronicle/covid-19-bangladesh/bangladeshi-scientists-complete-genome-sequencing-novel">https://www.tbsnews.net/coronavirus-chronicle/covid-19-bangladesh/bangladeshi-scientists-complete-genome-sequencing-novel</a>       | <b>Bangladeshi scientists complete genome sequencing of novel coronavirus</b>                 |
| 30/05/2020              | <a href="https://www.tbsnews.net/bangladesh/road-transport/combating-covid-19-uber-forms-transport-safety-alliance-86794">https://www.tbsnews.net/bangladesh/road-transport/combating-covid-19-uber-forms-transport-safety-alliance-86794</a>                           | <b>Combating Covid-19: Uber forms transport safety alliance</b>                               |
| 30/05/2020              | <a href="https://www.tbsnews.net/coronavirus-chronicle/covid-19-bangladesh/health-ministry-issues-revised-health-guidelines">https://www.tbsnews.net/coronavirus-chronicle/covid-19-bangladesh/health-ministry-issues-revised-health-guidelines</a>                     | <b>Health ministry issues revised health guidelines for workplaces</b>                        |
| 30/05/2020              | <a href="https://www.tbsnews.net/bangladesh/education/brac-university-establishes-student-assistance-fund-86710">https://www.tbsnews.net/bangladesh/education/brac-university-establishes-student-assistance-fund-86710</a>                                             | <b>Brac University establishes student assistance fund</b>                                    |
| 30/05/2020              | <a href="https://www.tbsnews.net/economy/adb-provides-grant-bangladesh-boosting-urban-primary-healthcare-facilities-86692">https://www.tbsnews.net/economy/adb-provides-grant-bangladesh-boosting-urban-primary-healthcare-facilities-86692</a>                         | <b>ADB provides grant to boost urban primary healthcare facilities</b>                        |
| 01/06/2020              | <a href="https://www.tbsnews.net/thoughts/small-businesses-need-to-take-careful-steps-order-survive-pandemic-87271">https://www.tbsnews.net/thoughts/small-businesses-need-to-take-careful-steps-order-survive-pandemic-87271</a>                                       | <b>Small businesses need to take careful steps in order to survive the pandemic</b>           |
| 01/06/2020              | <a href="https://www.tbsnews.net/feature/panorama/hard-times-pandemic-hit-landless-poor-87511">https://www.tbsnews.net/feature/panorama/hard-times-pandemic-hit-landless-poor-87511</a>                                                                                 | <b>Hard times for the pandemic-hit landless poor</b>                                          |
| 01/06/2020              | <a href="https://www.tbsnews.net/coronavirus-chronicle/covid-19-bangladesh/star-rated-coxs-bazar-hotel-turn-isolation-centre-87517">https://www.tbsnews.net/coronavirus-chronicle/covid-19-bangladesh/star-rated-coxs-bazar-hotel-turn-isolation-centre-87517</a>       | <b>Star-rated Cox's Bazar hotel to turn into isolation centre</b>                             |
| 01/06/2020              | <a href="https://www.tbsnews.net/economy/reopening-restaurants-still-uncertain-87553">https://www.tbsnews.net/economy/reopening-restaurants-still-uncertain-87553</a>                                                                                                   | <b>Reopening of restaurants still uncertain</b>                                               |
| 02/06/2020              | <a href="https://www.tbsnews.net/coronavirus-chronicle/covid-19-bangladesh/maintain-health-directives-social-distancing-while">https://www.tbsnews.net/coronavirus-chronicle/covid-19-bangladesh/maintain-health-directives-social-distancing-while</a>                 | <b>Maintain health directives, social distancing while operating public transport: Quader</b> |
| 02/06/2020              | <a href="https://www.tbsnews.net/coronavirus-chronicle/covid-19-bangladesh/abb-starts-collecting-data-covid-19-affected-bankers-87835">https://www.tbsnews.net/coronavirus-chronicle/covid-19-bangladesh/abb-starts-collecting-data-covid-19-affected-bankers-87835</a> | <b>ABB starts collecting data on Covid-19-affected bankers</b>                                |
| 02/06/2020              | <a href="https://www.tbsnews.net/companies/prime-bank-prioritise-health-safety-post-shutdown-operations-87964">https://www.tbsnews.net/companies/prime-bank-prioritise-health-safety-post-shutdown-operations-87964</a>                                                 | <b>Prime Bank to prioritise health safety in post shutdown operations</b>                     |
| 02/06/2020              | <a href="https://www.tbsnews.net/coronavirus-chronicle/covid-19-bangladesh/s-alam-group-donates-medical-equipment-3-ctg-hospitals">https://www.tbsnews.net/coronavirus-chronicle/covid-19-bangladesh/s-alam-group-donates-medical-equipment-3-ctg-hospitals</a>         | <b>S Alam Group donates medical equipment to 3 Ctg hospitals</b>                              |
| 03/06/2020              | <a href="https://www.tbsnews.net/coronavirus-chronicle/covid-19-bangladesh/stanchart-now-lends-hand-covid-19-patients-88378">https://www.tbsnews.net/coronavirus-chronicle/covid-19-bangladesh/stanchart-now-lends-hand-covid-19-patients-88378</a>                     | <b>StanChart now lends a hand to Covid-19 patients</b>                                        |
| 03/06/2020              | <a href="https://www.tbsnews.net/coronavirus-chronicle/covid-19-bangladesh/one-million-non-medical-masks-distributed-grameen-telecom">https://www.tbsnews.net/coronavirus-chronicle/covid-19-bangladesh/one-million-non-medical-masks-distributed-grameen-telecom</a>   | <b>One million non-medical masks distributed by Grameen Telecom</b>                           |



| <b>Date of the news</b> | <b>News URL</b>                                                                                                                                                                                                                                                         | <b>Title of the news</b>                                                                  |
|-------------------------|-------------------------------------------------------------------------------------------------------------------------------------------------------------------------------------------------------------------------------------------------------------------------|-------------------------------------------------------------------------------------------|
| 04/06/2020              | <a href="https://www.tbsnews.net/coronavirus-chronicle/covid-19-bangladesh/govt-prepares-hospital-treat-covid-19-positive-officials">https://www.tbsnews.net/coronavirus-chronicle/covid-19-bangladesh/govt-prepares-hospital-treat-covid-19-positive-officials</a>     | <b>Govt prepares hospital to treat Covid-19 positive officials</b>                        |
| 04/06/2020              | <a href="https://www.tbsnews.net/coronavirus-chronicle/covid-19-bangladesh/bgmeas-first-covid-19-test-lab-launched-88900">https://www.tbsnews.net/coronavirus-chronicle/covid-19-bangladesh/bgmeas-first-covid-19-test-lab-launched-88900</a>                           | <b>BGMEA's first Covid-19 testing lab launched</b>                                        |
| 04/06/2020              | <a href="https://www.tbsnews.net/coronavirus-chronicle/covid-19-bangladesh/doctors-associations-launch-telemedicine-service-covid-19">https://www.tbsnews.net/coronavirus-chronicle/covid-19-bangladesh/doctors-associations-launch-telemedicine-service-covid-19</a>   | <b>Doctors' associations launch telemedicine service for Covid-19 patients</b>            |
| 05/06/2020              | <a href="https://www.tbsnews.net/analysis/public-expenditure-and-deficit-financing-covid-19-era-89239">https://www.tbsnews.net/analysis/public-expenditure-and-deficit-financing-covid-19-era-89239</a>                                                                 | <b>Public Expenditure and deficit financing in the Covid-19 era</b>                       |
| 06/06/2020              | <a href="https://www.tbsnews.net/coronavirus-chronicle/covid-19-bangladesh/bb-moves-work-home-following-health-rules-89623">https://www.tbsnews.net/coronavirus-chronicle/covid-19-bangladesh/bb-moves-work-home-following-health-rules-89623</a>                       | <b>BB moves to work from home following health rules</b>                                  |
| 07/06/2020              | <a href="https://www.tbsnews.net/companies/pharma/beximco-supplies-generic-remdesivir-drugs-nigeria-89971">https://www.tbsnews.net/companies/pharma/beximco-supplies-generic-remdesivir-drugs-nigeria-89971</a>                                                         | <b>Beximco supplies generic Remdesivir drugs to Nigeria</b>                               |
| 07/06/2020              | <a href="https://www.tbsnews.net/coronavirus-chronicle/covid-19-bangladesh/du-tests-coronavirus-samples-40-minutes-using-rt-lamp-kit">https://www.tbsnews.net/coronavirus-chronicle/covid-19-bangladesh/du-tests-coronavirus-samples-40-minutes-using-rt-lamp-kit</a>   | <b>DU tests coronavirus samples in 30 minutes using RT-LAMP kit</b>                       |
| 08/06/2020              | <a href="https://www.tbsnews.net/bangladesh/health/health-ministry-recruit-3000-new-people-including-1200-medical-technologists-90499">https://www.tbsnews.net/bangladesh/health/health-ministry-recruit-3000-new-people-including-1200-medical-technologists-90499</a> | <b>Health Ministry to recruit 3,000 new people including 1,200 medical technologists</b>  |
| 09/06/2020              | <a href="https://www.tbsnews.net/bangladesh/health/govt-import-oxygen-cylinders-hfnc-91054">https://www.tbsnews.net/bangladesh/health/govt-import-oxygen-cylinders-hfnc-91054</a>                                                                                       | <b>Govt to import oxygen cylinders, HFNC</b>                                              |
| 09/06/2020              | <a href="https://www.tbsnews.net/bangladesh/crime/2-chattogram-traders-fined-tk430-lakh-selling-oxygen-cylinders-high-prices-91021">https://www.tbsnews.net/bangladesh/crime/2-chattogram-traders-fined-tk430-lakh-selling-oxygen-cylinders-high-prices-91021</a>       | <b>2 Chattogram traders fined Tk4.30 lakh for selling oxygen cylinders at high prices</b> |
| 09/06/2020              | <a href="https://www.tbsnews.net/economy/industry/govt-approves-health-safety-guidelines-factories-establishments-91015">https://www.tbsnews.net/economy/industry/govt-approves-health-safety-guidelines-factories-establishments-91015</a>                             | <b>Govt approves health safety guidelines for factories, establishments</b>               |
| 10/06/2020              | <a href="https://www.tbsnews.net/economy/banking/covid-19-sibl-urges-clients-use-mobile-app-safer-banking-91552">https://www.tbsnews.net/economy/banking/covid-19-sibl-urges-clients-use-mobile-app-safer-banking-91552</a>                                             | <b>Covid-19: SIBL urges clients to use mobile app for safer banking</b>                   |
| 11/06/2020              |                                                                                                                                                                                                                                                                         |                                                                                           |
| 12/06/2020              | <a href="https://www.tbsnews.net/coronavirus-chronicle/covid-19-bangladesh/rohingya-cyclists-share-covid-19-info-door-door-92488">https://www.tbsnews.net/coronavirus-chronicle/covid-19-bangladesh/rohingya-cyclists-share-covid-19-info-door-door-92488</a>           | <b>Rohingya cyclists share Covid-19 info door-to-door</b>                                 |
| 13/06/2020              | <a href="https://www.tbsnews.net/bangladesh/districts/deputy-minister-nowfel-donates-tk3-lakh-temporary-hospital-workers-92827">https://www.tbsnews.net/bangladesh/districts/deputy-minister-nowfel-donates-tk3-lakh-temporary-hospital-workers-92827</a>               | <b>Deputy Minister Nowfel donates Tk3 lakh to temporary hospital workers</b>              |
| 13/06/2020              | <a href="https://www.tbsnews.net/coronavirus-chronicle/covid-19-bangladesh/26-hospitals-getting-centralised-oxygen-supply-combat">https://www.tbsnews.net/coronavirus-chronicle/covid-19-bangladesh/26-hospitals-getting-centralised-oxygen-supply-combat</a>           | <b>26 hospitals getting centralised oxygen supply to combat Covid-19</b>                  |

| <b>Date of the news</b> | <b>News URL</b>                                                                                                                                                                                                                                                           | <b>Title of the news</b>                                                                |
|-------------------------|---------------------------------------------------------------------------------------------------------------------------------------------------------------------------------------------------------------------------------------------------------------------------|-----------------------------------------------------------------------------------------|
| 14/06/2020              | <a href="https://www.tbsnews.net/coronavirus-chronicle/covid-19-bangladesh/just-190-new-ventilators-installed-despite-high-demand">https://www.tbsnews.net/coronavirus-chronicle/covid-19-bangladesh/just-190-new-ventilators-installed-despite-high-demand</a>           | <b>Just 190 new ventilators installed despite high demand</b>                           |
| 15/06/2020              | <a href="https://www.tbsnews.net/economy/trade/pandemics-gainer-mask-factories-work-overdrive-93712">https://www.tbsnews.net/economy/trade/pandemics-gainer-mask-factories-work-overdrive-93712</a>                                                                       | <b>Covid-19 unmask business potential for mask makers</b>                               |
| 16/06/2020              | <a href="https://www.tbsnews.net/coronavirus-chronicle/covid-19-bangladesh/saf-bma-jointly-launch-covid-19-sample-collection-booths">https://www.tbsnews.net/coronavirus-chronicle/covid-19-bangladesh/saf-bma-jointly-launch-covid-19-sample-collection-booths</a>       | <b>Covid-19 sample collection booth for doctors launched in Chattergram</b>             |
| 16/06/2020              | <a href="https://www.tbsnews.net/coronavirus-chronicle/covid-19-bangladesh/chattergram-city-corporation-fires-10-doctors-avoiding-duty">https://www.tbsnews.net/coronavirus-chronicle/covid-19-bangladesh/chattergram-city-corporation-fires-10-doctors-avoiding-duty</a> | <b>10 doctors fired for avoiding duty at isolation centre in Ctg</b>                    |
| 17/06/2020              | <a href="https://www.tbsnews.net/coronavirus-chronicle/covid-19-bangladesh/banks-ordered-ensure-csr-support-covid-19-treatment-94681">https://www.tbsnews.net/coronavirus-chronicle/covid-19-bangladesh/banks-ordered-ensure-csr-support-covid-19-treatment-94681</a>     | <b>Banks ordered to ensure CSR support for Covid-19 treatment</b>                       |
| 17/06/2020              | <a href="https://www.tbsnews.net/coronavirus-chronicle/covid-19-bangladesh/icddr-begins-clinical-trial-ivermectin-treat-patients">https://www.tbsnews.net/coronavirus-chronicle/covid-19-bangladesh/icddr-begins-clinical-trial-ivermectin-treat-patients</a>             | <b>Icddr,b begins clinical trial of Ivermectin to treat patients with Covid-19</b>      |
| 18/06/2020              | <a href="https://www.tbsnews.net/coronavirus-chronicle/covid-19-bangladesh/unilever-bangladesh-donates-critical-medical-equipment">https://www.tbsnews.net/coronavirus-chronicle/covid-19-bangladesh/unilever-bangladesh-donates-critical-medical-equipment</a>           | <b>Unilever Bangladesh donates critical medical equipment to fight against Covid-19</b> |
| 19/06/2020              | <a href="https://www.tbsnews.net/coronavirus-chronicle/covid-19-bangladesh/grameen-telecom-donates-ppe-volunteers-ambulance-service">https://www.tbsnews.net/coronavirus-chronicle/covid-19-bangladesh/grameen-telecom-donates-ppe-volunteers-ambulance-service</a>       | <b>Grameen Telecom donates PPE to volunteers, ambulance service providers</b>           |
| 19/06/2020              | <a href="https://www.tbsnews.net/coronavirus-chronicle/covid-19-bangladesh/tk-group-donates-20-ventilators-chattergram-hospitals-95560">https://www.tbsnews.net/coronavirus-chronicle/covid-19-bangladesh/tk-group-donates-20-ventilators-chattergram-hospitals-95560</a> | <b>TK Group donates 20 ventilators to Chattergram hospitals</b>                         |
| 19/06/2020              | <a href="https://www.tbsnews.net/coronavirus-chronicle/covid-19-bangladesh/covid-19-baf-aircraft-brings-medical-aid-s-korea-95542">https://www.tbsnews.net/coronavirus-chronicle/covid-19-bangladesh/covid-19-baf-aircraft-brings-medical-aid-s-korea-95542</a>           | <b>Covid-19: BAF aircraft brings medical aid from S Korea</b>                           |
| 19/06/2020              | <a href="https://www.tbsnews.net/rohingya-crisis/iom-organises-itc-visit-rohingyas-increase-awareness-covid-19-95467">https://www.tbsnews.net/rohingya-crisis/iom-organises-itc-visit-rohingyas-increase-awareness-covid-19-95467</a>                                     | <b>IOM organises ITC visit for Rohingyas to increase awareness of Covid-19</b>          |
| 19/06/2020              | <a href="https://www.tbsnews.net/companies/startups/ekhoni-youth-initiative-address-urgent-needs-amid-covid-19-crisis-95362">https://www.tbsnews.net/companies/startups/ekhoni-youth-initiative-address-urgent-needs-amid-covid-19-crisis-95362</a>                       | <b>Ekhoni: A youth initiative to address urgent needs amid Covid-19 crisis</b>          |
| 20/06/2020              | <a href="https://www.tbsnews.net/coronavirus-chronicle/covid-19-bangladesh/covid-19-impacts-95-households-income-world-vision-survey">https://www.tbsnews.net/coronavirus-chronicle/covid-19-bangladesh/covid-19-impacts-95-households-income-world-vision-survey</a>     | <b>Covid-19 impacts 95% households' income: World Vision survey</b>                     |
| 21/06/2020              | <a href="https://www.tbsnews.net/coronavirus-chronicle/covid-19-bangladesh/army-supervise-1000-bed-covid-19-isolation-centre-dncc">https://www.tbsnews.net/coronavirus-chronicle/covid-19-bangladesh/army-supervise-1000-bed-covid-19-isolation-centre-dncc</a>           | <b>Army to supervise 1,000-bed Covid-19 isolation centre at DNCC market</b>             |
| 22/06/2020              |                                                                                                                                                                                                                                                                           |                                                                                         |
| 23/06/2020              | <a href="https://www.tbsnews.net/economy/foreign-aid/jica-provide-tk79cr-medical-equipment-bangladesh-97273">https://www.tbsnews.net/economy/foreign-aid/jica-provide-tk79cr-medical-equipment-bangladesh-97273</a>                                                       | <b>Jica to provide Tk79cr medical equipment to Bangladesh</b>                           |
| 24/06/2020              | <a href="https://www.tbsnews.net/coronavirus-chronicle/covid-19-bangladesh/govt-forms-coordination-cell-prevent-covid-19-97648">https://www.tbsnews.net/coronavirus-chronicle/covid-19-bangladesh/govt-forms-coordination-cell-prevent-covid-19-97648</a>                 | <b>Govt forms coordination cell to prevent Covid-19</b>                                 |

| <b>Date of the news</b> | <b>News URL</b>                                                                                                                                                                                                                                                         | <b>Title of the news</b>                                                                                      |
|-------------------------|-------------------------------------------------------------------------------------------------------------------------------------------------------------------------------------------------------------------------------------------------------------------------|---------------------------------------------------------------------------------------------------------------|
| 24/06/2020              | <a href="https://www.tbsnews.net/coronavirus-chronicle/covid-19-bangladesh/icddrb-begin-covid-19-testing-97384">https://www.tbsnews.net/coronavirus-chronicle/covid-19-bangladesh/icddrb-begin-covid-19-testing-97384</a>                                               | <b>icddr,b to begin Covid-19 testing</b>                                                                      |
| 25/06/2020              | <a href="https://www.tbsnews.net/coronavirus-chronicle/covid-19-bangladesh/bgmea-hospital-chattogram-being-converted-covid-19">https://www.tbsnews.net/coronavirus-chronicle/covid-19-bangladesh/bgmea-hospital-chattogram-being-converted-covid-19</a>                 | <b>BGMEA Hospital in Chattogram being converted into Covid-19 isolation centre</b>                            |
| 26/06/2020              |                                                                                                                                                                                                                                                                         |                                                                                                               |
| 27/06/2020              | <a href="https://www.tbsnews.net/coronavirus-chronicle/covid-19-bangladesh/icu-scarcity-acute-yet-who-cares-98902">https://www.tbsnews.net/coronavirus-chronicle/covid-19-bangladesh/icu-scarcity-acute-yet-who-cares-98902</a>                                         | <b>ICU scarcity acute, yet who cares?</b>                                                                     |
| 27/06/2020              | <a href="https://www.tbsnews.net/coronavirus-chronicle/covid-19-bangladesh/70-bed-isolation-centre-opened-chattogram-98878">https://www.tbsnews.net/coronavirus-chronicle/covid-19-bangladesh/70-bed-isolation-centre-opened-chattogram-98878</a>                       | <b>70-bed isolation centre opened in Chattogram</b>                                                           |
| 28/06/2020              | <a href="https://www.tbsnews.net/economy/food-service-worker-family-starving-99295">https://www.tbsnews.net/economy/food-service-worker-family-starving-99295</a>                                                                                                       | <b>Food service worker, family starving</b>                                                                   |
| 28/06/2020              | <a href="https://www.tbsnews.net/coronavirus-chronicle/covid-19-bangladesh/clean-cities-initiative-jointly-launched-healthy">https://www.tbsnews.net/coronavirus-chronicle/covid-19-bangladesh/clean-cities-initiative-jointly-launched-healthy</a>                     | <b>The Clean Cities initiative jointly launched by Healthy Bangladesh, PPRC, UNDP</b>                         |
| 28/06/2020              | <a href="https://www.tbsnews.net/coronavirus-chronicle/covid-19-bangladesh/iom-opens-new-covid-19-isolation-and-treatment-centers">https://www.tbsnews.net/coronavirus-chronicle/covid-19-bangladesh/iom-opens-new-covid-19-isolation-and-treatment-centers</a>         | <b>IOM opens new Covid-19 isolation and treatment centers in Cox's Bazar</b>                                  |
| 29/06/2020              | <a href="https://www.tbsnews.net/coronavirus-chronicle/covid-19-bangladesh/cmp-bidyanondo-field-hospital-starts-operations-ctg">https://www.tbsnews.net/coronavirus-chronicle/covid-19-bangladesh/cmp-bidyanondo-field-hospital-starts-operations-ctg</a>               | <b>'CMP-Bidyanondo Field Hospital' starts operations in Ctg Wednesday</b>                                     |
| 30/06/2020              | <a href="https://www.tbsnews.net/economy/banking/bangladesh-bank-sees-pandemic-cloud-over-banks-100207">https://www.tbsnews.net/economy/banking/bangladesh-bank-sees-pandemic-cloud-over-banks-100207</a>                                                               | <b>Bangladesh Bank sees pandemic cloud over banks</b>                                                         |
| 01/07/2020              | <a href="https://www.tbsnews.net/coronavirus-chronicle/covid-19-bangladesh/bidyanondo-cmp-field-hospital-begins-journey-100684">https://www.tbsnews.net/coronavirus-chronicle/covid-19-bangladesh/bidyanondo-cmp-field-hospital-begins-journey-100684</a>               | <b>Bidyanondo-CMP field hospital begins journey</b>                                                           |
| 01/07/2020              | <a href="https://www.tbsnews.net/coronavirus-chronicle/covid-19-bangladesh/ilo-partners-bgmea-bkmea-launch-covid-19-safety-learning">https://www.tbsnews.net/coronavirus-chronicle/covid-19-bangladesh/ilo-partners-bgmea-bkmea-launch-covid-19-safety-learning</a>     | <b>ILO partners with BGMEA, BKMEA to launch Covid-19 safety "Learning Hub" for RMG workers</b>                |
| 01/07/2020              | <a href="https://www.tbsnews.net/coronavirus-chronicle/covid-19-bangladesh/new-building-ctg-port-hospital-inaugurated-treat-covid-19">https://www.tbsnews.net/coronavirus-chronicle/covid-19-bangladesh/new-building-ctg-port-hospital-inaugurated-treat-covid-19</a>   | <b>New building of Ctg Port Hospital inaugurated to treat Covid-19 patients</b>                               |
| 01/07/2020              | <a href="https://www.tbsnews.net/archive/2020/07/01">https://www.tbsnews.net/archive/2020/07/01</a>                                                                                                                                                                     | <b>Yunus Centre joins hand with prominent world figures to declare Covid-19 vaccine as global common good</b> |
| 02/07/2020              | <a href="https://www.tbsnews.net/coronavirus-chronicle/covid-19-bangladesh/bgmea-inaugurates-50-bed-dedicated-covid-19-field-hospital">https://www.tbsnews.net/coronavirus-chronicle/covid-19-bangladesh/bgmea-inaugurates-50-bed-dedicated-covid-19-field-hospital</a> | <b>BGMEA inaugurates 50-bed dedicated Covid-19 field hospital in Chattogram</b>                               |
| 03/07/2020              | <a href="https://www.tbsnews.net/economy/rmg/ilo-launches-covid-19-safety-training-rmg-workers-101170">https://www.tbsnews.net/economy/rmg/ilo-launches-covid-19-safety-training-rmg-workers-101170</a>                                                                 | <b>ILO launches Covid-19 safety training for RMG workers</b>                                                  |

| <b>Date of the news</b> | <b>News URL</b>                                                                                                                                                                                                                                                         | <b>Title of the news</b>                                                                              |
|-------------------------|-------------------------------------------------------------------------------------------------------------------------------------------------------------------------------------------------------------------------------------------------------------------------|-------------------------------------------------------------------------------------------------------|
| 04/07/2020              | <a href="https://www.tbsnews.net/coronavirus-chronicle/covid-19-bangladesh/samorita-hospital-opens-covid-19-unit-101788">https://www.tbsnews.net/coronavirus-chronicle/covid-19-bangladesh/samorita-hospital-opens-covid-19-unit-101788</a>                             | <b>Samorita Hospital opens Covid-19 unit</b>                                                          |
| 05/07/2020              | <a href="https://www.tbsnews.net/coronavirus-chronicle/covid-19-bangladesh/covid-19-units-open-four-khulna-private-hospitals-102208">https://www.tbsnews.net/coronavirus-chronicle/covid-19-bangladesh/covid-19-units-open-four-khulna-private-hospitals-102208</a>     | <b>Covid-19 units to open in four Khulna private hospitals</b>                                        |
| 06/07/2020              | <a href="https://www.tbsnews.net/companies/berger-paints-bangladesh-launches-hand-sanitisers-102649">https://www.tbsnews.net/companies/berger-paints-bangladesh-launches-hand-sanitisers-102649</a>                                                                     | <b>Berger Paints Bangladesh launches hand sanitisers</b>                                              |
| 06/07/2020              | <a href="https://www.tbsnews.net/coronavirus-chronicle/covid-19-bangladesh/four-khulna-pvt-hospitals-ready-covid-19-units-102598">https://www.tbsnews.net/coronavirus-chronicle/covid-19-bangladesh/four-khulna-pvt-hospitals-ready-covid-19-units-102598</a>           | <b>Four Khulna pvt hospitals to ready Covid-19 units</b>                                              |
| 06/07/2020              | <a href="https://www.tbsnews.net/coronavirus-chronicle/covid-19-bangladesh/barishal-and-khulna-healthcare-professionals-get-ipc-and">https://www.tbsnews.net/coronavirus-chronicle/covid-19-bangladesh/barishal-and-khulna-healthcare-professionals-get-ipc-and</a>     | <b>Barishal and Khulna healthcare professionals get IPC and PPE from UK AID and Concern Worldwide</b> |
| 07/07/2020              | <a href="https://www.tbsnews.net/bangladesh/health/only-9-public-hospitals-get-budget-allocation-oxygen-103195">https://www.tbsnews.net/bangladesh/health/only-9-public-hospitals-get-budget-allocation-oxygen-103195</a>                                               | <b>Only 9 public hospitals get budget allocation for oxygen</b>                                       |
| 08/07/2020              | <a href="https://www.tbsnews.net/coronavirus-chronicle/covid-19-bangladesh/96-covid-19-patients-recover-beacon-pharmas-favipira-trial">https://www.tbsnews.net/coronavirus-chronicle/covid-19-bangladesh/96-covid-19-patients-recover-beacon-pharmas-favipira-trial</a> | <b>96% of Covid-19 patients recover in Beacon pharma's Favipira trial</b>                             |
| 09/07/2020              | <a href="https://www.tbsnews.net/coronavirus-chronicle/covid-19-bangladesh/us-embassy-provides-covid-19-response-equipment-0">https://www.tbsnews.net/coronavirus-chronicle/covid-19-bangladesh/us-embassy-provides-covid-19-response-equipment-0</a>                   | <b>US Embassy provides Covid-19 response equipment to Bangladesh Police</b>                           |
| 10/07/2020              | <a href="https://www.tbsnews.net/coronavirus-chronicle/covid-19-bangladesh/website-launched-chattogram-make-covid-19-information">https://www.tbsnews.net/coronavirus-chronicle/covid-19-bangladesh/website-launched-chattogram-make-covid-19-information</a>           | <b>Website launched in Chattogram to make Covid-19 information easily accessible</b>                  |
| 11/07/2020              |                                                                                                                                                                                                                                                                         |                                                                                                       |
| 12/07/2020              | <a href="https://www.tbsnews.net/coronavirus-chronicle/covid-19-bangladesh/dghs-revokes-covid-19-testing-permission-5-institutes">https://www.tbsnews.net/coronavirus-chronicle/covid-19-bangladesh/dghs-revokes-covid-19-testing-permission-5-institutes</a>           | <b>DGHS revokes Covid-19 testing permission of 5 institutes</b>                                       |
| 12/07/2020              | <a href="https://www.tbsnews.net/companies/bashundhara-group-stands-families-3-covid-19-victim-journalists-105229">https://www.tbsnews.net/companies/bashundhara-group-stands-families-3-covid-19-victim-journalists-105229</a>                                         | <b>Bashundhara Group stands by families of 3 Covid-19 victim journalists</b>                          |
| 12/07/2020              | <a href="https://www.tbsnews.net/coronavirus-chronicle/covid-19-bangladesh/covid-19-negative-certificate-must-bangladeshis-travel">https://www.tbsnews.net/coronavirus-chronicle/covid-19-bangladesh/covid-19-negative-certificate-must-bangladeshis-travel</a>         | <b>Covid-19 negative certificates mandatory for air travel from July 23</b>                           |
| 13/07/2020              | <a href="https://www.tbsnews.net/coronavirus-chronicle/covid-19-bangladesh/only-families-dead-frontline-fighters-will-get">https://www.tbsnews.net/coronavirus-chronicle/covid-19-bangladesh/only-families-dead-frontline-fighters-will-get</a>                         | <b>Only families of dead frontline fighters will get compensation for now</b>                         |
| 14/07/2020              | <a href="https://www.tbsnews.net/companies/employees-top-priority-marico-bangladesh-amid-pandemic-106300">https://www.tbsnews.net/companies/employees-top-priority-marico-bangladesh-amid-pandemic-106300</a>                                                           | <b>Employees top priority to Marico Bangladesh amid pandemic</b>                                      |
| 14/07/2020              | <a href="https://www.tbsnews.net/coronavirus-chronicle/covid-19-bangladesh/ruet-students-develop-emergency-ventilators-covid-19">https://www.tbsnews.net/coronavirus-chronicle/covid-19-bangladesh/ruet-students-develop-emergency-ventilators-covid-19</a>             | <b>RUET students develop emergency ventilators for Covid-19 patients</b>                              |
| 15/07/2020              |                                                                                                                                                                                                                                                                         |                                                                                                       |

| Date of the news | News URL                                                                                                                                                                                                                                                                | Title of the news                                                                      |
|------------------|-------------------------------------------------------------------------------------------------------------------------------------------------------------------------------------------------------------------------------------------------------------------------|----------------------------------------------------------------------------------------|
| 16/07/2020       | <a href="https://www.tbsnews.net/coronavirus-chronicle/covid-19-bangladesh/coxs-bazar-dc-hands-over-financial-aid-433-small-tourism">https://www.tbsnews.net/coronavirus-chronicle/covid-19-bangladesh/coxs-bazar-dc-hands-over-financial-aid-433-small-tourism</a>     | <b>Cox's Bazar DC hands over financial aid to 433 small tourism-related businesses</b> |
| 16/07/2020       | <a href="https://www.tbsnews.net/coronavirus-chronicle/covid-19-bangladesh/covid-19-decreased-income-has-affected-livelihood-983-poor">https://www.tbsnews.net/coronavirus-chronicle/covid-19-bangladesh/covid-19-decreased-income-has-affected-livelihood-983-poor</a> | <b>Covid-19: Decreased income has affected livelihood of 98.3% of the poor</b>         |
| 16/07/2020       | <a href="https://www.tbsnews.net/coronavirus-chronicle/covid-19-bangladesh/clinic-sealed-pabna-covid-19-sample-collection-sans">https://www.tbsnews.net/coronavirus-chronicle/covid-19-bangladesh/clinic-sealed-pabna-covid-19-sample-collection-sans</a>               | <b>Clinic sealed off in Pabna for Covid-19 sample collection sans approval</b>         |
| 17/07/2020       |                                                                                                                                                                                                                                                                         |                                                                                        |
| 18/07/2020       | <a href="https://www.tbsnews.net/bangladesh/health/16-hospitals-recommended-international-passengers-covid-19-test-107941">https://www.tbsnews.net/bangladesh/health/16-hospitals-recommended-international-passengers-covid-19-test-107941</a>                         | <b>16 hospitals recommended for international passengers' Covid-19 test</b>            |
| 19/07/2020       | <a href="https://www.tbsnews.net/bangladesh/health/khulna-upazila-hospitals-leave-patients-lurch-108352">https://www.tbsnews.net/bangladesh/health/khulna-upazila-hospitals-leave-patients-lurch-108352</a>                                                             | <b>Khulna upazila hospitals leave patients in the lurch</b>                            |
| 20/07/2020       | <a href="https://www.tbsnews.net/coronavirus-chronicle/covid-19-bangladesh/no-covid-19-tests-treatment-except-govt-approved">https://www.tbsnews.net/coronavirus-chronicle/covid-19-bangladesh/no-covid-19-tests-treatment-except-govt-approved</a>                     | <b>No Covid-19 tests, treatment except in govt-approved institutions: DGHS</b>         |
| 20/07/2020       | <a href="https://www.tbsnews.net/coronavirus-chronicle/covid-19-bangladesh/testing-launched-provide-covid-19-certificates-travellers">https://www.tbsnews.net/coronavirus-chronicle/covid-19-bangladesh/testing-launched-provide-covid-19-certificates-travellers</a>   | <b>Testing launched to provide Covid-19 certificates for travellers: ISPR</b>          |
| 21/07/2020       | <a href="https://www.tbsnews.net/coronavirus-chronicle/covid-19-bangladesh/test-starts-proposed-covid-19-facility-mohakhali-under">https://www.tbsnews.net/coronavirus-chronicle/covid-19-bangladesh/test-starts-proposed-covid-19-facility-mohakhali-under</a>         | <b>Test starts at proposed Covid-19 facility in Mohakhali under army supervision</b>   |
| 22/07/2020       | <a href="https://www.tbsnews.net/coronavirus-chronicle/covid-19-bangladesh/bangladesh-makes-covid-19-certificate-mandatory-most">https://www.tbsnews.net/coronavirus-chronicle/covid-19-bangladesh/bangladesh-makes-covid-19-certificate-mandatory-most</a>             | <b>Bangladesh makes Covid-19 certificate mandatory for most foreigners to depart</b>   |
| 23/07/2020       |                                                                                                                                                                                                                                                                         |                                                                                        |
| 24/07/2020       |                                                                                                                                                                                                                                                                         |                                                                                        |
| 25/07/2020       | <a href="https://www.tbsnews.net/coronavirus-chronicle/covid-19-bangladesh/contact-numbers-covid-19-testing-centres-expats-111286">https://www.tbsnews.net/coronavirus-chronicle/covid-19-bangladesh/contact-numbers-covid-19-testing-centres-expats-111286</a>         | <b>Contact numbers of Covid-19 testing centres for expats</b>                          |
| 26/07/2020       | <a href="https://www.tbsnews.net/coronavirus-chronicle/brac-school-joins-global-project-analysing-gendered-dynamics-covid-19-111793">https://www.tbsnews.net/coronavirus-chronicle/brac-school-joins-global-project-analysing-gendered-dynamics-covid-19-111793</a>     | <b>Online centre launched to expand Covid-19 and gender studies</b>                    |
| 27/07/2020       | <a href="https://www.tbsnews.net/coronavirus-chronicle/covid-19-bangladesh/igp-inaugurates-covid-19-ward-amcgh-112375">https://www.tbsnews.net/coronavirus-chronicle/covid-19-bangladesh/igp-inaugurates-covid-19-ward-amcgh-112375</a>                                 | <b>IGP inaugurates Covid-19 ward at AMCGH</b>                                          |
| 27/07/2020       | <a href="https://www.tbsnews.net/coronavirus-chronicle/covid-19-bangladesh/dr-zafrullah-wants-pm-open-gonoshasthaya-corona-unit">https://www.tbsnews.net/coronavirus-chronicle/covid-19-bangladesh/dr-zafrullah-wants-pm-open-gonoshasthaya-corona-unit</a>             | <b>Dr Zafrullah wants PM to open Gonoshasthaya corona unit</b>                         |
| 28/07/2020       | <a href="https://www.tbsnews.net/coronavirus-chronicle/covid-19-bangladesh/iom-supports-government-led-efforts-points-entry-combat">https://www.tbsnews.net/coronavirus-chronicle/covid-19-bangladesh/iom-supports-government-led-efforts-points-entry-combat</a>       | <b>IOM supports government-led efforts at points of entry to combat Covid-19</b>       |
| 28/07/2020       | <a href="https://www.tbsnews.net/coronavirus-chronicle/covid-19-bangladesh/chevron-provides-covid-19-relief-nine-schools-dhaka-112693">https://www.tbsnews.net/coronavirus-chronicle/covid-19-bangladesh/chevron-provides-covid-19-relief-nine-schools-dhaka-112693</a> | <b>Chevron provides Covid-19 relief to nine schools in Dhaka</b>                       |



| Date of the news | News URL                                                                                                                                                                                                                                                                | Title of the news                                                                                  |
|------------------|-------------------------------------------------------------------------------------------------------------------------------------------------------------------------------------------------------------------------------------------------------------------------|----------------------------------------------------------------------------------------------------|
| 29/07/2020       |                                                                                                                                                                                                                                                                         |                                                                                                    |
| 30/07/2020       | <a href="https://www.tbsnews.net/coronavirus-chronicle/covid-19-bangladesh/icddrb-provide-covid-19-free-certificates-foreigners">https://www.tbsnews.net/coronavirus-chronicle/covid-19-bangladesh/icddrb-provide-covid-19-free-certificates-foreigners</a>             | <b>Icddr,b to provide Covid-19-free certificates to foreigners</b>                                 |
| 31/07/2020       | <a href="https://www.tbsnews.net/companies/urmi-group-introduces-high-performace-anti-viral-face-mask-turag-protex-114112">https://www.tbsnews.net/companies/urmi-group-introduces-high-performace-anti-viral-face-mask-turag-protex-114112</a>                         | <b>Urmi Group introduces high performace anti-viral face mask "Turag Protex"</b>                   |
| 31/07/2020       | <a href="https://www.tbsnews.net/coronavirus-chronicle/covid-19-bangladesh/pcr-labs-remain-open-covid-19-test-during-eid-holidays">https://www.tbsnews.net/coronavirus-chronicle/covid-19-bangladesh/pcr-labs-remain-open-covid-19-test-during-eid-holidays</a>         | <b>PCR labs to remain open for Covid-19 test during Eid holidays</b>                               |
| 01/08/2020       | <a href="https://www.tbsnews.net/economy/rmg/coronavirus-takes-away-joys-eid-rmg-workers-gazipur-114427">https://www.tbsnews.net/economy/rmg/coronavirus-takes-away-joys-eid-rmg-workers-gazipur-114427</a>                                                             | <b>Coronavirus takes away the joys of Eid from RMG workers in Gazipur</b>                          |
| 01/09/2020       | <a href="https://www.tbsnews.net/bangladesh/health/right-way-127108">https://www.tbsnews.net/bangladesh/health/right-way-127108</a>                                                                                                                                     | <b>Is this the right way?</b>                                                                      |
| 01/09/2020       | <a href="https://www.tbsnews.net/coronavirus-chronicle/covid-19-bangladesh/bus-services-resume-fully-amid-no-clear-trend-infection">https://www.tbsnews.net/coronavirus-chronicle/covid-19-bangladesh/bus-services-resume-fully-amid-no-clear-trend-infection</a>       | <b>Bus services resume fully amid no clear trend of infection</b>                                  |
| 01/09/2020       | <a href="https://www.tbsnews.net/economy/rmg/rmg-exports-back-track-after-7-months-127105">https://www.tbsnews.net/economy/rmg/rmg-exports-back-track-after-7-months-127105</a>                                                                                         | <b>RMG exports back on track after 7 months</b>                                                    |
| 01/09/2020       | <a href="https://www.tbsnews.net/economy/smes-deserve-more-support-amid-covid-19-pandemic-speakers-127084">https://www.tbsnews.net/economy/smes-deserve-more-support-amid-covid-19-pandemic-speakers-127084</a>                                                         | <b>SMEs deserve more support amid Covid-19 pandemic: Speakers</b>                                  |
| 02/09/2020       | <a href="https://www.tbsnews.net/bangladesh/education/university-students-get-cheap-internet-127603">https://www.tbsnews.net/bangladesh/education/university-students-get-cheap-internet-127603</a>                                                                     | <b>University students to get cheap internet</b>                                                   |
| 02/09/2020       | <a href="https://www.tbsnews.net/bangladesh/education/class-8-students-get-promotion-without-exams-127582">https://www.tbsnews.net/bangladesh/education/class-8-students-get-promotion-without-exams-127582</a>                                                         | <b>Class-8 students to get promotion without exams</b>                                             |
| 02/09/2020       | <a href="https://www.tbsnews.net/feature/panorama/saki-chowdhury-queen-awardees-quest-raise-funds-bangladeshi-covid-19-victims-127174">https://www.tbsnews.net/feature/panorama/saki-chowdhury-queen-awardees-quest-raise-funds-bangladeshi-covid-19-victims-127174</a> | <b>Saki Chowdhury: A Queen Awardee's quest to raise funds for Bangladeshi Covid-19 victims</b>     |
| 02/09/2020       | <a href="https://www.tbsnews.net/feature/panorama/pandemic-silences-musical-instrument-127729">https://www.tbsnews.net/feature/panorama/pandemic-silences-musical-instrument-127729</a>                                                                                 | <b>The pandemic silences musical instrument</b>                                                    |
| 03/09/2020       | <a href="https://www.tbsnews.net/world/global-economy/japan-adds-india-and-bangladesh-china-exit-subsidy-destinations-128035">https://www.tbsnews.net/world/global-economy/japan-adds-india-and-bangladesh-china-exit-subsidy-destinations-128035</a>                   | <b>Japan adds India and Bangladesh to 'China exit' subsidy destinations</b>                        |
| 03/09/2020       | <a href="https://www.tbsnews.net/economy/industry/covid-crushes-local-rod-cement-business-127690">https://www.tbsnews.net/economy/industry/covid-crushes-local-rod-cement-business-127690</a>                                                                           | <b>Covid crushes local rod-cement business</b>                                                     |
| 04/09/2020       | <a href="https://www.tbsnews.net/economy/rmg/apparel-factories-look-workers-hinting-recovery-128446">https://www.tbsnews.net/economy/rmg/apparel-factories-look-workers-hinting-recovery-128446</a>                                                                     | <b>Apparel factories look for workers, hinting at recovery</b>                                     |
| 04/09/2020       | <a href="https://www.tbsnews.net/coronavirus-chronicle/covid-19-bangladesh/korean-cro-conduct-phase-iii-trial-sinovacs-covid-19">https://www.tbsnews.net/coronavirus-chronicle/covid-19-bangladesh/korean-cro-conduct-phase-iii-trial-sinovacs-covid-19</a>             | <b>icddr,b to run the Covid-19 vaccine trial in Bangladesh, Korean CRO will monitor trial data</b> |
| 05/09/2020       | <a href="https://www.tbsnews.net/bangladesh/long-road-recovery-real-estate-sector-128878">https://www.tbsnews.net/bangladesh/long-road-recovery-real-estate-sector-128878</a>                                                                                           | <b>Long road to recovery for real estate sector</b>                                                |
| 05/09/2020       | <a href="https://www.tbsnews.net/economy/trade/exports-cruising-nicely-amid-pandemic-128869">https://www.tbsnews.net/economy/trade/exports-cruising-nicely-amid-pandemic-128869</a>                                                                                     | <b>Exports cruising nicely amid pandemic</b>                                                       |

| <b>Date of the news</b> | <b>News URL</b>                                                                                                                                                                                                                                                   | <b>Title of the news</b>                                                                        |
|-------------------------|-------------------------------------------------------------------------------------------------------------------------------------------------------------------------------------------------------------------------------------------------------------------|-------------------------------------------------------------------------------------------------|
| 05/09/2020              | <a href="https://www.tbsnews.net/economy/missed-instalments-leave-many-realtors-soup-128875">https://www.tbsnews.net/economy/missed-instalments-leave-many-realtors-soup-128875</a>                                                                               | <b>Missed instalments leave many realtors in the soup</b>                                       |
| 05/09/2020              | <a href="https://www.tbsnews.net/bangladesh/migration/returnee-women-migrants-receive-covid-19-prevention-packages-128854">https://www.tbsnews.net/bangladesh/migration/returnee-women-migrants-receive-covid-19-prevention-packages-128854</a>                   | <b>Returnee women migrants to receive Covid-19 prevention packages</b>                          |
| 05/09/2020              | <a href="https://www.tbsnews.net/economy/covid-19-women-bear-economic-brunt-most-128506">https://www.tbsnews.net/economy/covid-19-women-bear-economic-brunt-most-128506</a>                                                                                       | <b>Covid-19: Women bear the economic brunt the most</b>                                         |
| 05/09/2020              | <a href="https://www.tbsnews.net/bangladesh/transport/6-lakh-smart-driving-licence-seekers-caught-brta-puzzle-128515">https://www.tbsnews.net/bangladesh/transport/6-lakh-smart-driving-licence-seekers-caught-brta-puzzle-128515</a>                             | <b>6 lakh smart driving licence seekers caught in BRTA puzzle</b>                               |
| 06/09/2020              | <a href="https://www.tbsnews.net/economy/banking/internet-banking-transaction-ceiling-enhanced-four-times-129334">https://www.tbsnews.net/economy/banking/internet-banking-transaction-ceiling-enhanced-four-times-129334</a>                                     | <b>Internet Banking transaction ceiling enhanced by four times</b>                              |
| 06/09/2020              | <a href="https://www.tbsnews.net/bangladesh/education/public-university-students-get-loan-smartphone-129319">https://www.tbsnews.net/bangladesh/education/public-university-students-get-loan-smartphone-129319</a>                                               | <b>Public university students to get loan for smartphone</b>                                    |
| 06/09/2020              | <a href="https://www.tbsnews.net/coronavirus-chronicle/covid-19-bangladesh/bangladesh-completes-genome-sequencing-263-covid-19">https://www.tbsnews.net/coronavirus-chronicle/covid-19-bangladesh/bangladesh-completes-genome-sequencing-263-covid-19</a>         | <b>Bangladesh completes genome sequencing of 263 Covid-19 samples</b>                           |
| 07/09/2020              | <a href="https://www.tbsnews.net/analysis/6-months-covid-bangladesh-looking-back-and-forward-129769">https://www.tbsnews.net/analysis/6-months-covid-bangladesh-looking-back-and-forward-129769</a>                                                               | <b>6 months of Covid in Bangladesh: Looking back and forward</b>                                |
| 07/09/2020              | <a href="https://www.tbsnews.net/economy/banking/stimulus-packages-disbursement-picks-business-normalises-129760">https://www.tbsnews.net/economy/banking/stimulus-packages-disbursement-picks-business-normalises-129760</a>                                     | <b>Stimulus packages: Disbursement picks up as business normalises</b>                          |
| 07/09/2020              | <a href="https://www.tbsnews.net/analysis/economy-recovery-track-129754">https://www.tbsnews.net/analysis/economy-recovery-track-129754</a>                                                                                                                       | <b>Economy on a recovery track</b>                                                              |
| 07/09/2020              | <a href="https://www.tbsnews.net/coronavirus-chronicle/covid-19-bangladesh/brac-university-fast-track-cold-chain-assessment-design">https://www.tbsnews.net/coronavirus-chronicle/covid-19-bangladesh/brac-university-fast-track-cold-chain-assessment-design</a> | <b>BRAC University to fast-track cold-chain assessment, design of mass Covid-19 vaccination</b> |
| 07/09/2020              | <a href="https://www.tbsnews.net/coronavirus-chronicle/covid-19-bangladesh/bangladesh-army-donates-covid-19-medical-equipment">https://www.tbsnews.net/coronavirus-chronicle/covid-19-bangladesh/bangladesh-army-donates-covid-19-medical-equipment</a>           | <b>Bangladesh Army donates Covid-19 medical equipment to Evercare Hospital</b>                  |
| 07/09/2020              | <a href="https://www.tbsnews.net/economy/banking/brac-bank-offers-healthcare-package-mastercard-users-129529">https://www.tbsnews.net/economy/banking/brac-bank-offers-healthcare-package-mastercard-users-129529</a>                                             | <b>BRAC Bank offers healthcare package for MasterCard users</b>                                 |
| 07/09/2020              | <a href="https://www.tbsnews.net/economy/rmg/covid-19-affected-livelihoods-82pc-rmg-workers-sanem-129505">https://www.tbsnews.net/economy/rmg/covid-19-affected-livelihoods-82pc-rmg-workers-sanem-129505</a>                                                     | <b>Covid-19 affected livelihoods of 82% of RMG workers: Sanem</b>                               |
| 08/09/2020              | <a href="https://www.tbsnews.net/analysis/v-shaped-recovery-likely-health-worries-still-remain-strong-130249">https://www.tbsnews.net/analysis/v-shaped-recovery-likely-health-worries-still-remain-strong-130249</a>                                             | <b>As a V-shaped recovery is likely, health worries still remain strong</b>                     |
| 08/09/2020              | <a href="https://www.tbsnews.net/analysis/smes-need-be-salvaged-complete-recovery-130243">https://www.tbsnews.net/analysis/smes-need-be-salvaged-complete-recovery-130243</a>                                                                                     | <b>SMEs need to be salvaged for complete recovery</b>                                           |
| 08/09/2020              | <a href="https://www.tbsnews.net/economy/mixed-bag-recovery-130252">https://www.tbsnews.net/economy/mixed-bag-recovery-130252</a>                                                                                                                                 | <b>A mixed bag of recovery</b>                                                                  |
| 08/09/2020              | <a href="https://www.tbsnews.net/economy/dhaka-opens-arms-japanese-investment-130234">https://www.tbsnews.net/economy/dhaka-opens-arms-japanese-investment-130234</a>                                                                                             | <b>Dhaka opens arms to Japanese investment</b>                                                  |

| <b>Date of the news</b> | <b>News URL</b>                                                                                                                                                                                                                                                   | <b>Title of the news</b>                                                               |
|-------------------------|-------------------------------------------------------------------------------------------------------------------------------------------------------------------------------------------------------------------------------------------------------------------|----------------------------------------------------------------------------------------|
| 08/09/2020              | <a href="https://www.tbsnews.net/coronavirus-chronicle/covid-19-bangladesh/dghs-suspends-covid-19-testing-permission-aalok-health">https://www.tbsnews.net/coronavirus-chronicle/covid-19-bangladesh/dghs-suspends-covid-19-testing-permission-aalok-health</a>   | <b>DGHS suspends Covid-19 testing permission of Aalok Health Care</b>                  |
| 08/09/2020              | <a href="https://www.tbsnews.net/bangladesh/education/ministry-asks-authorities-prepare-reopening-primary-schools-130168">https://www.tbsnews.net/bangladesh/education/ministry-asks-authorities-prepare-reopening-primary-schools-130168</a>                     | <b>Ministry asks authorities to prepare for reopening primary schools</b>              |
| 08/09/2020              | <a href="https://www.tbsnews.net/coronavirus-chronicle/covid-19-bangladesh/isde-distributes-food-disinfectant-700-jobless-families">https://www.tbsnews.net/coronavirus-chronicle/covid-19-bangladesh/isde-distributes-food-disinfectant-700-jobless-families</a> | <b>ISDE distributes food, disinfectant to 700 jobless families</b>                     |
| 08/09/2020              | <a href="https://www.tbsnews.net/analysis/covid-19-six-months-how-pandemic-affected-health-and-economy-bangladesh-130066">https://www.tbsnews.net/analysis/covid-19-six-months-how-pandemic-affected-health-and-economy-bangladesh-130066</a>                     | <b>Covid-19 six months: How the pandemic affected health and economy of Bangladesh</b> |
| 08/09/2020              | <a href="https://www.tbsnews.net/thoughts/covid-19-double-blow-youth-130018">https://www.tbsnews.net/thoughts/covid-19-double-blow-youth-130018</a>                                                                                                               | <b>Covid-19 is a double blow for the youth</b>                                         |
| 08/09/2020              | <a href="https://www.tbsnews.net/feature/panorama/where-new-normal-129832">https://www.tbsnews.net/feature/panorama/where-new-normal-129832</a>                                                                                                                   | <b>Where is the 'new normal'?</b>                                                      |
| 09/09/2020              | <a href="https://www.tbsnews.net/bangladesh/revenue-generation-shows-little-sign-recovery-130780">https://www.tbsnews.net/bangladesh/revenue-generation-shows-little-sign-recovery-130780</a>                                                                     | <b>Revenue generation shows little sign of recovery</b>                                |
| 09/09/2020              | <a href="https://www.tbsnews.net/bangladesh/education/covid-19-school-closure-cause-skill-loss-throughout-century-130774">https://www.tbsnews.net/bangladesh/education/covid-19-school-closure-cause-skill-loss-throughout-century-130774</a>                     | <b>Covid-19 school loss to hurt economy through the century</b>                        |
| 09/09/2020              | <a href="https://www.tbsnews.net/economy/stock/associated-oxygen-ipo-subscription-begins-thursday-130738">https://www.tbsnews.net/economy/stock/associated-oxygen-ipo-subscription-begins-thursday-130738</a>                                                     | <b>Associated Oxygen IPO subscription begins Thursday</b>                              |
| 09/09/2020              | <a href="https://www.tbsnews.net/economy/stock/associated-oxygen-ipo-subscription-begins-thursday-130738">https://www.tbsnews.net/economy/stock/associated-oxygen-ipo-subscription-begins-thursday-130738</a>                                                     | <b>Banks' CSR expenditure in health sector almost doubles during pandemic</b>          |
| 10/09/2020              | <a href="https://www.tbsnews.net/bangladesh/health/online-appointments-outdoor-medical-services-bsmmu-available-now-131266">https://www.tbsnews.net/bangladesh/health/online-appointments-outdoor-medical-services-bsmmu-available-now-131266</a>                 | <b>Online appointments for outdoor medical services at BSMMU available now</b>         |
| 10/9/2020               | <a href="https://www.tbsnews.net/economy/industry/tourism-needs-skilled-workforce-131122">https://www.tbsnews.net/economy/industry/tourism-needs-skilled-workforce-131122</a>                                                                                     | <b>Tourism needs skilled workforce</b>                                                 |
| 10/09/2020              | <a href="https://www.tbsnews.net/bangladesh/applied-all-countries-covid-19-vaccine-pm-130978">https://www.tbsnews.net/bangladesh/applied-all-countries-covid-19-vaccine-pm-130978</a>                                                                             | <b>Applied to all countries for Covid-19 vaccine: PM</b>                               |
| 10/09/2020              | <a href="https://www.tbsnews.net/companies/guardian-life-insurance-launches-online-programme-youths-skill-development-130972">https://www.tbsnews.net/companies/guardian-life-insurance-launches-online-programme-youths-skill-development-130972</a>             | <b>Guardian Life Insurance launches online programme for youth's skill development</b> |
| 11/9                    | <a href="https://www.tbsnews.net/coronavirus-chronicle/covid-19-bangladesh/govt-will-bring-vaccine-whenever-available-momen-131560">https://www.tbsnews.net/coronavirus-chronicle/covid-19-bangladesh/govt-will-bring-vaccine-whenever-available-momen-131560</a> | <b>Govt will bring vaccine from wherever available: Momen</b>                          |
| 11/09/2020              | <a href="https://www.tbsnews.net/economy/rules-cards-protect-online-buyers-interests-131665">https://www.tbsnews.net/economy/rules-cards-protect-online-buyers-interests-131665</a>                                                                               | <b>Rules on cards to protect online buyers' interests</b>                              |
| 11/09/2020              | <a href="https://www.tbsnews.net/thoughts/diminishing-dreams-english-medium-private-candidates-131302">https://www.tbsnews.net/thoughts/diminishing-dreams-english-medium-private-candidates-131302</a>                                                           | <b>Diminishing dreams of English medium private candidates</b>                         |
| 12/09/2020              | <a href="https://www.tbsnews.net/bangladesh/telecom/robi-clocks-33-profit-amid-pandemic-132025">https://www.tbsnews.net/bangladesh/telecom/robi-clocks-33-profit-amid-pandemic-132025</a>                                                                         | <b>Robi clocks 3.3% profit amid pandemic</b>                                           |
| 12/09/2020              | <a href="https://www.tbsnews.net/bangladesh/law-order/right-health-needs-be-preserved-amid-pandemic-legal-experts-132028">https://www.tbsnews.net/bangladesh/law-order/right-health-needs-be-preserved-amid-pandemic-legal-experts-132028</a>                     | <b>Right to health needs to be preserved amid pandemic: Legal experts</b>              |



| <b>Date of the news</b> | <b>News URL</b>                                                                                                                                                                                                                                                         | <b>Title of the news</b>                                                                                          |
|-------------------------|-------------------------------------------------------------------------------------------------------------------------------------------------------------------------------------------------------------------------------------------------------------------------|-------------------------------------------------------------------------------------------------------------------|
| 12/09/2020              | <a href="https://www.tbsnews.net/economy/aviation/no-more-seating-restrictions-domestic-flights-tomorrow-caab-132001">https://www.tbsnews.net/economy/aviation/no-more-seating-restrictions-domestic-flights-tomorrow-caab-132001</a>                                   | <b>No more seating restrictions on domestic flights from tomorrow: CAAB</b>                                       |
| 12/09/2020              | <a href="https://www.tbsnews.net/bangladesh/education/revamped-education-policy-focus-e-learning-dipu-moni-131992">https://www.tbsnews.net/bangladesh/education/revamped-education-policy-focus-e-learning-dipu-moni-131992</a>                                         | <b>Revamped education policy to focus on e-learning : Dipu Moni</b>                                               |
| 13/09/2020              | <a href="https://www.tbsnews.net/economy/banking/school-banking-thrives-amid-pandemic-132433">https://www.tbsnews.net/economy/banking/school-banking-thrives-amid-pandemic-132433</a>                                                                                   | <b>School banking thrives amid pandemic</b>                                                                       |
| 13/09/2020              | <a href="https://www.tbsnews.net/economy/banking/5-lakh-social-safety-net-accounts-opened-during-apr-jun-132436">https://www.tbsnews.net/economy/banking/5-lakh-social-safety-net-accounts-opened-during-apr-jun-132436</a>                                             | <b>5 lakh social safety net accounts opened during Apr-Jun</b>                                                    |
| 13/09/2020              | <a href="https://www.tbsnews.net/bangladesh/education/class-xi-admission-process-begins-132331">https://www.tbsnews.net/bangladesh/education/class-xi-admission-process-begins-132331</a>                                                                               | <b>College admission begins</b>                                                                                   |
| 14/09/2020              | <a href="https://www.tbsnews.net/economy/aviation/pilots-overstressed-132973">https://www.tbsnews.net/economy/aviation/pilots-overstressed-132973</a>                                                                                                                   | <b>Pilots overstressed</b>                                                                                        |
| 14/09/2020              | <a href="https://www.tbsnews.net/bangladesh/health/evercare-hospital-offers-bmt-services-first-time-bangladesh-132910">https://www.tbsnews.net/bangladesh/health/evercare-hospital-offers-bmt-services-first-time-bangladesh-132910</a>                                 | <b>Evercare Hospital offers all kinds of BMT services for first time in Bangladesh</b>                            |
| 14/09/2020              | <a href="https://www.tbsnews.net/coronavirus-chronicle/covid-19-bangladesh/significant-losses-income-due-covid-19-lead-food">https://www.tbsnews.net/coronavirus-chronicle/covid-19-bangladesh/significant-losses-income-due-covid-19-lead-food</a>                     | <b>Income losses lead to food insecurity in Cox's Bazar Sadar during pandemic: WFP</b>                            |
| 15/09/2020              | <a href="https://www.tbsnews.net/economy/ctg-customs-posts-positive-growth-revenue-collection-133462">https://www.tbsnews.net/economy/ctg-customs-posts-positive-growth-revenue-collection-133462</a>                                                                   | <b>Ctg customs posts positive growth in revenue collection</b>                                                    |
| 15/09/2020              | <a href="https://www.tbsnews.net/bangladesh/govt-job-seekers-get-flexibility-age-limit-due-pandemic-133459">https://www.tbsnews.net/bangladesh/govt-job-seekers-get-flexibility-age-limit-due-pandemic-133459</a>                                                       | <b>Govt job seekers to get flexibility on age-limit due to pandemic</b>                                           |
| 15/09/2020              | <a href="https://www.tbsnews.net/bangladesh/education/jsc-jdc-students-be-promoted-evaluation-schools-ministry-133447">https://www.tbsnews.net/bangladesh/education/jsc-jdc-students-be-promoted-evaluation-schools-ministry-133447</a>                                 | <b>JSC, JDC students to be promoted as per evaluation by schools: Ministry</b>                                    |
| 15/09/2020              | <a href="https://www.tbsnews.net/bangladesh/transport/100pc-train-ticket-sale-begins-wednesday-133300">https://www.tbsnews.net/bangladesh/transport/100pc-train-ticket-sale-begins-wednesday-133300</a>                                                                 | <b>Passenger trains to resume operation at full capacity from Wednesday</b>                                       |
| 15/09/2020              | <a href="https://www.tbsnews.net/economy/adb-forecasts-68-percent-growth-bangladesh-current-fiscal-133039">https://www.tbsnews.net/economy/adb-forecasts-68-percent-growth-bangladesh-current-fiscal-133039</a>                                                         | <b>ADB sees robust growth for Bangladesh, fourth in Asia</b>                                                      |
| 16/09/2020              | <a href="https://www.tbsnews.net/economy/655-beneficiaries-social-safety-nets-are-non-poor-cpd-133675">https://www.tbsnews.net/economy/655-beneficiaries-social-safety-nets-are-non-poor-cpd-133675</a>                                                                 | <b>Non-poor eatup bigger pie of safety allowances</b>                                                             |
| 17/09/2020              | <a href="https://www.tbsnews.net/coronavirus-chronicle/covid-19-bangladesh/saif-power-group-donates-4-sets-high-power-oxygen-nasal">https://www.tbsnews.net/coronavirus-chronicle/covid-19-bangladesh/saif-power-group-donates-4-sets-high-power-oxygen-nasal</a>       | <b>Saif Power Group donates 4 sets of high-power oxygen nasal cannulas to Cox's Bazar district administration</b> |
| 17/09/2020              | <a href="https://www.tbsnews.net/coronavirus-chronicle/covid-19-bangladesh/covid-19-status-capital-3-hospitals-discarded-134221">https://www.tbsnews.net/coronavirus-chronicle/covid-19-bangladesh/covid-19-status-capital-3-hospitals-discarded-134221</a>             | <b>Covid-19 status of capital's 3 hospitals discarded</b>                                                         |
| 18/09/2020              | <a href="https://www.tbsnews.net/coronavirus-chronicle/covid-19-bangladesh/chattogram-covid-facilities-shutting-down-over-fund-crisis">https://www.tbsnews.net/coronavirus-chronicle/covid-19-bangladesh/chattogram-covid-facilities-shutting-down-over-fund-crisis</a> | <b>Chattogram Covid facilities shutting down over fund crisis</b>                                                 |
| 19/09/2020              | <a href="https://www.tbsnews.net/coronavirus-chronicle/covid-19-bangladesh/scientists-find-sars-cov-2-rna-bangladesh-wastewater">https://www.tbsnews.net/coronavirus-chronicle/covid-19-bangladesh/scientists-find-sars-cov-2-rna-bangladesh-wastewater</a>             | <b>Scientists find SARS-CoV-2 RNA in Bangladesh wastewater</b>                                                    |

| <b>Date of the news</b> | <b>News URL</b>                                                                                                                                                                                                                                                     | <b>Title of the news</b>                                                          |
|-------------------------|---------------------------------------------------------------------------------------------------------------------------------------------------------------------------------------------------------------------------------------------------------------------|-----------------------------------------------------------------------------------|
| 20/09/2020              | <a href="https://www.tbsnews.net/bangladesh/labour-welfare-foundation-provides-tk40cr-9500-workers-135493">https://www.tbsnews.net/bangladesh/labour-welfare-foundation-provides-tk40cr-9500-workers-135493</a>                                                     | <b>Labour Welfare Foundation provides Tk40cr to 9,500 workers</b>                 |
| 21/09/2020              | <a href="https://www.tbsnews.net/bangladesh/ngos-crisis-pandemic-shrinks-funds-135976">https://www.tbsnews.net/bangladesh/ngos-crisis-pandemic-shrinks-funds-135976</a>                                                                                             | <b>NGOs in crisis as pandemic shrinks funds</b>                                   |
| 21/09/2020              | <a href="https://www.tbsnews.net/coronavirus-chronicle/covid-19-bangladesh/bangladesh-talks-least-5-vaccine-makers-135904">https://www.tbsnews.net/coronavirus-chronicle/covid-19-bangladesh/bangladesh-talks-least-5-vaccine-makers-135904</a>                     | <b>'Bangladesh in talks with at least 5 vaccine makers'</b>                       |
| 21/09/2020              | <a href="https://www.tbsnews.net/coronavirus-chronicle/covid-19-bangladesh/pm-all-out-preparations-fight-possible-second-wave-covid">https://www.tbsnews.net/coronavirus-chronicle/covid-19-bangladesh/pm-all-out-preparations-fight-possible-second-wave-covid</a> | <b>Prepare to tackle second wave of Covid-19: PM</b>                              |
| 21/09/2020              | <a href="https://www.tbsnews.net/bangladesh/wfp-provides-cash-assistance-urban-poor-meet-food-nutrition-needs-135649">https://www.tbsnews.net/bangladesh/wfp-provides-cash-assistance-urban-poor-meet-food-nutrition-needs-135649</a>                               | <b>WFP provides cash assistance to urban poor to meet food, nutrition needs</b>   |
| 21/09/2020              | <a href="https://www.tbsnews.net/coronavirus-chronicle/covid-19-bangladesh/govt-allows-antigen-tests-135631">https://www.tbsnews.net/coronavirus-chronicle/covid-19-bangladesh/govt-allows-antigen-tests-135631</a>                                                 | <b>Govt allows antigen tests</b>                                                  |
| 22/09/2020              | <a href="https://www.tbsnews.net/coronavirus-chronicle/covid-19-bangladesh/pmo-preserves-premiers-instructions-covid-deal-future">https://www.tbsnews.net/coronavirus-chronicle/covid-19-bangladesh/pmo-preserves-premiers-instructions-covid-deal-future</a>       | <b>PMO preserves premier's instructions on Covid to deal with future epidemic</b> |
| 22/09/2020              | <a href="https://www.tbsnews.net/coronavirus-chronicle/covid-19-bangladesh/govt-against-lockdown-keep-economy-afloat-cabinet-secy">https://www.tbsnews.net/coronavirus-chronicle/covid-19-bangladesh/govt-against-lockdown-keep-economy-afloat-cabinet-secy</a>     | <b>Govt against lockdown to keep economy afloat: Cabinet secretary</b>            |
| 23/09/2020              | <a href="https://www.tbsnews.net/coronavirus-chronicle/bold-public-spending-needed-covid-19-economic-recovery-unctad-136624">https://www.tbsnews.net/coronavirus-chronicle/bold-public-spending-needed-covid-19-economic-recovery-unctad-136624</a>                 | <b>Bold public spending needed for Covid-19 economic recovery: UNCTAD</b>         |
| 23/09/2020              | <a href="https://www.tbsnews.net/economy/aid-commitment-drops-will-improve-136432">https://www.tbsnews.net/economy/aid-commitment-drops-will-improve-136432</a>                                                                                                     | <b>Aid commitment drops but will improve</b>                                      |
| 24/09/2020              | <a href="https://www.tbsnews.net/coronavirus-chronicle/covid-19-bangladesh/front-line-doctors-distress-137359">https://www.tbsnews.net/coronavirus-chronicle/covid-19-bangladesh/front-line-doctors-distress-137359</a>                                             | <b>Front line doctors in distress</b>                                             |
| 24/09/2020              | <a href="https://www.tbsnews.net/coronavirus-chronicle/covid-19-bangladesh/when-virus-leaves-its-damage-lingers-136930">https://www.tbsnews.net/coronavirus-chronicle/covid-19-bangladesh/when-virus-leaves-its-damage-lingers-136930</a>                           | <b>When the virus leaves but its damage lingers</b>                               |
| 25/09/2020              | <a href="https://www.tbsnews.net/coronavirus-chronicle/covid-19-bangladesh/pandemic-forces-mom-sell-flowers-holding-20-day-old-baby">https://www.tbsnews.net/coronavirus-chronicle/covid-19-bangladesh/pandemic-forces-mom-sell-flowers-holding-20-day-old-baby</a> | <b>Pandemic forces mom to sell flowers holding 20-day-old baby in lap</b>         |
| 26/09/2020              | <a href="https://www.tbsnews.net/economy/7000-digital-entrepreneurs-emerge-ctg-pandemic-137698">https://www.tbsnews.net/economy/7000-digital-entrepreneurs-emerge-ctg-pandemic-137698</a>                                                                           | <b>7,000 digital entrepreneurs emerge in Ctg in pandemic</b>                      |
| 26/09/2020              | <a href="https://www.tbsnews.net/coronavirus-chronicle/covid-19-bangladesh/glimpse-betel-leaf-sellers-life-amid-pandemic-137692">https://www.tbsnews.net/coronavirus-chronicle/covid-19-bangladesh/glimpse-betel-leaf-sellers-life-amid-pandemic-137692</a>         | <b>A glimpse into a betel-leaf seller's life amid pandemic</b>                    |
| 26/09/2020              | <a href="https://www.tbsnews.net/bangladesh/world-bank-approves-200m-bangladesh-accessing-safe-water-137782">https://www.tbsnews.net/bangladesh/world-bank-approves-200m-bangladesh-accessing-safe-water-137782</a>                                                 | <b>E-commerce outlets offering grocery see highest growth</b>                     |
| 27/09/2020              | <a href="https://www.tbsnews.net/coronavirus-chronicle/covid-19-bangladesh/undp-launches-maskupbangladesh-138403">https://www.tbsnews.net/coronavirus-chronicle/covid-19-bangladesh/undp-launches-maskupbangladesh-138403</a>                                       | <b>UNDP launches #MaskUpBangladesh</b>                                            |
| 27/09/2020              | <a href="https://www.tbsnews.net/economy/rajshahi-sugar-mill-staff-unpaid-three-months-138085">https://www.tbsnews.net/economy/rajshahi-sugar-mill-staff-unpaid-three-months-138085</a>                                                                             | <b>Rajshahi Sugar Mill staff unpaid for three months</b>                          |

| Date of the news | News URL                                                                                                                                                                                                                                                                | Title of the news                                                          |
|------------------|-------------------------------------------------------------------------------------------------------------------------------------------------------------------------------------------------------------------------------------------------------------------------|----------------------------------------------------------------------------|
| 27/09/2020       | <a href="https://www.tbsnews.net/coronavirus-chronicle/covid-19-bangladesh/hairdresser-chunnu-wait-more-clients-138121">https://www.tbsnews.net/coronavirus-chronicle/covid-19-bangladesh/hairdresser-chunnu-wait-more-clients-138121</a>                               | Hairdresser Chunnu in wait for more clients                                |
| 28/09/2020       | <a href="https://www.tbsnews.net/bangladesh/8th-5-year-plan-quick-recovery-pandemic-shocks-gets-top-priority-138880">https://www.tbsnews.net/bangladesh/8th-5-year-plan-quick-recovery-pandemic-shocks-gets-top-priority-138880</a>                                     | 8th 5-year plan: Quick recovery from pandemic shocks gets top priority     |
| 28/09/2020       | <a href="https://www.tbsnews.net/coronavirus-chronicle/covid-19-bangladesh/covid-19-double-edged-sword-dentist-138514">https://www.tbsnews.net/coronavirus-chronicle/covid-19-bangladesh/covid-19-double-edged-sword-dentist-138514</a>                                 | Covid-19: A double-edged sword for a dentist                               |
| 29/09/2020       | <a href="https://www.tbsnews.net/bangladesh/education/closure-educational-institutions-extended-till-october-31-139273">https://www.tbsnews.net/bangladesh/education/closure-educational-institutions-extended-till-october-31-139273</a>                               | Closure of educational institutions extended till October 31               |
| 29/09/2020       | <a href="https://www.tbsnews.net/bangladesh/education/interactive-cares-launches-e-learning-platform-interactive-cares-courses-139186">https://www.tbsnews.net/bangladesh/education/interactive-cares-launches-e-learning-platform-interactive-cares-courses-139186</a> | Interactive Cares launches e-learning platform 'Interactive Cares Courses' |
| 29/09/2020       | <a href="https://www.tbsnews.net/bangladesh/health/how-are-our-cardiac-patients-doing-during-pandemic-138928">https://www.tbsnews.net/bangladesh/health/how-are-our-cardiac-patients-doing-during-pandemic-138928</a>                                                   | How are our cardiac patients doing during the pandemic?                    |
| 29/09/2020       | <a href="https://www.tbsnews.net/bangladesh/health/service-closure-leaves-ctg-cardiac-patients-lurch-138925">https://www.tbsnews.net/bangladesh/health/service-closure-leaves-ctg-cardiac-patients-lurch-138925</a>                                                     | Service closure leaves Ctg cardiac patients in the lurch                   |
| 30/09/2020       | <a href="https://www.tbsnews.net/coronavirus-chronicle/covid-19-bangladesh/uk-vaccine-be-available-bangladesh-no-clinical-trial-here">https://www.tbsnews.net/coronavirus-chronicle/covid-19-bangladesh/uk-vaccine-be-available-bangladesh-no-clinical-trial-here</a>   | UK vaccine to be available to Bangladesh, no clinical trial here: UK envoy |

#### Ghana Media articles

| DD/MM/YYYY | Author Affiliation                   | Newspaper           | Title                                                                                           |
|------------|--------------------------------------|---------------------|-------------------------------------------------------------------------------------------------|
| 14/03/2020 | Daily Guide Network<br>Melvin Tarlue | Daily Guide Network | Banks Take Precautionary Measures Against Coronavirus                                           |
| 16/03/2020 | Daily Guide Network                  | Daily Guide Network | Report responsibly on covid-19                                                                  |
| 16/03/2020 | Daily Guide Network                  | Daily Guide Network | Akufo-Addo Meets To Strategise How To Produce Sanitizers And Medicines In Ghana For Coronavirus |
| 17/03/2020 | Daily Guide Network<br>Melvin Tarlue | Daily Guide Network | Jack Ma Foundation Donates Coronavirus Testing Kits To Africa                                   |
| 18/03/2020 | Daily Guide Network<br>Melvin Tarlue | Daily Guide Network | Coronavirus: NYA Urges Youth To Take Precaution                                                 |
| 18/03/2020 | Daily Guide Network                  | Daily Guide Network | GHAMRO Cautions Its Members                                                                     |

| <b>DD/MM/YYYY</b> | <b>Author<br/>Affiliation</b>                               | <b>Newspaper</b>       | <b>Title</b>                                                       |
|-------------------|-------------------------------------------------------------|------------------------|--------------------------------------------------------------------|
|                   | George Clifford<br>Owusu                                    |                        |                                                                    |
| 18/03/2020        | Daily Guide<br>Network<br><br>Sharon Willis<br>Brown-Acquah | Daily Guide<br>Network | Ghana CEOs Join Fight Against<br>Coronavirus                       |
| 18/03/2020        | Daily Guide<br>Network<br><br>Melvin Tarlue                 | Daily Guide<br>Network | Coronavirus Outbreak: Ghanaian<br>Churches Hold Digital Services   |
| 19/03/2020        | Daily Guide<br>Network<br><br>Not listed                    | Daily Guide<br>Network | Delta Agro Limited Gives To Korle-<br>Bu In Coronavirus Prevention |
| 19/03/2020        | Daily Guide<br>Network<br><br>Jamila Akweley<br>Okertchiri  | Daily Guide<br>Network | Mulan Activity Center Gives Back                                   |
| 20/03/2020        | Daily Guide<br>Network<br><br>Not listed                    | Daily Guide<br>Network | St. John's Fertility Centre Donates To<br>GIS                      |
| 20/03/2020        | Daily Guide<br>Network<br><br>Melvin Tarlue                 | Daily Guide<br>Network | Ghana Bar Association Issues<br>Guidelines Over Coronavirus        |
| 27/03/2020        | Daily Guide<br>Network                                      | Daily Guide<br>Network | Napo Offers Covid-19 Suggestions                                   |
| 28/03/2020        | Daily Guide<br>Network                                      | Daily Guide<br>Network | Govt Disinfects Kumasi Markets                                     |
| 29/03/2020        | Daily Guide<br>Network                                      | Daily Guide<br>Network | Guinness Ghana Supports Fight<br>Against Covid-19 Registration     |
| 30/03/2020        | Daily Guide<br>Network                                      | Daily Guide<br>Network | Ofori-Atta Predicts Drop In 2020<br>GDP                            |

| <b>DD/MM/YYYY</b> | <b>Author<br/>Affiliation</b> | <b>Newspaper</b>       | <b>Title</b>                                               |
|-------------------|-------------------------------|------------------------|------------------------------------------------------------|
| 30/03/2020        | Daily Guide<br>Network        | Daily Guide<br>Network | ADB Fights Covid-19 With GHC1m                             |
| 30/03/2020        | Daily Guide<br>Network        | Daily Guide<br>Network | Andre Ayew Supports COVID-19<br>Fight In Northern Region   |
| 30/03/2020        | Daily Guide<br>Network        | Daily Guide<br>Network | Coronavirus Update: Drones Spray<br>Markets In Bono Region |
| 30/03/2020        | Daily Guide<br>Network        | Daily Guide<br>Network | Great Kofata Gives Gh100, 000 In<br>Coronavirus Fight      |
| 04/04/2020        | Daily Guide<br>Network        | Daily Guide<br>Network | New Data Methods Helping Fight<br>Against Covid-19 – GSS   |
| 04/04/2020        | Daily Guide<br>Network        | Daily Guide<br>Network | Foodstuff Locked Up At Techiman<br>Market                  |
| 05/04/2020        | Daily Guide<br>Network        | Daily Guide<br>Network | Prophet Owusu Bempah Donates To<br>Ghana Prisons Service   |

| <b>DD/MM/YYYY</b> | <b>Author Affiliation</b>         | <b>Newspaper</b>    | <b>Title</b>                                                            |
|-------------------|-----------------------------------|---------------------|-------------------------------------------------------------------------|
| 06/04/2020        | Daily Guide Network               | Daily Guide Network | Gospel Artiste Ohemaa Mercy Distributes Hand Sanitizers To Market Women |
| 06/04/2020        | Daily Guide Network               | Daily Guide Network | Massive Disinfection In WR Markets                                      |
| 06/04/2020        | Daily Guide Network               | Daily Guide Network | Female Doctors Support Vulnerable People In Kumasi                      |
| 26/03/2020        | Daily Guide Network<br>Not listed | Daily Guide Network | COVID-19: Scrap CST To Aid Online Studies                               |
| 26/03/2020        | Daily Guide Network<br>Not listed | Daily Guide Network | Kasapreko Donates 2,400 Bottles Of Sanitizers To MOI                    |
| 26/03/2020        | Daily Guide Network<br>Not listed | Daily Guide Network | Lockdown Now! Doctors Urge Nana                                         |
| 26/03/2020        | Daily Guide Network<br>Not listed | Daily Guide Network | Covid-19 Cushion: Republic Bank Defers Loan Repayment                   |
| 26/03/2020        | Daily Guide Network<br>Not listed | Daily Guide Network | Akufo-Addo Hosts Transport Owners                                       |
| 25/03/2020        | Daily Guide Network<br>Not listed | Daily Guide Network | Covid-19 Measures: Gov't Cleans Agbogbloshie Market                     |
| 25/03/2020        | Daily Guide Network               | Daily Guide Network | Enterprise Group Donates To 3 Health Outfits                            |

| <b>DD/MM/YYYY</b> | <b>Author Affiliation</b>         | <b>Newspaper</b>    | <b>Title</b>                                                                       |
|-------------------|-----------------------------------|---------------------|------------------------------------------------------------------------------------|
|                   | Not listed                        |                     |                                                                                    |
| 25/03/2020        | Daily Guide Network<br>Not listed | Daily Guide Network | TUC Demands Possible Shutdown                                                      |
| 25/03/2020        | Daily Guide Network<br>Not listed | Daily Guide Network | Govt Donates Covid-19 Items In UE                                                  |
| 25/03/2020        | Daily Guide Network<br>Not listed | Daily Guide Network | GIBA, GJA Train On COVID-19 Communications                                         |
| 25/03/2020        | Daily Guide Network<br>Not listed | Daily Guide Network | Kasapreko Donates 2,400 Bottles Of Sanitizers To MOI To Aid Fight Against COVID 19 |
| <b>DD/MM/YYYY</b> | <b>Author Affiliation</b>         | <b>Newspaper</b>    | <b>Title</b>                                                                       |
| 28/04/2020        | Daily Guide Network               | Daily Guide Network | AFCONS Infrastructure Supports Assembly With PPE                                   |
| 29/04/2020        | Daily Guide Network               | Daily Guide Network | Small Scale Miners, Others Assist Covid-19 Fund                                    |
| 29/04/2020        | Daily Guide Network               | Daily Guide Network | FON Packaging Gives to Accra Regional Hospital                                     |
| 30/04/2020        | Daily Guide Network               | Daily Guide Network | Nestlé Ghana Supports Covid-19 Relief Efforts                                      |
| 30/04/2020        | Daily Guide Network               | Daily Guide Network | Muslims Donate To Covid-19 Fund                                                    |
| 1/05/2020         | Daily Guide Network               | Daily Guide Network | 45 Arrested For Holding Church Service                                             |
| 1/05/2020         | Daily Guide Network               | Daily Guide Network | Zenith Bank announces enhancement of its USSD Service *966#                        |
| 2/05/2020         | Daily Guide Network               | Daily Guide Network | ADB Donates To 4 Medical Institutions In Central Region                            |
| 4/05/2020         | Daily Guide Network               | Daily Guide Network | Free Food For Para-Athletes...To Face Covid-19                                     |
| 4/05/2020         | Daily Guide Network               | Daily Guide Network | Tobinco To Produce Covid-19 Drugs                                                  |
| 4/05/2020         | Daily Guide Network               | Daily Guide Network | Azar Group Supports Covid-19 Trust Fund                                            |
| 5/05/2020         | Daily Guide Network               | Daily Guide Network | Abroso Supports Covid-19 Fight                                                     |
| 5/05/2020         | Daily Guide Network               | Daily Guide Network | Dr Caesar Donates Lina Energy Tea To Korle-Bu Hospital                             |

| <b>DD/MM/YYYY</b> | <b>Author Affiliation</b> | <b>Newspaper</b>    | <b>Title</b>                                                                       |
|-------------------|---------------------------|---------------------|------------------------------------------------------------------------------------|
| 5/05/2020         | Daily Guide Network       | Daily Guide Network | Nyonkopa, Bc Ghana Support Cocoa Farmers                                           |
| 5/05/2020         | Daily Guide Network       | Daily Guide Network | 3 Groups Donate To Covid-19 Fund                                                   |
| <b>DD/MM/YYYY</b> | <b>Author Affiliation</b> | <b>Newspaper</b>    | <b>Title</b>                                                                       |
| 22/04/2020        | Daily Guide Network       | Daily Guide Network | Shippers' Authority Assists Ridge, Tema Hospitals                                  |
| 23/04/2020        | Daily Guide Network       | Daily Guide Network | Standard Chartered Commits GHS1m To Fight Covid-19                                 |
| 23/04/2020        | Daily Guide Network       | Daily Guide Network | Suame Market Goes Double-Track                                                     |
| 23/04/2020        | Daily Guide Network       | Daily Guide Network | Coronavirus Response: Face Mask Mandatory In Accra                                 |
| 23/04/2020        | Daily Guide Network       | Daily Guide Network | Sunyani, Techiman Markets Closed Down                                              |
| 23/04/2020        | Daily Guide Network       | Daily Guide Network | Deseret Hospital Gets Covid-19 Prevention Items                                    |
| 24/04/2020        | Daily Guide Network       | Daily Guide Network | Zoomlion Disinfects Prison Headquarters, James Camp Prisons And Soul Clinic School |
| 24/04/2020        | Daily Guide Network       | Daily Guide Network | Charger Limited Aids War Memorial Hospital                                         |
| 26/04/2020        | Daily Guide Network       | Daily Guide Network | Soldiers Builds COVID-19 Isolation Centre At Kwabenya                              |
| 28/04/2020        | Daily Guide Network       | Daily Guide Network | PZ Traders Undergo Covid-19 Test                                                   |
| 28/04/2020        | Daily Guide Network       | Daily Guide Network | Agormanya Market Closed Down                                                       |
| 16/04/2020        | Daily Guide Network       | Daily Guide Network | Rebecca Foundation Presents Relief Boxes To Greater Kumasi                         |
| 16/04/2020        | Daily Guide Network       | Daily Guide Network | Rebecca, Merck Foundations Donate Relief Boxes To Less Privileged                  |
| 18/04/2020        | Daily Guide Network       | Daily Guide Network | LPG Marketers Association Donates To Covid-19 Fund                                 |
| 18/04/2020        | Daily Guide Network       | Daily Guide Network | Zoomlion Donates \$20,000 To Noguchi                                               |
| 18/04/2020        | Daily Guide Network       | Daily Guide Network | Gov't Decides On 200 Pregnant Kayayies                                             |
| 19/04/2020        | Daily Guide Network       | Daily Guide Network | Victory Bible Church Donates Food To Over 2,000 Awoshie Residents                  |
| 20/04/2020        | Daily Guide Network       | Daily Guide Network | Zipline Ghana Begin Emergency Delivery Of Covid-19 Test Samples                    |
| 21/04/2020        | Daily Guide Network       | Daily Guide Network | COVID-19 : Hisense, Despite Group Donate To Ayawaso West                           |
| 21/04/2020        | Daily Guide Network       | Daily Guide Network | AH Hotel Enjoys Zoomlion Disinfection Service                                      |



| <b>DD/MM/YYYY</b> | <b>Author<br/>Affiliation</b>                   | <b>Newspaper</b>       | <b>Title</b>                                                           |
|-------------------|-------------------------------------------------|------------------------|------------------------------------------------------------------------|
| 22/04/2020        | Daily Guide<br>Network                          | Daily Guide<br>Network | President Pushes For Guidelines For<br>Face Masks Production           |
| 16/04/2020        | Daily Guide<br>Network<br><br>Not listed        | Daily Guide<br>Network | Covid-19 Fight: Betway Supports<br>Government With GHS 150,000         |
| 15/04/2020        | Daily Guide<br>Network<br><br>Not listed        | Daily Guide<br>Network | Zenith Bank Supports COVID-19<br>Fund With GHS 1m                      |
| 15/04/2020        | Daily Guide<br>Network<br><br>Not listed        | Daily Guide<br>Network | Access Bank Joins COVID-19 Fight<br>With Ambulance Donation To<br>UPSA |
| 15/04/2020        | Daily Guide<br>Network<br><br>Not listed        | Daily Guide<br>Network | 8 Companies Donate To Covid-19<br>Fund                                 |
| 15/04/2020        | Daily Guide<br>Network<br><br>Not listed        | Daily Guide<br>Network | Alpha Lotto Donates Ghc100,000 To<br>Covid-19 Fund                     |
| 14/04/2020        | Daily Guide<br>Network<br><br>Not listed        | Daily Guide<br>Network | GB Foods Supports Covid-19 Fund                                        |
| 14/04/2020        | Daily Guide<br>Network<br><br>Not listed        | Daily Guide<br>Network | Jay Kay Industries Donates To<br>Covid-19 Fund                         |
| 14/04/2020        | Daily Guide<br>Network<br><br>Emmanuel<br>Opoku | Daily Guide<br>Network | Gold Fields Support COVID-19<br>Fight With \$833,000                   |
| 14/04/2020        | Daily Guide<br>Network<br><br>Not listed        | Daily Guide<br>Network | COVID-19 : TT Brothers Show Love<br>To Tema SOS                        |
| 13/04/2020        | Daily Guide<br>Network<br><br>Not listed        | Daily Guide<br>Network | Covid-19: 70 Doctors Trained For<br>Risk Communication                 |
| 13/04/2020        | Daily Guide<br>Network<br><br>Not listed        | Daily Guide<br>Network | Safebond Supports Police, Military<br>In Covid-19 Fight                |

| <b>DD/MM/YYYY</b> | <b>Author Affiliation</b>         | <b>Newspaper</b>    | <b>Title</b>                                                  |
|-------------------|-----------------------------------|---------------------|---------------------------------------------------------------|
| 13/04/2020        | Daily Guide Network<br>Not listed | Daily Guide Network | Coronavirus Response: Bawumia Launches Covid-19 Tracker App   |
| 12/04/2020        | Daily Guide Network<br>Not listed | Daily Guide Network | B5 Plus Fights COVID 19 With Free Oxygen                      |
| 11/04/2020        | Daily Guide Network<br>Not listed | Daily Guide Network | Angel Supports K'si Hospitals                                 |
| 11/04/2020        | Daily Guide Network<br>Not listed | Daily Guide Network | Ho Central Market to Be Closed On Market Days                 |
| 10/04/2020        | Daily Guide Network<br>Not listed | Daily Guide Network | COVID-19: Glico Provides Essentials To Prisons Service        |
| 10/04/2020        | Daily Guide Network<br>Not listed | Daily Guide Network | Chobi Ghana Donates To Rebecca Foundation's Covid-19 Campaign |
| 10/04/2020        | Daily Guide Network<br>Not listed | Daily Guide Network | Sunda Donates Toiletries To KATH                              |
| 10/04/2020        | Daily Guide Network<br>Not listed | Daily Guide Network | Covid-19 Relief: IPMC Supports 500 Households In Nima         |
| 09/04/2020        | Daily Guide Network<br>Not listed | Daily Guide Network | Nana Inaugurates Covid-19 Fund Board                          |
| 09/04/2020        | Daily Guide Network<br>Not listed | Daily Guide Network | Ghana Exim Bank Donates GHC250,000 To Covid-19 Fund           |
| 09/04/2020        | Daily Guide Network<br>Not listed | Daily Guide Network | GIIF Donates Ghc 500k To Covid-19 Trust Fund                  |
| 09/04/2020        | Daily Guide Network<br>Not listed | Daily Guide Network | More Donations For Covid-19 Fight                             |

| <b>DD/MM/YYYY</b> | <b>Author<br/>Affiliation</b>                 | <b>Newspaper</b>       | <b>Title</b>                                                   |
|-------------------|-----------------------------------------------|------------------------|----------------------------------------------------------------|
| 09/04/2020        | Daily Guide<br>Network<br><br>Not listed      | Daily Guide<br>Network | Gov't To Launch New Mobile App<br>Tracing Coronavirus Carriers |
| 08/04/2020        | Daily Guide<br>Network<br><br>Not listed      | Daily Guide<br>Network | Mastercard Foundation, NBSSI<br>Support MSMEs                  |
| 08/04/2020        | Daily Guide<br>Network<br><br>Not listed      | Daily Guide<br>Network | Keda, Sunda International, Donate<br>To Covid-19 Fund          |
| 08/04/2020        | Daily Guide<br>Network<br><br>Not listed      | Daily Guide<br>Network | Hollard Ghana Donates 100k To<br>Covid-19 Fund                 |
| 08/04/2020        | Daily Guide<br>Network<br><br>Not listed      | Daily Guide<br>Network | More Coys Donate To Covid-19<br>Fund                           |
| 08/04/2020        | Daily Guide<br>Network<br><br>Not listed      | Daily Guide<br>Network | Obuasi Traders Resist Relocation<br>Move                       |
| 08/04/2020        | Daily Guide<br>Network<br><br>Not listed      | Daily Guide<br>Network | NYA Supports MoH With Essentials<br>To Fight Covid-19          |
| 07/04/2020        | Daily Guide<br>Network<br><br>Daniel Frimpong | Daily Guide<br>Network | CEO Network To Donate<br>Ghc200,000 To Covid-19 Fund           |
| 07/04/2020        | Daily Guide<br>Network<br><br>Not listed      | Daily Guide<br>Network | Wilmar, Eastern Region MMDCEs<br>Support Covid-19 Relief Fund  |
| 07/04/2020        | Daily Guide<br>Network<br><br>Not listed      | Daily Guide<br>Network | Republic Bank Supports Covid-19<br>Fight With \$2m             |
| 07/04/2020        | Daily Guide<br>Network<br><br>Not listed      | Daily Guide<br>Network | MTN Announces Ghc 5m Package<br>For Covid-19                   |
| 07/04/2020        | Daily Guide<br>Network<br><br>Not listed      | Daily Guide<br>Network | More Donations For Covid-19 Fund                               |

| <b>DD/MM/YYYY</b> | <b>Author<br/>Affiliation</b>               | <b>Newspaper</b>       | <b>Title</b>                                                                                         |
|-------------------|---------------------------------------------|------------------------|------------------------------------------------------------------------------------------------------|
| 07/04/2020        | Daily Guide<br>Network<br><br>Not listed    | Daily Guide<br>Network | Foundation Supports Fight Against<br>Covid-19.                                                       |
| 26/5/2020         | Daily Guide<br>Network                      | Daily Guide<br>Network | De Colours Foundation Fights Covid-<br>19 In Ketu South                                              |
| 27/5/2020         | Daily Guide<br>Network                      | Daily Guide<br>Network | Covid19 Relief: Ketu South MCE<br>Lauds Foundation For 300 Disabled<br>Persons                       |
| 28/5/2020         | Daily Guide<br>Network<br>Emmanuel<br>Opoku | Daily Guide<br>Network | Takoradi Markets Closed Down Over<br>Covid-19                                                        |
| 28/5/2020         | Daily Guide<br>Network                      | Daily Guide<br>Network | Apsonic Motors Supports Tema<br>Immigration                                                          |
| 13/05/2020        | Daily Guide<br>Network                      | Daily Guide<br>Network | GHANSU Shows Love To Members                                                                         |
| 13/05/2020        | Daily Guide<br>Network                      | Daily Guide<br>Network | BIMA Ghana Offers GHS500,000<br>Support For Customers                                                |
| 13/05/2020        | Daily Guide<br>Network                      | Daily Guide<br>Network | Charger Ltd CEO Supports Media In<br>Upper East                                                      |
| 13/05/2020        | Daily Guide<br>Network                      | Daily Guide<br>Network | Ghana Friendship Association Of<br>Edmonton Donates \$20k To Covid-19<br>Fund                        |
| 14/05/2020        | Daily Guide<br>Network                      | Daily Guide<br>Network | Aurum Institute Supports Covid-19<br>Fight                                                           |
| 15/05/2020        | Daily Guide<br>Network                      | Daily Guide<br>Network | GGA Donates To Achimota Hospital                                                                     |
| 15/05/2020        | Daily Guide<br>Network                      | Daily Guide<br>Network | Dagbon Forum Donates PPE In NR                                                                       |
| 15/05/2020        | Daily Guide<br>Network                      | Daily Guide<br>Network | Registrar-General Releases<br>Guidelines For AGMs                                                    |
| 15/05/2020        | Daily Guide<br>Network                      | Daily Guide<br>Network | ADR Practitioners Support Covid-19<br>Fund                                                           |
| 16/05/2020        | Daily Guide<br>Network                      | Daily Guide<br>Network | COVID-19 Vivo Energy and Retailers<br>Install Water Storage Facilities at<br>Lorry Parks and Markets |
| 18/05/2020        | Daily Guide<br>Network                      | Daily Guide<br>Network | Journalists Trained On Covid-19<br>Safety Measures                                                   |
| 19/05/2020        | Daily Guide<br>Network                      | Daily Guide<br>Network | Obuasi Rotational System Enters<br>Second Week                                                       |
| 20/05/2020        | Daily Guide<br>Network                      | Daily Guide<br>Network | Absa Ghana Introduces 50 New<br>Intelligent ATMs                                                     |

| <b>DD/MM/YYYY</b> | <b>Author<br/>Affiliation</b>                              | <b>Newspaper</b>       | <b>Title</b>                                                                    |
|-------------------|------------------------------------------------------------|------------------------|---------------------------------------------------------------------------------|
| 03/06/2020        | Daily Guide<br>Network<br><br>Melvin Tarlue                | Daily Guide<br>Network | Gov't Releases Guidelines For<br>Tourism, Hospitality Sectors                   |
| 05/06/2020        | Daily Guide<br>Network                                     | Daily Guide<br>Network | Zoomlion Begins National<br>Disinfection Exercise Of Mosques                    |
| 10/06/2020        | Daily Guide<br>Network                                     | Daily Guide<br>Network | OLAM, Temasek Foundation Donate<br>COVID-19 Test Kits                           |
| 10/06/2020        | Daily Guide<br>Network<br><br>Jamila Akweley<br>Okertchiri | Daily Guide<br>Network | Intravenous Infusion Supports<br>Noguchi                                        |
| 13/06/2020        | Daily Guide<br>Network                                     | Daily Guide<br>Network | GBA Donates PPE To Judicial<br>Service                                          |
| 13/06/2020        | Daily Guide<br>Network<br><br>Issah Mohammed               | Daily Guide<br>Network | Accra Friendship Club Supports<br>Mamobi Hospital                               |
| 16/06/2020        | Daily Guide<br>Network<br><br>Eric Kombat                  | Daily Guide<br>Network | POS Foundation Supports Tamale<br>Central Prison With PPEs To Fight<br>Covid-19 |

| <b>DD/MM/YYYY</b> | <b>Author<br/>Affiliation</b>                          | <b>Newspaper</b>       | <b>Title</b>                                                               |
|-------------------|--------------------------------------------------------|------------------------|----------------------------------------------------------------------------|
|                   |                                                        |                        |                                                                            |
| 06/05/2020        | Daily Guide<br>Network                                 | Daily Guide<br>Network | GCB Bank Donates 40 Jumbo Poly Tanks To Gov't                              |
| 06/05/2020        | Daily Guide<br>Network                                 | Daily Guide<br>Network | Baptist Donates To Covid-19 Fund                                           |
| 06/05/2020        | Daily Guide<br>Network                                 | Daily Guide<br>Network | Qatar Charity, COMOG Assist 200 Families                                   |
| 7/05/2020         | Daily Guide<br>Network                                 | Daily Guide<br>Network | Fidelity Supports Covid-19 Isolation Facility                              |
| 7/05/2020         | Daily Guide<br>Network                                 | Daily Guide<br>Network | Banks To Raise GHS3 Billion - To Support Hospitality Industry              |
| 7/05/2020         | Daily Guide<br>Network                                 | Daily Guide<br>Network | Fabrimetal Partners Gov't In Covid19 Fight; Pledges To Provide Oxygen      |
| 7/05/2020         | Daily Guide<br>Network                                 | Daily Guide<br>Network | B5 Plus Dismisses Price Increment Report; Offers Free Oxygen For Hospitals |
| 8/05/2020         | Daily Guide<br>Network                                 | Daily Guide<br>Network | Trust Hospital Closes for Fumigation                                       |
| 8/05/2020         | Daily Guide<br>Network                                 | Daily Guide<br>Network | Churches Prepare For Reopening                                             |
| 12/05/2020        | Daily Guide<br>Network                                 | Daily Guide<br>Network | Hollard Provides Free Covid-19 Cover For All                               |
| 13/05/2020        | Daily Guide<br>Network                                 | Daily Guide<br>Network | Spare Parts Dealers, Others Support Covid Fund                             |
| 29/06/2020        | Ellen Dapaah                                           | Citi newsroom          | GMA elated over extension of tax reliefs, allowances for health workers    |
| 30/6/2020         | Daily Guide<br>Network<br>Jamila Akweley<br>Okertchiri | Daily Guide<br>Network | The FDA seizes fake covid-19 drug                                          |
| 30/6/2020         | Daily Guide<br>Network<br>Melvin Tarlue                | Daily Guide<br>Network | Greater Accra Bar Fights Coronavirus At Accra High Court                   |
| 30/6/2020         | Daily Guide<br>Network<br>Melvin Tarlue                | Daily Guide<br>Network | Comply with covid-19 restrictions                                          |
| 01/07/2020        | Daily Guide<br>Network<br>Jamila Akweley<br>Okertchir  | Daily Guide<br>Network | Euroget Donates Ambulance To GHS                                           |
| 2/7/2020          | Daily Guide<br>Network                                 | Daily Guide<br>Network | Commercial Drivers Strike In Takoradi                                      |

| <b>DD/MM/YYYY</b>        | <b>Author<br/>Affiliation</b>                          | <b>Newspaper</b>       | <b>Title</b>                                                                                                               |
|--------------------------|--------------------------------------------------------|------------------------|----------------------------------------------------------------------------------------------------------------------------|
|                          | Emmanuel<br>Opoku                                      |                        |                                                                                                                            |
| 02/07/2020               | Daily Guide<br>Network<br>Daniel Bampoe                | Daily Guide<br>Network | ECG Power Queens Supports<br>Koforidua Prisons                                                                             |
| 2/7/2020                 | Desmond Kofi<br>Tawiah                                 | Graphic online         | COVID-19 Private Sector Fund<br>appeals for support G                                                                      |
| 2/7/2020                 | Victoria Kissiedu                                      | Graphic online         | YINSON supports COVID-19 fight<br>with biological safety cabinet                                                           |
| 2/7/2020                 | Bbc.com                                                | Graphic online         | Corona Quacks: Exposing fake<br>coronavirus cures in Ghana                                                                 |
| 2/7/2020                 | Joshua Bediako<br>Koomson                              | Graphic online         | Military deployment to ensure border<br>safety - Defence Minister                                                          |
| 2/7/2020                 | Emmanuel Bruce                                         | Graphic online         | Springboard partners two institutions<br>to launch COVID-19 recovery<br>programme -Aims to support 692,000<br>young people |
| 17/07/2020               | Daily Guide<br>Network                                 | Daily Guide<br>Network | Fidelity Bank Builds Capacity Of<br>SMEs                                                                                   |
| 17/06/2020               | Daily Guide<br>Network<br><br>Malvin Tarlue            | Daily Guide<br>Network | Gov't Working To Set Up 2 Covid-19<br>Hospitals In Ashanti Region Minister                                                 |
| 18/06/2020               | Daily Guide<br>Network<br><br>Enerst Kofi Adu          | Daily Guide<br>Network | NALAG Wants Assembly Members<br>In Covid-19 Fight                                                                          |
| 18/06/2020<br>17/06/2020 | Graphic.com.gh                                         | Graphic online         | HELEH Africa Foundation donates to<br>Covid 19 National Trust Fund                                                         |
| 20/06/2020<br>18/6/2020  | Albert Tetteh<br>Wayoe                                 | Graphic online         | Swimming: GSA issues guidelines for<br>reopening of pools                                                                  |
| 23/07/2020               | Daily Guide<br>Network<br>Jamila Akweley<br>Okertchiri | Daily Guide<br>Network | China's First Lady Supports Mrs<br>Akufo-Addo In Covid-19 Fight                                                            |
| 23/07/2020               | Daily Guide<br>Network                                 | Daily Guide<br>Network | Local Govt Ministry Applauded For<br>2nd Disinfection Exercise In Markets,<br>Lorry Parks                                  |

| <b>DD/MM/YYYY</b> | <b>Author<br/>Affiliation</b>                       | <b>Newspaper</b>    | <b>Title</b>                                                                        |
|-------------------|-----------------------------------------------------|---------------------|-------------------------------------------------------------------------------------|
| 23/07/2020        | Maxwell Akalaare Adombila                           | Graphic online      | Large enterprises to benefit from GHC1.2bn stimulus package                         |
| 24/07/2020        | Daily Guide Network                                 | Daily Guide Network | Demand For Educational TV Channel Grows Amid COVID-19                               |
| 24/07/2020        | Graphic.com.gh                                      | Graphic online      | Markets, lorry parks in Ahafo undergo second disinfection exercise                  |
| 14/07/2020        | Graphic.com.gh                                      | Graphic online      | BOST Fumigate Head Office in wake of covid-19 infection                             |
| 14/07/2020        | Graphic<br>Linda Sarfoa Antwi                       | Graphic showbiz     | 'Corona life' to start streaming on Tuesday                                         |
| 14/07/2020        | Graphic.com.gh                                      | Graphic online      | SafeCare 4Covid App introduced for health care workers                              |
| 14/07/2020        | Graphic.com.gh                                      | Graphic online      | Covid-19: Ibrahim Mahama donates anaesthetic machine to UGMC                        |
| 15/07/2020        | My joy online.com                                   | My joy online       | FLF Africa launches financial literacy for corona virus Alleviation                 |
| 15/07/2020        | Daily Guide Network<br>Jamila Akweley Okertchiri    | Daily Guide         | PSGH Supports Pharmacists                                                           |
| 15/07/2020        | Daily Guide Network<br>Melvin Tarlue                | Daily Guide         | Arrest, Prosecute Persons Who Flout Covid-19 Protocols GBA                          |
| 15/07/2020        | Emelia Ennin Abbey                                  | Graphic             | Fake contact tracer arrested                                                        |
| 16/7/2020         | Daily Guide Network<br>y Sharon Willis Brown-Acquah | Daily Guide         | CEO Network Makes 2nd Donation To Covid-19 Trust Fund                               |
| 16/7/2020         | Daily Guide Network                                 | Daily Guide         | CRI Rejects Shutting Down Schools                                                   |
| 17/7/2020         | Daily Guide Network                                 | Daily Guide         | Covid-19 Fund Spends GH32m                                                          |
| 17/7/2020         | Daily Guide Network                                 | Daily Guide         | Covid-19 Trust Fund Gives To 11 Institutions                                        |
| 20/7/2020         | Gertrude Anka Nyavi                                 | Graphic online      | HELEH: Africa foundation launches campaign against covid-19 stigma                  |
| 20/7/2020         | Graphic.com.gh                                      | Graphic online      | STRATCOM Africa releases covid-19 related cartoon against stigma and discrimination |



| <b>DD/MM/YYYY</b> | <b>Author<br/>Affiliation</b>                     | <b>Newspaper</b>       | <b>Title</b>                                                                                                     |
|-------------------|---------------------------------------------------|------------------------|------------------------------------------------------------------------------------------------------------------|
| 20/7/2020         | Graphic.com.gh                                    | Graphic online         | Invest in Africa and mastercard foundation join forces to assist covid-hit companies in Ghana, Kenya and Senegal |
| 8/07/2020         | Joshua Bediako<br>Koomson                         | Graphic online         | M Y Caeser company limited present immune boosters to parliament house                                           |
| 8/07/2020         | Graphic Online                                    | Graphic online         | Noguchi receives US\$100,000 support from ATC Ghana to fight COVID-19                                            |
| 9/07/2020         | Daily Guide<br>Network<br><br>Melvin Tarlue.      | Daily Guide<br>Network | Gov't Considering Covid19 Inspection Regime For Companies                                                        |
| 9/07/2020         | Graphic.com.gh                                    | Graphic online         | COVID-19: Beko Electronics supports Adentan Health Directorate                                                   |
| 10/07/2020        | Daily Guide<br>Network<br><br>Issah<br>Mohammed-. | Daily Guide<br>Network | Kasoa Drivers Exploit Passengers                                                                                 |
| 10/07/2020        | Daily graphic                                     | Graphic online         | NPP-USA donates GH¢130,000 to support fight against COVID-19                                                     |
| 10/07/2020        | Graphic.com.gh                                    | Graphic online         | COVID-19: StarTimes donates 10,000 face masks to Police                                                          |
| 12/07/2020        | Daniel Kenu                                       | Graphic online         | Kumasi: COVID-19 Private Fund donates to Cheshire Home and Children's Home                                       |
| 03/07/2020        | Daily Guide<br>Network<br><br>Melvin Tarlue       | Daily Guide<br>Network | Sethi Brothers Ghana Donates Ghc 200,000 To Foreign Ministry                                                     |
| 5/07/2020         | Rosalind K.<br>Amoh                               | Graphic online         | GMA cries out over increasing COVID-19 spread as 3 top doctors succumb to disease                                |
| 06/07/2020        | Daily Guide<br>Network                            | Daily Guide<br>Network | Mantrac Ghana Donates \$10,000 To Covid-19 Trust Fund                                                            |

| <b>DD/MM/YYYY</b> | <b>Author<br/>Affiliation</b>          | <b>Newspaper</b>    | <b>Title</b>                                                                 |
|-------------------|----------------------------------------|---------------------|------------------------------------------------------------------------------|
| 07/07/2020        | Graphic business                       | Graphic online      | MTN Ghana zero-rates CoRe website                                            |
| 08/07/2020        | Daily Guide Network<br>Ernest Kofi Adu | Daily Guide Network | Transport Fares Up By 15%                                                    |
| 24/7/2020         | Daily Guide Network                    | Daily Guide Network | New Crystal Provides Support Services To Organizations                       |
| 24/7/2020         | Getrude Ankah Nyavi                    | Graphic online      | Covid 19: Tobinco produces hydroxychloroquine locally                        |
| 24/7/2020         | Desmond Kofi Tawiah                    | Graphic online      | COVID-19: Omni Speciality Products donates to Noguchi                        |
| 24/7/2020         | Daily graphic                          | Graphic online      | CH foundation donates \$100,000 to covid-19 private sector fund              |
| 26/7/2020         | Enoch Darfah Frimpong                  | Graphic online      | Local firms produce, distribute 6.2 million nose mask                        |
| 26/7/2020         | Graphic.com.gh                         | Graphic online      | Joana Gyan foundation to Donate PPE to Wasa Agona Amenfi                     |
| 28 Jul 2020       | Graphic<br>Enoch Darfah Frimpong       | Graphic             | Transport operators agree to reduce transport fares by 10 percent from Aug 1 |
| 28 Jul 2020       | Graphic<br>Ruby Delanyo Buafor         | Graphic             | Reduce transport fares — COPEC                                               |
| 28 Jul 2020       | Graphic<br>Kwame Larweh                | Graphic             | Top Archive donates to COVID-19 Trust Fund                                   |
| 31 Jul 2020       | Graphic<br>Maclean Kwofi               | Graphic             | Ghana's e-learning initiative gains momentum                                 |

| <b>DD/MM/YYYY</b> | <b>Author<br/>Affiliation</b>                    | <b>Newspaper</b>    | <b>Title</b>                                                         |
|-------------------|--------------------------------------------------|---------------------|----------------------------------------------------------------------|
| 02 Aug 2020       | Daily Guide Network<br>Jamila Akweley Okertchiri | Daily Guide Network | UG, SOFT Develop Chlorine Disinfectant To Aid Covid-19 Fight         |
| 13/08/2020        | News Desk                                        | Graphic online      | Sambus Geospatial assists Health Service with location software      |
| 16/08/2020        | Graphic.com.gh                                   | Graphic online      | COVID-19: Lions Club donates to Madina Polyclinic                    |
| 17/08/2020        | Daily Guide Network                              | Daily Guide Network | MultiChoice Ghana Donates PPE To KATH, Ga East Hospita               |
| 17/08/2020        | Graphic.com.gh                                   | Graphic online      | Philanthropic group supports three orphanages to fight COVID-19      |
| 18/08/2020        | Graphic.com.gh                                   | Graphic online      | Zipline lauded for efforts in fighting COVID-19                      |
| 20/08/2020        | Daily graphic                                    | Graphic online      | COVID-19 Trust Fund presents GH¢6.8m to Infectious Diseases Centre G |
| 03/08/2020        | Graphic<br>GRAPHIC.COM.GH                        | Graphic             | How the COVID-19 National trust Fund spent GHC32million              |
| 5 August 2020     | Daily Guide Network<br>Melvin Tarlue             | Daily Guide Network | GIZ Donates Covid-19 Support Items To Agric Ministry                 |
| 5 August 2020     | Daily Guide Network<br>Jamila AkweleyOkertchiri  | Daily Guide Network | VAMED Engineering Supports Covid-19 Fight                            |
| 6 August 2020     | Graphic<br>Samuel Tei Adano                      | Graphic             | 44 health facilities benefit from National COVID-19 Trust Fund       |
| 7 August 2020     | Graphic<br>Graphic.com.gh                        | Graphic             | GCB to donate GHC100,000 to Upper West Health directorate            |
| 11/08/2020        | Graphic<br>Emmanuel Baah                         | Graphic             | Asanteman Europe gives to 3 institutions                             |
| 05/09/2020        | Daily Guide Network                              | Daily Guide Network | GHS Organizes Covid19 Quiz For Kids                                  |

| <b>DD/MM/YYYY</b> | <b>Author<br/>Affiliation</b>             | <b>Newspaper</b>    | <b>Title</b>                                                                                    |
|-------------------|-------------------------------------------|---------------------|-------------------------------------------------------------------------------------------------|
|                   | Melvin Tarlue                             |                     |                                                                                                 |
| 02/09/2020        | No Author                                 | Cifi Fm Online      | Millennium Promise Alliance partners GHS to launch paperless Health declaration form at airport |
| 31/08/2020        | Citi Newsroom                             | Citi Newsroom       | Beiersdorf Ghana donates 50,000 Nivea skin care products to GHS                                 |
| 31/08/2020        | Graphic.com                               | Graphic             | ATOA Ghana organises training for Travel Agents                                                 |
| 22/09/2020        | Graphic                                   | Daily Graphic       | Stanbic Bank Ghana donates additional COVID-19 test kits to Ghana Health Service                |
| 17/09/2020        | Maclean Kwofi                             | Graphic Online      | Guinness supports bar operators with GH¢10m                                                     |
| 14/09/2020        | Daily Guide Network<br><br>Issah Mohammed | Daily Guide Network | MoH Receives 100,000 Face Masks                                                                 |
| 04/04/2020        | Daily Guide Network<br><br>Melvin Tarlue  | Daily Guide Network | Guinness Ghana Announces Ghc 10m Covid-19 Support For Customers                                 |
| 08/09/2020        | Graphic Business                          | Graphic             | AGRA mobilises private sector for agricultural investment opportunities                         |

225 total
